# Supplementary material for: Integral estimation of xenobiotics’ toxicity with regard to their metabolism in human organism
Source: publisher site journal article supplement (doi:10.1515/pac-2016-1205), 2017-07-25
Supplement: Supplementary file 1 [file pac-2016-1205_suppl.docx]

SUPPLEMENTARY MATERIALS

Integral estimation of xenobiotics’ toxicity with regard to their metabolism in human organism

Contents

|  |  |
| --- | --- |
| 1. Complete description of QSAR models. MNA models on the basis of PASS prediction results | 2 |
| 1. QNA models | 377 |

Complete description of QSAR models

MNA models

Model 1

-1.82(Aspartate transaminase inhibitor) + 0.584(CYP2D6 substrate) -0.803(Leukopenia) -0.222(CDK1/cyclin B inhibitor) + 0.162(NumAromAtoms) -0.512(Alopecia (hair loss)) -0.989(Thrombin inhibitor) + 0.675(Ceramide glucosyltransferase inhibitor) -0.396(Aldose reductase substrate) -0.0978(NumAcceptor) + 0.453(Carcinogenic. rat. male. lung) -0.0494(Length) + 0.117(Lipophilicity^2) + 0.165(Diamine oxidase inhibitor) -0.291(Adenosine A2a receptor antagonist) -0.56(Endothelin receptor antagonist) -0.788(CYP3A substrate) + 0.464(Immunosuppressant) -0.474(Phosphodiesterase VIII inhibitor) + 0.525(Erythema) -0.362(Proline racemase inhibitor) -0.0606(Fibrosis treatment) -1.1(Phosphodiesterase 1C inhibitor) + 20.5(Lipophilicity) + 0.175(NumPositive) + 0.411(Carcinogenic. rat. female. vascular system) + 0.422(Alpha 2 adrenoreceptor antagonist) + 0.571(Peroxisome proliferator-activated receptor alpha antagonist) + 0.134(Protein kinase C mu inhibitor) -0.225(Lipoprotein disorders treatment) + 0.261(HMGCS1 expression enhancer) -0.815(Dermatitis) -0.176(Male reproductive disfunction treatment) + 0.258(AMP deaminase 3 inhibitor) + 0.262(Cytokine production stimulant) -0.242(Botulin neurotoxin A light chain inhibitor) + 0.498(Dyskinesia) + 1.53(Antineoplastic (insulinoma)) + 0.582(15-Lipoxygenase 2 inhibitor) + 0.63(Ulceration) + 0.407(Chronic obstructive pulmonary disease treatment) -0.235(Glutamate (mGluR4) antagonist) -0.368(Prostaglandin EP2 agonist) -0.451(Calcium-dependent phospholipase A2 inhibitor) + 0.777(Alanine transaminase inhibitor) + 0.345(Carboxypeptidase B2 isoform A inhibitor) + 0.259(Convulsant) -0.703(Fatty liver) -0.628(Polycystin-2 inhibitor) + 0.571(Gynecological disorders treatment) -0.81(MAO A inhibitor) + 1.86(Adenosine A3 receptor antagonist) -0.389(Antineoplastic antimetabolite) -1.66(N-formylglutamate deformylase inhibitor) + 1.32((R)-aminopropanol dehydrogenase inhibitor) -0.0608(Bone diseases treatment) + 0.234(TNF expression enhancer) -0.17(THBS1 expression enhancer) -0.851(HSD17B1 expression enhancer) -0.445(TFF1 expression enhancer) + 0.0149(EGFR expression enhancer) + 1.39(Deoxyhypusine synthase inhibitor) + 0.969(MAP3K11 inhibitor) + 1.06(Phosphodiesterase VII inhibitor) + 0.356(Diplopia) -0.253(Hirsutism treatment) + 12.6(Length^3) -0.402(Cyclic AMP modulator) -0.313(CYP2E substrate) + 0.45(Inosine monophosphate dehydrogenase 1 inhibitor) -0.405(Dipeptidyl peptidase I inhibitor) + 0.246(Interleukin 1 beta converting enzyme inhibitor) -0.453(UDP-N-acetylglucosamine 1-carboxyvinyltransferase inhibitor) -0.554(Aldehyde oxidase substrate) + 1.44(Phospholipase A2 inhibitor) -0.843(Protein Wnt-2 inhibitor) + 0.546(MYC expression enhancer) -0.508(Glycosuria) -0.409(Carcinogenic. mouse) -0.41(Serine/threonine-protein kinase WEE1 inhibitor) -0.571(Amyotrophic lateral sclerosis treatment) -0.218(Analgesic. opioid) -0.376(CYP3A4 inducer) -18.1(Volume^2) + 0.481(GSTP1 expression enhancer) + 0.295(Antidepressant) + 0.459(Oxytocic) + 1.43(Ether-a-go-go potassium channel 1 blocker) -0.198(Mineralocorticoid antagonist) -0.0925(cAMP-dependent protein kinase type II-beta regulatory subunit inhibitor) + 0.753(Glyceraldehyde-3-phosphate dehydrogenase (phosphorylating) inhibitor) -0.696(Cholesterol absorption inhibitor) + 0.999(2-Aminohexano-6-lactam racemase inhibitor) -0.382(Sigma 1 receptor antagonist) -0.895(TP73 expression enhancer) -0.98(L-Serine ammonia-lyase inhibitor) -0.304(Trans-octaprenyltranstransferase inhibitor) -0.196(RNA directed DNA polymerase inhibitor) + 8.51(Volume) + 0.993(Somatostatin 5 antagonist) -0.611(Histidine decarboxylase inhibitor) + 0.556(Morphine 6-dehydrogenase inhibitor) + 0.426(Cholinergic) + 0.615(MMP2 expression inhibitor) + 0.594(Tyrosine phenol-lyase inhibitor) + 1.07(Arachidonic acid antagonist) -0.157(Antiallergic) -0.822(Cholesterol esterase inhibitor) + 0.243(Phosphodiesterase XI inhibitor) + 0.227(Urticaria) -0.192(Polyadenylate-binding protein 1 inhibitor) + 0.354(Neurokinin 3 antagonist) + 0.397(BCL2 expression inhibitor) + 0.731(JNK mitogen-activated protein kinase inhibitor) + 0.178(Factor XII inhibitor) + 0.119(MW) -0.787(Melatonin 5 antagonist) -0.591(Glyoxylate reductase (NADP+) inhibitor) -0.186(EIF5A expression inhibitor) -0.513(Androgen antagonist) -0.195(Prostate cancer treatment) -0.0967(Growth stimulant) + 0.465(Saluretic) -0.615(Histamine H2 receptor agonist) -0.806(Lysophosphatidic acid receptor antagonist) -0.158(Presenilin 1 inhibitor) -1.02(Rhodopsin kinase inhibitor) -0.201(Purinergic receptor antagonist) -0.786(Dihydropyrimidinase inhibitor) + 0.23(Caspase 9 inhibitor) + 0.218(GDPD3 expression enhancer) + 0.237(Carcinogenic. breast) + 0.484(Galactose oxidase inhibitor) -0.127(MAP kinase 11 inhibitor) + 0.331(Carcinogenic. rat. male. all tumor bearing animals) + 0.213(Integrin alpha4beta1 antagonist) -0.513(Psychosexual dysfunction treatment) + 0.161(Src kinase inhibitor) + 0.891(Neurolysin inhibitor) -0.476(Gastrointestinal hemorrhage) + 0.208(Purinergic P2X1 antagonist) -0.213(24-sterol C-methyltransferase inhibitor) -0.354(Hypercholesterolemic) + 0.228(Antiseborrheic) + 0.28(Paranoia) -0.576(Heat shock protein 90 beta antagonist) + 0.199(Arylformamidase inhibitor) + 0.166(Trypsin III inhibitor) -0.179(Heme oxygenase stimulant) -0.157(Melatonin antagonist) -0.54(Photinus-luciferin 4-monooxygenase (ATP-hydrolysing) inhibitor) + 0.847(Progesterone receptor A antagonist) -0.139(I kappa B kinase 1 inhibitor) + 0.195(Alpha 2c adrenoreceptor agonist) + 0.286(Beta adrenoreceptor antagonist) -0.0761(Pulmonary hypertension treatment) -0.307(Eye irritation. inactive) + 0.16(Estrogen-related receptor beta antagonist) + 1.05(3-Hydroxyanthranilate 3.4-dioxygenase inhibitor) -0.466(DDIT4 expression enhancer) + 0.379(UGT2B17 substrate) + 0.278(Necrosis) -0.202(Antisecretoric) -0.47(Amylo-alpha-1.6-glucosidase inhibitor) + 0.278(Anemia) + 0.115(Septic shock treatment) -0.155(Antiviral (Hepatitis)) -0.19(5 Hydroxytryptamine 1F agonist) + 0.252(D-lactaldehyde dehydrogenase inhibitor) -0.817(Andropause treatment) -0.595(Anesthetic inhalation) -0.183(Hemozoin inhibitor) -0.416(PPARG expression enhancer) + 0.381(Corticotropin releasing factor 1 receptor antagonist) + 0.117(Integrin alphaLbeta2 antagonist) + 0.126(CYP3A5 expression enhancer) -0.114(Protein-tyrosine kinase (PTK. not ETK. WZC) inhibitor) + 0.424(Formate-dihydrofolate ligase inhibitor) + 0.858(Fatty acid binding protein adipocyte inhibitor) + 0.151(Luteinizing hormone-releasing hormone antagonist) + 0.239(Headache) + 0.262(Carcinogenic. rat. female. urinary bladder) + 0.926(CYP27A substrate) -0.392(DNA-(apurinic or apyrimidinic site) lyase inhibitor) -0.233(Integrin beta3 antagonist) -0.373(Immunoglobulin E antagonist) + 0.208(Neurotoxic) + 0.511(Antiviral (CMV)) -0.112(Calcium-sensing receptor antagonist) -0.57(Aldose reductase 2 inhibitor) -0.19(Prostacyclin antagonist) + 0.0794(Transcription factor STAT1 inhibitor) + 0.138(Caspase 7 inhibitor) -0.186(Hypertensive) + 0.327(Hypocalcaemic) -0.358(Potassium channel (Ca-activated) activator) + 0.369(Secretase beta inhibitor) + 0.447(CYP1B1 expression enhancer) -0.469(G0S2 expression enhancer) -0.531(Asparagine synthase (glutamine-hydrolysing) inhibitor) + 0.154(Factor V inhibitor) -0.186(CYP2B1 substrate) -0.199(Calpain 2 inhibitor) + 0.201(Plasminogen activator inhibitor antagonist) + 0.554(Glutathione S-transferase P1 inhibitor) + 0.492(Trypsin inhibitor) + 0.199(Beta glucosidase inhibitor) -0.34(3-Oxoacyl-[acyl-carrier-protein] synthase inhibitor) -0.387(Histone deacetylase 9 inhibitor) -0.148(NADPH oxidase 4 inhibitor) + 0.508(Glycerol kinase inhibitor) -0.367(Alpha 2 adrenoreceptor agonist) + 0.319(Anthranilate 3-monooxygenase (deaminating) inhibitor) -0.623(Histone-lysine N-methyltransferase. H3 lysine-9 specific 3 inhibitor) -0.155(Sodium/hydrogen exchanger 2 inhibitor) -0.658(Aminopeptidase I inhibitor) -0.192(p38 MAP kinase inhibitor) + 0.28(CNS active muscle relaxant) + 0.162(NUPR1 expression enhancer) -0.264(Cerebral hemorrhage) + 0.116(Cannabinoid CB2 receptor agonist) + 0.346(Alkaline phosphatase inhibitor) -0.0924(Farnesyltransferase. putative inhibitor) + 0.119(Farnesyltransferase inhibitor) -0.189(Choreoathetosis) -0.873(Chalcone isomerase inhibitor) -0.133(T cell receptor gamma-delta antagonist) + 0.287(Prephenate dehydrogenase inhibitor) + 0.0927(Dual specificity phosphatase 1 inhibitor) + 0.18(CYP2C18 substrate) -0.0977(HIV-1 integrase inhibitor) + 0.565(Phosphoglucomutase inhibitor) + 0.259(Piloerection) -0.113(Antipsychotic) -0.132(Adenosine uptake inhibitor) -0.214(Bradykinin antagonist) + 0.103(Ca2+/calmodulin-dependent kinase I inhibitor) -0.18(Cystic fibrosis treatment) + 0.22(Kinesin-like protein 1 inhibitor) -0.248(L-amino-acid oxidase inhibitor) -0.0805(Prostate disorders treatment) -0.456(Adenylylsulphatase inhibitor) + 0.125(Melanocortin antagonist) -0.083(Angiotensin-converting enzyme 2 inhibitor) -0.0661(Antiarrhythmic) -0.253(Agaritine gamma-glutamyltransferase inhibitor) -0.286(Erythropoietin receptor agonist) + 0.115(Aconitate hydratase inhibitor) -0.212(CCNE1 expression inhibitor) -0.245(AREG expression enhancer) -0.115(Growth hormone release inhibitor) -0.233(Propanediol dehydratase inhibitor) -0.297(Cyclin D2 inhibitor) + 0.171(Inotropic) -0.0797(Tyrosine kinase non-receptor protein 2 inhibitor) + 0.22(Envelysin inhibitor) + 0.0829(AMPA receptor agonist) + 0.184(Formate dehydrogenase inhibitor) -0.243(Prostaglandin EP3 antagonist) -0.28(Cysteine dioxygenase inhibitor) + 0.0843(Antineurogenic pain) + 0.033(Apoptosis agonist) + 0.229(Purinergic P2X2 antagonist) -0.269(Secreted frizzled-related protein 1 inhibitor) + 0.42(N-acylneuraminate cytidylyltransferase inhibitor) -0.0656(Antibiotic Penem-like) + 0.16(Intermittent claudication treatment) -0.182(Alpha 1a adrenoreceptor antagonist) + 0.29(2-(acetamidomethylene)succinate hydrolase inhibitor) -0.0923(Parkinsonism) -0.182(Potassium channel small-conductance Ca-activated blocker) -0.194(Cyclooxygenase substrate) + 0.0435(DNA polymerase I inhibitor) -0.0879(Antiprotozoal (Amoeba)) -0.0928(CDK2/cyclin E inhibitor) + 0.168(Guanidinoacetate kinase inhibitor) + 0.194(5 Hydroxytryptamine 3A antagonist) + 0.205(Apolipoprotein A inhibitor) + 0.156(Dopamine D2S antagonist) + 0.0561(ESR2 expression inhibitor) + 0.223(Formyl peptide receptor antagonist) -0.0776(Phospholipase A2 X inhibitor) -0.0105(NumNegative) -0.139(MO15-related protein kinase Pfmrk inhibitor) -0.0676(Vitamin D receptor antagonist) -0.0534(Matrix metalloproteinase inhibitor) + 0.342(Steroid sulfotransferase inhibitor) -0.29(Cyclomaltodextrin glucanotransferase inhibitor) + 0.0491([glutamate-ammonia-ligase] adenylyltransferase inhibitor) + 0.0593(Ca2+/calmodulin-dependent protein kinase inhibitor) -0.149(ATP phosphoribosyltransferase inhibitor) -0.173(UDP-glucuronate decarboxylase inhibitor) -0.0549(Cyclin-dependent kinase 6 inhibitor) + 0.0331(Antiviral (HIV)) -0.0455(Sigma 1 receptor agonist) -0.0852(Immunostimulant) + 0.197(Activating transcription factor 1 inhibitor) -0.0885(AKR1C2 expression enhancer) -0.151(Vascular adhesion protein 1 inhibitor) + 0.0831(Antiprotozoal (Leishmania)) + 0.0505(Protein kinase (CK1) inhibitor) + 0.0372(M18 aspartyl aminopeptidase inhibitor) + 0.114(Shock treatment) + 0.0667(Prostaglandin E2 agonist) -0.0549(Dopamine transporter inhibitor) + 0.0424(Fusion protein inhibitor) + 0.103(CAT expression inhibitor) + 0.0472(Rho-associated kinase I inhibitor) -0.0524(Oxidoreductase inhibitor) + 0.092(Alcohol dehydrogenase [NAD(P)+] inhibitor) -0.0351(Neurotrophic factor) + 0.0279(Interleukin antagonist) -0.0359(Kainate receptor 2 antagonist) -0.0422(Proto-oncogene tyrosine-protein kinase Kit inhibitor) -0.187(Adenine phosphoribosyltransferase inhibitor) + 0.0362(Leukotriene E4 antagonist) -0.0617(Peroxisome proliferator-activated receptor delta antagonist) + 0.0545(Laryngospasm) -0.0491(SCD expression enhancer) + 0.157(CDP-diacylglycerol-inositol 3-phosphatidyltransferase inhibitor) + 0.0267(Dyspepsia treatment) -0.0346(Euphoria) -0.0233(Glycine-tRNA ligase inhibitor) -0.0321(Glycine transporter 1 inhibitor) + 0.036(Confusion) -0.142(Cellulose synthase (UDP-forming) inhibitor) + 0.0255(Glyceraldehyde-3-phosphate dehydrogenase inhibitor) -0.0486(Scytalone dehydratase inhibitor) -0.0307(Smo receptor antagonist) + 0.065(Ferredoxin-nitrite reductase inhibitor) + 0.025(Histone deacetylase 6 inhibitor) + 0.0795(Nicotinic receptor alpha7 subunit antagonist) + 0.078(Cathepsin E inhibitor) + 0.0186(ErbB-1 antagonist) -0.0331(Caspase 3 stimulant) -0.0168(5 Hydroxytryptamine 4E antagonist) + 0.0349(Carcinogenic. mouse. female. ovary) -0.0167(Apolipoprotein B-100 inhibitor) -0.0216(Platelet growth factor antagonist) + 0.0242(Pancytopenia) + 0.0165(MAP-kinase-activated kinase inhibitor) -0.037(SKP2 expression inhibitor) + 0.0246(Nitrilase inhibitor) -0.0229(Sensitization) + 0.042(3-Hydroxybutyrate dehydrogenase inhibitor) + 0.00674(Antiprotozoal) -0.0167(Phospholipase A2 IIa inhibitor) -0.0363(Chemokine receptor agonist) + 0.0405(K(ir) 6.1 channel blocker) -0.0118(Polo-like kinase-2 inhibitor) + 0.00266(NumDonor) + 0.00951(Weakness) -0.0167(LSS expression enhancer) -0.00769(Hypotonia) + 0.00477(Phosphate transporter inhibitor) -0.012(Opioid kappa receptor antagonist) + 0.00251(Protein-tyrosine phosphatase non-receptor type 22 inhibitor) + 0.00162(Protein-glutamate methylesterase inhibitor) -0.00819([hydroxymethylglutaryl-CoA reductase (NADPH)] kinase inhibitor) -0.000403(Prokinetic) + 6.69

Model 2

-0.649(Cystathionine gamma-lyase inhibitor) + 0.369(CYP2D6 substrate) -0.782(Leukopenia) -0.204(MAP kinase kinase 2 inhibitor) + 0.154(NumAromAtoms) + 0.327(Miotic) -0.152(NumAcceptor) -0.301(Restenosis treatment) + 0.921(Anesthetic local) + 0.488(Imidazoline receptor antagonist) + 0.321(Coma) -0.752(Phosphodiesterase 1C inhibitor) -0.959(Glycerate kinase inhibitor) -0.912(CYP2C substrate) + 0.00863(Ceramidase inhibitor) + 1.83(Arachidonic acid antagonist) + 0.0962(Lipophilicity^2) -0.237(Aldose reductase substrate) + 0.206(Antineoplastic (colon cancer)) -0.676(Length) + 0.409(N-carbamoyl-L-amino-acid hydrolase inhibitor) -0.375(Orexin receptor 2 antagonist) + 0.817(Potassium channel Kv1.1 blocker) -0.0424(Melatonin 1 agonist) -0.0601(Growth stimulant) -1.1(Thiosulfate sulfurtransferase inhibitor) + 0.546(Allergic reaction) -0.206(NACHT. LRR and PYD domains-containing protein 3 inhibitor) + 0.187(NumPositive) + 17.8(Lipophilicity) -0.155(Aggrecanase 2 inhibitor) -0.365(Integrin beta3 antagonist) + 0.644(Ceramide glucosyltransferase inhibitor) + 0.0708(P3 purinoceptor-like protein antagonist) + 0.362(Carbonic anhydrase XI inhibitor) -0.837(Shal potassium channel blocker) + 10.2(Volume) + 0.392(Sirtuin 2 inhibitor) + 1.33(Ether-a-go-go potassium channel blocker) -0.169(Glycine receptor agonist) -0.254(Glutamate dehydrogenase [NAD(P)+] inhibitor) -0.413(Vitamin D receptor antagonist) -1.15(CF transmembrane conductance regulator antagonist) + 0.311(Antiviral (Influenza A)) + 0.811(Vision disturbance) -0.846(Nicotinic alpha7 receptor agonist) -1.06(Anesthetic inhalation) + 0.118(Sodium/glucose cotransporter 2 inhibitor) + 0.735(Spermicide) -0.134(Protein-tyrosine phosphatase 1B inhibitor) + 0.573(Estrogen beta receptor agonist) + 0.884(Pneumotoxic) -0.432(Endocrine disruptor) + 0.345(UGT2B11 substrate) -0.447(NGFR expression enhancer) + 0.23(Hepatic disorders treatment) -0.502(Cerebral hemorrhage) + 0.505(Peroxisome proliferator-activated receptor alpha antagonist) + 0.318(AMPA receptor agonist) + 0.304(Biliary tract disorders treatment) + 0.401(Caspase 6 inhibitor) -0.319(Agitation) + 0.503(Sulfinoalanine decarboxylase inhibitor) -0.253(CYP3A4 inducer) -0.261(Myocardial ischemia treatment) -0.434(Prostatic (benign) hyperplasia treatment) -0.338(G-protein-coupled receptor kinase inhibitor) -0.17(CDC25A inhibitor) + 0.469(MYC expression enhancer) + 0.141(Toxic. vascular) -1.14(DNA methyltransferase 3B inhibitor) + 12.5(Length^3) + 0.502(Carboxypeptidase U inhibitor) -0.164(Biphenyl-2.3-diol 1.2-dioxygenase inhibitor) -0.169(RB1 expression enhancer) -0.27(Phosphodiesterase VIII inhibitor) -0.233(Antineoplastic (small cell lung cancer)) -0.182(Tubulin agonist) + 0.249(Antiseborrheic) + 0.762(CYP2D6 inhibitor) -0.575(Dizziness) -0.589(PPARG expression enhancer) -0.125(HIV-1 protease inhibitor) + 0.275(UDP-N-acetylmuramate-L-alanine ligase inhibitor) + 0.251(HMGCS1 expression enhancer) + 0.245(DNA gyrase subunit A inhibitor) -0.448(Sialorrhea) + 1.22(Adenosine A3 receptor agonist) -0.144(Carbonic anhydrase IX inhibitor) -0.312(Homoserine kinase inhibitor) -17.6(Volume^2) + 0.321(Glucocorticoid antagonist) + 0.358(Sentrin-specific protease 6 inhibitor) -0.522(BAD expression inhibitor) + 0.613(Cytosine deaminase inhibitor) + 0.449(Vitamin K-dependent protein C inhibitor) + 0.119(MW) -0.453(Adenylate cyclase II inhibitor) -0.293(Carcinogenic. mouse. male) + 0.143(Tachycardiac) -1.36(Orotate phosphoribosyltransferase inhibitor) + 0.518(CAT expression inhibitor) -0.3(CLU expression enhancer) + 0.359(Linoleate isomerase inhibitor) + 1.8(Cytidylate kinase inhibitor) -0.418(3(or 17)beta-hydroxysteroid dehydrogenase inhibitor) -0.165(Analgesic) -0.19(CYP3A4 inhibitor) + 0.362(Eye irritation. weak) -0.303(TNF expression inhibitor) + 0.367(Cytosolic phospholipase A2 inhibitor) -0.22(HIV-1 reverse transcriptase inhibitor) + 0.292(MAP-kinase-activated kinase inhibitor) -1.32(UGT2B20 substrate) -0.419(Amino acid-polyamine-organocation (APC) transporter antagonist) -0.757(Potassium channel (Ca-activated) activator) + 0.363(CDH1 expression enhancer) + 0.544(Cyclooxygenase 1 inhibitor) -0.641(Histone deacetylase 7 inhibitor) + 1.33(Tyrosine transaminase inhibitor) -1.16(Pyruvate. phosphate dikinase inhibitor) + 0.333(Carcinogenic. rat. female. kidney) + 0.656(Adenylate cyclase V inhibitor) -0.266(Epstein-Barr nuclear antigen 1 inhibitor) + 0.811(Transcortin receptor antagonist) -0.735(G0S2 expression enhancer) + 0.122(Cardiotonic) + 0.175(Hypoventilation) -0.201(Mineralocorticoid antagonist) -0.294(Carcinogenic. rat. female) + 0.202(Urologic disorders treatment) + 0.928(CYP24 inhibitor) + 0.218(GABA C receptor antagonist) -0.171(NADPH oxidase 4 inhibitor) + 0.146(Phosphodiesterase 6A inhibitor) -0.204(Prostaglandin EP2 agonist) + 0.233(Janus tyrosine kinase 1 inhibitor) -0.0384(NumNegative) -0.137(Cyclin-dependent kinase 5 inhibitor) -0.567(Antidepressant. Imipramin-like) -0.234(Sodium/hydrogen exchanger 2 inhibitor) + 0.442(Irritation) + 0.56(Carbonic anhydrase VA inhibitor) + 0.703(SPP1 expression enhancer) -0.431(Glutathione reductase inhibitor) + 0.469(Riboflavin kinase inhibitor) -0.18(Kainate receptor 2 antagonist) -0.554(CDK/Cyclin complex inhibitor) -0.0892(Ephrin antagonist) + 0.47(Chitinase inhibitor) + 0.251(Pim-2 kinase inhibitor) + 0.338(5 Hydroxytryptamine 5 antagonist) -0.712(Dopamine D3 agonist) + 0.797(Phosphoglucomutase inhibitor) + 0.106(Microsomal triglyceride transfer protein inhibitor) + 0.33(HMGCR expression inhibitor) + 0.224(Factor XII inhibitor) + 0.288(SERPINE1 expression enhancer) -0.435(Acetoin dehydrogenase inhibitor) + 0.0992(Psychoses) + 0.173(Analeptic) -0.362(Hepatoprotectant) + 0.178(Butyrate-CoA ligase inhibitor) -0.162(Antiviral (Hepatitis C)) + 0.274(Retinoid X alpha receptor agonist) -0.243(cAMP-dependent protein kinase type II-beta regulatory subunit inhibitor) + 0.218(Respiratory failure) + 0.364(CYP1A1 expression enhancer) -0.552(Thyroid hormone agonist) + 0.17(MAP kinase kinase 7 inhibitor) -0.104(Presenilin 1 inhibitor) -0.331(Lactose synthase inhibitor) -1.09(Anabolic) + 0.183(Xanthine-like) -1.33(GMP reductase inhibitor) + 0.357(Inosine monophosphate dehydrogenase 2 inhibitor) -0.265(I kappa B kinase 1 inhibitor) + 0.398(GABA aminotransferase inhibitor) -0.589(Protein Wnt-2 inhibitor) + 0.472(Kinesin antagonist) + 0.213(Hyperglycemic) + 0.552(Pectin lyase inhibitor) -0.384(Fatty liver) -0.194(Ribosomal protein S6 kinase alpha 3 inhibitor) -0.448(UGT1A1 substrate) + 0.759(2-Isopropylmalate synthase inhibitor) + 0.341(Nitrilase inhibitor) -0.391(Aryl sulfotransferase inhibitor) -0.132(Angiotensin antagonist) + 0.39(CYP17A1 expression inhibitor) -0.311(Cholesterol esterase inhibitor) + 0.439(STC2 expression enhancer) + 0.355(Ulcer. peptic) -0.747(Polyamine biosynthesis inhibitor) + 0.145(Bombesin 3 receptor antagonist) -0.169(Raynaud's phenomenon treatment) -0.942(mRNA (guanine-N7-)-methyltransferase inhibitor) -0.329(Retinoic acid receptor antagonist) -0.211(Cyclin D3 inhibitor) -0.178(Liver fibrosis treatment) + 0.237(Growth hormone release promoting) -0.439(Alanine carboxypeptidase inhibitor) -0.397(Scytalone dehydratase inhibitor) -0.596(CYP3A inducer) + 0.9(Tetracycline antiport transporter antagonist) -0.122(GHS receptor agonist) + 0.0416(NumDonor) + 0.341(Fibrinogen receptor antagonist) -0.396(AREG expression enhancer) -0.137(T cell receptor antagonist) + 0.332(GADD45A expression enhancer) + 0.465(Formate dehydrogenase inhibitor) -0.385(Menstruation disorders treatment) -0.67(N4-(beta-N-acetylglucosaminyl)-L-asparaginase inhibitor) + 0.267(Glutamate (mGluR group I) antagonist) -0.337(CCNE1 expression inhibitor) -0.213(Renin inhibitor) -0.596(Biliverdin reductase inhibitor) + 0.149(DNA primase inhibitor) -0.132(Acetylcholine M2 receptor agonist) -0.122(Glutamate receptor agonist) + 0.439(AMP-activated protein kinase inhibitor) -0.705(Ethanolamine kinase inhibitor) + 0.297(BCL2 expression inhibitor) -0.243(NFKBIA expression enhancer) + 0.148(Attention deficit/hyperactivity disorder treatment) -0.121(D-Amino-acid oxidase inhibitor) -0.606(Thyroid hormone beta 1 antagonist) -0.128(Prokinetic) + 0.13(Interleukin 10 agonist) + 0.167(Prostaglandin EP12 antagonist) + 0.182(Anemia) + 0.462(CYP4A11 inhibitor) + 0.658(3-Hydroxyanthranilate 3.4-dioxygenase inhibitor) -0.313(DNA-(apurinic or apyrimidinic site) lyase inhibitor) + 0.285(GSTP1 expression enhancer) + 1.16(Sialidase 1 inhibitor) + 0.142(Rho-associated kinase I inhibitor) -0.158(5 Hydroxytryptamine 2C antagonist) -0.281(APAF1 expression enhancer) + 0.0989(ATPase stimulant) + 0.389(Thromboxane A2 antagonist) + 0.255(G-protein coupled receptor 35 antagonist) -0.131(Bone morphogenic protein inhibitor) -0.0935(Spasmolytic. urinary) + 0.128(HIF1A expression inhibitor) -0.747(Kainate receptor agonist) -0.146(Homoserine O-acetyltransferase inhibitor) + 0.159(Protocollagen prolyl hydroxylase inhibitor) -0.156(Nonstructural protein 1 (Influenza A) inhibitor) -0.332(Analgesic stimulant) -0.142(Glycogen phosphorylase. liver form inhibitor) -0.565(Free fatty acid receptor 1 antagonist) -0.134(Interferon inducer) + 0.412(Oxytocic) + 0.4(DNA methyltransferase I inhibitor) + 0.218(Calcium channel (voltage-sensitive) blocker) + 0.661(Procollagen-proline 3-dioxygenase inhibitor) -0.11(Cyclin H inhibitor) -0.17(Neutral endopeptidase inhibitor) -0.195(Thioredoxin reductase inhibitor) + 0.194(Alpha 2 adrenoreceptor antagonist) + 0.105(Geranylgeranyltransferase I inhibitor) -0.298(5 Hydroxytryptamine 1B antagonist) -0.126(Rotamase (FKBP12) inhibitor) -0.0848(EphA4 antagonist) -0.116(Prostacyclin antagonist) + 0.113(Phosphodiesterase 4B inhibitor) + 0.356(Granulocyte macrophage colony stimulating factor agonist) + 0.0873(Transglutaminase 2 inhibitor) -0.086(DNA intercalator) + 0.176(IL5 expression inhibitor) -0.216(LAMP3 expression inhibitor) + 0.139(N-Acetylated alpha-linked acidic dipeptidase inhibitor) + 0.243(Intermittent claudication treatment) + 0.382(Carbonic anhydrase IV inhibitor) + 0.141(Psychostimulant) + 0.143(SLC2A3 expression inhibitor) -0.181(Anesthetic) + 0.0964(Bombesin agonist) -0.115(Antiprotozoal (Amoeba)) + 0.104(Opioid kappa receptor agonist) -0.251(Hypoxia inducible factor 1 alpha inhibitor) + 0.0668(IGFBP4 expression enhancer) -0.0999(CYP2E substrate) -0.326(Histone-lysine N-methyltransferase. H3 lysine-9 specific 3 inhibitor) -0.249(Abortion inducer) -0.103(17-Beta-hydroxysteroid dehydrogenase 1 inhibitor) + 0.0596(Antiviral (HIV)) -0.146(Antitoxic) + 0.0812(Endothelin converting enzyme 1 inhibitor) -0.372(Aldehyde dehydrogenase 1A2 inhibitor) + 0.0679(3 Beta-hydroxy-delta 5-steroid dehydrogenase inhibitor) -0.0852(Dyspnea) -0.164(Phosphodiesterase 8B inhibitor) + 0.161(CYP1A inducer) + 0.566(Gentamicin 3'-N-acetyltransferase inhibitor) -0.0844(Nicotinic acid receptor 1 agonist) + 0.121(Dependence treatment) + 0.0941(DNA polymerase beta inhibitor) -0.0751(p53 inhibitor) -0.0797(Bradykinin B1 receptor antagonist) + 0.0787(Histone deacetylase 6 inhibitor) + 0.207(HSPA1B expression enhancer) -0.287(TP73 expression enhancer) -0.163(Beta adrenoreceptor agonist) -0.0881(Phosphatidylinositol 3-kinase delta inhibitor) + 0.0898(Apnea) -0.0967(Panic) -0.1(Non-steroidal antiinflammatory agent) -0.122(Subtilisin inhibitor) + 0.129(Viral entry inhibitor) + 0.227(Somatostatin 2 antagonist) -0.174(Potassium channel small-conductance Ca-activated blocker) + 0.127(2-Nitropropane dioxygenase inhibitor) + 0.062(Antibiotic Tribactam-like) -0.203(Peptidyl-prolyl cis-trans isomerase inhibitor) + 0.0551(Alpha galactosidase inhibitor) -0.0548(Hypotension) + 0.159(5 Hydroxytryptamine 3 antagonist) + 0.237(Glyceraldehyde-3-phosphate dehydrogenase (phosphorylating) inhibitor) -0.0767(Gastrin inhibitor) -0.13(Glycine hydroxymethyltransferase inhibitor) + 0.0654(Estrogen agonist) + 0.119(Sickle-cell anemia treatment) -0.0493(Protein kinase C-related protein kinase 2 inhibitor) + 0.0491(Deoxynucleoside kinase inhibitor) + 0.152(Diaminopropionate ammonia-lyase inhibitor) + 0.0581(Prolyl aminopeptidase inhibitor) -0.186(WARS expression enhancer) + 0.113(I kappa B kinase inhibitor) -0.116(Melatonin 1a antagonist) -0.0721(Myasthenia Gravis) -0.0969(Telomerase inhibitor) -0.0369(ATP citrate lysase inhibitor) -0.0632(Sphingosine 1-phosphate receptor 4 antagonist) + 0.023(Transcription factor STAT1 inhibitor) -0.0541(Carcinogenic. rat. male. pancreas) + 0.0347(L lactate dehydrogenase A4 inhibitor) -0.0803(EFNB2 expression inhibitor) + 0.02(Angiogenesis inhibitor) + 0.117(UGT2B7Y substrate) + 0.033(Integrin alphaVbeta5 antagonist) -0.0192(Transactivator transcription protein inhibitor) -0.0655(5 Hydroxytryptamine 4 antagonist) + 0.044(Neuroleptic malignant syndrome) -0.0259(Phosphodiesterase X inhibitor) + 0.0253(Eukaryotic translation initiation factor 2-alpha kinase 3 inhibitor) -0.0204(Plasminogen activator inhibitor) -0.0379(Antinaupathic) + 0.0111(Inflammatory Bowel disease treatment) + 0.0447(Monoacylglycerol lipase inhibitor) -0.0403(Renilla-luciferin 2-monooxygenase inhibitor) + 0.0341(Leukopoiesis inhibitor) -0.0407(Pregnane X receptor agonist) -0.0146(Anorexiant) + 0.0267(FOSL1 expression enhancer) -0.0523(Glutamate carboxypeptidase inhibitor) -0.0316(Oxytocin agonist) + 0.0316(Asparaginase inhibitor) -0.0288(Nuclear receptor subfamily 4. group A. member 2 agonist) + 0.00855(Cyclophilin A inhibitor) + 0.0106(5 Hydroxytryptamine 1 antagonist) -0.027(Erythropoietin receptor agonist) -0.0154(Lactate 2-monooxygenase inhibitor) + 0.00621(Neuropeptide agonist) -0.00775(ATP phosphoribosyltransferase inhibitor) -0.0108(Histone deacetylase 10 inhibitor) -0.00341(Choreoathetosis) -0.00282(Thrombocytopoiesis inhibitor) + 0.00723(Pyruvate kinase inhibitor) + 0.000904(Antineurogenic pain) + 5.67

Model 3

+ 0.769(CYP2D6 substrate) -0.144(Eosinophilia) + 0.177(NumAromAtoms) + 0.185(Guanine deaminase inhibitor) + 0.683(Butyrylcholinesterase inhibitor) -1.07(Phosphodiesterase 1C inhibitor) -0.314(Restenosis treatment) -0.149(Anesthetic) -0.121(NumAcceptor) -0.214(Beta-mannosidase inhibitor) -0.48(CYP2 substrate) + 0.741(IL4 expression enhancer) -0.111(HIV-1 integrase (3'-Processing) inhibitor) + 4.36(Length) -0.187(Tumour necrosis factor alpha antagonist) + 0.051(Alpha 1a adrenoreceptor agonist) + 0.698(Antifungal) -1.23(NRIP1 expression enhancer) -0.246(CDK2/cyclin E inhibitor) -0.498(Carcinogenic. rat. male. nasal cavity) + 0.122(Lipophilicity^2) + 0.305(K(ir) 6.1 channel blocker) -0.181(Proline racemase inhibitor) + 0.741(Peroxisome proliferator-activated receptor alpha antagonist) + 0.308(Glyceryl-ether monooxygenase inhibitor) -0.208(Antihemorrhagic) -0.268(Paraplegia) + 0.455(Rho-associated kinase inhibitor) + 0.64(Tyrosine transaminase inhibitor) + 1.54(Sodium/hydrogen exchanger 3 inhibitor) -1.2(Potassium channel (Ca-activated) activator) + 0.632(Potassium channel (Inward rectifier) 1 blocker) -0.756(Cholesterol antagonist) -0.338(Nephrotoxic) + 0.428(Corticosteroid-like) + 0.336(Apnea) + 0.245(Angiogenesis inhibitor) -0.74(Hyperthermic) + 0.348(Convulsant) -0.679(Neuronal nicotinic receptor antagonist) -0.411(Endothelin B receptor antagonist) + 1.01(FOS expression enhancer) -0.128(Hemozoin inhibitor) -0.27(Prostacyclin antagonist) -0.576(ATM kinase inhibitor) -0.0845(Sodium/hydrogen exchanger inhibitor) -1.11(N-formylglutamate deformylase inhibitor) -1.14(5 Hydroxytryptamine 2A agonist) + 0.384(CYP1A1* substrate) + 0.661(Cytokine production stimulant) + 0.244(Antibiotic Penicillin-like) + 0.128(Excitability) + 0.0998(Dual specificity phosphatase 1 inhibitor) -1.01(Oxytocin antagonist) + 0.4(Uterine relaxant) + 0.159(Antidiabetic symptomatic) + 0.592(Carbonic anhydrase VA inhibitor) -0.511(Catechol 2.3-dioxygenase inhibitor) -0.0857(Peptidyl-prolyl cis-trans isomerase FKBP4 inhibitor) -0.308(Myocardial ischemia treatment) -0.513(Ribosomal protein S6 kinase alpha 1 inhibitor) + 0.594(Phosphatidylinositol 4-kinase inhibitor) + 0.195(Integrin alpha4beta7 antagonist) -0.354(Carcinogenic. rat. male. vascular system) -11.4(Volume^2) -0.058(Growth stimulant) + 0.222(Estrogen beta receptor agonist) + 0.149(NumPositive) + 0.573(CYP1A2 expression enhancer) + 0.277(CYP11B2 inhibitor) + 0.359(Somatostatin 5 antagonist) + 0.348(Carcinogenic. rat. male. kidney) -0.219(Glutamate (mGluR4) antagonist) + 1.04(Anesthetic local) -0.836(Argininosuccinate lyase inhibitor) -0.193(CDK2 expression inhibitor) -0.461(Histone deacetylase 4 inhibitor) + 0.328(TP53 expression enhancer) -0.291(Transcription factor NF kappa B inhibitor) -0.428(Somatostatin 5 agonist) + 0.11(Topoisomerase I inhibitor) + 0.569(Ribosomal protein S6 kinase. 70-kDa inhibitor) + 9.56(Lipophilicity) + 15.7(Volume) -0.937(Lacrimal secretion stimulant) + 0.81((R)-aminopropanol dehydrogenase inhibitor) + 0.279(Psychostimulant) -0.415(Cytostatic) + 0.21(AMP deaminase 3 inhibitor) -0.26(Kinase inhibitor) -0.32(ATPase (Mitochondrial F1F0) inhibitor) -0.574(Antiviral (Poxvirus)) -0.352(Aurora kinase inhibitor) + 0.282(Protein kinase C delta inhibitor) -0.429(DNA-dependent protein kinase inhibitor) + 0.362(TH expression enhancer) + 0.321(MAP-kinase-activated kinase inhibitor) -0.29(Preterm labor treatment) + 0.465(Diabetic neuropathy treatment) -0.17(Keratoses actinic (solar) treatment) + 0.258(DNA gyrase subunit A inhibitor) + 0.51(CDKN1A expression enhancer) + 0.412(Carbonic anhydrase X inhibitor) -0.405(Cyclin D3 inhibitor) + 0.112(Adenylate cyclase VIII inhibitor) + 0.165(IFIT1 expression enhancer) + 0.376(Dyskinesia) -3(Carbonic anhydrase VI inhibitor) + 0.603(CYP2G1 substrate) -1.64(Chalcone isomerase inhibitor) -0.186(Acute neurologic disorders treatment) + 0.896(Adenosine A3 receptor antagonist) -0.858(UDP-3-O-acyl-N-acetylglucosamine deacetylase inhibitor) + 0.181(Toxic. vascular) -0.285(Neurotrophic factor) -0.193(Cyclooxygenase 3 inhibitor) -0.363(CD86 expression enhancer) -0.767(Indanol dehydrogenase inhibitor) + 0.576(Aminopeptidase N inhibitor) + 0.569(Apolipoprotein B inhibitor) + 0.523(Nucleotidyltransferase (FIV) inhibitor) + 0.719(15-Lipoxygenase inhibitor) -0.78(Chemokine receptor agonist) -0.149(Ophthalmoplegia) + 0.686(Aryl hydrocarbon receptor antagonist) -0.351(Ribosomal protein S6 kinase alpha 4 inhibitor) -0.249(Purinergic P2 antagonist) + 0.336(Inosine monophosphate dehydrogenase 1 inhibitor) + 1.86(Sialidase 1 inhibitor) -1.05(Adenylosuccinate lyase inhibitor) -0.324(Transforming growth factor antagonist) + 2.96(Carbonic anhydrase XI inhibitor) -0.141(Insulin secretagoues) -0.147(Plectin inhibitor) -0.505(Fatty liver) + 0.459(UGT2B4 substrate) + 0.581(Alanine transaminase inhibitor) + 0.244(Matrix metalloproteinase 2 (membrane-type) inhibitor) + 0.392(Choline sulfotransferase inhibitor) + 0.181(3 Beta-hydroxy-delta 5-steroid dehydrogenase inhibitor) -0.389(PCNA expression enhancer) + 0.131(Bombesin agonist) -0.548(Thrombopoietin agonist) + 0.157(Colony stimulating factor antagonist) + 0.827(Phosphoglycerate kinase inhibitor) + 0.668(Fatty acid binding protein inhibitor) -0.573(Androgen antagonist) + 0.586(Purinergic P2X2 antagonist) + 0.327(Ribosomal protein S6 kinase 2 inhibitor) + 0.24(Integrin antagonist) -0.211(CYP1A substrate) + 0.606(Pneumotoxic) -0.173(Dopamine D1B antagonist) + 0.115(Elastase 2 inhibitor) + 0.347(Calcium channel (voltage-sensitive) blocker) + 0.727(Phosphatidate cytidylyltransferase inhibitor) + 0.116(Antineoplastic (brain cancer)) + 0.723(Tetracycline antiport transporter antagonist) -0.424(Melatonin 5 antagonist) -0.192(Dopamine autoreceptor agonist) -0.298(Potassium channel intermediate-conductance Ca-activated 4 blocker) + 0.168(Biliary tract disorders treatment) -0.762(Peptidyl-prolyl cis-trans isomerase inhibitor) -0.0779(Analgesic) -0.288(Matrix metalloproteinase (membrane-type) inhibitor) -0.497(Arylamine N-Acetyltransferase substrate) + 0.217(Carcinogenic. rat. male. lung) + 0.868(HCV NS3/NS4A protease inhibitor) -0.614(Diphosphate-fructose-6-phosphate 1-phosphotransferase inhibitor) -1.31(N-acetylglucosamine kinase inhibitor) + 0.211(Interleukin 5 antagonist) -0.573(Glycerone-phosphate O-acyltransferase inhibitor) -0.446(UGT2B1 substrate) + 0.465(Alpha.alpha-trehalase inhibitor) -0.217(Atrial natriuretic peptide antagonist) + 0.199(Antidepressant) + 0.254(Weight gain) -0.383(Gastrointestinal hemorrhage) + 0.567(Acetyl-CoA C-acyltransferase inhibitor) + 0.295(Hyperglycemic) -0.17(Apical sodium codependent bile acid transporter inhibitor) + 0.229(Prolyl aminopeptidase inhibitor) + 0.137(Histone deacetylase class IIb inhibitor) -0.161(Aldose reductase substrate) + 0.589(Formyl peptide receptor antagonist) -0.449(CCND3 expression inhibitor) + 0.32(Carcinogenic. mouse. male. thyroid gland) + 0.314(NOS2 expression enhancer) + 0.162(Ca2+/calmodulin-dependent kinase II delta inhibitor) -0.346(DNA damaging) -0.772(ICAM1 expression inhibitor) -0.125(HIV attachment inhibitor) + 1.02(Procollagen-proline 3-dioxygenase inhibitor) + 0.367(Phosphoethanolamine/phosphocholine phosphatase inhibitor) + 0.648(Fibrinogen gamma chain inhibitor) + 0.368(Membrane permeability enhancer) + 0.469(Antipruritic. non-allergic) + 0.201(Weight loss) -0.235(Extrapyramidal effect) -0.726(DNA methylase inhibitor) -0.238(Vitamin D receptor agonist) -0.406(CYP2B2 substrate) -0.174(DNA gyrase subunit B inhibitor) -0.855(Histone deacetylase 10 inhibitor) -0.86(3-Oxoacyl-[acyl-carrier-protein] synthase inhibitor) -0.851(UGT2B20 substrate) -0.11(Antiviral (Hepatitis C)) -1.29(Rhodopsin kinase inhibitor) + 0.246(Protein kinase (PKA. PKC. AKT. GRK. AGC-related. RSK. DBF2. SGK) inhibitor) -0.549(Kallikrein 13 inhibitor) + 0.108(Thyroid hormone alpha antagonist) -0.219(Carcinogenic. rat. female) + 0.472(Phosphodiesterase IX inhibitor) + 0.0989(Phosphodiesterase 4A inhibitor) -0.228(Sodium/hydrogen exchanger 2 inhibitor) + 0.31(MAO B substrate) + 0.53(Peptidyl-glycinamidase inhibitor) + 0.669(AMP-activated protein kinase inhibitor) -0.301(Cyclic AMP modulator) -0.633(Dihydrodipicolinate synthase inhibitor) + 0.155(Dopamine D2A antagonist) -0.154(Angiotensin AT1 receptor antagonist) + 0.324(Ribonucleoside triphosphate reductase inhibitor) + 0.704(CYP27A substrate) -0.276(Antinephrotoxic) -0.752(Secreted frizzled-related protein 1 inhibitor) + 0.661(Prephenate dehydratase inhibitor) + 0.357(CDK4 expression inhibitor) -0.168(Prokinetic) -0.723(Melatonin 2 agonist) -0.47(Andropause treatment) -0.189(Calcium-dependent phospholipase A2 inhibitor) + 1.04(N-acylneuraminate cytidylyltransferase inhibitor) -0.409(G0S2 expression enhancer) + 0.229(MAP kinase inhibitor) + 0.725(Heat shock 70 kDa protein 1 antagonist) -0.668(Integrin alpha5beta1 antagonist) -0.215(Cyclin-dependent kinase 1 inhibitor) + 0.305(Lichenoid eruption) -0.231(Carcinogenic. mouse. male) + 0.107(Growth hormone release promoting) -0.211(Sodium channel blocker) -0.13(L lactate dehydrogenase C4 inhibitor) -0.161(Fibroblast growth factor 3 antagonist) + 0.16(Phosphodiesterase 6G inhibitor) + 0.0276(NumHal) -0.159(Protein kinase (CK1) delta inhibitor) -0.361(HSD17B1 expression enhancer) -0.233(Antibiotic) -0.197(Sirtuin 1 inhibitor) + 0.128(Integrin alpha1beta1 antagonist) + 0.385(BAX expression inhibitor) -0.11(IL12B expression inhibitor) + 0.173(Protein kinase C iota inhibitor) -0.312(Thrombin inhibitor) + 0.326(Kinesin antagonist) + 0.227(Cytochrome P450 stimulant) -0.335(Thiosulfate sulfurtransferase inhibitor) -0.319(Transcription factor AP-1 inhibitor) + 0.163(Acaricide) -0.271(Choline kinase inhibitor) + 0.209(SLC7A11 expression enhancer) + 0.313(Transcription factor NF kappa B1 inhibitor) -0.107(Retinoic acid receptor agonist) + 0.113(Protocollagen prolyl hydroxylase inhibitor) + 0.0956(Antineoplastic (testis)) -0.196(Botulin neurotoxin A light chain inhibitor) -0.117(Urinary retention) -0.0961(Phosphorylase kinase gamma subunit 1 inhibitor) + 0.205(Histone deacetylase 6 inhibitor) -0.104(Aryl-acylamidase inhibitor) + 0.152(Systemic lupus erythematosus) -0.411(Paget's disease treatment) -0.616(Amidophosphoribosyltransferase inhibitor) + 0.11(MHC Class II antagonist) -0.116(Peroxisome proliferator-activated receptor gamma agonist) -0.423(Alpha-N-acetylgalactosaminide alpha-2.6-sialyltransferase inhibitor) + 0.204(Histamine H1 receptor antagonist) + 0.305(AR expression enhancer) -0.0872(Antineoplastic (gastric cancer)) + 0.334(CC chemokine 9 receptor antagonist) + 0.267(Phospholipase A2 inhibitor) + 0.332(Adenosine A2b receptor antagonist) + 0.168(Fibrinogen receptor antagonist) -0.0899(RNA-directed RNA polymerase (Influenza A) inhibitor) + 0.145(Nitrile hydratase inhibitor) + 0.0939(Dihydrofolate reductase (Toxoplasma gondii) inhibitor) + 0.368(Acyl-CoA dehydrogenase (NADP+) inhibitor) + 0.239(Antihypotensive) + 0.31(Cathepsin E inhibitor) -0.134(Arylsulfatase inhibitor) -0.3(Procollagen glucosyltransferase inhibitor) -0.0774(p53 inhibitor) + 0.0881(Cathepsin L2 inhibitor) -0.413(Cellulose synthase (UDP-forming) inhibitor) + 0.0987(Protein-tyrosine kinase Lyn inhibitor) -0.228(Furin inhibitor) -0.069(Homoserine O-acetyltransferase inhibitor) -0.209(Dihydropteroate synthase inhibitor) + 0.242(HSPA1B expression enhancer) -0.195(Acetylcholine muscarinic agonist) + 0.198(Potassium channel (ATP-sensitive) activator) + 0.681(Glycolipid 3-alpha-mannosyltransferase inhibitor) + 0.21(SUMO-conjugating enzyme UBC9 inhibitor) + 0.0693(Purinergic P2Y1 antagonist) + 0.0837(Carcinogenic. rat. male. stomach) + 0.104(5 Hydroxytryptamine agonist) -0.224(Hypoxanthine phosphoribosyltransferase inhibitor) + 0.0936(GABA receptor agonist) + 0.212(CYP4B1 substrate) + 0.0539(Farnesyltransferase inhibitor) + 0.0661(Behavioral disturbance) + 0.0492(Troponin C inhibitor) -0.085(Membrane permeability inhibitor) + 0.141(Tyrosine-ester sulfotransferase inhibitor) -0.087(Glutamate receptor antagonist) + 0.0638(Vision disturbance) + 0.268(Guanylate kinase inhibitor) -0.0668(Panic) -0.123(Aldehyde dehydrogenase (NAD+) inhibitor) -0.0416(HIV-1 reverse transcriptase inhibitor) -0.0538(Phosphatidylinositol 3-kinase alpha inhibitor) -0.0848(Phosphorylase kinase gamma subunit 2 inhibitor) + 0.0465(Integrin alphaVbeta1 antagonist) -0.0415(Vasculitis treatment) -0.119(Chemopreventive) -0.0348(Polo-like kinase-2 inhibitor) -0.0716(Matrix metalloproteinase 3 (membrane-type) inhibitor) -0.0413(Phosphogluconate 2-dehydrogenase inhibitor) + 0.0766(Anticataract) -0.0931(Cell wall biosynthesis inhibitor) + 0.0318(Bombesin 3 receptor antagonist) + 0.0301(Adenine nucleotide translocase inhibitor) + 0.0531(Carcinogenic. rat. female. hematopoietic system) + 0.0299(Dual specificity phosphatase 3 inhibitor) + 0.0245(C10ORF10 expression enhancer) + 0.14(Opioid kappa 2 receptor antagonist) -0.117(Nicotinic receptor gamma subunit antagonist) + 0.033(Protein kinase B inhibitor) -0.0518(Sphingosine 1-phosphate receptor antagonist) -0.0312(Methionyl aminopeptidase 2 inhibitor) + 0.106(Cytochrome oxidase inhibitor) -0.0385(Dystonia) + 0.0321(Proteasome subunit beta type-5 inhibitor) -0.134(S-adenosyl-L-homocysteine hydrolase inhibitor) + 0.0279(Phosphoglycerate kinase 2 inhibitor) + 0.0238(Lipoxin receptor agonist) + 0.0955(Tripeptidyl peptidase II inhibitor) -0.0976(Alanine carboxypeptidase inhibitor) + 0.089(2-Acylglycerol O-acyltransferase inhibitor) + 0.0876(Apolipoprotein A inhibitor) -0.0528(Bradykinin antagonist) -0.0176(TRPA1 antagonist) + 0.0793(Collagenase inhibitor) + 0.0457(Phenylalanine 4-hydroxylase inhibitor) + 0.0202(Opioid mu 1 receptor antagonist) -0.0167(Fatty acid elongase inhibitor) + 0.017(Elastase 3A inhibitor) -0.0462(Glutamate (mGluR5) agonist) + 0.059(Malonyl-CoA decarboxylase inhibitor) -0.0189(Hypotonia) -0.0783(Polynucleotide adenylyltransferase inhibitor) + 0.0359(SELENBP1 expression inhibitor) -0.0287(Carcinogenic. rat. male. peritoneal cavity) + 0.042(Antiviral (CMV)) -0.0136(Cholecystokinin A antagonist) -0.0613(UDP-glucuronosyltransferase 2B7 inhibitor) -0.0191(ATF3 expression enhancer) + 0.0116(Antineurogenic pain) -0.0381(Nicotinic receptor alpha9 subunit antagonist) -0.0101(Opioid mu receptor antagonist) -0.00521(Kainate receptor 2 antagonist) + 0.00451(Trypsin I inhibitor) -0.00278(Prostate cancer treatment) + 0.000924(NumDonor) -0.00253(5 Hydroxytryptamine 1A antagonist) -0.0115(Carbonic anhydrase XIII inhibitor) + 0.00156(Phospho-N-acetylmuramoyl-pentapeptide-transferase inhibitor) + 0.00417(Beta lactamase TEM-1 inhibitor) + 0.00249(Corticotropin releasing factor 1 receptor antagonist) + 0.000353(Headache) -0.000276(Kainate receptor 4 antagonist) + 6.65

Model 4

+ 0.597(CYP2D6 substrate) -0.64(Cytosol alanyl aminopeptidase inhibitor) -0.0241(MAP kinase kinase 2 inhibitor) + 0.156(NumAromAtoms) -0.678(Neutropenia) + 0.261(Hypothermic) -0.0105(Envelope glycoprotein gp160 inhibitor) + 0.567(Gynecological disorders treatment) -0.233(Aggrecanase inhibitor) + 0.109(MHC Class II antagonist) + 0.408(Arrhythmogenic) + 0.0118(Potassium channel small-conductance Ca-activated 3 blocker) -0.303(Dextransucrase inhibitor) -0.0906(Platelet antagonist) + 0.405(Antibiotic Cephalosporin-like) -0.478(Serine/threonine-protein kinase WEE1 inhibitor) -11.7(Volume^2) -1.58(Length) -0.502(Beta lactamase inhibitor) -0.0174(Amyloid beta precursor protein antagonist) + 0.496(NOS2 expression enhancer) + 0.937(Alpha-L-fucosidase inhibitor) -0.937(Lysozyme inhibitor) -0.81(CYP2C substrate) + 0.192(T cell inhibitor) + 26.7(Lipophilicity) + 0.127(Opioid dependency treatment) -1.2(Beta 2 adrenoreceptor agonist) + 0.582(Carbonic anhydrase X inhibitor) + 0.225(Coma) -0.257(Carcinogenic) -0.569(Tyrosine-protein kinase TXK inhibitor) -0.427(Cystic fibrosis treatment) -0.392(Prostate disorders treatment) + 0.368(HMGCS1 expression enhancer) -0.44(Phosphodiesterase 8B inhibitor) + 0.0298(Purine biosynthesis inhibitor) + 0.211(Chronic obstructive pulmonary disease treatment) + 0.572(S-adenosyl-L-methionine decarboxylase inhibitor) + 24.9(Length^3) + 0.588(MYC expression enhancer) + 0.272(Deoxynucleoside kinase inhibitor) + 14.5(Volume) + 0.256(Fasciculation) -0.133(Withdrawal) -0.506(Glutathione S-transferase substrate) -0.184(Analgesic) -1.58(5-Formyltetrahydrofolate cyclo-ligase inhibitor) + 0.331(Periodontitis treatment) + 0.163(Ribosomal protein S6 kinase inhibitor) + 0.494(Hypolipemic) -0.665(Antidepressant. Imipramin-like) -0.171(Microtubule stabilization) + 1.54(Tyrosine transaminase inhibitor) -0.32(Neurotrophic factor) -0.534(Hyperthermic) -0.349(Hexokinase stimulant) + 0.666(Phosphatidylcholine-sterol O-acyltransferase inhibitor) -0.218(CDK4/cyclin D1 inhibitor) + 0.0699(Caspase 6 inhibitor) -0.258(Acute neurologic disorders treatment) -0.297(Carbonic anhydrase II stimulant) + 0.918(Ethanolaminephosphotransferase inhibitor) -0.793(3-Dehydroquinate synthase inhibitor) -0.269(Diacylglycerol cholinephosphotransferase inhibitor) -0.777(ICAM1 expression inhibitor) + 0.55(Antiviral (Adenovirus)) -0.667(EDN1 expression enhancer) + 0.15(Integrin alpha1beta1 antagonist) -4.43(Volume^3) + 0.152(CYP1B1 substrate) + 0.205(Antifungal enhancer) + 1.52(Sodium/hydrogen exchanger 3 inhibitor) -0.967(Histone deacetylase class IV inhibitor) -0.539(Arylamine N-Acetyltransferase substrate) + 0.275(Phosphate transporter inhibitor) + 0.367(Matrix metalloproteinase 4 (membrane-type) inhibitor) -0.392(Pyruvate dehydrogenase kinase 1 inhibitor) + 0.673(IL4 expression enhancer) + 0.179(Anticataract) -0.916(Glutamate (mGluR6) antagonist) + 0.842(Pyruvate dehydrogenase kinase 3 inhibitor) -0.328(11-Beta-hydroxysteroid dehydrogenase 1 inhibitor) -0.0228(Macrophage elastase inhibitor) -0.255(SLC7A5 expression enhancer) -0.000234(Lipophilicity^3) + 0.184(Analgesic. non-opioid) + 0.161(Ca2+/calmodulin-dependent protein kinase inhibitor) + 0.465(Diabetic neuropathy treatment) + 0.307(AMP deaminase 3 inhibitor) -1.28(GMP synthase inhibitor) + 0.175(Hypercalcaemic) -0.277(Prostaglandin-E2 synthase 1 inhibitor) + 0.56(Alanine transaminase inhibitor) + 0.943(Peptide deformylase inhibitor) -0.689(Indanol dehydrogenase inhibitor) + 0.699(Inosine monophosphate dehydrogenase 2 inhibitor) + 0.311(Cyclin-dependent kinase 7 inhibitor) + 0.558(Peroxisome proliferator-activated receptor alpha agonist) + 0.31(Neurotoxic) -0.269(Epstein-Barr nuclear antigen 1 inhibitor) + 0.224(Anxiolytic) -0.612(Lacrimal secretion stimulant) -0.182(CDK1/cyclin B inhibitor) + 0.266(Respiratory analeptic) + 0.103(NumPositive) -0.13(Antiviral (Rhinovirus)) -0.29(Alpha 1 adrenoreceptor agonist) + 1.07(2-(acetamidomethylene)succinate hydrolase inhibitor) -0.222(Hyperkinesia) + 1.14(Cathepsin D inhibitor) + 0.307(cAMP-dependent protein kinase alpha catalytic subunit inhibitor) + 0.752(UGT2B7 substrate) + 0.174(Glutamate (mGluR group III) agonist) -0.681(Thromboxane synthase inhibitor) -0.285(Keratoses actinic (solar) treatment) + 0.658(NAD(P)+ transhydrogenase (AB-specific) inhibitor) + 0.464(Ulceration) + 0.253(Enoyl-[acyl-carrier-protein] reductase (NADH) inhibitor) -0.335(MAP kinase 12 inhibitor) -0.639(Excitatory amino acid transporter 3 inhibitor) -0.512(MAO A inhibitor) + 0.24(Sucrase-isomaltase inhibitor) -0.505(Histidine decarboxylase inhibitor) -0.291(Glutamate (mGluR4) antagonist) + 0.422(Carcinogenic. rat. male. stomach) + 0.367(GSTP1 expression enhancer) -0.866(Inositol-3-phosphate synthase inhibitor) -0.254(Protein kinase C beta II inhibitor) + 0.344(Peroxisome proliferator-activated receptor alpha antagonist) + 1.12(Riboflavin synthase inhibitor) + 0.899(Ether-a-go-go potassium channel 1 blocker) -0.356(DDIT3 expression enhancer) + 0.212(PDCD4 expression enhancer) -0.685(PPARG expression enhancer) -0.254(Prokinetic) + 0.265(Integrin antagonist) + 0.256(Protein kinase B gamma inhibitor) -0.617(Elastase inhibitor) -0.195(Purinergic receptor antagonist) -0.0792(Estrogen antagonist) -0.308(Endothelin receptor antagonist) + 0.303(Rho-associated kinase inhibitor) + 0.561(Caspase 3 inhibitor) + 0.296(Serine carboxypeptidase inhibitor) + 0.329(Irritation) + 0.197(Immunosuppressant) -0.321(Aurora-B kinase inhibitor) + 0.108(Phosphodiesterase 6G inhibitor) + 0.165(FABP1 expression enhancer) -0.24(Calcium-dependent phospholipase A2 inhibitor) -0.414(NOS2 expression inhibitor) + 0.106(Lipophilicity^2) -0.846(Hair growth stimulant) -0.375(SCD expression enhancer) -0.568(Vascular adhesion protein 1 inhibitor) + 0.357(Neurokinin antagonist) + 0.283(Signal transduction pathways inhibitor) + 0.87(Alpha.alpha-trehalase inhibitor) -0.19(Thymidine kinase 2 inhibitor) -0.216(Tubulin agonist) -0.554(Glutathione reductase stimulant) + 0.352(Clk dual-specificity kinase inhibitor) -0.529(Metalloproteinase-3 inhibitor) + 0.404(MMP2 expression inhibitor) -0.751(Glyoxylate reductase (NADP+) inhibitor) + 0.162(Purinergic P2X1 antagonist) -0.11(Antineoplastic (lung cancer)) -0.599(Glutathione reductase inhibitor) -0.539(CA2 expression enhancer) + 0.449(Carboxylesterase inhibitor) -0.314(Acylphosphatase inhibitor) + 1.26(Neuraminidase inhibitor) -0.134(CYP2C9 inhibitor) -0.636(Dopamine D3 agonist) -0.0805(GST P substrate) + 0.45(CYP19A1 expression inhibitor) -0.132(Dihydroorotase inhibitor) + 0.26(Excitatory amino acid transporter 1 inhibitor) -0.194(Premenstrual syndrome treatment) -0.756(UGT1A3 substrate) + 0.308(ALK inhibitor) + 0.716(TH expression enhancer) + 0.175(Excitability) + 0.4(CDKN1C expression enhancer) + 0.629(Antibiotic Carbapenem-like) + 0.475(GABA A receptor agonist) -0.0535(NumAcceptor) -0.198(Glycogen phosphorylase. liver form inhibitor) -0.206(Neuropeptide FF1 antagonist) + 0.723(Dihydrofolate reductase (Mycobacterium avium) inhibitor) -0.236(Aminopeptidase A inhibitor) -0.631(Neuronal nicotinic receptor antagonist) + 0.0828(Follicle-stimulating hormone agonist) -0.645(Cellulose synthase (UDP-forming) inhibitor) + 1.64(N-acylneuraminate cytidylyltransferase inhibitor) -0.611(5 Hydroxytryptamine 4 antagonist) + 0.147(Cannabinoid CB2 receptor antagonist) -0.956(Fructokinase inhibitor) -0.255(Nerve growth factor antagonist) -0.304(Cerebral hemorrhage) -0.26(Carcinogenic. mouse. male. stomach) + 0.313(Antinephritic) -0.477(UDP-N-acetylglucosamine 1-carboxyvinyltransferase inhibitor) -0.269(Cyclin-dependent kinase 1 inhibitor) + 0.238(CYP2G1 substrate) -0.116(Nitric oxide antagonist) + 0.411(Nicotinic receptor alpha7 subunit antagonist) + 0.385(Phosphodiesterase VII inhibitor) -0.374(Analgesic stimulant) -0.0928(AXL receptor tyrosine kinase inhibitor) -0.296(Amyotrophic lateral sclerosis treatment) + 0.195(Interstitial nephritis) + 0.317(IL1A expression enhancer) + 0.214(Phosphodiesterase 6D inhibitor) + 0.244(Fibrinogen receptor antagonist) + 0.35(SERPINE1 expression enhancer) -0.128(Prostacyclin antagonist) + 0.541(Thromboxane antagonist) -0.124(Analgesic. opioid) + 0.571(Formyl peptide receptor 1 antagonist) -0.307(CCNE1 expression inhibitor) -1.08(Beta-1.4-mannosyl-glycoprotein 4-beta-N-acetylglucosaminyltransferase inhibitor) + 0.347(BAK1 expression enhancer) + 0.161(Caspase 7 inhibitor) -0.179(Collagenase 3 inhibitor) -0.142(Phosphorylase kinase gamma subunit 1 inhibitor) -9.26(Length^2) + 0.117(Antineoplastic (endocrine cancer)) -0.249(EREG expression enhancer) + 0.247(CDKN1A expression enhancer) -0.322(MAP3K8 inhibitor) -0.329(Sonic hedgehog protein inhibitor) + 0.189(Nitrile hydratase inhibitor) + 0.106(Mineralocorticoid) -0.418(Histamine H2 receptor agonist) -0.21(Atrial natriuretic peptide antagonist) + 0.173(CYR61 expression enhancer) -0.229(Hypercholesterolemic) + 0.0977(Pyrimidine antagonist) + 0.495(Cytosine deaminase inhibitor) -0.418(ARHGDIA expression inhibitor) -0.325(CDC25C inhibitor) + 0.17(CYP2C19 inhibitor) -0.166(CLU expression enhancer) + 0.115(Proto-oncogene tyrosine-protein kinase Fgr inhibitor) -0.278(Mannose-6-phosphate isomerase inhibitor) -0.13(Polo-like kinase-2 inhibitor) -0.122(Vascular endothelial growth factor 3 antagonist) -0.373(Antimetabolite) + 0.0912(Baculoviral IAP repeat-containing protein 3 inhibitor) -0.13(Antidiuretic hormone agonist) -0.0805(Nucleoside transporters inhibitor) -0.0187(NumNegative) + 0.342(Urotensin II agonist) -0.108(CYP11A1 inhibitor) + 0.256(Hirsutism) + 0.131(Thyroid hormone alpha antagonist) -0.108(Peripheral neuropathy) -0.281(UGT1A1 substrate) -0.248(Thioredoxin reductase inhibitor) -0.13(Non-steroidal antiinflammatory agent) + 0.0421(MW) + 0.0857(Cystinyl aminopeptidase inhibitor) -0.0934(Nephrotoxic) -0.19(Catechol 2.3-dioxygenase inhibitor) + 0.179(Antipruritic. allergic) + 0.0858(Alpha tubulin antagonist) + 0.263(UGT2B4 substrate) + 0.169(GABA C receptor rho-1 antagonist) -0.405(Riboflavin kinase inhibitor) + 0.184(Sickle-cell anemia treatment) -0.0914(CC chemokine receptor antagonist) + 0.0883(Histone deacetylase 3 inhibitor) -0.36(Aspartate carbamoyltransferase inhibitor) + 0.0563(Geranylgeranyltransferase I inhibitor) -0.0797(Interleukin 1b antagonist) + 0.183(Imidazoline receptor antagonist) + 0.216(Tyrosine phenol-lyase inhibitor) -0.0868(Aspartate 4-decarboxylase inhibitor) -0.24(Synaptic vesicle protein SV2. levetiracetam binding site antagonist) + 0.1(Carcinogenic. rat. female. small intestine) -0.123(Cytokine production inhibitor) -0.329(Phosphogluconate dehydrogenase (decarboxylating) inhibitor) + 0.136(NADPH-ferrihemoprotein reductase inhibitor) -0.15(Orexin receptor 2 antagonist) + 0.106(CYP2D6 inhibitor) + 0.224(Phosphoglycerate dehydrogenase inhibitor) + 0.0603(Carbonic anhydrase III inhibitor) + 0.203(Human papillomavirus - 16 inhibitor) + 0.0566(Interleukin 1 antagonist) -0.0516(Presenilin 2 inhibitor) -0.0721(Carcinogenic. rat. male) -0.278(Carbonic anhydrase XIII inhibitor) -0.0623(Dopamine D1A antagonist) + 0.13(Carcinogenic. group 1) + 0.0372(Angiogenesis inhibitor) + 0.239(Glutathione S-transferase P1 inhibitor) + 0.166(Proto-oncogene protein c-fos inhibitor) -0.0322(Antineoplastic (solid tumors)) + 0.0528(MAP-kinase-activated kinase 5 inhibitor) + 0.0524(Integrin alphaLbeta2 antagonist) + 0.0728(Carcinogenic. mouse. male. thyroid gland) + 0.063(Integrin alphaVbeta6 antagonist) -0.108(Xanthine oxidase inhibitor) + 0.0493(Cytosolic phospholipase A2 delta inhibitor) -0.128(Andropause treatment) + 0.144(Nucleotidyltransferase (FIV) inhibitor) + 0.0934(Beta adrenoreceptor antagonist) + 0.025(Antineoplastic (liver cancer)) + 0.0384(5 Hydroxytryptamine 1F antagonist) -0.026(Myocardial ischemia treatment) -0.0776(Thrombin receptor antagonist) + 0.0401(Vision disturbance) -0.0809(CCNA2 expression enhancer) -0.0408(Presenilin 1 inhibitor) + 0.056(Focal adhesion kinase inhibitor) -0.0386(Antipyretic) + 0.0257(Protein-glutamate methylesterase inhibitor) + 0.111(L lactate dehydrogenase A inhibitor) -0.0356(Interleukin 1 beta converting enzyme inhibitor) -0.0916(Amylo-alpha-1.6-glucosidase inhibitor) + 0.0192(Macular degeneration treatment) + 0.0252(Cathepsin K inhibitor) + 0.0904(Melanin inhibitor) + 0.0239(Purinergic P2 agonist) -0.0821(Dihydroorotate oxidase inhibitor) -0.0332(Transforming growth factor beta antagonist) + 0.0579(Caspase 8 stimulant) -0.0308(Retinoic acid receptor antagonist) + 0.0308(Colony stimulating factor antagonist) -0.0561(Acetylcholine muscarinic agonist) + 0.0311(Integrin alpha4 antagonist) -0.021(Phosphatidylinositol 3-kinase gamma inhibitor) + 0.0287(Cytochrome P450 stimulant) -0.0402(Cathepsin S inhibitor) + 0.00318(NumHal) -0.0362(Aurora kinase inhibitor) -0.0416(5 Hydroxytryptamine 2C agonist) + 0.011(Bromodomain-containing protein 2 inhibitor) + 0.0116(Antibiotic Aminoglycoside-like) -0.0318(DOPA decarboxylase inhibitor) + 0.00924(dTMP kinase inhibitor) + 0.0145(Alcohol oxidase inhibitor) + 0.00729(GHS receptor antagonist) + 0.0136(Ecdysone 20-monooxygenase inhibitor) + 0.0137(Glutathione-disulfide reductase inhibitor) + 0.0476(Alpha-N-acetylneuraminate alpha-2.8-sialyltransferase inhibitor) + 0.00477(G-protein-coupled receptor 120 agonist) + 0.0035(K(ir) 6.2 channel activator) + 0.00448(Antibiotic Macrolide-like) -0.00337(Carcinogenic. mouse) -0.00346(Nicastrin inhibitor) -0.00349(Nav1.1 sodium channel blocker) -0.00136(MAP kinase 9 inhibitor) + 6.78

Model 5

-0.198(Dopamine D1A antagonist) -0.574(Cystathionine gamma-lyase inhibitor) -0.504(Aggrecanase inhibitor) + 0.121(NumAromAtoms) + 1.14(Calcium antagonist) + 0.526(CYP1A2 expression enhancer) -0.27(Hexokinase inhibitor) + 0.944(Carboxylesterase inhibitor) + 2.36(Methionyl aminopeptidase inhibitor) + 0.59(Carboxypeptidase B2 isoform A inhibitor) -0.204(Thrombocytopoiesis inhibitor) -0.26(DNA repair enzyme inhibitor) + 0.338(Glyceryl-ether monooxygenase inhibitor) -0.494(Endothelin receptor antagonist) -0.0609(Protein phosphatase inhibitor) -0.0266(Thromboxane synthase inhibitor) + 1.06(N-acetylglucosamine-6-phosphate deacetylase inhibitor) -1.32(Antineoplastic antimetabolite) -0.453(CDK4/cyclin D1 inhibitor) + 1.32(S-adenosyl-L-methionine decarboxylase inhibitor) -0.728(5 Hydroxytryptamine release inhibitor) + 0.59(CYP4F3 substrate) + 0.278(Integrin alphaLbeta2 antagonist) -0.118(NumAcceptor) -1.23(Glycerate kinase inhibitor) -1.34(Lacrimal secretion stimulant) -0.542(Steroid 17-alpha-hydroxylase/17.20 lyase inhibitor) -1.89(Carbonic anhydrase stimulant) + 0.438(Matrix metalloproteinase 4 (membrane-type) inhibitor) + 0.429(Estrogen beta receptor agonist) -0.000757(Lipophilicity^3) + 0.193(Antidiabetic symptomatic) + 1.21(Formyl peptide receptor 1 antagonist) + 0.238(Antiviral (Influenza)) -0.815(Length) -0.749(Histone deacetylase 7 inhibitor) -0.113(Amyloid beta precursor protein antagonist) -0.582(4-Hydroxy-2-oxoglutarate aldolase inhibitor) + 0.595(Alpha 2b adrenoreceptor agonist) -0.891(Arylamine N-Acetyltransferase substrate) + 0.585(Cholinergic) -0.797(NMDA receptor phencyclidine site antagonist) -1.77(Glyoxylate reductase (NADP+) inhibitor) + 1.82(Pyruvate dehydrogenase stimulant) + 0.185(Respiratory distress syndrome treatment) -1.77(DNA methylase inhibitor) + 0.2(FMN reductase inhibitor) + 0.508(GABA aminotransferase inhibitor) + 0.339(Carcinogenic. mouse. male. lung) -1.11(Hypoxia inducible factor 1 alpha inhibitor) + 1.33(Carbonic anhydrase XIV inhibitor) -0.35(Prostaglandin F2 alpha antagonist) + 0.151(NumPositive) + 0.497(3-Hydroxybutyrate dehydrogenase inhibitor) + 0.037(MW) + 13.1(Lipophilicity) + 0.236(Weakness) + 0.892(Phenylalanine 4-hydroxylase inhibitor) -0.548(Carcinogenic. mouse) + 0.82(Ribonucleoside triphosphate reductase inhibitor) + 0.839(Chitinase inhibitor) + 0.944(Leukotriene C antagonist) + 0.357(Alanine racemase inhibitor) -0.232(Kainate receptor 3 antagonist) + 19(Volume) + 0.7(Somatostatin 5 antagonist) -0.226(Ophthalmoplegia) -0.175(Antihypertensive) + 0.996(Phosphate acetyltransferase inhibitor) -0.219(Nucleoside transporters inhibitor) -0.375(Antiprotozoal (Amoeba)) -0.443(Metalloproteinase-3 inhibitor) + 0.444(Antihypoxic) + 1.37(Ether-a-go-go potassium channel blocker) + 0.3(JUN expression enhancer) -0.45(Antiacne) -0.834(5 Hydroxytryptamine 2A agonist) -1.11(Cholesterol esterase inhibitor) -0.319(Phosphogluconate 2-dehydrogenase inhibitor) + 0.956(Colony stimulating factor agonist) + 0.267(Sodium/glucose cotransporter 2 inhibitor) -1.01(Nicotinate phosphoribosyltransferase inhibitor) + 0.234(Biliary tract disorders treatment) + 0.339(Convulsant) + 0.427(Glyceraldehyde-3-phosphate dehydrogenase inhibitor) + 0.273(Protein kinase B stimulant) + 0.283(CDP-diacylglycerol-inositol 3-phosphatidyltransferase inhibitor) -0.646(Amylo-alpha-1.6-glucosidase inhibitor) + 0.501(Sentrin-specific protease 6 inhibitor) -0.222(Carcinogenic) + 0.244(Cathepsin L2 inhibitor) -0.248(SFN expression enhancer) -0.219(Insulin secretagoues) -0.967(Ethanolamine kinase inhibitor) -0.329(Hexokinase stimulant) -0.175(Potassium channel (Inward rectifier) 11 blocker) -0.354(Epstein-Barr nuclear antigen 1 inhibitor) + 0.251(5 Hydroxytryptamine release stimulant) + 0.228(Antibiotic Carbacephem-like) + 0.42(Postcoital contraceptive) + 0.187(Hepatic disorders treatment) -0.254(Ribosomal protein S6 kinase alpha 2 inhibitor) -0.233(Inflammation) -0.548(UGT2B1 substrate) -0.582(Uroporphyrinogen decarboxylase inhibitor) + 0.127(Antidepressant) + 0.231(Inositol 1.4.5-triphosphate receptor 1 antagonist) + 0.728(Antipruritic. non-allergic) -0.406(Hypercholesterolemic) -0.346(CCNE1 expression inhibitor) -0.334(Allergic dermatitis) -0.287(Hypomania) -0.268(Methylglyoxal synthase inhibitor) -0.194(Prolactin release inhibitor) + 0.121(FABP1 expression enhancer) + 0.614(HMGCR expression inhibitor) -0.6(Fatty acid oxidation inhibitor) + 0.0953(Guanylate cyclase stimulant) + 0.232(Trypsin III inhibitor) -1.08(Histone-lysine N-methyltransferase. H3 lysine-9 specific 3 inhibitor) -0.215(Potassium channel intermediate-conductance Ca-activated blocker) -0.16(Analgesic) -0.725(PDZK1 expression enhancer) + 0.356(Carcinogenic. rat. male. stomach) + 0.637(Formate dehydrogenase inhibitor) -0.265(Methionyl aminopeptidase 2 inhibitor) + 0.222(Estrone sulfatase inhibitor) -0.416(Cyclin-dependent kinase 1 inhibitor) + 0.297(Ulcer. gastric) + 0.189(Interleukin 5 antagonist) -1.05(Histone deacetylase 11 inhibitor) + 0.457(Corticotropin releasing factor 1 receptor antagonist) -0.542(Shal potassium channel blocker) + 0.316(Glycogen synthase kinase-3 inhibitor) -0.267(CYP2B1 substrate) -11.7(Volume^2) -0.0286(NumNegative) + 0.278(BCL2 expression inhibitor) + 0.215(5 Hydroxytryptamine agonist) -0.531(PPARG expression enhancer) + 0.372(Prostaglandin EP12 antagonist) -0.236(Antidyskinetic) -0.763(Indanol dehydrogenase inhibitor) -0.311(Sphingosine 1-phosphate receptor 1 antagonist) -0.166(Melatonin 1 antagonist) + 0.6(Diaminopropionate ammonia-lyase inhibitor) + 6.65(Length^3) + 0.286(cAMP-dependent protein kinase beta catalytic subunit inhibitor) -0.311(Adenosine uptake inhibitor) + 0.361(Membrane integrity antagonist) -0.293(Eye irritation. inactive) -0.211(Calcium channel N-type blocker) + 0.129(CYP26A1 inhibitor) + 0.201(Phosphate transporter inhibitor) + 0.245(Protocollagen prolyl hydroxylase inhibitor) -0.128(Check point kinase inhibitor) -0.133(Angiotensin antagonist) -0.448(CA2 expression enhancer) -0.223(Carbonyl reductase [NADPH] 1 inhibitor) + 0.319(Eye irritation. weak) -0.271(Neuropeptide FF1 antagonist) -0.627(Peptidyl-Lys metalloendopeptidase inhibitor) + 0.497(CYP1B substrate) + 0.134(Dystonia) + 0.17(Bronchoconstrictor) -0.166(Microtubule stabilization) + 0.147(Insulysin inhibitor) -0.389(DDIT4 expression enhancer) + 0.552(Phosphofructokinase-1 inhibitor) + 0.273(Nav1.8 sodium channel blocker) + 1.12(N-acylneuraminate cytidylyltransferase inhibitor) -0.315(Mutagenic) + 0.417(CYR61 expression enhancer) + 0.278(Anemia) + 0.23(Rho-associated kinase inhibitor) -0.19(Protein kinase C beta I inhibitor) + 0.441(Pyruvate dehydrogenase (lipoamide) inhibitor) -0.826(Dipeptidyl peptidase VI inhibitor) + 0.169(Ribosomal protein S6 kinase 2 inhibitor) + 0.178(3 Beta-hydroxy-delta 5-steroid dehydrogenase inhibitor) -0.521(Lysozyme inhibitor) -0.155(Sodium/hydrogen exchanger 2 inhibitor) + 0.244(Estrogen alpha receptor agonist) -0.221(Protein kinase (CK2) inhibitor) -0.292(Cytokine production inhibitor) + 0.746(Glutamate synthase (NADPH) inhibitor) + 0.582(Sodium/hydrogen exchanger 3 inhibitor) + 0.5(SERPINE1 expression enhancer) -0.214(Homoserine O-acetyltransferase inhibitor) + 0.213(Mucositis treatment) -0.392(Fibromyalgia syndrome treatment) + 0.549(Phosphomannomutase 2 inhibitor) -0.573(Alpha 2 adrenoreceptor agonist) -0.372(GABA transporter inhibitor) + 0.192(MAP kinase inhibitor) -0.678(NADH dehydrogenase inhibitor) -0.406(EDN1 expression enhancer) -0.853(Asparagine synthase (glutamine-hydrolysing) inhibitor) + 0.521(Adenylate cyclase V inhibitor) + 0.206(Liver X receptor agonist) -0.411(MO15-related protein kinase Pfmrk inhibitor) -0.109(Cyclin-dependent kinase 5 activator 1 inhibitor) -0.112(Thymidine kinase 2 inhibitor) -0.118(Estrogen antagonist) -0.552(Sigma 2 receptor antagonist) + 0.538(Gastricsin inhibitor) -0.227(Hyperkinesia) + 0.0575(Troponin C inhibitor) -0.125(Keratolytic) + 0.299(Contraceptive female) -0.343(Antileprosy) + 0.188(Mucomembranous protector) + 0.265(Mood disorders treatment) -1.2(Ribose-phosphate diphosphokinase inhibitor) + 0.348(N-hydroxyarylamine O-acetyltransferase inhibitor) + 0.142(TRKA antagonist) + 0.113(Opioid agonist) + 0.0915(Chloride channel blocker) -0.53(Oxaloacetate tautomerase inhibitor) -0.15(Estradiol 17 beta dehydrogenase 2 inhibitor) + 0.221(Carcinogenic. rat. male. urinary bladder) + 0.153(Janus tyrosine kinase 1 inhibitor) -0.231(AKR1C1 expression enhancer) -0.321(Glutathione reductase inhibitor) + 0.55(Histone deacetylase 1 inhibitor) + 0.291(Hypertensive. ophthalmic) -0.13(cAMP-dependent protein kinase type II-beta regulatory subunit inhibitor) + 0.149(Smooth muscle myosin light chain kinase inhibitor) + 0.347(TXNRD1 expression enhancer) -0.678(CYP24 substrate) -0.3(P-glycoprotein 1 inhibitor) + 0.14(Troponin T. cardiac muscle inhibitor) -0.149(HSPA8 expression inhibitor) -0.277(Protein kinase (CaMK. MLCK. PhK. SNF. KIN. NIM1. MAPKAP. POLO. CHK. ULK. RSK-2nd domain) inhibitor) -0.11(BRCA1 expression enhancer) + 0.208(N-carbamoyl-L-amino-acid hydrolase inhibitor) + 0.125(dTMP kinase inhibitor) + 0.298(Kinesin antagonist) + 0.555(Cyclohexadienyl dehydrogenase inhibitor) -0.183(Glycogen synthase kinase-3 alpha inhibitor) -0.318(Erythropoietin receptor agonist) -0.466(3-Oxoacyl-[acyl-carrier-protein] synthase inhibitor) -0.269(Protein-S-isoprenylcysteine O-methyltransferase inhibitor) + 0.521(Aralkylamine N-acetyltransferase inhibitor) -0.131(Phosphatidylinositol 3-kinase alpha inhibitor) + 0.268(JNK mitogen-activated protein kinase inhibitor) + 0.0598(Dry eye) + 0.119(Diarrhea) + 0.0974(Multidrug resistance-associated protein 1 inhibitor) -0.097(CYP11A1 inhibitor) + 0.312(CYP4 substrate) + 0.75(CYP27 substrate) + 0.468(Urotensin II agonist) -0.118(T cell receptor antagonist) -0.0565(Antiallergic) -0.103(Potassium channel small-conductance Ca-activated 3 blocker) + 0.3(Adenosine A2b receptor antagonist) + 0.213(NUPR1 expression enhancer) + 0.14(Chorea) -0.237(Cyclooxygenase inhibitor) -0.175(SCD expression enhancer) + 0.145(UDP-N-acetylmuramate-L-alanine ligase inhibitor) -0.101(Prostatic (benign) hyperplasia treatment) -0.0845(5 Hydroxytryptamine 4E antagonist) + 0.243(CEBPD expression enhancer) -0.0955(Cystinyl aminopeptidase inhibitor) -0.188(Kruppel-like factor 5 inhibitor) + 0.113(Protease activated receptor 1 antagonist) -0.226(Thiosulfate sulfurtransferase inhibitor) + 0.0894(TRPM8 blocker) + 0.141(Mediator release inhibitor) + 0.293(Nicotinic receptor beta3 subunit antagonist) -0.421(Lysophosphatidic acid receptor antagonist) + 0.0923(EphA2 antagonist) -0.112(CYP2E1 inhibitor) -0.0809(Cholecystokinin A agonist) -0.0964(Melanin-concentrating hormone receptor 2 antagonist) -0.0946(Cyclin H inhibitor) + 0.202(NF-E2-related factor 2 stimulant) + 0.119(Ribosomal protein S6 kinase. 70-kDa inhibitor) -0.251(Immunoglobulin E antagonist) + 0.0921(CYP2C19 inhibitor) + 0.402(Acetyl-CoA C-acyltransferase inhibitor) -0.372(Beta-N-acetylhexosaminidase inhibitor) -0.0891(Ribosomal protein S6 kinase alpha 5 inhibitor) + 0.523(Sialidase 1 inhibitor) + 0.0753(Beta glucosidase inhibitor) -0.205(Antihypertriglyceridemic) + 0.167(TP53I3 expression enhancer) + 0.223(UGT2B4 substrate) -0.095(CYP2E substrate) + 0.23(ICAM 1 antagonist) -0.194(ICAM1 expression inhibitor) -0.077(Aminopeptidase A inhibitor) -0.076(5 Hydroxytryptamine 4 agonist) + 0.0422(Systemic lupus erythematosus treatment) + 0.101(Skin irritative effect) + 0.0542(Metalloproteinase-11 inhibitor) + 0.0706(Dopamine D2A antagonist) -0.0972(Carcinogenic. rat. female) -0.883(Histone deacetylase class IV inhibitor) -0.0601(Nicotinamide phosphoribosyltransferase inhibitor) -0.0401(Antiparkinsonian) + 0.0433(PDCD4 expression enhancer) + 0.0557(Sphingomyelinase inhibitor) + 0.21(Galactosylceramide sulfotransferase inhibitor) -0.0554(Dyspnea) -0.145(Syk tyrosine kinase inhibitor) -0.149(GABA B receptor agonist) + 0.107(Gamma-butyrobetaine dioxygenase inhibitor) + 0.0528(Periodontitis treatment) -0.0587(Wound healing agent) -0.0545(Vitamin D receptor antagonist) -0.0703(Carcinogenic. mouse. female. stomach) -0.057(Protein-serine-threonine kinase inhibitor) -0.0401(Potassium channel intermediate-conductance Ca-activated 4 blocker) + 0.143(4.5-Dihydroxyphthalate decarboxylase inhibitor) + 0.0323(Cytosolic phospholipase A2 delta inhibitor) + 0.00699(NumHal) + 0.0264(Lipase inhibitor) + 0.0532(Rho-associated kinase II inhibitor) + 0.0233(Maillard reaction inhibitor) -0.132(Glycosylphosphatidylinositol diacylglycerol-lyase inhibitor) + 0.0297(Neuraminidase (Influenza B) inhibitor) -0.0282(Nicotinic acid receptor 1 agonist) -0.0764(Prostaglandin D2 antagonist) + 0.0314(Liver X receptor alpha agonist) -0.0208(Histidine-rich protein PFHRP-II inhibitor) + 0.0622(Stromelysin 2 inhibitor) -0.0997(Kexin inhibitor) -0.0279(cGMP-dependent protein kinase inhibitor) + 0.0303(5 Hydroxytryptamine 2A antagonist) + 0.035(GABA receptor agonist) + 0.0138(Antiasthmatic) -0.0496(Aryl sulfotransferase inhibitor) + 0.0224(Miotic) -0.0158(Antibiotic Glycopeptide-like) + 0.0171(Carbonic anhydrase VB inhibitor) + 0.114(Histone deacetylase 10 inhibitor) -0.0101(Polyadenylate-binding protein 1 inhibitor) + 0.011(Osteoarthritis treatment) -0.0725(Heparan-alpha-glucosaminide N-acetyltransferase inhibitor) + 0.0197(Dyslipidemia) + 0.0512(Pyruvate dehydrogenase inhibitor) + 0.0107(Sodium/calcium exchanger 1 inhibitor) -0.00982(RNA-directed RNA polymerase (Influenza A) inhibitor) + 0.00708(Antiinfertility. female) + 0.0367(Prostaglandin agonist) -0.0122(Angiotensin AT1 receptor antagonist) -0.00701(Vasculitis treatment) -0.00408(Antineoplastic (multiple myeloma)) + 0.00828(Protein kinase (PKA. PKC. AKT. GRK. AGC-related. RSK. DBF2. SGK) inhibitor) -0.0146(Mandelate 4-monooxygenase inhibitor) + 0.0173(Cathepsin H inhibitor) -0.0384(UDP-glucuronosyltransferase 2B7 inhibitor) + 0.00407(Bombesin 3 receptor antagonist) + 0.00466(Aldehyde dehydrogenase substrate) + 0.00318(Dopamine D1 agonist) -0.00307(Carcinogenic. mouse. male. stomach) + 0.00246(Cyclin-dependent kinase inhibitor) -0.000939(Phosphorylase kinase gamma subunit 2 inhibitor) -0.00126(Alcohol dehydrogenase (NADP+) inhibitor) -0.00223(Methylenetetrahydrofolate dehydrogenase (NADP+) inhibitor) + 0.00127(NMDA receptor glycine site agonist) + 5.96

Model 6

+ 0.711(CYP2D6 substrate) -0.783(Cytosol alanyl aminopeptidase inhibitor) + 0.17(NumAromAtoms) + 0.035(Agranulocytosis) -0.382(CDK1/cyclin B inhibitor) + 0.296(Troponin C inhibitor) + 0.511(Gastrointestinal disturbance) -1.06(Glycogen debranching enzyme inhibitor) -0.394(CTNNB1 expression inhibitor) -1.1(Potassium channel (Ca-activated) activator) + 0.892(NOS2 expression enhancer) + 22.5(Lipophilicity) + 0.142(Lipophilicity^2) -1.03(Length) -0.622(CYP3A substrate) + 0.572(Bronchoconstrictor) + 0.23(Progesterone receptor A antagonist) + 0.304(HERG 1 channel blocker) + 0.0578(Transcription factor inhibitor) -0.131(Kainate receptor 1 antagonist) -0.476(Phosphodiesterase III inhibitor) + 0.16(Antidiabetic symptomatic) + 0.231(Protein kinase B inhibitor) -0.099(Priapism) -0.458(Integrin beta3 antagonist) + 0.0281(EphA2 antagonist) -0.457(Rhinitis) + 0.539(Bradycardic) + 1.07(Colony stimulating factor agonist) + 0.453(Pain) + 0.0928(Carcinogenic. mouse. male. lung) -0.0719(Phenylalanine-tRNA ligase inhibitor) + 0.66(Neurokinin 3 antagonist) -0.751(Amyloid beta aggregation inhibitor) + 0.441(Uterine relaxant) -0.312(Platelet aggregation inhibitor) + 0.25(Dual specificity tyrosine-phosphorylation regulated kinase 1A inhibitor) -0.587(Hyperthermic) -0.421(Steroid 17-alpha-hydroxylase/17.20 lyase inhibitor) -0.234(Cyclin T1 inhibitor) + 0.579(Estrogen beta receptor agonist) -0.295(Gamma-secretase subunit APH-1A inhibitor) -0.341(Vitamin D receptor antagonist) -1(Potassium channel Kv4.3 blocker) -0.48(Carcinogenic. rat) -0.362(Melatonin 1 antagonist) + 0.393(15-Lipoxygenase 2 inhibitor) + 0.568(Ribosomal protein S6 kinase 1. 70-kDa inhibitor) -0.206(Analgesic) -0.364(Myocardial ischemia treatment) -0.794(Beta lactamase inhibitor) + 1.47((R)-aminopropanol dehydrogenase inhibitor) + 0.34(Gynecological disorders treatment) + 2.19(Sialidase 1 inhibitor) + 1.32(Sodium/hydrogen exchanger 3 inhibitor) -0.133(Glycine receptor agonist) -0.145(Vasopressin 1A antagonist) -0.837(Rhodopsin kinase inhibitor) + 0.368(Vasodilator) -0.165(Neuropeptide FF1 antagonist) + 0.25(Glyceryl-ether monooxygenase inhibitor) + 1.08(MAP3K11 inhibitor) + 0.221(Endothelial lipase inhibitor) + 0.212(General pump inhibitor) -0.414(Protein kinase C beta I inhibitor) -1.22(Ribulose-bisphosphate carboxylase inhibitor) + 0.263(Urinary incontinence treatment) + 0.947(Tyrosine phenol-lyase inhibitor) -0.669(Cysteine dioxygenase inhibitor) -0.327(Transforming growth factor beta 3 antagonist) + 0.491(Dyslipidemia) -1.19(Diacylglycerol kinase inhibitor) + 0.911(Acyl-CoA dehydrogenase inhibitor) -1.78(Orotate phosphoribosyltransferase inhibitor) -0.335(AKR1C1 expression enhancer) + 0.42(Diacylglycerol O-acyltransferase inhibitor) + 0.442(Alpha galactosidase inhibitor) + 0.316(Protein kinase C iota inhibitor) + 0.462(Ulcer. peptic) -0.384(Tyrosine-protein kinase TXK inhibitor) + 0.251(Antifungal) -0.241(Beta amyloid protein antagonist) -1.1(Indanol dehydrogenase inhibitor) -0.738(Cathepsin S inhibitor) + 0.479(CAT expression inhibitor) + 0.234(Growth hormone releasing factor agonist) -0.202(CYP51 inhibitor) + 0.821(Nuclear factor of activated T-cells cytoplasmic 2 inhibitor) + 0.427(Leukotriene A4 hydrolase inhibitor) -0.249(Ribosomal protein S6 kinase. 90-kDa inhibitor) + 1.17(Riboflavin synthase inhibitor) + 0.683(Tripeptide aminopeptidase inhibitor) -0.188(Glycine transporter 1 inhibitor) + 0.122(Eye irritation. weak) + 0.405(Carcinogenic. breast) -1.5(Low molecular weight phosphotyrosine protein phosphatase inhibitor) -0.387(CDC25A inhibitor) + 11.5(Length^3) -0.868(Beta 2 adrenoreceptor agonist) + 0.387(Antialcoholic) -0.445(KPNA2 expression inhibitor) + 1.03(Adenine deaminase inhibitor) + 0.194(Toxic) + 1.04(Procollagen-proline 3-dioxygenase inhibitor) + 0.264(Histone deacetylase class II inhibitor) -0.299(Pyruvate dehydrogenase kinase inhibitor) + 1.19(Arachidonic acid antagonist) -0.0421(Antiprotozoal (Trichomonas)) -14.8(Volume^2) -0.211(Vesicle monoamine transporter inhibitor) + 0.793(NAD+ nucleosidase inhibitor) -0.39(Akinesia) + 0.297(Integrin alpha4beta1 antagonist) -0.153(Fumarate hydratase inhibitor) -0.784(L-Serine ammonia-lyase inhibitor) -0.321(Preterm labor treatment) -1.25(Glucose-6-phosphate isomerase inhibitor) + 0.123(NumPositive) -0.869(Cholesterol esterase inhibitor) + 0.717(Adenylate kinase inhibitor) -0.553(Glyoxylate reductase (NADP+) inhibitor) + 0.386(CDH1 expression enhancer) -0.351(CA2 expression enhancer) -0.0399(NumAcceptor) + 0.884(Calmodulin-domain protein kinase 1 inhibitor) -0.215(Trans-octaprenyltranstransferase inhibitor) -0.194(Antituberculosic) -0.355(Dizziness) -0.794(Phosphoglycolate phosphatase inhibitor) -0.377(Cerebral hemorrhage) -0.342(Protein phosphatase 2A inhibitor) + 0.617(Phospholipase inhibitor) -0.135(Antineoplastic (lymphocytic leukemia)) -0.417(AREG expression enhancer) -0.538(Chymotrypsin inhibitor) + 0.14(Bone formation stimulant) + 0.241(ErbB-1 antagonist) -0.563(PPARG expression enhancer) + 0.174(Antineoplastic (breast cancer)) -0.625(Anesthetic inhalation) + 5.97(Volume) + 0.104(Antianginal) + 1.09(Fatty acid binding protein adipocyte inhibitor) -0.637(Leukopenia) -0.178(Hexokinase stimulant) + 0.243(Pantetheine-phosphate adenylyltransferase inhibitor) + 0.265(Neurotoxic) + 0.205(Pyrimidine antagonist) + 0.679(SPP1 expression enhancer) -0.209(NADPH oxidase 4 inhibitor) + 0.25(Cytosolic phospholipase A2 beta inhibitor) -0.535(CF transmembrane conductance regulator antagonist) + 0.728(STC2 expression enhancer) -0.232(Opioid delta receptor antagonist) + 0.282(Purinergic P2X1 antagonist) -0.513(Guanylate cyclase inhibitor) + 0.23(Maillard reaction inhibitor) + 0.226(Tyk2 inhibitor) -0.101(Protein-tyrosine phosphatase F inhibitor) -0.273(DNA-dependent protein kinase inhibitor) + 1.54(Phosphoglucomutase inhibitor) + 0.0904(MW) + 0.179(5 Hydroxytryptamine release stimulant) -0.185(Parathyroid hormone secretion stimulant) -0.761(FAS expression inhibitor) + 0.371(CYP3A3 substrate) + 0.196(Plasmepsin inhibitor) -0.139(Mucosal addressin cell adhesion molecule 1 inhibitor) -0.535(UGT1A3 substrate) -0.137(cAMP-dependent protein kinase type II-alpha regulatory subunit inhibitor) -0.753(Asparagine synthase (glutamine-hydrolysing) inhibitor) + 0.103(3 Beta-hydroxy-delta 5-steroid dehydrogenase inhibitor) -0.189(Thymidine kinase 2 inhibitor) -0.263(Sphingosine 1-phosphate receptor 1 antagonist) + 0.513(Thromboxane A2 antagonist) + 0.286(Anesthetic local) + 0.141(rRNA (adenosine-2'-O-)-methyltransferase inhibitor) + 0.299(Periodontitis treatment) -0.13(Interferon inducer) -0.237(Epstein-Barr nuclear antigen 1 inhibitor) -0.316(L-amino-acid oxidase inhibitor) + 0.188(Convulsant) -0.221(CYP1A substrate) + 0.138(Sentrin-specific protease 8 inhibitor) -0.239(Teratogen) -0.194(Tryptophan 2.3-dioxygenase inhibitor) + 0.42(L-ascorbate peroxidase inhibitor) -0.145(Heparin epidermal growth factor antagonist) -0.224(Macrophage elastase inhibitor) + 0.825(Thermolysin inhibitor) -0.0947(Phosphodiesterase 8B inhibitor) + 0.17(Eye irritation. moderate) -0.223(Sodium channel blocker) -0.64(NAD(P)H dehydrogenase (quinone) 1 inhibitor) + 0.206(Cyclin-dependent kinase 7 inhibitor) -0.111(CYP3A4 inhibitor) + 0.335(Formate-dihydrofolate ligase inhibitor) + 0.263(MMP2 expression inhibitor) -0.157(Amiloride-sensitive cation channel 1 blocker) -0.16(MAP3K7 inhibitor) + 0.131(Cystinyl aminopeptidase inhibitor) -0.126(Antiemetic) -0.378(Phospholipase D1 inhibitor) + 0.0566(Status epilepticus) + 0.36(CYP4A11 inhibitor) -0.382(Corticotropin releasing factor antagonist) -0.17(Neurotrophic factor enhancer) -0.8(GMP synthase inhibitor) -0.193(Ribosomal protein S6 kinase alpha 1 inhibitor) + 0.41(Acetyl-CoA carboxylase 2 inhibitor) -0.466(UDP-glucuronate decarboxylase inhibitor) -0.323(Alpha 2 adrenoreceptor agonist) -0.116(Retinoprotector) + 0.623(3-Methyl-2-oxobutanoate dehydrogenase (lipoamide) inhibitor) -0.336(Fatty acid oxidation inhibitor) + 0.235(Mediator release inhibitor) -0.306(CDK2 expression inhibitor) -0.21(Histamine release inhibitor) -0.187(LDLR expression enhancer) + 0.133(Liver X receptor agonist) -0.108(Retinoic acid beta receptor agonist) -0.229(Aurora kinase inhibitor) -0.0766(Liver fibrosis treatment) + 0.153(WIPI1 expression enhancer) + 0.161(Antiepileptic) -0.0852(Purinergic P2 antagonist) + 0.154(MAP kinase inhibitor) + 0.417(DNA ligase (ATP) inhibitor) -0.299(Myosin ATPase inhibitor) -0.189(MT1G expression enhancer) + 0.134(Rho-associated kinase II inhibitor) -0.268(Hypoxia inducible factor 1 alpha inhibitor) + 0.147(Growth factor agonist) + 0.308(Adenosine A2b receptor antagonist) -0.779(Methylmalonyl-CoA mutase inhibitor) -0.117(Parkinsonism) + 0.131(Sirtuin inhibitor) + 0.259(Adenylate cyclase inhibitor) -0.509(5'-Nucleotidase inhibitor) + 0.33(Sterol 3-beta-glucosyltransferase inhibitor) -0.0889(Complement inhibitor) -0.0556(Antineoplastic (squamous cell carcinoma)) + 0.178(Probable DNA dC->dU-editing enzyme APOBEC-3A inhibitor) + 0.0787(M18 aspartyl aminopeptidase inhibitor) -0.197(Histamine H2 receptor agonist) -0.172(Arylamine N-Acetyltransferase substrate) + 0.107(Nausea) + 0.473(Cytidylate kinase inhibitor) -0.231(5 Hydroxytryptamine 4 antagonist) -0.284(Trace amine-associated receptor 1 antagonist) -0.0968(Ephrin antagonist) + 0.0618(HIF1A expression inhibitor) + 0.0976(Melanin-concentrating hormone receptor antagonist) -0.0823(Aldose reductase substrate) + 0.24(Cytochrome oxidase inhibitor) + 0.12(CYP1A1 substrate) + 0.0773(Neutropenia treatment) + 0.235(L-iditol 2-dehydrogenase inhibitor) -0.237(Dihydroorotate oxidase inhibitor) + 0.038(Antineoplastic (non-Hodgkin's lymphoma)) + 0.0755(Ca2+/calmodulin-dependent kinase II inhibitor) -0.0934(Carcinogenic. rat. male. large intestine) -0.066(Insulin like growth factor 3 antagonist) -0.411(Amylo-alpha-1.6-glucosidase inhibitor) -0.0838(Antihypercholesterolemic) + 0.223(Paget's disease treatment) + 0.0958(Carcinogenic. mouse. male. thyroid gland) -0.0923(Transforming growth factor beta antagonist) + 0.0375(Rheumatoid arthritis treatment) + 0.152(2-Nitropropane dioxygenase inhibitor) + 0.276(Phospholipase A2 inhibitor) -0.22(Glutamate (mGluR group III) antagonist) -0.106(Linoleate diol synthase inhibitor) -0.175(Androgen antagonist) -0.0427(Growth stimulant) -0.247(Homocitrate synthase inhibitor) -0.06(Vasopressin 2 agonist) + 0.11(Antiinflammatory. ophthalmic) + 0.0556(Analeptic) + 0.0644(Membrane integrity antagonist) + 0.044(Cachexia treatment) + 0.0442(Lipase inhibitor) -0.0633(Purinergic receptor antagonist) + 0.179(Glycerol-3-phosphate dehydrogenase (NAD+) inhibitor) + 0.106(Headache) -0.0776(P-glycoprotein inhibitor) -0.0573(Glycogen synthase kinase-3 alpha inhibitor) + 0.133(MAP kinase kinase inhibitor) + 0.0441(Histone deacetylase SIRT1 stimulant) + 0.0405(Deoxynucleoside kinase inhibitor) + 0.0349(Baculoviral IAP repeat-containing protein 2 inhibitor) + 0.16(Arginase inhibitor) -0.0339(Paraplegia) -0.035(Angiotensin AT1A receptor antagonist) + 0.0498(Saluretic) -0.0416(Beta-adrenergic receptor kinase inhibitor) -0.0687(Antiperistaltic) + 0.0744(Geranylgeranyltransferase inhibitor) -0.0279(Geranyltranstransferase (Leishmania) inhibitor) + 0.12(UGT2B7Y substrate) -0.0244(BTG1 expression enhancer) + 0.0282(Hedgehog signaling inhibitor) -0.21(Methylcrotonoyl-CoA carboxylase inhibitor) -0.0353(G-protein-coupled receptor kinase inhibitor) + 0.0167(Cytokinin dehydrogenase inhibitor) -0.0564(Telomerase inhibitor) -0.0589(3(or 17)beta-hydroxysteroid dehydrogenase inhibitor) + 0.0384(Antiviral (Adenovirus)) -0.00327(NumNegative) -0.0556(Nuclear receptor subfamily 4. group A. member 2 agonist) + 0.0154(Elastase 2 inhibitor) -0.0515(Peptidyl-Lys metalloendopeptidase inhibitor) + 0.0236(Ca2+/calmodulin-dependent kinase II alpha inhibitor) + 0.0344(Prion diseases treatment) -0.0267(Carcinogenic. rat. female) -0.0107(CXC chemokine receptor antagonist) + 0.0244(2-Acylglycerol O-acyltransferase inhibitor) -0.0253(NOS3 expression inhibitor) -0.00722(Alpha 1L adrenoreceptor antagonist) + 0.00618(Purinergic P2Y1 antagonist) -0.00704(5 Hydroxytryptamine 1F agonist) + 0.00701(MAP-kinase-activated kinase 2 inhibitor) -0.0223(NADH dehydrogenase inhibitor) + 0.00481(Carbonic anhydrase XII inhibitor) -0.00472(Toll-Like receptor antagonist) -0.0129(UGT1A7 substrate) + 0.00628(SERPINA3 expression enhancer) -0.00411(11-Beta-hydroxysteroid dehydrogenase 1 inhibitor) -0.0172(6-Phosphofructo-2-kinase inhibitor) + 0.00723(Dipeptidyl peptidase II inhibitor) -0.00314(Retinoid X beta receptor antagonist) -0.00566(Histamine H3 receptor antagonist) + 0.00188(Cyclic GMP phosphodiesterase inhibitor) + 0.000242(FNDC4 expression enhancer) + 5.57

Model 7

-0.253(Dopamine D1A antagonist) + 0.29(Cytosol alanyl aminopeptidase inhibitor) -0.361(HIV-1 integrase inhibitor) + 0.356(Dysphoria) -3.39(Length) -0.223(MAP kinase kinase 2 inhibitor) + 24.5(Lipophilicity) + 0.156(Lipophilicity^2) + 0.18(NumAromAtoms) -0.236(Aggrecanase inhibitor) + 0.341(Progesterone receptor A antagonist) + 0.0265(G-protein coupled bile acid receptor 1 antagonist) + 0.423(Respiratory distress syndrome treatment) -0.507(Glutathione reductase inhibitor) + 0.0396(Inflammation) -0.428(DNA repair enzyme inhibitor) + 0.272(Calcium channel (voltage-sensitive) blocker) -1.67(Lysozyme inhibitor) -0.33(Prostaglandin D synthase inhibitor) + 0.638(Gastrointestinal disturbance) + 0.267(5 Hydroxytryptamine 5 antagonist) -0.258(Angiotensin AT1 receptor antagonist) -0.252(Carbonic anhydrase IX inhibitor) + 0.342(Glyceryl-ether monooxygenase inhibitor) + 1.53(Methionyl aminopeptidase inhibitor) -0.455(Purinergic P2 antagonist) + 0.0802(Gaucher disease treatment) + 0.304(Sodium/glucose cotransporter inhibitor) -0.337(NGFR expression enhancer) + 0.59(Uterine relaxant) + 0.612(Ribonucleoside-diphosphate reductase M1 chain inhibitor) -0.086(NumAcceptor) -1.73(Isopentenyl-diphosphate DELTA-isomerase inhibitor) -0.241(Thymidine kinase 2 inhibitor) + 0.413(Ca2+/calmodulin-dependent kinase II delta inhibitor) + 0.806(Acetyl-CoA C-acyltransferase inhibitor) + 0.619(15-Lipoxygenase 2 inhibitor) -0.644(Preterm labor treatment) + 0.0968(Histone deacetylase 4 inhibitor) + 0.0945(Antitussive. narcotic) -0.384(Photinus-luciferin 4-monooxygenase (ATP-hydrolysing) inhibitor) + 0.833(Lysine decarboxylase inhibitor) -0.597(Alpha-N-acetylgalactosaminide alpha-2.6-sialyltransferase inhibitor) -0.241(Antineoplastic (renal cancer)) + 15.1(Length^3) + 0.316(IL6 expression enhancer) + 0.633(Cytokine production stimulant) -0.202(Antileprosy) + 1.16(Cytidylate kinase inhibitor) -0.311(Steroid 17-alpha-hydroxylase/17.20 lyase inhibitor) + 0.363(Purinergic P2X1 antagonist) + 0.573(Gametolysin inhibitor) + 0.828(Arachidonic acid antagonist) + 0.526(Respiratory analeptic) -0.864(3-Dehydroquinate synthase inhibitor) -0.332(Protein phosphatase 2A inhibitor) -0.722(Glutamate (mGluR3) agonist) -0.411(CYP2C substrate) -0.469(Cytostatic) -0.95(Lacrimal secretion stimulant) -19.4(Volume^2) + 0.615(Carbonic anhydrase V inhibitor) + 0.428(Immunosuppressant) + 1.69(CYP4F3 substrate) -0.669(Cystic fibrosis treatment) + 0.246(Antineoplastic (brain cancer)) -0.318(Aurora-B kinase inhibitor) + 0.15(Protein-tyrosine phosphatase G1 inhibitor) + 0.18(Carcinogenic. rat. female. kidney) + 0.307(Attention deficit/hyperactivity disorder treatment) -0.258(CDK1/cyclin B inhibitor) + 0.277(Elastase 3A inhibitor) -0.496(Splenomegaly) -0.716(Dual specificity tyrosine-phosphorylation regulated kinase 1B inhibitor) + 0.925(Ether-a-go-go potassium channel 1 blocker) + 0.152(Antibiotic beta Lactam-like) + 0.374(MCL1 expression inhibitor) -0.548(CYP3A4 expression enhancer) + 0.217(Progesterone antagonist) -0.664(5'-Nucleotidase inhibitor) -0.314(Vascular endothelial growth factor 3 antagonist) -0.262(Potassium channel intermediate-conductance Ca-activated blocker) -0.273(Subtilisin inhibitor) + 0.0565(c-Src kinase inhibitor) -0.387(Ribosomal protein S6 kinase alpha 3 inhibitor) -0.907(Histone-lysine N-methyltransferase. H3 lysine-9 specific 3 inhibitor) + 0.268(Malonyl-CoA decarboxylase inhibitor) + 0.718(Sodium/hydrogen exchanger 3 inhibitor) -0.463(Beta-adrenergic receptor kinase inhibitor) + 7.62(Volume) + 0.624(MYC expression enhancer) + 0.257(Cataract) + 1.18(Proto-oncogene protein c-fos inhibitor) + 0.138(NumPositive) + 0.419(Carcinogenic. breast) -0.242(IL12B expression inhibitor) + 0.667(Phosphatidylcholine-sterol O-acyltransferase inhibitor) + 1.42(Cathepsin D inhibitor) + 0.688(Anesthetic local) -0.925(Procollagen C-endopeptidase inhibitor) -0.197(DNA-(apurinic or apyrimidinic site) lyase inhibitor) -1.4(Histone deacetylase 9 inhibitor) -0.179(Tumour necrosis factor alpha antagonist) + 0.457(Cholinergic) -0.258(Carcinogenic. mouse. female) -0.452(Antiacne) -0.968(Heat shock protein 90 beta antagonist) + 0.413(Cathepsin L2 inhibitor) -0.116(Protein-tyrosine phosphatase 1B inhibitor) + 0.236(Carcinogenic. group 2B) -0.284(Gastrointestinal hemorrhage) -0.248(Melatonin antagonist) -0.643(AREG expression enhancer) -0.213(Antiviral (Hepatitis C)) + 0.353(Acidosis) -0.559(PPARG expression enhancer) -1.11(Cholesterol esterase inhibitor) + 1.23(2-Aminohexano-6-lactam racemase inhibitor) -1.14(Ethanolamine kinase inhibitor) + 0.947(Adenosine A3 receptor antagonist) -1.12(Neuropathy treatment) + 1.17(CDC-like kinase 3 inhibitor) + 0.652(UGT2B4 substrate) + 0.145(MW) -0.751(Glutamate (mGluR) antagonist) + 0.308(GABA receptor agonist) -1.24(Asparagine synthase (glutamine-hydrolysing) inhibitor) + 0.259(Pain) -0.349(Dizziness) + 0.393(AR expression inhibitor) -0.262(CYP51 inhibitor) -0.809(Fatty acid oxidation inhibitor) + 0.808(Ethanolaminephosphotransferase inhibitor) -0.397(Non-steroidal antiinflammatory agent) -0.914(Agaritine gamma-glutamyltransferase inhibitor) -0.292(Leukopenia) -0.418(CYP2B1 substrate) + 0.212(Phosphate transporter inhibitor) + 0.213(Bone formation stimulant) -1.17(Nicotinate phosphoribosyltransferase inhibitor) + 0.971(MAP3K11 inhibitor) -1.11(5-Formyltetrahydrofolate cyclo-ligase inhibitor) -0.223(Myocardial ischemia treatment) + 0.274(Protein kinase B inhibitor) -0.282(Neutral endopeptidase inhibitor) -0.221(OLFML3 expression enhancer) + 0.576(Ribose-5-phosphate isomerase inhibitor) + 0.282(Antialcoholic) + 0.207(Carcinogenic. rat. female. mammary gland) -0.204(Glycosylceramidase inhibitor) -0.201(T-cell protein-tyrosine phosphatase inhibitor) + 0.228(Opioid mu 1 receptor antagonist) -0.372(Antiuremic) + 0.554(Homogentisate 1.2-dioxygenase inhibitor) -0.431(Lactoylglutathione lyase inhibitor) + 0.131(Septic shock treatment) + 0.321(Periodontitis treatment) + 0.58(IL4 expression enhancer) -0.39(Acetylcholine muscarinic agonist) + 0.239(Deoxynucleoside kinase inhibitor) + 0.193(Troponin C inhibitor) -0.188(Tubulin agonist) -0.548(Dopamine agonist) + 0.796(L-iditol 2-dehydrogenase inhibitor) + 0.166(Chemosensitizer) + 0.548(2-Isopropylmalate synthase inhibitor) -0.826(P2 nucleoside transporter inhibitor) -0.266(Gastrin inhibitor) + 0.154(Hepatic disorders treatment) + 0.199(Methylenetetrahydrofolate reductase (NADPH) inhibitor) -0.207(Histidine-rich protein PFHRP-II inhibitor) + 0.727(Phosphoglycerate dehydrogenase inhibitor) + 0.679(CCL5 expression enhancer) -0.351(Sialorrhea) + 0.235(Serine carboxypeptidase inhibitor) -0.858(Glyoxylate reductase (NADP+) inhibitor) + 1.25(Uridine nucleosidase inhibitor) -1.1(Aminopeptidase I inhibitor) + 0.258(Nicotinic acid receptor agonist) -0.231(Integrin alphaVbeta3 antagonist) -0.244(Hypertensive) + 0.312(Estrogen agonist) + 0.31(CYP2D6 inhibitor) + 0.849(Saccharopine dehydrogenase (NAD+. L-lysine-forming) inhibitor) + 0.928(Gestagen-like) + 0.24(Calcium release-activated channel blocker) -0.383(Aldehyde dehydrogenase 1A2 inhibitor) + 0.173(Bulimia treatment) -0.486(CYP1B1 expression inhibitor) -0.462(UGT1A6 substrate) + 0.414(CDK4 expression inhibitor) -0.229(Proto-oncogene tyrosine-protein kinase Yes inhibitor) -0.223(Endothelin B receptor antagonist) -0.254(1-Alkylglycerophosphocholine O-acetyltransferase inhibitor) -0.813(Free fatty acid receptor 1 agonist) -0.368(MGMT expression enhancer) + 0.155(Alpha 2c adrenoreceptor agonist) + 0.59(Phospholipase inhibitor) -0.154(Kainate receptor 4 antagonist) -0.205(Nicastrin inhibitor) -0.0785(Rhinitis treatment) -0.187(Depression) + 0.383(GADD45A expression enhancer) + 0.138(Prostaglandin E2 agonist) -0.189(Protein kinase C eta inhibitor) + 0.247(DELTA14-sterol reductase inhibitor) + 0.653(TGF beta receptor type II kinase inhibitor) + 0.168(Cannabinoid CB2 receptor agonist) + 0.165(Gastrointestinal disorders treatment) + 0.0882(Antineoplastic (non-Hodgkin's lymphoma)) -0.105(Angiogenesis stimulant) + 0.308(Histone deacetylase inhibitor) -0.104(Spasmolytic. urinary) -0.211(Endocrine disruptor) + 0.234(CYP1A1 substrate) -0.276(Renilla-luciferin 2-monooxygenase inhibitor) -0.0256(NumNegative) -0.585(Cholesterol absorption inhibitor) + 0.133(Interleukin 2 agonist) -0.218(Potassium channel (Ca-activated) blocker) + 0.178(Pantetheine-phosphate adenylyltransferase inhibitor) -0.498(Diacylglycerol O-acyltransferase inhibitor) + 0.187(Pectate lyase inhibitor) + 0.281(TP53 expression enhancer) + 0.136(CDC-like kinase 1 inhibitor) -0.119(5 Hydroxytryptamine 4 agonist) -0.218(Eosinophilia) + 0.143(Cytosolic phospholipase A2 delta inhibitor) + 0.0941(HERG 1 channel blocker) + 0.536(Formyl peptide receptor antagonist) + 0.179(N-carbamoyl-L-amino-acid hydrolase inhibitor) -0.129(Methionyl aminopeptidase 2 inhibitor) + 0.188(Lichenoid eruption) + 0.148(Emetic) -0.161(MT1G expression enhancer) + 0.286(Membrane permeability enhancer) -0.108(Vasculitis treatment) + 0.257(Lysyl oxidase inhibitor) + 0.282(ErbB antagonist) + 0.233(Parotid gland enlargement) + 0.358(Potassium channel Kv1.1 blocker) -0.615(Purine nucleosidase inhibitor) -0.29(KIAA0101 expression inhibitor) -0.462(SMN2 expression enhancer) -0.476(Melatonin 1a antagonist) -0.17(MAP kinase 13 inhibitor) + 0.118(Guanine deaminase inhibitor) + 0.197(Protein kinase C iota inhibitor) -0.239(3C-like protease (Human coronavirus) inhibitor) -0.239(Akinesia) -0.212(Carcinogenic. rat) + 0.224(STC2 expression enhancer) -0.303(Janus tyrosine kinase 2 inhibitor) + 0.165(Focal adhesion kinase inhibitor) + 0.166(Cyanosis) -0.154(Acylaminoacyl-peptidase inhibitor) + 0.208(MMP2 expression inhibitor) -0.374(N1L inhibitor) + 0.233(Headache) -0.158(5 Hydroxytryptamine 2C antagonist) -0.158(Kainate receptor 2 antagonist) -0.114(Phospholipase A2 X inhibitor) -0.0792(CXC chemokine 2 receptor antagonist) + 0.134(5 Hydroxytryptamine 2 antagonist) -0.0735(Antineoplastic (small cell lung cancer)) -0.251(DNA gyrase inhibitor) + 0.119(Protease inhibitor) -0.0937(Paraplegia) -0.196(Carcinogenic. mouse) -0.311(Antirickettsial) + 0.219(Raynaud's phenomenon) -0.0834(Analgesic. opioid) -0.243(Cathepsin S inhibitor) + 0.167(Glycine transporter inhibitor) -0.255(Adrenaline agonist) + 0.0898(Sphingomyelinase inhibitor) + 0.108(RET inhibitor) + 0.44(Xanthine phosphoribosyltransferase inhibitor) + 0.274(HCV NS3/NS4A protease inhibitor) -0.064(Male reproductive disfunction treatment) -0.149(DDIT3 expression enhancer) + 0.181(IL8 expression enhancer) -0.479(Cellulose synthase (UDP-forming) inhibitor) + 0.091(Alpha 1b adrenoreceptor antagonist) -0.277(Mannosyl-oligosaccharide glucosidase inhibitor) + 0.129(CYP2C19 substrate) + 0.257(Nicotinic receptor beta3 subunit antagonist) + 0.603(Deoxyguanosine kinase inhibitor) + 0.135(Alkaline phosphatase inhibitor) + 0.22(Targeting protein for Xklp2 inhibitor) -0.229(Dihydroorotate oxidase inhibitor) -0.0569(5 Hydroxytryptamine 4E antagonist) -0.0616(HIV-1 protease inhibitor) + 0.0493(Antineoplastic (bone cancer)) -0.0627(Ribosomal protein S6 kinase alpha 2 inhibitor) -0.114(Urease inhibitor) + 0.218(Aminopeptidase microsomal inhibitor) -0.189(Leukotriene A4 hydrolase inhibitor) + 0.197(Thromboxane A2 antagonist) -0.209(Arginine decarboxylase inhibitor) + 0.0708(VLA-4 antagonist) -0.0612(Polycystin-1 inhibitor) + 0.12(Diabetic nephropathy treatment) + 0.067(Protein kinase B gamma inhibitor) + 0.0364(Alzheimer's disease treatment) -0.148(IGFBP2 expression enhancer) -0.0432(Eukaryotic translation initiation factor 4H inhibitor) + 0.0604(Coma) + 0.144(Magnesium-protoporphyrin IX methyltransferase inhibitor) -0.0339(Prostate cancer treatment) + 0.0373(Farnesyltransferase inhibitor) -0.0527(Gelatinase inhibitor) -0.0759(Sensitization) -0.238(Solute carrier family 22 member 12 inhibitor) -0.0922(Inducible nitric oxide synthase inhibitor) -0.106(Epoxide hydrolase inhibitor) -0.0411(Phosphodiesterase 3A inhibitor) + 0.0465(Eye irritation. moderate) + 0.0355(3 Beta-hydroxy-delta 5-steroid dehydrogenase inhibitor) -0.0435(Smo receptor antagonist) + 0.0196(Dry eye) -0.0356(Carbonyl reductase [NADPH] 1 inhibitor) + 0.168(1-Pyrroline-5-carboxylate dehydrogenase inhibitor) + 0.0361(Weight gain) -0.0712(8-Amino-7-oxononanoate synthase inhibitor) + 0.0736(Inosine monophosphate dehydrogenase inhibitor) -0.13(Rhodopsin kinase inhibitor) -0.0653(Rubredoxin-NAD+ reductase inhibitor) + 0.0384(Catechol oxidase inhibitor) + 0.0824(1-Deoxy-D-xylulose-5-phosphate reductoisomerase inhibitor) -0.0155(Adenosine A2b receptor agonist) -0.0187(Melanin-concentrating hormone receptor 2 antagonist) + 0.0229(Rho-associated kinase inhibitor) + 0.0106(Psychotropic) + 0.0454(AMP-activated protein kinase. gamma-1 subunit inhibitor) + 0.0224(Vasopressor) + 0.0131(NADH oxidase inhibitor) + 0.0177(Nephritis) -0.0157(Ribosomal protein S6 kinase. 90-kDa inhibitor) -0.034(Somatostatin agonist) + 0.0356(MarA inhibitor) -0.0307(Sphingosine 1-phosphate receptor 3 antagonist) + 0.00824(Osteoarthritis treatment) + 0.00819(Gout treatment) -0.0143(Monodehydroascorbate reductase (NADH) inhibitor) + 0.0202(IL1A expression enhancer) + 0.025(Bombesin 2 receptor antagonist) + 0.00817(Sialidase 3 inhibitor) -0.0123(Carcinogenic. mouse. female. stomach) -0.0164(ICAM1 expression enhancer) + 0.00436(Alcohol dehydrogenase I inhibitor) -0.012(TNFRSF11B expression enhancer) + 0.0217(CYP27 substrate) + 0.00423(Janus tyrosine kinase 1 inhibitor) + 0.00955(CDKN1C expression enhancer) -0.00773(5-Alpha-reductase 2 inhibitor) + 0.00222(Epidermal growth factor receptor kinase inhibitor) -0.00173(Phospholipase A2 IIa inhibitor) -0.00162(cGMP-dependent protein kinase inhibitor) -0.00375(Beta lactamase II inhibitor) -0.00102(Alpha 2d adrenoreceptor antagonist) + 6.12

Model 8

+ 0.346(Thiopurine S-methyltransferase inhibitor) + 0.566(FASLG expression inhibitor) + 0.973(Length) -0.31(Antiinfective) + 0.967(Alpha 2b adrenoreceptor agonist) -0.129(Antiparkinsonian. rigidity relieving) -0.0553(TNF convertase inhibitor) -0.0799((R)-3-amino-2-methylpropionate-pyruvate transaminase inhibitor) -0.379(Glutamate dehydrogenase [NAD(P)+] inhibitor) -0.848(Inner centromere protein inhibitor) + 25(Lipophilicity) + 0.661(Tyrosine transaminase inhibitor) + 0.387(CYP1A1 expression enhancer) -0.206(Protein-tyrosine phosphatase 1B inhibitor) -0.183(THBS1 expression enhancer) + 0.142(Lipophilicity^2) + 0.407(Glyceryl-ether monooxygenase inhibitor) -0.253(Urease inhibitor) + 0.0528(Runt-related transcription factor 1 inhibitor) -0.34(Nephrotoxic) -0.433(Phosphodiesterase VIII inhibitor) + 0.375(Arrhythmogenic) -0.523(Amiloride-sensitive cation channel 1 blocker) + 0.49(Antineoplastic (colorectal cancer)) + 0.123(NumAromAtoms) -0.808(CYP3A4 inducer) + 0.303(Carcinogenic. rat. female. nasal cavity) + 0.479(NOS2 expression enhancer) + 0.306(Alanine racemase inhibitor) -0.0591(Heart failure treatment) -0.375(Cystathionine gamma-lyase inhibitor) + 0.294(Calcium antagonist) -1.41(Fatty liver) + 0.0155(Immunoglobulin Fc receptor antagonist) + 18.4(Volume) -0.783(MAO inhibitor) + 0.892(MYC expression enhancer) -0.287(Alcohol dehydrogenase inhibitor) + 0.354(Excitability) -0.201(Anaphylaxis) + 0.852(GABA aminotransferase inhibitor) -1.01(Histone deacetylase class IIa inhibitor) + 1.43(8-oxodGTPase stimulant) -0.337(Leukotriene B4 receptor 2 antagonist) -1.63(N-formylglutamate deformylase inhibitor) -0.378(Anesthetic inhalation) -1.15(IFITM1 expression enhancer) + 0.481(HMGCS1 expression enhancer) -0.993(Glyoxylate reductase (NADP+) inhibitor) -0.116(Squalene-hopene cyclase inhibitor) -0.0718(NumAcceptor) + 0.274(Antiviral (Influenza A)) -0.238(Prostatic (benign) hyperplasia treatment) + 0.23(Carcinogenic. mouse. male. lung) + 0.33(Biliary tract disorders treatment) -0.64(Pyruvate dehydrogenase kinase 1 inhibitor) + 0.228(Sirtuin inhibitor) + 0.963(Alanine dehydrogenase inhibitor) + 0.218(Cytosolic phospholipase A2 beta inhibitor) -0.149(Threonine synthase inhibitor) -0.502(Glutathione S-transferase substrate) + 0.202(Rho-associated kinase I inhibitor) + 1.18(Phosphatidate cytidylyltransferase inhibitor) + 0.355(CYP1A1* substrate) + 0.668(NUPR1 expression enhancer) + 0.741(AMP-activated protein kinase stimulant) + 0.25(Inositol 1.4.5-triphosphate receptor 1 antagonist) + 0.371(GST A substrate) + 0.593(SUMO-conjugating enzyme UBC9 inhibitor) -1.51(Sigma 2 receptor antagonist) -0.154(Bone morphogenic protein inhibitor) -0.593(Janus tyrosine kinase 2 inhibitor) + 1.01(Narcolepsy treatment) -0.379(Phosphodiesterase II inhibitor) -0.246(Antiviral (Herpes)) -0.934(Thiosulfate sulfurtransferase inhibitor) + 19.8(Length^3) + 0.904(CYP2D6 inhibitor) -0.363(Antihistaminic) -0.243(Myocardial ischemia treatment) + 0.961(MAO B substrate) + 0.14(Spasmogenic) -0.561(Arylamine N-Acetyltransferase substrate) -0.421(CA2 expression enhancer) -0.399(Carcinogenic. mouse. female. stomach) -0.339(SLC7A5 expression enhancer) + 0.236(Antiasthmatic) + 1.08(Antibiotic) + 0.483(Antihypoxic) -0.367(MAP3K8 inhibitor) -0.701(Choline kinase inhibitor) -0.268(Epstein-Barr nuclear antigen 1 inhibitor) -0.447(Microtubule stabilization) + 0.382(Phosphodiesterase 11A inhibitor) -0.43(Cerebral hemorrhage) + 0.514(CAT expression inhibitor) -0.634(Akinesia) -0.171(CYP11A1 inhibitor) + 0.883(Alanine transaminase inhibitor) -0.44(Beta-adrenergic receptor kinase inhibitor) -0.196(CYP3A4 inhibitor) + 0.331(Phosphodiesterase 4B inhibitor) + 0.111(Antiparasitic) + 0.376(Integrin alpha4 antagonist) -1.35(Orotate phosphoribosyltransferase inhibitor) -0.505(Cyclic AMP modulator) -1.24(Estrogen-related receptor alpha antagonist) -0.842(Dopamine D3 agonist) -0.234(Histidine-rich protein PFHRP-II inhibitor) + 0.641(IL1A expression enhancer) + 0.281(Acyl-CoA dehydrogenase (NADP+) inhibitor) + 0.27(Estrogen-related receptor beta antagonist) + 0.255(DNA gyrase subunit A inhibitor) + 0.108(Ribonucleoside triphosphate reductase inhibitor) + 0.501(Caspase 3 inhibitor) -0.426(Antimycobacterial) -0.596(Menstruation disorders treatment) -15.4(Volume^2) + 0.697(Calcium channel activator) + 0.255(Myocarditis) -0.29(NGFR expression enhancer) -0.226(Non-steroidal antiinflammatory agent) + 0.381(Analeptic) + 0.328(Estrone sulfotransferase stimulant) + 0.163(Inflammatory Bowel disease treatment) -0.707(Aspartate transaminase inhibitor) + 0.941(Peptide deformylase inhibitor) -0.153(Mucosal addressin cell adhesion molecule 1 inhibitor) + 0.741(15-Lipoxygenase inhibitor) + 0.671(Beta lactamase TEM-1 inhibitor) + 0.28(Prolyl aminopeptidase inhibitor) + 0.291(Plasminogen activator inhibitor antagonist) -0.483(Hyperbilirubinemia) -0.292(Antiallergic) + 0.106(NumPositive) -0.527(3C-like protease (Human coronavirus) inhibitor) -0.314(Antiulcerative) + 0.269(Ribosomal protein S6 kinase. 70-kDa inhibitor) + 0.712(ATPase inhibitor) -0.308(Lipocortins synthesis antagonist) + 0.359(Paranoia) -0.423(Dipeptidyl peptidase I inhibitor) -0.196(Prostate cancer treatment) -0.383(MAP kinase 13 inhibitor) + 0.715(Thymidine kinase (Herpes simplex virus 2) inhibitor) + 0.368(Hypoglycemic) -0.564(Free fatty acid receptor 1 antagonist) + 0.268(5 Hydroxytryptamine release stimulant) + 0.54(Pyruvate dehydrogenase kinase 3 inhibitor) + 0.301(Sphingosine 1-phosphate receptor 4 antagonist) -0.534(Carbonic anhydrase stimulant) + 0.247(Imidazoleacetate 4-monooxygenase inhibitor) + 0.327(Matrix metalloproteinase 4 (membrane-type) inhibitor) + 0.231(Serine carboxypeptidase inhibitor) -0.361(Atrial natriuretic peptide antagonist) -0.212(Fibrosis treatment) -0.368(Cyclin-dependent kinase 1 inhibitor) -0.302(Akathisia) + 0.299(Cyanosis) -0.641(Glucosylceramidase inhibitor) -0.831(Dihydrodipicolinate synthase inhibitor) -0.228(ATP citrate lysase inhibitor) -0.449(UGT2B1 substrate) -0.343(Matrix metalloproteinase (membrane-type) inhibitor) + 0.18(Factor XII inhibitor) + 0.234(Protein kinase B gamma inhibitor) -0.242(CYP2B1 substrate) -0.591(Histamine H2 receptor agonist) + 0.209(ErbB-4 antagonist) + 0.8((R)-aminopropanol dehydrogenase inhibitor) + 0.271(Weight gain) -0.184(Phosphorylase kinase gamma subunit 1 inhibitor) -0.0348(NumNegative) + 0.559(UGT2B4 substrate) -0.542(Opioid delta 2 receptor antagonist) + 0.553(GABA C receptor antagonist) -0.216(5 Hydroxytryptamine 4 agonist) -0.238(Cystic fibrosis treatment) + 0.596(Geranylgeranyltransferase inhibitor) + 0.35(Sickle-cell anemia treatment) + 0.178(Neuraminidase (Influenza B) inhibitor) + 0.886(Tetracycline antiport transporter antagonist) + 0.28(Mucositis treatment) -0.147(Purinergic receptor antagonist) + 0.403(K(ir) 6.1 channel blocker) -0.168(T cell receptor antagonist) -0.361(Beta-carotene 15.15'-monooxygenase inhibitor) -0.46(Prostaglandin EP3 antagonist) + 0.259(Necrosis) -0.417(Alcohol dehydrogenase (acceptor) inhibitor) + 0.571(Motilin receptor antagonist) -0.145(Cytotoxic) -0.84(Solute carrier family 22 member 12 inhibitor) + 0.612(Plasmin inhibitor) -0.269(Integrin beta3 antagonist) -0.356(MMP9 expression enhancer) + 0.783(Succinate-CoA ligase (ADP-forming) inhibitor) -0.122(ATPase (Mitochondrial F1F0) inhibitor) -0.155(Tardive dyskinesia treatment) -0.169(Retinoic acid beta receptor agonist) + 0.209(Weakness) + 0.147(Interleukin 1 antagonist) -0.543(Heat shock protein 90 antagonist) + 0.219(Fibrinogen receptor antagonist) + 0.129(CC chemokine 4 receptor antagonist) -0.12(Apical sodium codependent bile acid transporter inhibitor) + 0.375(CYP4A11 inhibitor) -0.2(Antiprotozoal (Amoeba)) -0.177(Hypomania) + 0.299(Intestinal alkaline phosphatase inhibitor) + 0.319(Morphine 6-dehydrogenase inhibitor) + 0.962(NAD+ diphosphatase inhibitor) -9.74(Length^2) -0.45(CC chemokine receptor agonist) + 0.304(MAP kinase signal-integrating kinase 1 inhibitor) -0.208(Aurora-B kinase inhibitor) -0.563(DNA methylase inhibitor) + 0.116(Protein-tyrosine kinase (PTK. not ETK. WZC) inhibitor) -0.215(Acylphosphatase inhibitor) -0.14(AXL receptor tyrosine kinase inhibitor) -0.288(Carnosine synthase inhibitor) -0.0759(Antiviral (Rhinovirus)) -0.331(Free radical scavenger) + 0.0934(Antiosteoporotic) + 0.0985(Interleukin 5 antagonist) + 0.249(Beta-mannosidase inhibitor) -0.462(Glucan 1.4-alpha-glucosidase inhibitor) + 0.581(CYP4F substrate) -0.309(Thrombin inhibitor) -0.471(Erythropoietin receptor agonist) + 0.0977(Multidrug resistance-associated protein inhibitor) -0.0806(Glycine-tRNA ligase inhibitor) + 0.214(Sirtuin 2 inhibitor) -0.105(Tubulin antagonist) + 0.125(Clk dual-specificity kinase inhibitor) + 0.124(Plasmepsin inhibitor) -0.213(Catatonia) + 0.241(ABCG2 expression enhancer) + 0.281(SPP1 expression enhancer) + 0.114(5 Hydroxytryptamine 2 antagonist) -0.428(UDP-glucuronate decarboxylase inhibitor) -0.273(MO15-related protein kinase Pfmrk inhibitor) + 0.258(Oleamide hydrolase inhibitor) + 0.154(Carcinogenic. breast) -0.11(Phosphodiesterase 7A inhibitor) -0.139(Protein kinase C beta I inhibitor) + 0.101(Vasopressin 2 antagonist) + 0.263(Raynaud's phenomenon) -0.0919(HIV-1 integrase inhibitor) -0.0957(CYP2E1 substrate) + 0.317(Pregnane X receptor antagonist) + 0.0936(Purinergic P2X4 antagonist) + 0.0846(Carbonic anhydrase XII inhibitor) -0.26(Fatty acid oxidation inhibitor) + 0.238(Adenosine A2 receptor antagonist) + 0.082(Transcription factor STAT1 inhibitor) + 0.141(Mediator release inhibitor) -0.268(Thyroid hormone agonist) + 0.11(Nicotinic acid receptor agonist) -0.0885(Histone deacetylase 1B inhibitor) -0.09(Fatty acid elongase inhibitor) + 0.135(Janus tyrosine kinase 1 inhibitor) + 0.131(Vasodilator) -0.222(Protein-Npi-phosphohistidine-sugar phosphotransferase inhibitor) + 0.0964(Elastase 3A inhibitor) + 0.473(Caspase 8 inhibitor) -0.267(Atrolysin A inhibitor) + 0.274(Factor XIIIa inhibitor) -0.0823(Neurotrophic factor) -0.268(Melatonin 1a antagonist) + 0.0944(Enoyl-[acyl-carrier-protein] reductase (NADH) inhibitor) + 0.0411(MW) -0.216(Beta lactamase inhibitor) + 0.0989(Hematotoxic) + 0.24(Ubiquitin-protein ligase inhibitor) -0.359(P2 nucleoside transporter inhibitor) -0.311(Glucosyl transferase inhibitor) + 0.017(NumHal) -0.0817(Methylglyoxal synthase inhibitor) -0.0407(Antineoplastic) -0.196(AREG expression enhancer) -0.0872(Phosphodiesterase inhibitor) + 0.312(3-Hydroxyanthranilate 3.4-dioxygenase inhibitor) + 0.0761(Interleukin 4 antagonist) + 0.191(Formate dehydrogenase inhibitor) -0.172(Phosphodiesterase 1C inhibitor) -0.0678(Hirsutism treatment) -0.288(Diamine oxidase inhibitor) + 0.0788(Neurokinin 3 antagonist) -0.0592(T-cell protein-tyrosine phosphatase inhibitor) -0.0587(Interleukin 1b antagonist) -0.2(Alanine carboxypeptidase inhibitor) -0.0753(Melanin-concentrating hormone receptor 2 antagonist) -0.14(Trans-1.2-dihydrobenzene-1.2-diol dehydrogenase inhibitor) -0.0599(Lysophosphatidic acid 2 receptor antagonist) + 0.138(I kappa B kinase inhibitor) + 0.405(Pyruvate dehydrogenase kinase 4 inhibitor) -0.0406(Nucleoside transporters inhibitor) -0.0841(BAD expression inhibitor) + 0.132(Thromboxane A2 antagonist) + 0.0466(Ca2+/calmodulin-dependent kinase II gamma inhibitor) + 0.271(N-acylneuraminate cytidylyltransferase inhibitor) + 0.236(GABA B receptor antagonist) -0.0465(Embryotoxic) -0.198(Chitin synthase inhibitor) + 0.0466(Carbonic anhydrase VB inhibitor) -0.0329(Neuronal K-Cl cotransporter inhibitor) + 0.122(Human papillomavirus - 16 inhibitor) -0.0349(NADPH oxidase 1 inhibitor) -0.155(Cysteine synthase inhibitor) -0.156(Maleate hydratase inhibitor) + 0.0382(Protein 50S ribosomal subunit inhibitor) + 0.0813(H2AFX expression enhancer) + 0.108(CDC-like kinase 3 inhibitor) + 0.0545(Carcinogenic. mouse. female. ovary) + 0.0309(Alpha 2a adrenoreceptor antagonist) -0.0332(Phosphodiesterase 10A inhibitor) -0.0929(Purine biosynthesis inhibitor) + 0.0234(Proto-oncogene tyrosine-protein kinase Fgr inhibitor) -0.158(Methylmalonyl-CoA mutase inhibitor) + 0.0291(Pain) + 0.079(Dihydrofolate reductase (Mycobacterium avium) inhibitor) -0.0266(Vitamin D receptor antagonist) -0.0804(Lysozyme inhibitor) + 0.0676(Adenosine receptor antagonist) -0.0525(CYP1A1 inhibitor) -0.0187(Vesicle monoamine transporter inhibitor) -0.077(Lysophosphatidic acid 1 receptor antagonist) -0.0617(Purine nucleoside phosphorylase inhibitor) + 0.0196(CC chemokine 1 receptor antagonist) + 0.0146(Maillard reaction inhibitor) -0.0142(Sodium/hydrogen exchanger 2 inhibitor) -0.018(Tyrosine-protein kinase receptor antagonist) + 0.0248(5 Hydroxytryptamine 2A antagonist) -0.0659(Glycerone-phosphate O-acyltransferase inhibitor) + 0.0195(Mucomembranous protector) -0.065(GMP synthase inhibitor) -0.0367(CXC chemokine 4 receptor antagonist) + 0.0358(5 Hydroxytryptamine 1D antagonist) + 0.0134(Liver X receptor alpha agonist) -0.0146(p38 MAP kinase inhibitor) -0.015(Carcinogenic. mouse. male. kidney) + 0.0143(HIV rev inhibitor) + 0.00933(Phosphodiesterase 6D inhibitor) + 0.0189(Interleukin 10 agonist) -0.00821(Speech disturbance) + 0.018(Fructose-1.6-bisphosphatase 1 inhibitor) + 0.00572(Excitatory amino acid transporter 1 inhibitor) -0.0189(L-Serine ammonia-lyase inhibitor) + 0.0033(PDCD4 expression enhancer) -0.00312(P-glycoprotein 3 inhibitor) + 0.00224(Bombesin 3 receptor antagonist) -0.0033(Protein kinase B alpha inhibitor) + 0.00086(5 Hydroxytryptamine antagonist) + 5.64

Model 9

-0.443(Thiopurine S-methyltransferase inhibitor) + 0.0515(Acetylcholine neuromuscular blocking agent) -0.275(Amyloid beta precursor protein antagonist) + 41.6(Length^3) + 30.2(Lipophilicity) + 4.48(Length) + 0.496(Gastrointestinal disturbance) -0.935(Fumarate hydratase inhibitor) + 0.84(Arrhythmogenic) -0.553(Phosphodiesterase VIII inhibitor) -0.107(NumAcceptor) + 0.824(P3 purinoceptor-like protein antagonist) -0.0324(Agranulocytosis) + 0.133(NumAromAtoms) -0.556(Antiuremic) -0.548(Antihematotoxic) -0.000433(Carcinogenic. rat. male. nasal cavity) -0.357(Cytosol alanyl aminopeptidase inhibitor) -0.561(DNA damaging) + 0.975(1-Acylglycerol-3-phosphate O-acyltransferase inhibitor) -0.248(MAP kinase kinase 2 inhibitor) + 0.285(Ca2+/calmodulin-dependent kinase II delta inhibitor) + 0.0805(TRPM8 blocker) -0.626(Carcinogenic. rat. male) -0.579(Dopamine agonist) + 0.0851(Irritable Bowel syndrome treatment) + 0.148(Phosphoribosylglycinamide formyltransferase inhibitor) + 0.503(Carboxypeptidase U inhibitor) + 0.242(Antidiabetic symptomatic) -0.308(Collagenase 3 inhibitor) -0.133(Carbonic anhydrase IX inhibitor) -0.192(Rhinitis treatment) -0.114(Lipoprotein disorders treatment) + 1.61(TGF beta receptor type II kinase inhibitor) + 0.404(T cell inhibitor) -0.000727(Lipophilicity^3) -0.684([3-methyl-2-oxobutanoate dehydrogenase (lipoamide)]-phosphatase inhibitor) + 0.193(Carcinogenic. rat. male. skin) -1.39(Histone-lysine N-methyltransferase. H3 lysine-9 specific 3 inhibitor) -0.0447(Transcription factor inhibitor) + 0.508(Cytosolic phospholipase A2 inhibitor) + 0.578(Secretase stimulant) -0.39(Tumour necrosis factor alpha antagonist) + 0.463(Ileal bile acid transport inhibitor) + 1.26(Calmodulin-domain protein kinase 1 inhibitor) -0.228(Prostatic (benign) hyperplasia treatment) + 0.776(Intestinal alkaline phosphatase inhibitor) -0.737(Tyrosine-protein kinase ABL2 inhibitor) -0.688(Indanol dehydrogenase inhibitor) + 0.487(Vision disturbance) + 0.117(Phosphatidylinositol 3-kinase beta inhibitor) + 0.146(Macrophage colony-stimulating factor 1 receptor antagonist) + 0.0997(Nicotinic alpha4beta2 receptor agonist) + 0.817(Pain) + 0.579(Diuretic inhibitor) + 0.35(Estrogen beta receptor agonist) + 0.0864(MAPK3 expression inhibitor) -0.308(Dizziness) -0.745(Protein phosphatase 2B inhibitor) -0.477(Phosphoketolase inhibitor) -0.398(Adenosine uptake inhibitor) -0.291(Integrin beta3 antagonist) + 0.859(Pneumotoxic) -0.346(Prostaglandin F2 alpha antagonist) -24(Length^2) -0.0859(Growth stimulant) -0.139(Tubulin agonist) + 0.291(dTMP kinase inhibitor) + 0.332(Carcinogenic. rat. male. lung) -0.848(DNA methyltransferase 3B inhibitor) -0.316(CYP3A5 substrate) -0.422(DOPA decarboxylase inhibitor) + 0.332(Toxic. respiration) -0.666(Pruritus) + 0.418(Rho-associated kinase II inhibitor) -0.373(Acetylcholine release stimulant) -0.308(HIV-1 protease inhibitor) -0.705(Neuropathy treatment) + 0.269(Elastase 2B inhibitor) + 1.64(Sialidase 1 inhibitor) -0.21(Kainate receptor 5 antagonist) -0.205(CDK1/cyclin B inhibitor) + 0.53(Neurokinin 3 antagonist) + 0.48(CYP1A2 expression enhancer) -17.7(Volume^2) -0.157(Sodium/hydrogen exchanger 2 inhibitor) -0.214(Platelet aggregation inhibitor) + 0.256(Chronic obstructive pulmonary disease treatment) -0.97(Growth factor receptor-bound protein 2 antagonist) + 8.61(Volume) + 0.785(Chorismate mutase inhibitor) + 0.197(UDP-N-acetylmuramate-L-alanine ligase inhibitor) + 0.26(AMP deaminase 3 inhibitor) -0.477(Vascular endothelial growth factor 3 antagonist) -0.238(Antiviral (Hepatitis C)) -0.787(MDM2 inhibitor) + 0.155(Dermatologic) + 0.263(Matrix metalloproteinase 2 (membrane-type) inhibitor) -0.883(Dipeptidyl peptidase I inhibitor) -0.574(Antiacne) + 0.799(Ether-a-go-go potassium channel 1 blocker) + 0.64(Neuraminidase (Influenza A) inhibitor) -0.159(Purinergic P2X7 antagonist) -1.48(SMN2 expression enhancer) + 0.662(CAT expression inhibitor) -0.653(Histamine H2 receptor agonist) -0.242(Calcium-dependent phospholipase A2 inhibitor) -0.436(MAP kinase 8 inhibitor) -0.287(Immunomodulator) + 0.234(MAP kinase kinase 1 inhibitor) -1.2(Sigma 2 receptor antagonist) -0.579(Alpha.alpha-trehalose phosphorylase (configuration-retaining) inhibitor) + 0.661(Butyrylcholinesterase inhibitor) -0.478(IFITM1 expression enhancer) + 0.451(SLC7A11 expression enhancer) -0.72(Antirickettsial) + 0.247(Dipeptidyl peptidase IV inhibitor) + 0.294(Caspase 7 inhibitor) -0.242(Antihypermotility) + 0.382(Sentrin-specific protease 6 inhibitor) + 0.254(GDPD3 expression enhancer) + 0.451(Estrogen alpha receptor agonist) + 0.657(CDH1 expression enhancer) -0.267(EIF5A expression inhibitor) -0.285(Hallucinogen) -0.649(Antidepressant. Imipramin-like) -1.48(Low molecular weight phosphotyrosine protein phosphatase inhibitor) + 0.326(Anesthetic local) -0.274(Rotamase (FKBP12) inhibitor) -0.196(Tardive dyskinesia treatment) + 0.139(MW) + 0.384(Beta-D-fucosidase inhibitor) + 0.407(CDK1 expression inhibitor) + 0.171(Bradykinin B2 receptor antagonist) -0.204(Apical sodium codependent bile acid transporter inhibitor) -0.194(Teratogen) + 1(Phospholipase inhibitor) + 1.63(Procollagen-proline 3-dioxygenase inhibitor) + 0.884(5 Hydroxytryptamine 3 agonist) + 0.158(Proto-oncogene tyrosine-protein kinase Fyn inhibitor) + 0.677(SPP1 expression enhancer) -0.746(Histone deacetylase 9 inhibitor) -0.976(Aldose reductase inhibitor) -0.549(Cyclic AMP modulator) + 0.272(Carcinogenic. rat. male. liver) + 0.439(Chitinase inhibitor) -0.163(CYP1A1 substrate) -0.34(Cyclin E2 inhibitor) -0.553(O-acetylhomoserine aminocarboxypropyltransferase inhibitor) + 0.327(Protein kinase B gamma inhibitor) -0.742(UDP-glucuronate decarboxylase inhibitor) -0.161(Guanylate cyclase 1 stimulant) -0.259(Acrosin inhibitor) + 0.514(15-Lipoxygenase inhibitor) -0.363(Leucyltransferase inhibitor) + 0.153(Baculoviral IAP repeat-containing protein 2 inhibitor) -0.463(Subtilisin inhibitor) + 0.812(Phosphodiesterase VII inhibitor) -1.64(Solute carrier family 22 member 12 inhibitor) + 0.689(Corticotropin releasing factor 1 receptor antagonist) -0.299(Glycogen synthase kinase-3 alpha inhibitor) + 0.825(Carbonic anhydrase XI inhibitor) + 0.374(Glycogen synthase kinase-3 inhibitor) -0.644(Glycogen phosphorylase. muscle form inhibitor) + 0.975(Somatostatin 4 antagonist) + 0.206(Protein 50S ribosomal subunit inhibitor) -0.227(24-sterol C-methyltransferase inhibitor) -0.217(Melatonin antagonist) -0.141(Beta-adrenergic receptor kinase inhibitor) + 0.191(Caspase 9 inhibitor) -0.201(Eosinophilia) -0.276(Microtubule stabilization) + 0.696(3-Hydroxybutyrate dehydrogenase inhibitor) + 0.914(Aryl hydrocarbon receptor antagonist) + 0.197(Alpha-L-fucosidase 1 inhibitor) + 0.522(Interleukin 10 agonist) -0.232(Hypotension) + 0.0635(NumPositive) -0.255(CLU expression enhancer) + 0.624(Phosphorylase kinase inhibitor) -0.258(Ribosomal protein S6 kinase alpha 1 inhibitor) -0.395(GDF15 expression enhancer) -0.27(CYP2C8 substrate) -1.06(Isopentenyl-diphosphate DELTA-isomerase inhibitor) + 0.643(Thromboxane A2 antagonist) + 0.246(Pim-2 kinase inhibitor) + 0.375(Pyridoxal kinase inhibitor) + 0.188(Weight gain) -0.352(Splenomegaly) + 0.285(Skin irritation. weak) -0.26(Nuclear receptor subfamily 4. group A. member 2 agonist) + 0.636(Antipruritic. non-allergic) -0.339(Opioid delta receptor antagonist) -0.203(Tyrosine-protein kinase TXK inhibitor) -0.155(Purinergic P2 antagonist) + 0.158(Skeletal muscle relaxant) + 0.401(Ovulation inhibitor) -0.162(Antineoplastic (lymphocytic leukemia)) + 0.276(Vesicle monoamine transporter 2 inhibitor) -0.617(Lysozyme inhibitor) -0.309(Dopamine D4 agonist) + 0.191(Mood disorders treatment) + 0.206(Phosphodiesterase 6D inhibitor) -0.621(HSD17B1 expression enhancer) + 0.673(MAP3K10 inhibitor) + 0.25(Alpha 1b adrenoreceptor antagonist) + 0.786(Adenosine A3 receptor agonist) + 0.753(Dihydrofolate reductase (Mycobacterium avium) inhibitor) + 0.414(Formate dehydrogenase inhibitor) -0.189(Fasciculation) + 0.193(Phosphoglycerate kinase 2 inhibitor) + 0.453(Antibiotic) + 1.15(CYP27 substrate) -0.579(Perilipin-1 inhibitor) + 0.665(6.7-Dihydropteridine reductase inhibitor) + 0.0977(Interleukin 1 antagonist) -0.318(Aryl sulfotransferase inhibitor) + 0.467(Sulfinoalanine decarboxylase inhibitor) -0.177(Epithelial sodium channel blocker) -0.217(Estrogen antagonist) -0.405(AMPA 2 receptor antagonist) + 0.154(Antineoplastic (colorectal cancer)) + 0.163(Opioid agonist) + 0.19(Sirtuin inhibitor) -0.258(Non-steroidal antiinflammatory agent) -0.274(Hyperkinesia) -0.326(TGFB1 expression enhancer) + 0.099(Fusion protein inhibitor) + 0.297(Ribonucleoside triphosphate reductase inhibitor) -0.154(Peptidyl-prolyl cis-trans isomerase FKBP4 inhibitor) -0.137(Beta 3 adrenoreceptor agonist) + 0.165(Endometrios treatment) -0.0954(Topoisomerase II beta inhibitor) + 0.524(Histone deacetylase class I inhibitor) + 0.528(Human papillomavirus - 16 inhibitor) + 0.511(NMDA receptor subunit 3A antagonist) + 0.164(Immunosuppressant) + 0.0382(NumDonor) + 0.26(Pectin lyase inhibitor) -0.143(Melanin-concentrating hormone receptor 1 antagonist) -0.146(Phosphodiesterase 7A inhibitor) -0.376(Aspartate ammonia-lyase inhibitor) -0.173(CYP3A4 expression enhancer) + 0.328(Phosphoenolpyruvate carboxykinase (GTP) inhibitor) + 0.799(N-acylneuraminate cytidylyltransferase inhibitor) -0.126(Lipocortins synthesis antagonist) -0.723(Purine nucleosidase inhibitor) -0.328(G-protein-coupled receptor kinase inhibitor) + 0.627(Nucleotidyltransferase (FIV) inhibitor) -0.401(RNA synthesis inhibitor) -0.575(Phosphoglycerate kinase inhibitor) -0.399(Glutathione synthase inhibitor) -0.431(Vascular adhesion protein 1 inhibitor) -0.288(Genotoxic) -0.434(Fructose-1.6-bisphosphatase 1 inhibitor) + 0.137(Dysarthria) + 0.325(Adenylate cyclase inhibitor) + 0.14(Insulin antagonist) -0.302(Oxytocin agonist) -0.181(Urinary retention) -0.129(Retinoid X receptor agonist) -0.735(Histone deacetylase 10 inhibitor) -0.133(Proto-oncogene tyrosine-protein kinase c-hck inhibitor) + 0.0881(Radical formation agonist) + 0.22(NR0B2 expression enhancer) + 0.125(CYP11B2 inhibitor) -0.541(N-acetylglucosamine kinase inhibitor) + 0.242(Polyamine oxidase inhibitor) + 0.068(Antiviral (HIV)) + 0.261(Oxytocic) + 0.232(Phosphoinositide 5-phosphatase inhibitor) -0.287(Thrombopoietin agonist) -0.224(Thrombin inhibitor) + 0.0705(ESR2 expression inhibitor) + 0.15(Ulceration) + 0.275(UGT2B17 substrate) -0.259(Chemokine receptor agonist) -0.308(NRIP1 expression enhancer) + 0.0711(Plasma kallikrein inhibitor) -0.138(PPARA expression enhancer) + 0.225(Adenylate cyclase III inhibitor) -0.161(Photosensitizer) + 0.116(CDKN1A expression enhancer) + 0.0946(Nicotinic acid receptor agonist) -0.0125(NumNegative) + 0.0574(Antineoplastic (liver cancer)) -0.0798(Cyclooxygenase 3 inhibitor) -0.562(Carbonic anhydrase VI inhibitor) + 0.302(MAP-kinase-activated kinase 1 inhibitor) + 0.288(Carbonic anhydrase VA inhibitor) -0.0955(Prolactin release inhibitor) -0.264(Nicotinic receptor gamma subunit antagonist) -0.263(SULT1A1 substrate) + 0.263(Urotensin II agonist) + 0.072(Farnesoid X receptor agonist) + 0.408(Carbonic anhydrase V inhibitor) + 0.195(AMP-activated protein kinase stimulant) -0.0833(Sphingosine kinase 1 inhibitor) -0.402(Somatostatin 3 antagonist) -0.145(Acid phosphatase inhibitor) + 0.0738(Integrin alphaVbeta6 antagonist) -0.122(Mutagenic) + 0.14(Baculoviral IAP repeat-containing protein 3 inhibitor) -0.108(Carcinogenic. mouse. female. stomach) + 0.187(D-lactaldehyde dehydrogenase inhibitor) -0.264(2-Oxoaldehyde dehydrogenase (NAD+) inhibitor) + 0.155(Carnitine 3-dehydrogenase inhibitor) + 0.049(DNA polymerase I inhibitor) + 0.0578(Neurotoxic) -0.196(Integrin alpha2beta1 antagonist) -0.0631(Antipsychotic) + 0.172(Trypsin inhibitor) -0.0585(Hepatotoxic) -0.107(CYP3A inducer) -0.113(Nitrite reductase [NAD(P)H] inhibitor) + 0.0633(Paranoia) + 0.0586(Protein kinase (CK1) gamma 2 inhibitor) -0.0277(CYP2C9 inhibitor) + 0.196(Acyl-CoA dehydrogenase (NADP+) inhibitor) -0.0774(Vesicle monoamine transporter inhibitor) + 0.0745(Metalloproteinase-2 inhibitor) + 0.0796(CYP2D6 inhibitor) -0.0822(CYP2A1 substrate) -0.105(Shal potassium channel blocker) + 0.0352(M18 aspartyl aminopeptidase inhibitor) -0.0413(HCV NS3-helicase inhibitor) -0.179(Kexin inhibitor) -0.0294(Pulmonary hypertension treatment) + 0.114(Transcription factor NF kappa B2 inhibitor) + 0.0482(Cytoprotectant) + 0.144(UGT2B7Y substrate) -0.0518(FMO3 substrate) -0.0307(Plasmepsin I inhibitor) + 0.0302(Hypothermic) -0.0241(TRPA1 antagonist) -0.0474(Matrix metalloproteinase (membrane-type) inhibitor) + 0.0205(Antibiotic Oxacephem-like) + 0.0355(Carcinogenic. rat. male. stomach) -0.0723(Antihypertriglyceridemic) -0.0342(Cyclin-dependent kinase 1 inhibitor) -0.058(Dihydropteroate synthase inhibitor) -0.0507(Alpha adrenoreceptor agonist) + 0.0183(Cyclic GMP phosphodiesterase inhibitor) + 0.0679(AMP-activated protein kinase. alpha-2 subunit inhibitor) -0.0263(Skin irritation. high) + 0.0632(Peptidyl-glycinamidase inhibitor) -0.0374(Melanin-concentrating hormone receptor antagonist) + 0.018(CYP1B1 substrate) + 0.0222(Carcinogenic. rat. female. all tumor bearing animals) + 0.0679(Thymidine kinase 1 inhibitor) -0.0826(5'-Nucleotidase inhibitor) -0.0347(Delta-5 fatty acid desaturase inhibitor) -0.00978(HIV attachment inhibitor) + 0.0113(Deoxynucleoside kinase inhibitor) + 0.0263(Intermittent claudication treatment) + 0.0214(MMP2 expression inhibitor) -0.034(Cyclooxygenase substrate) + 0.0103(Angiotensin agonist) -0.0111(Antimycobacterial) + 0.0169(Caspase 3 inhibitor) -0.00758(Chemokine receptor antagonist) -0.0053(Antimitotic) + 0.0131(Narcotic) + 0.0153(Cytokine modulator) + 0.00348(CYP3A5 expression enhancer) -0.0316(Ribulose-bisphosphate carboxylase inhibitor) -0.0141(Agaritine gamma-glutamyltransferase inhibitor) + 0.00372(Estrogen agonist) + 0.00365(Radioprotector) -0.00192(Antiemphysemic) + 6.06

Model 10

+ 0.655(CYP2D6 substrate) -1.67(Cytosol alanyl aminopeptidase inhibitor) -0.366(MAP kinase kinase 2 inhibitor) + 0.188(NumAromAtoms) + 0.0844(Sodium/calcium exchanger 1 inhibitor) + 0.493(CYP1A1* substrate) -0.441(Carbonic anhydrase II stimulant) + 4.87(Length) -0.296(Phosphodiesterase V inhibitor) + 0.681(Arrhythmogenic) -0.116(NumAcceptor) + 0.863(Endothelial nitric-oxide synthase inhibitor) -0.453(Rhinitis) -0.232(Benzodiazepine agonist) -0.168(Protein-tyrosine phosphatase 1B inhibitor) + 0.297(CYP3A5 expression enhancer) + 0.177(Apnea) + 0.68(Gynecological disorders treatment) -0.683(Dermatitis) + 0.188(Carnitine palmitoyltransferase inhibitor) + 0.129(L-threonine 3-dehydrogenase inhibitor) + 0.497(Carcinogenic. rat. male. lung) -0.607(Antihistaminic) -0.0169(CYP3A4 substrate) -0.672(Leucyltransferase inhibitor) + 0.182(Isocitrate lyase inhibitor) -0.584(Phosphodiesterase VIII inhibitor) + 0.392(Ceramide glucosyltransferase inhibitor) + 0.815(Sulfinoalanine decarboxylase inhibitor) -0.611(Matrix metalloproteinase 3 (membrane-type) inhibitor) -0.72(Phosphodiesterase 1C inhibitor) + 0.419(Antidepressant) -0.893(Glutathione S-transferase substrate) + 0.212(Bombesin antagonist) -0.615(Chelator. Iron) -0.552(Prostatic (benign) hyperplasia treatment) + 2.82(Sialidase 1 inhibitor) + 0.308(Ocular toxicity) -1.34(Photinus-luciferin 4-monooxygenase (ATP-hydrolysing) inhibitor) + 1.65(Colony stimulating factor agonist) -0.000685(Lipophilicity^3) + 0.327(Caspase 7 inhibitor) + 1.51(CDC-like kinase 3 inhibitor) -0.37(Prostaglandin-E2 synthase 1 inhibitor) + 0.599(Acyl-CoA dehydrogenase (NADP+) inhibitor) -0.785(Alpha-1.3-mannosyl-glycoprotein 2-beta-N-acetylglucosaminyltransferase inhibitor) -0.272(CYP3A4 inhibitor) + 0.982(15-Lipoxygenase inhibitor) -0.535(Cystic fibrosis treatment) + 0.253(Protein kinase C nu inhibitor) + 0.229(Bone formation stimulant) -1.07(Antihematotoxic) -0.746(SUMO-activating enzyme subunit 1 inhibitor) -0.123(Antitussive. narcotic) + 0.145(Spasmolytic) -0.248(Carcinogenic. mouse. female. liver) -0.739(Shaker potassium channel blocker) -2.4(N-formylglutamate deformylase inhibitor) -0.19(Keratolytic) -0.42(Nicotinamidase inhibitor) + 0.162(Alpha-L-fucosidase 1 inhibitor) + 0.163(NumPositive) + 0.327(Ribosomal protein S6 kinase 1. 70-kDa inhibitor) + 0.352(Anthranilate 3-monooxygenase (deaminating) inhibitor) -0.19(Inflammation) -0.6(5 Hydroxytryptamine 2 agonist) + 10.1(Lipophilicity) + 0.68(Prostaglandin-E synthase inhibitor) -0.145(Purinergic receptor antagonist) + 0.995(Oxytocic) + 0.328(Cytoprotectant) -0.806(4-Hydroxy-2-oxoglutarate aldolase inhibitor) + 0.434(Glyceraldehyde-3-phosphate dehydrogenase inhibitor) -0.311(Uterine stimulant) + 0.407(Dyskinesia) + 0.419(MYC expression enhancer) -0.187(NGFR expression enhancer) + 0.34(Caspase 9 inhibitor) -0.171(Botulinum neurotoxin type A inhibitor) + 0.271(Chronic obstructive pulmonary disease treatment) + 0.326(Corneal wound healing stimulator) -0.86(Mannosyl-oligosaccharide glucosidase inhibitor) + 0.162(Adenosine A2a receptor agonist) + 0.0938(Carcinogenic. rat. female. vascular system) -0.352(CYP2E substrate) -0.465(Mydriatic) -11.3(Volume^2) + 0.437(Cyclin-dependent kinase 7 inhibitor) + 0.154(DNA helicase inhibitor) + 0.826((R)-aminopropanol dehydrogenase inhibitor) + 0.393(CNS active muscle relaxant) + 0.881(3-Hydroxybutyrate dehydrogenase inhibitor) -0.234(Histone deacetylase class III inhibitor) -0.655(CDC25C inhibitor) -0.344(CYP2C19 substrate) + 0.63(Pyruvate dehydrogenase stimulant) -0.207(Antidiuretic hormone agonist) + 0.142(Myocarditis) -1.22(UGT2B20 substrate) + 0.705(Beta adrenoreceptor antagonist) -0.648(Potassium channel (Ca-activated) activator) + 0.217(Hepatic disorders treatment) -0.345(Hexokinase stimulant) -0.347(Pyruvate dehydrogenase kinase inhibitor) -0.281(5 Hydroxytryptamine 1F agonist) + 0.136(Apyrase inhibitor) + 0.162(Thiazolidinedione) + 0.252(Death-associated protein kinase 3 inhibitor) -0.863(Glycine C-acetyltransferase inhibitor) -0.744(Nicotinate phosphoribosyltransferase inhibitor) -0.715(Melatonin 2 agonist) -0.136(Antiviral (Rhinovirus)) -0.227(Antineoplastic (lymphocytic leukemia)) + 0.319(CYP19A1 expression inhibitor) + 8.4(Volume) + 0.658(Diabetic neuropathy treatment) -0.3(Antirickettsial) + 0.209(Prolyl aminopeptidase inhibitor) + 0.637(Phosphorylase a inhibitor) -0.272(Phosphatidylinositol 3-kinase alpha inhibitor) -0.442(Heat shock protein 70 agonist) + 0.384(Opioid kappa 2b receptor antagonist) + 0.532(CYP2G1 substrate) + 0.311(Neurotensin receptor agonist) -0.155(Antihypertensive) -0.274(Anti-Helicobacter pylori) -0.163(COL1A1 expression enhancer) + 0.255(Estrogen agonist) -0.196(Toll-Like receptor antagonist) + 0.425(Proliferative diseases treatment) -1.21(Beta 2 adrenoreceptor agonist) + 0.298(DNA gyrase subunit A inhibitor) -0.489(4-Hydroxy-4-methyl-2-oxoglutarate aldolase inhibitor) -0.447(Transforming growth factor antagonist) -0.174(Ribosomal protein S6 kinase alpha 2 inhibitor) + 0.249(Sweating) -0.231(Check point kinase inhibitor) + 0.593(Alanine transaminase inhibitor) + 0.226(ALK inhibitor) -0.201(EIF5A expression inhibitor) + 0.247(MAP kinase kinase 1 inhibitor) + 0.239(Phosphodiesterase 6H inhibitor) -0.624(Antineoplastic antimetabolite) -0.157(Pruritus) -0.228(Gastrointestinal hemorrhage) -0.81(Orotate phosphoribosyltransferase inhibitor) -0.181(Prokinetic) + 1.23(NAD+ diphosphatase inhibitor) + 0.109(Antineoplastic (brain cancer)) + 0.294(Erythema) -0.277(FMO1 substrate) -0.808(Vitamin) -0.183(Glycine receptor agonist) + 0.197(Cannabinoid CB2 receptor agonist) + 0.263(Hydroxymethylbilane synthase inhibitor) + 0.222(Bulimia treatment) + 0.355(AMP-activated protein kinase. gamma-1 subunit inhibitor) + 0.497(CXC chemokine 1 receptor antagonist) -0.169(Plasminogen activator inhibitor) + 0.14(Angiogenesis inhibitor) + 0.269(Protein kinase C mu inhibitor) + 0.229(BCL2 expression inhibitor) -0.349(Glutathione reductase inhibitor) + 0.303(Alkaline phosphatase inhibitor) + 0.477(Succinate-semialdehyde dehydrogenase inhibitor) -0.106(Allergic dermatitis) + 0.6(CYP4B substrate) + 0.648(MAP3K11 inhibitor) + 0.163(Integrin alphaVbeta6 antagonist) -0.159(Cyclin-dependent kinase 5 inhibitor) + 0.263(Irritation) + 0.403(Secretase beta 1 inhibitor) -0.35(PPARG expression enhancer) -0.124(Antiprotozoal (Plasmodium)) -0.21(11-Beta-hydroxysteroid dehydrogenase 1 inhibitor) -0.215(Secretory phospholipase A2 inhibitor) -0.246(Aurora-B kinase inhibitor) + 0.229(Glycogen synthase kinase-3 inhibitor) + 0.371(Protein-tyrosine phosphatase LC-PTP inhibitor) + 0.119(HCV NS5A inhibitor) -0.26(MAP kinase 7 inhibitor) + 0.159(Cytosolic phospholipase A2 beta inhibitor) + 0.284(Inotropic) -0.568(GABA transporter 1 inhibitor) + 0.487(Phospholipase inhibitor) + 0.517(Progesterone receptor B1 antagonist) -0.252(Cerebral hemorrhage) -0.416(NOS2 expression inhibitor) -0.463(Corticotropin releasing factor antagonist) -0.396(Excitatory amino acid transporter 2 inhibitor) -0.151(Microtubule stabilization) -0.517(Melatonin 1a antagonist) -0.204(Methemoglobinemia) + 0.325(NOS2 expression enhancer) + 0.282(Chloride/bicarbonate exchanger inhibitor) + 0.357(GABA A receptor agonist) -0.177(AKR1C1 expression enhancer) + 0.102(Antineoplastic (endocrine cancer)) -0.255(FMO3 substrate) + 0.149(Antiseborrheic) + 0.336(Fibrinogen beta chain inhibitor) + 0.0611(MW) -0.182(Complement C3a chemotactic receptor antagonist) -0.154(CYP2B substrate) + 0.124(ATP-dependent RNA helicase inhibitor) + 0.111(Proteasome subunit beta type-5 inhibitor) + 0.332(FMN reductase inhibitor) + 0.15(Estrone sulfotransferase stimulant) -0.0842(Niemann-Pick C1-like 1 protein antagonist) -0.298(Dipeptidyl peptidase I inhibitor) -0.103(Antibiotic Penem-like) -0.118(Janus tyrosine kinase 2 inhibitor) -0.155(Electron transport complex I inhibitor) + 0.049(Apoptosis agonist) -0.231(Contraceptive) + 0.143(Ca2+/calmodulin-dependent kinase II beta inhibitor) + 0.0912(Cathepsin V inhibitor) -0.156(Splenomegaly) -0.38(Melatonin 5 antagonist) + 0.273(Histamine H2 receptor antagonist) + 0.405(Succinate-CoA ligase (ADP-forming) inhibitor) + 0.125(Hyperglycemic) + 0.0823(HIF1A expression inhibitor) + 0.111(Prostaglandin E2 agonist) -0.165(UGT1A1 expression enhancer) -0.143(Protein kinase C gamma inhibitor) + 0.106(Pyrimidine antagonist) + 0.172(5 Hydroxytryptamine agonist) -0.114(CDK1/cyclin B inhibitor) + 2.57(Length^3) + 0.457(Tetracycline antiport transporter antagonist) -0.102(Nicotinamide phosphoribosyltransferase inhibitor) + 0.319(Hypertrichosis) -0.378(P2 nucleoside transporter inhibitor) -0.302(5-Alpha-reductase 1 inhibitor) + 0.3(Histone deacetylase class I inhibitor) + 0.0743(K(ir) 6.2 channel activator) + 0.279(Somatostatin 4 antagonist) + 0.101(Protein kinase B inhibitor) + 0.291(Cytochrome c oxidase inhibitor) + 0.212(Formate-dihydrofolate ligase inhibitor) -0.188(Heat shock protein 90 alpha antagonist) -0.484(Adenylylsulphatase inhibitor) + 0.146(GSTP1 expression enhancer) + 0.0733(MAP kinase kinase 7 inhibitor) -0.098(AXL receptor tyrosine kinase inhibitor) -0.0829(T-cell protein-tyrosine phosphatase inhibitor) + 0.161(Anticataract) + 0.153(CYP1B1 expression enhancer) -0.448(Aminopeptidase I inhibitor) + 0.095(Fibrinogen receptor antagonist) -0.0861(Estrogen receptor beta antagonist) -0.079(Ribosomal protein S6 kinase. 90-kDa inhibitor) -0.11(Acylaminoacyl-peptidase inhibitor) -0.0968(Non-steroidal antiinflammatory agent) -0.218(L-Serine ammonia-lyase inhibitor) + 0.261(CYP24 inhibitor) -0.291(Kainate receptor agonist) + 0.194(Peptidyl-glycinamidase inhibitor) -0.0537(Thymidine kinase 2 inhibitor) + 0.124(Dimethylallyltranstransferase inhibitor) -0.0693(Bradykinin B1 receptor antagonist) -0.135(Obsessive-compulsive disorder treatment) -0.193(CYP1B1 inhibitor) -0.121(Sentrin-specific protease 7 inhibitor) -0.192(Histone deacetylase 10 inhibitor) -0.0945(Hypercholesterolemic) + 0.056(TRKB antagonist) + 0.0705(Peroxisome proliferator-activated receptor delta antagonist) -0.059(Lipocortins synthesis agonist) -0.0935(Phosphodiesterase 5A inhibitor) + 0.0482(Protein-tyrosine phosphatase inhibitor) -0.056(Hypogonadism treatment) -0.0644(Hyponatremia) + 0.054(Sentrin-specific protease 6 inhibitor) + 0.0553(Neurokinin antagonist) -0.0333(Prostate cancer treatment) -0.0856(CCND3 expression inhibitor) + 0.139(Membrane dipeptidase inhibitor) + 0.0942(Piloerection) + 0.163(Carbonic anhydrase inhibitor) + 0.0699(NUPR1 expression enhancer) + 0.0605(Corticosteroid-like) -0.0582(MAP kinase 13 inhibitor) -0.0511(Carcinogenic. mouse. male. harderian gland) + 0.0558(Ribonucleoside-diphosphate reductase large chain inhibitor) -0.0378(cGMP-dependent protein kinase 1 alpha inhibitor) + 0.0356(Vasopressin 1 antagonist) -0.0332(Sarcopenia treatment) -0.1(Estrogen-related receptor alpha antagonist) + 0.0225(Lipophilicity^2) -0.0248(HIV-1 integrase inhibitor) + 0.0408(Phosphodiesterase 11A inhibitor) + 0.103(Aminopeptidase microsomal inhibitor) + 0.166(Fibrinogen inhibitor) -0.044(CASP9 expression enhancer) + 0.0259(Proto-oncogene tyrosine-protein kinase Fgr inhibitor) + 0.0791(Candidapepsin inhibitor) -0.0285(Dopamine autoreceptor agonist) + 0.0179(Antileukemic) -0.0612(Aryl sulfotransferase inhibitor) -0.0319(Cyclin-dependent kinase 2 inhibitor) + 0.115(CYP27A substrate) + 0.0557(Dopamine D2S antagonist) -0.0189(Potassium channel blocker) + 0.0196(Carbonic anhydrase XII inhibitor) -0.0862(Dopamine D2B antagonist) -0.0191(Carbonyl reductase [NADPH] 1 inhibitor) + 0.00548(NumDonor) + 0.0497(Purinergic P2X2 antagonist) -0.0646(5-Alpha-reductase inhibitor) + 0.0431(Coproporphyrinogen oxidase inhibitor) + 0.0732(2-Isopropylmalate synthase inhibitor) -0.0419(Peptidyl-Lys metalloendopeptidase inhibitor) -0.00579(Antiinflammatory) + 0.0211(Orexin receptor 1 antagonist) -0.0175(IL6 expression inhibitor) + 0.00822(IGFBP4 expression enhancer) -0.00917(Amino acid-polyamine-organocation (APC) transporter antagonist) -0.00786(Cyclic AMP phosphodiesterase inhibitor) -0.017(Tripeptidyl-peptidase I inhibitor) -0.00674(Protein kinase (CK1) epsilon inhibitor) -0.00384(Anticonvulsant) + 0.0198(Alpha.alpha-trehalase inhibitor) + 0.00456(Prostaglandin EP12 antagonist) -0.00292(Dry eye syndrome treatment) + 0.00353(MAP kinase kinase kinase inhibitor) + 0.00187(Transcription factor STAT1 inhibitor) -0.00393(Polo-like kinase-1 inhibitor) -0.0019(Antianorexic) + 0.00286(MAP kinase kinase inhibitor) + 0.000583(Carbonic anhydrase III inhibitor) + 0.000389(Leukotriene C antagonist) + 5.97

Model 11

+ 0.117(Antiparkinsonian. rigidity relieving) -0.619(Cystathionine gamma-lyase inhibitor) -0.522(Length) + 0.441(CYP2B6 substrate) -0.147(Angiotensin antagonist) + 0.164(Neutropenia) + 23.5(Lipophilicity) + 0.056(CYP2C10 substrate) -1(Antihematotoxic) + 1.83(Tyrosine transaminase inhibitor) + 0.165(Lipophilicity^2) + 0.387(Phospholipase A1 inhibitor) -0.277(Glycine receptor agonist) -0.872(Thyroid hormone agonist) -0.156(Aggrecanase 2 inhibitor) + 0.138(NumAromAtoms) + 0.0322(Imidazoline receptor antagonist) -1.23(N4-(beta-N-acetylglucosaminyl)-L-asparaginase inhibitor) -0.0588(AICAR transformylase inhibitor) + 0.434(Pantothenase inhibitor) + 0.0794(Nephritis) -1.04(Glycerate kinase inhibitor) -0.139(Antiulcerative) + 2.32(Sialidase 1 inhibitor) -0.648(Nephrotoxic) -0.00303(Carcinogenic. mouse. male. lung) + 0.00315(Acetolactate decarboxylase inhibitor) -0.707(Phenylalanine-tRNA ligase inhibitor) + 0.145(Cardiotoxic) + 0.0365(Tumour necrosis factor antagonist) + 0.37(Rho-associated kinase inhibitor) + 0.376(Antibiotic Cephalosporin-like) -0.198(Platelet aggregation inhibitor) + 0.399(Immunosuppressant) + 0.119(Microbial collagenase inhibitor) -0.0275(Matrix metalloproteinase 3 (membrane-type) inhibitor) -0.528(Pyruvate dehydrogenase kinase inhibitor) -0.401(Steroid 17-alpha-hydroxylase/17.20 lyase inhibitor) -0.273(CYP1A2 substrate) + 0.57(Tremor) + 0.323(Antidiabetic symptomatic) -0.383(Endothelin receptor antagonist) -0.575(GPX2 expression enhancer) -0.246(Amiloride-sensitive cation channel 1 blocker) + 0.467(Endometrios treatment) + 0.446(CYP1A1* substrate) -0.198(Glucose-1.6-bisphosphate synthase inhibitor) -0.43(Hexokinase stimulant) + 13.9(Volume) -0.226(MAO inhibitor) -1.95(Vitamin) + 0.448(Ototoxicity) + 0.0468(Antineoplastic (bone cancer)) + 0.57(Coagulant) + 0.68(Anticholelithogenic) -0.24(Melatonin 1 agonist) + 0.237(Fibroblast activation protein alpha inhibitor) + 0.297(Cataract) -0.448(Dynamin GTPase inhibitor) -0.773(Cholesterol antagonist) -0.65(SFN expression enhancer) -0.3(Prostate disorders treatment) + 0.282(Bone formation stimulant) -0.291(Antimetastatic) -0.61(CYP2B1 substrate) -0.379(Aminopeptidase A inhibitor) + 0.335(FOSL1 expression enhancer) -0.669(AKR1C1 expression enhancer) + 0.45(Ileal bile acid transport inhibitor) + 0.408(Sirtuin 2 inhibitor) -0.379(DNA damaging) + 0.39(UDP-N-acetylmuramate-L-alanine ligase inhibitor) + 1.04(TGF beta receptor type II kinase inhibitor) + 0.104(DNA primase inhibitor) -0.071(NumAcceptor) + 0.807(IL4 expression enhancer) -0.456(Leukopenia) + 0.309(Postmenopausal disorders treatment) + 0.936(Sulfinoalanine decarboxylase inhibitor) + 0.339(Granulocyte stimulating factor agonist) -0.222(Glutamate (mGluR5) agonist) -0.131(Leucyltransferase inhibitor) + 0.1(Antiparkinsonian) + 0.511(MYC expression enhancer) + 0.362(ABCB1 expression enhancer) + 0.208(Alpha 1a adrenoreceptor agonist) -0.209(Prostaglandin F2 alpha antagonist) -0.388(Cyclin D3 inhibitor) -0.947(MAO B inhibitor) -0.457(Serine/threonine-protein kinase WEE1 inhibitor) -0.794(Aspartate carbamoyltransferase inhibitor) -0.928(Neuropathy treatment) + 0.465(Plasminogen activator inhibitor antagonist) + 0.768(Alanine transaminase inhibitor) -0.369(Phosphodiesterase II inhibitor) + 0.753(CDC-like kinase 3 inhibitor) -0.783(Melatonin 5 antagonist) + 0.503(Dopamine D2S antagonist) + 0.209(Carcinogenic. rat. female. all tumor bearing animals) + 0.76(Retinyl-palmitate esterase inhibitor) + 0.247(Tyk2 inhibitor) + 1.8(CYP27 substrate) -0.63(Gastrointestinal hemorrhage) + 0.885(Hematopoietic) + 0.377(Histone deacetylase 8 inhibitor) + 0.242(Excitability) + 0.738(DNA methyltransferase I inhibitor) -0.271(Keratoses actinic (solar) treatment) -0.176(GST P1-1 substrate) + 0.39(Cardiodepressant) -1.44(Kainate receptor agonist) + 0.292(Phosphodiesterase 6C inhibitor) + 0.254(Adenylate cyclase IV inhibitor) + 0.184(Angiogenesis stimulant) + 0.184(12-Lipoxygenase inhibitor) + 0.863(Sodium/hydrogen exchanger 3 inhibitor) + 0.281(Phosphate transporter inhibitor) -0.303(Platelet antagonist) -0.107(Protein kinase (CK2) beta inhibitor) + 0.651(Pneumotoxic) -0.555(Putrescine oxidase inhibitor) -0.27(Vitamin D receptor antagonist) -0.563(Nicotinic neuronal receptor agonist) + 0.504(Raynaud's phenomenon) -1.01(Histone-lysine N-methyltransferase. H3 lysine-9 specific 3 inhibitor) + 0.494(Phospholipase D inhibitor) -1.06(Polyamine biosynthesis inhibitor) -0.844(Excitatory amino acid transporter 3 inhibitor) -0.339(Histamine release inhibitor) -0.316(Platelet activating factor alpha antagonist) -0.96(UDP-glucuronosyltransferase 2B7 inhibitor) -0.391(Janus tyrosine kinase 2 inhibitor) + 8.56(Length^3) + 0.219(Toxic. vascular) + 0.271(SOX4 expression inhibitor) + 0.143(Candidapepsin 2 inhibitor) + 0.688(Dihydrofolate reductase (Mycobacterium avium) inhibitor) -0.24(11-Beta-hydroxysteroid dehydrogenase 1 inhibitor) + 0.723(Narcolepsy treatment) + 0.164(Gout treatment) + 0.714(Phosphorylase a inhibitor) + 0.168(Carcinogenic. rat. male. kidney) + 0.685(NAD(P)+ transhydrogenase (AB-specific) inhibitor) -0.169(Hirsutism treatment) + 0.231(Signal transduction pathways inhibitor) -0.528(Matrix metalloproteinase (membrane-type) inhibitor) -0.308(SLC7A5 expression enhancer) -0.199(Protein-tyrosine phosphatase 1B inhibitor) -0.308(CYP3A4 substrate) -0.427(Analgesic stimulant) -0.402(5-Alpha-reductase 1 inhibitor) -0.748(3-Dehydroquinate synthase inhibitor) -0.149(Cyclin-dependent kinase 5 activator 1 inhibitor) + 0.458(Collagenase inhibitor) + 0.153(Transcription factor STAT1 inhibitor) -0.646(Ethanolamine kinase inhibitor) + 0.487(Beta galactosidase inhibitor) + 0.0903(Antiobesity) -0.194(DNA polymerase III inhibitor) + 0.708(Theanine hydrolase inhibitor) -8.09(Volume^2) -0.156(5 Hydroxytryptamine 4E antagonist) -0.134(Renal failure treatment) + 0.112(Estrogen-related receptor beta antagonist) + 0.764(Arachidonic acid antagonist) -0.377(Acid phosphatase inhibitor) -0.161(Jaundice) + 0.362(Ulcer. peptic) -0.495(Beta 2 adrenoreceptor agonist) -0.22(Leukotriene B4 receptor 2 antagonist) + 0.194(Alpha adrenoreceptor antagonist) -0.145(Protein kinase (CK1) epsilon inhibitor) -0.3(P-glycoprotein 1 inhibitor) -0.367(Hypoxia inducible factor 1 alpha inhibitor) -0.463(Phosphoserine phosphatase inhibitor) -0.186(Ribosomal protein S6 kinase alpha 4 inhibitor) + 0.151(Cachexia treatment) + 0.166(Bulimia treatment) -0.66(CYP24 substrate) -0.12(Cyclin-dependent kinase 6 inhibitor) + 0.156(Gastrointestinal disorders treatment) + 0.115(Protein 30S ribosomal subunit inhibitor) + 0.136(Antineoplastic (colon cancer)) + 0.1(Spasmogenic) + 0.322(CYR61 expression enhancer) + 0.405(Anticataract) -0.211(MAP kinase 12 inhibitor) + 0.148(Antineurogenic pain) -0.337(Glutathione reductase inhibitor) -0.754(Cyclomaltodextrin glucanotransferase inhibitor) -0.252(Aryl-alcohol dehydrogenase inhibitor) + 0.238(NUPR1 expression enhancer) -0.335(IFITM1 expression enhancer) + 0.123(Thyroid hormone alpha antagonist) + 0.16(Caspase 9 inhibitor) -0.464(Potassium channel Kv4.3 blocker) -0.163(CYP2C9 inducer) + 0.161(Ca2+/calmodulin-dependent kinase II inhibitor) -0.205(Mutagenic) + 0.286(Inosine monophosphate dehydrogenase 2 inhibitor) + 0.893(Procollagen-proline 3-dioxygenase inhibitor) -0.129(Fibroblast growth factor antagonist) -0.181(Retinoic acid receptor antagonist) + 0.103(Serine-sulfate ammonia-lyase inhibitor) -0.17(Hypomania) -0.103(Antineoplastic (lymphocytic leukemia)) + 0.488(Antineoplastic (insulinoma)) + 0.126(Alpha-L-fucosidase 1 inhibitor) -0.0239(NumNegative) + 0.168(MAP kinase 1 inhibitor) + 0.0549(NumPositive) -0.501(Arginine decarboxylase inhibitor) -0.281(AKR1C2 expression enhancer) + 0.209(Carcinogenic. rat. female. vascular system) -0.272(Cathepsin S inhibitor) -0.122(Poly(ADP-ribose) polymerase 1 inhibitor) -0.115(Apical sodium codependent bile acid transporter inhibitor) + 0.125(Peroxisome proliferator-activated receptor agonist) -0.454(Dihydrofolate synthase inhibitor) + 0.0939(Pancreatic disorders treatment) + 0.0208(NumHal) + 0.312(FMN reductase inhibitor) + 0.471(Proto-oncogene protein c-fos inhibitor) + 0.303(Corticotropin releasing factor 1 receptor antagonist) + 0.215(AR expression inhibitor) + 0.137(HCV NS5A inhibitor) + 0.14(Weight gain) + 0.0968(Histone deacetylase stimulant) -0.126(Ribosomal protein S6 kinase alpha 3 inhibitor) + 0.134(Nitrilase inhibitor) + 0.334(Oligo-1.6-glucosidase inhibitor) -0.295(Potassium channel (Voltage-sensitive) activator) -0.46(2-Oxoaldehyde dehydrogenase (NAD+) inhibitor) -0.278(CYP3A4 inducer) + 0.389(MAP3K10 inhibitor) -0.328(WARS expression enhancer) -0.443(AMP nucleosidase inhibitor) + 0.113(Trypsin II inhibitor) + 0.242(KLK3 expression inhibitor) -0.141(Phosphodiesterase V inhibitor) -0.501(Isopentenyl-diphosphate DELTA-isomerase inhibitor) -0.0992(Fatty acid elongase inhibitor) -0.0644(Acute neurologic disorders treatment) + 0.139(Hypersexuality) + 0.137(Trimethylamine-N-oxide reductase inhibitor) -0.144(Complement C3a chemotactic receptor antagonist) + 0.397(Neuraminidase inhibitor) -0.411(Carboxypeptidase E inhibitor) + 0.636(Imidazoline I2 receptor antagonist) -0.116(Hyponatremia) -0.266(Cytosol alanyl aminopeptidase inhibitor) + 0.204(Contraceptive female) -0.357(Melatonin 2 agonist) + 0.0666(Antineoplastic (brain cancer)) + 0.0898(Elastase 3A inhibitor) + 0.107(5 Hydroxytryptamine 1A antagonist) + 0.142(N-carbamoyl-L-amino-acid hydrolase inhibitor) -0.242(Prostaglandin-I synthase inhibitor) -0.0856(Analgesic. opioid) -0.2(Cyclooxygenase inhibitor) + 0.284(Alanine dehydrogenase inhibitor) -0.403(5-Alpha-reductase 2 inhibitor) -0.2(Hexokinase inhibitor) + 0.367(Postcoital contraceptive) -0.163(Gonadotropin antagonist) + 0.102(AMPA receptor agonist) + 0.373(Beta lactamase TEM-1 inhibitor) + 0.206(Carcinogenic. group 1) + 0.377(Lysine carboxypeptidase. catalytic subunit inhibitor) + 0.0737(Toxic. respiratory center) -0.0622(Neuronal K-Cl cotransporter inhibitor) -0.167(Potassium channel (ATP-sensitive) activator) -0.223(8-Amino-7-oxononanoate synthase inhibitor) -0.0852(Antihypermotility) + 0.0795(Sodium/glucose cotransporter 2 inhibitor) + 0.101(Sensory disturbance) + 0.368(CDP-diacylglycerol-inositol 3-phosphatidyltransferase inhibitor) -0.0783(Tyrosine-protein kinase receptor antagonist) + 0.202(Glutamate (mGluR5) antagonist) + 0.152(Glucosamine-6-phosphate deaminase inhibitor) -0.276(Protein Wnt-2 inhibitor) + 0.188(Leukotriene antagonist) -0.249(Polycystin-2 inhibitor) + 0.182(Ethanolaminephosphotransferase inhibitor) + 0.107(Ca2+/calmodulin-dependent kinase II beta inhibitor) -0.0785(Peptidyl-prolyl cis-trans isomerase FKBP4 inhibitor) + 0.0301(MW) + 0.106(Carcinogenic. rat. female. urinary bladder) -0.0677(Kainate receptor 2 antagonist) + 0.0619(Vesicle monoamine transporter 2 inhibitor) + 0.0749(Carcinogenic. rat. male. stomach) -0.113(Genotoxic) -0.0594(5 Hydroxytryptamine 4 agonist) -0.0576(Antioxidant) + 0.0703(Phosphodiesterase XI inhibitor) + 0.18(CYP4A11 inhibitor) + 0.0767(Probable DNA dC->dU-editing enzyme APOBEC-3A inhibitor) + 0.0573(Alcohol dehydrogenase substrate) -0.158(Glycine hydroxymethyltransferase inhibitor) -0.154(Alpha 1a adrenoreceptor antagonist) + 0.0497(Phosphodiesterase 4B inhibitor) -0.0434(Histone deacetylase 1B inhibitor) -0.113(Histamine H2 receptor agonist) + 0.0665(Spasmolytic) -0.0343(Antineoplastic enhancer) -0.0594(Sirtuin 1 inhibitor) -0.0545(CC chemokine receptor antagonist) + 0.0476(DNA topoisomerase IV inhibitor) -0.0559(Dyrk kinase inhibitor) -0.16(Kallikrein 13 inhibitor) + 0.0502(Histone deacetylase class IIb inhibitor) -0.219(GMP synthase inhibitor) -0.0426(NADPH oxidase 4 inhibitor) + 0.0309(Troponin C inhibitor) + 0.0467(CDC-like kinase 1 inhibitor) -0.0419(Acetylcholine M1 receptor agonist) + 0.0319(BCR/ABL p210 fusion protein inhibitor) + 0.0857(TXNRD1 expression enhancer) + 0.0289(Cruzipain inhibitor) + 0.0543(IL1B expression enhancer) -0.058(HMOX1 expression enhancer) + 0.195(Nucleotide diphosphatase inhibitor) -0.0622(Mandelate 4-monooxygenase inhibitor) + 0.148(P3 purinoceptor-like protein antagonist) + 0.129(Plasminogen activator stimulant) + 0.0425(Catechol oxidase inhibitor) -0.0327(Panic) + 0.0288(Apraxia) -0.0532(G0S2 expression enhancer) + 0.0551(5 Hydroxytryptamine 1D antagonist) -0.0925(DNA methylase inhibitor) + 0.0527(Peptidyl-glycinamidase inhibitor) -0.0596(Integrin alpha5beta1 antagonist) + 0.0208(TIE antagonist) + 0.024(Fibrinogen receptor antagonist) -0.0154(Methionyl aminopeptidase 2 inhibitor) -0.0371(CCNA2 expression enhancer) -0.0177(EphB4 antagonist) -0.0278(EDN1 expression inhibitor) -0.0522(Thyroid hormone beta 1 antagonist) -0.0777(Adenylosuccinate lyase inhibitor) + 0.0342(Pregnane X receptor agonist) + 0.0209(Lipoprotein lipase inhibitor) + 0.0308(Acetylcholine muscarinic agonist) + 0.0416(Fatty acid binding protein adipocyte inhibitor) -0.00934(Anticonvulsant) -0.0196(PPARG expression enhancer) + 0.00447(Antiviral (HIV)) + 0.00821(Carcinogenic. rat. female. kidney) + 0.00541(Purinergic P2 agonist) -0.0108(Histone acetyltransferase inhibitor) + 0.00564(Excitatory amino acid transporter 1 inhibitor) + 0.0134(Protease activated receptor antagonist) -0.00466(Opioid mu receptor antagonist) + 0.00268(Phosphodiesterase 4C inhibitor) + 0.00206(Cyclin-dependent kinase 7 inhibitor) + 0.000673(General pump inhibitor) + 0.00183(3-Hydroxyanthranilate 3.4-dioxygenase inhibitor) + 0.000465(Protein kinase C nu inhibitor) -0.00108(Aldose reductase inhibitor) -0.000473(TGF beta receptor type I kinase inhibitor) -0.000809(CDK4/cyclin D inhibitor) -0.000267(Melanocortin 5 antagonist) + 5.86

Model 12

-0.23(Serum sickness) + 0.294(Antitussive. narcotic) -0.296(Aggrecanase inhibitor) + 0.145(NumAromAtoms) + 0.135(Acetylcholinesterase inhibitor) + 1.13(Adenylate cyclase stimulant) -1.84(Glutathione synthase inhibitor) -0.122(Neutropenia) -1.63(MAO B inhibitor) + 0.505(Carcinogenic. rat. male. nasal cavity) -0.587(Propanediol dehydratase inhibitor) + 0.0448(Potassium channel small-conductance Ca-activated 3 blocker) + 0.0655(Nuclear receptor corepressor 2 inhibitor) + 0.615(Behavioral disturbance) + 0.136(Peroxisome proliferator-activated receptor alpha agonist) + 1.02(Antineoplastic (insulinoma)) -0.661(Glyceraldehyde-3-phosphate dehydrogenase (NADP+) inhibitor) -0.0944(NumAcceptor) + 0.255(Magnesium-protoporphyrin IX methyltransferase inhibitor) -1.16(Antihematotoxic) + 0.443(CYP1A1* substrate) + 0.46(CNS active muscle relaxant) -0.413(Metalloproteinase-3 inhibitor) + 3.18(Length) -0.478(Phosphodiesterase 8B inhibitor) -0.485(Nephrotoxic) + 1.11(Adenosine A1 receptor agonist enhancer) + 0.773(Cholinergic) + 0.152(Inositol 1.4.5-triphosphate receptor 1 antagonist) -0.0799(Angiotensin II receptor antagonist) + 0.124(Lipophilicity^2) -0.463(Anesthetic inhalation) -0.242(Tumour necrosis factor antagonist) + 0.674(Serine carboxypeptidase inhibitor) + 0.228(Antiviral (Influenza)) -0.357(Glutamate dehydrogenase [NAD(P)+] inhibitor) + 0.316(Antidepressant) + 0.489(Allergic reaction) + 0.599(GABA aminotransferase inhibitor) -0.47(Prostatic (benign) hyperplasia treatment) -0.104(PHLDA1 expression enhancer) -0.716(Dermatitis) + 1.56(UGT2B4 substrate) -0.887(Lacrimal secretion stimulant) -0.157(Keratoses actinic (solar) treatment) + 0.665(Vanilloid 4 antagonist) + 16.7(Volume) -0.611(Cytostatic) -0.455(Amiloride-sensitive sodium channel 1 alpha-subunit blocker) + 0.223(Antidiabetic symptomatic) + 0.255(Phloroglucinol reductase inhibitor) + 0.18(Rho-associated kinase I inhibitor) -0.181(Platelet antagonist) -0.137(ATP citrate lysase inhibitor) + 0.35(Toxic. respiration) + 0.288(Sirtuin inhibitor) + 1.46(Glutamate-cysteine ligase inhibitor) + 11.6(Lipophilicity) -0.428(Orexin receptor 2 antagonist) + 0.435(Irritation) + 0.497(Calcium channel activator) -0.156(Coccolysin inhibitor) -0.162(TEC kinase inhibitor) -0.666(Antidepressant. Imipramin-like) + 0.257(T cell inhibitor) -0.234(Apical sodium codependent bile acid transporter inhibitor) + 0.381(Alpha galactosidase inhibitor) -0.198(Antiviral (Rhinovirus)) -0.293(Glycosuria) + 1.26(Thymidine kinase (Herpes simplex virus 2) inhibitor) -1.46(UGT2B20 substrate) -0.606(5-Alpha-reductase inhibitor) + 0.309(MAP-kinase-activated kinase inhibitor) + 0.66(Hypertrichosis) + 0.133(NumPositive) -0.601(MAP kinase kinase 4 inhibitor) -0.587(Thyroid hormone beta antagonist) -0.217(Rotamase (FKBP12) inhibitor) + 0.428(Glyceraldehyde-3-phosphate dehydrogenase inhibitor) -0.129(Glutamate receptor antagonist) -10.9(Volume^2) + 0.315(Secretory phospholipase A2 inhibitor) + 0.352(CYP2C19 inhibitor) + 0.432(Cytosolic phospholipase A2 beta inhibitor) -0.351(Vitamin D receptor antagonist) + 0.591(Lipoxygenase substrate) -0.951(Glycine C-acetyltransferase inhibitor) -0.279(Lipid peroxidase inhibitor) + 0.294(Prolyl aminopeptidase inhibitor) -0.309(Nonstructural protein 1 (Influenza A) inhibitor) -0.933(Glutathione reductase inhibitor) -0.287(Calcium-dependent phospholipase A2 inhibitor) -0.827(Procollagen glucosyltransferase inhibitor) -0.0436(NumNegative) + 0.549(Anthranilate 3-monooxygenase (deaminating) inhibitor) + 0.495(Paralysis) -0.523(Acylaminoacyl-peptidase inhibitor) -0.577(Cyclin-dependent kinase 1 inhibitor) -0.318(CYP2 substrate) -0.712(Arylamine N-Acetyltransferase substrate) + 0.197(Respiratory analeptic) + 0.198(Galanin receptor antagonist) -0.298(Dopamine D1B antagonist) + 0.269(Toxic. gastrointestinal) -0.208(Cyclooxygenase 3 inhibitor) + 0.203(Carcinogenic. rat. male. mammary gland) -0.267(Antiviral (Hepatitis)) + 0.291(GABA C receptor antagonist) + 0.346(Leucine aminopeptidase inhibitor) -0.35(Carcinogenic. mouse) -0.257(L lactate dehydrogenase C4 inhibitor) + 0.432(Glucosamine-6-phosphate deaminase inhibitor) + 0.128(Troponin I. cardiac muscle inhibitor) + 0.66(MAP kinase signal-integrating kinase 1 inhibitor) + 0.193(Neurotoxic) + 0.205(Integrin alpha4 antagonist) -0.323(Biphenyl-2.3-diol 1.2-dioxygenase inhibitor) -0.49(Acid phosphatase inhibitor) + 0.531(Sickle-cell anemia treatment) -0.509(Cyclic AMP agonist) + 0.477(CAT expression inhibitor) + 2.22(Sialidase 1 inhibitor) + 0.452(Corticosteroid-like) -0.3(Atrial natriuretic peptide antagonist) + 0.124(Hepatic disorders treatment) + 0.103(Antineoplastic (liver cancer)) + 0.21(Bone formation stimulant) -0.661(Estrogen-related receptor alpha antagonist) -0.367(Synaptic vesicle protein SV2. levetiracetam binding site antagonist) -0.163(Insulin secretagoues) -0.219(11-Beta-hydroxysteroid dehydrogenase 1 inhibitor) -1.06(Methylcrotonoyl-CoA carboxylase inhibitor) -0.468(Cystic fibrosis treatment) -0.255(Adenosine uptake inhibitor) + 0.237(Nicotinic alpha4beta2 receptor antagonist) + 0.145(Dual specificity phosphatase 3 inhibitor) -0.271(Transforming growth factor beta antagonist) + 1.07(Fatty acid binding protein adipocyte inhibitor) + 0.897(Anticholelithogenic) + 0.139(Bombesin agonist) -0.471(LAMP3 expression inhibitor) + 0.235(Cruzipain inhibitor) + 0.219(Apoptosis antagonist) -0.189(Acute neurologic disorders treatment) -0.738(Vascular adhesion protein 1 inhibitor) + 0.21(Estrogen-related receptor beta antagonist) + 0.266(Hypothermic) -0.398(Malaise) + 0.237(Protein kinase B inhibitor) + 0.722(D-lactaldehyde dehydrogenase inhibitor) -0.119(Antischistosomal) -0.574(Nicotinic alpha7 receptor agonist) + 1.7(NAD+ diphosphatase inhibitor) -0.13(Platelet aggregation inhibitor) -0.515(Heat shock protein antagonist) + 0.527(Colony stimulating factor agonist) -0.179(Ribosomal protein S6 kinase alpha 4 inhibitor) -0.159(Microtubule stabilization) + 0.135(Matrix metalloproteinase 2 (membrane-type) inhibitor) + 0.386(Alpha 2b adrenoreceptor agonist) + 0.623(NAD(P)H dehydrogenase (quinone) inhibitor) + 0.14(Antibiotic Penicillin-like) + 0.279(NAD(P)+ transhydrogenase (AB-specific) inhibitor) + 0.277(Bulimia treatment) + 0.329(Antinephritic) -0.91(Lysozyme inhibitor) + 0.246(Nicotinic acid receptor agonist) -0.181(Antibiotic Penem-like) + 0.42(Galactose oxidase inhibitor) + 1.08(Cell wall synthesis inhibitor) + 1.01(MAP3K11 inhibitor) -0.585(ATPase (Vacuolar H+) inhibitor) -0.622(Laxative) -0.711(CDC25C inhibitor) + 0.24(Anemia) + 0.221(Src kinase inhibitor) -0.87(Low molecular weight phosphotyrosine protein phosphatase inhibitor) + 0.293(Cytochrome P450 stimulant) + 0.314(Dyslipidemia) -0.136(Glutamate (mGluR group I) agonist) + 0.362(AMP-activated protein kinase. alpha-2 subunit inhibitor) -0.67(Glutamate (mGluR6) antagonist) + 0.157(Alpha-L-fucosidase 1 inhibitor) + 0.495(Antihypotensive) -0.164(Polo-like kinase inhibitor) -0.203(Thymidine kinase 2 inhibitor) -0.478(Chymase inhibitor) -0.767(GMP synthase inhibitor) -0.748(Melatonin 2 agonist) + 0.0991(Death-associated protein kinase inhibitor) + 0.218(Carcinogenic. rat. female. mammary gland) -0.258(GPX2 expression enhancer) -0.214(CYP1A2 substrate) + 0.156(Histone deacetylase class II inhibitor) + 0.471(Nicotinic receptor beta3 subunit antagonist) + 0.668(CYP19 substrate) -0.431(Hematopoietic inhibitor) -0.595(Protein Wnt-2 inhibitor) + 0.135(Candidapepsin 2 inhibitor) -0.673(Cyclomaltodextrin glucanotransferase inhibitor) -0.217(Potassium channel (ATP-sensitive) activator) -0.149(Polo-like kinase-2 inhibitor) -0.152(Matrix metalloproteinase 1 (membrane-type) inhibitor) + 0.396(Inosine monophosphate dehydrogenase inhibitor) -0.171(Steroid DELTA-isomerase inhibitor) + 0.133(MAP kinase kinase kinase inhibitor) -0.253(Beta-adrenergic receptor kinase inhibitor) + 0.125(HCV NS5A inhibitor) -0.171(Angiotensin-converting enzyme 2 inhibitor) + 0.232(Huntington's disease treatment) + 0.1(Yersiniabactin siderophore biosynthetic protein inhibitor) + 0.333(Diaminopropionate ammonia-lyase inhibitor) -0.162(Pim-1 kinase inhibitor) + 0.387(Trimethylamine-N-oxide reductase inhibitor) -0.532(mRNA (nucleoside-2'-O-)-methyltransferase inhibitor) + 0.112(Farnesoid X receptor agonist) -0.628(Histone deacetylase class IV inhibitor) -0.163(Ribosomal protein S6 kinase alpha 3 inhibitor) -0.254(Retinoid X receptor agonist) -0.258(IFITM1 expression enhancer) + 0.117(ADAM9 inhibitor) + 0.275(Oleamide hydrolase inhibitor) + 0.327(SPP1 expression enhancer) -0.166(Alcohol dehydrogenase (NADP+) inhibitor) -0.329(Palmitoyl-CoA hydrolase inhibitor) -0.504(UDP-glucuronate decarboxylase inhibitor) -0.477(Lysophosphatidic acid receptor antagonist) -0.164(Phospholipase A2 X inhibitor) + 0.218(Nucleoside-diphosphatase inhibitor) -0.168(Non-steroidal antiinflammatory agent) + 0.453(Deoxyhypusine monooxygenase inhibitor) -0.208(TGF beta receptor type I kinase inhibitor) -0.112(M17 leucyl aminopeptidase inhibitor) + 0.115(Dysarthria) + 0.0229(NumHal) + 0.0897(Tryptophan hydroxylase 1 inhibitor) + 0.13(Ribosomal protein S6 kinase inhibitor) + 0.0694(Urologic disorders treatment) + 0.211(Insecticide) -0.284(8-Amino-7-oxononanoate synthase inhibitor) + 0.119(Antifungal) + 0.187(Intermittent claudication treatment) + 0.263(Dihydrofolate reductase inhibitor) -0.119(Fibroblast growth factor 1 antagonist) -0.0933(Cognition disorders treatment) + 0.05(Dry eye) -0.345(NRIP1 expression enhancer) -0.163(Gastrin inhibitor) + 0.319(Prolactin inhibitor) + 0.0995(Sodium/calcium exchanger 1 inhibitor) + 0.433(LGALS8 expression enhancer) + 0.102(Fatty acid synthase inhibitor) + 0.315(Formate dehydrogenase inhibitor) + 0.187(Ulceration) -0.0783(RNA-directed RNA polymerase (Influenza A) inhibitor) + 0.0878(Phosphodiesterase 6G inhibitor) -0.107(Kainate receptor 2 antagonist) + 0.0914(Protein kinase C delta inhibitor) + 0.0978(ErbB-1 antagonist) + 0.306(Stromelysin 2 inhibitor) + 0.231(Phospholipase C inhibitor) + 0.138(Vasoprotector) -0.109(Tyrosine-protein kinase TXK inhibitor) -0.13(Carcinogenic. mouse. male. liver) + 0.0869(Elastase 3B inhibitor) -0.215(P-glycoprotein 1 inhibitor) + 0.135(CDKN1A expression enhancer) + 0.12(Protein kinase (CK1) gamma 2 inhibitor) -0.234(Cell wall biosynthesis inhibitor) -0.226(Cathepsin S inhibitor) + 0.145(Mediator release inhibitor) -0.272(L-Serine ammonia-lyase inhibitor) + 0.0555(Autoimmune disorders treatment) + 0.105(Periodontitis treatment) -0.364(Lysine carboxypeptidase inhibitor) -0.127(Leukopenia) -0.1(Lysophosphatidic acid 2 receptor antagonist) + 0.181(Dimethylallyltranstransferase inhibitor) -0.158(Antispirochetal) -0.275(Tripeptidyl-peptidase I inhibitor) + 0.261(ICAM 1 antagonist) -0.1(Proto-oncogene tyrosine-protein kinase CSK inhibitor) -0.16(Gonadotropin antagonist) -0.12(Carcinogenic. mouse. female. stomach) + 0.0787(DNA topoisomerase IV inhibitor) -0.1(Peroxidase inhibitor) -0.159(GDF15 expression enhancer) + 0.182(CYP2G1 substrate) + 0.0669(Sentrin-specific protease 8 inhibitor) + 0.279(Astacin inhibitor) -0.234(CC chemokine 8 receptor antagonist) -0.0904(Carcinogenic. rat. male) + 0.126(NADPH oxidase inhibitor) -0.0788(Parkinsonism) -0.0506(Sodium/hydrogen exchanger 1 inhibitor) + 0.144(Dopamine beta hydroxylase inhibitor) -0.163(ID1 expression enhancer) -0.0535(Secretase beta 2 inhibitor) -0.171(Acetylcholine nicotinic agonist) -0.144(Cholesterol synthesis inhibitor) + 0.0462(Cathepsin F inhibitor) -0.0549(24-sterol C-methyltransferase inhibitor) -0.0976(UDP-glucuronosyltransferase substrate) + 0.131(Thromboxane A2 antagonist) + 0.167(Phosphoenolpyruvate carboxylase inhibitor) -0.0305(Cell adhesion molecule inhibitor) + 0.0454(Adrenaline antagonist) -0.054(Phosphodiesterase 5A inhibitor) -0.0291(Antiarrhythmic) + 0.0285(Bromodomain-containing protein 2 inhibitor) + 0.0375(Antibiotic Tribactam-like) -0.0419(Sodium/hydrogen exchanger 2 inhibitor) -0.178(Dihydrofolate synthase inhibitor) -0.065(HIF1A expression enhancer) + 0.115(Sodium/hydrogen exchanger 3 inhibitor) -0.146(Fatty acid transport protein 4 inhibitor) -0.233(Glucose-1-phosphate adenylyltransferase inhibitor) + 0.157(Asparagine-oxo-acid transaminase inhibitor) + 0.0366(Carbonic anhydrase XII inhibitor) -0.0604(Sialorrhea) -0.141(NAD(P)H dehydrogenase (quinone) 1 inhibitor) -0.0922(Heat shock protein agonist) -0.035(Cholecystokinin A antagonist) + 0.03(Phospho-N-acetylmuramoyl-pentapeptide-transferase inhibitor) -0.0539(CA2 expression enhancer) + 0.0983(Peroxisome proliferator-activated receptor gamma antagonist) -0.0498(4-Methoxybenzoate monooxygenase (O-demethylating) inhibitor) -0.0478(Nicotinamidase inhibitor) -0.0312(cAMP-dependent protein kinase type II-beta regulatory subunit inhibitor) + 0.0372(Ototoxicity) -0.0273(Mineralocorticoid antagonist) + 0.0305(NADH oxidase inhibitor) -0.0263(Paraplegia) + 0.0233(Fusion protein inhibitor) + 0.86(Length^3) -0.0837(Pemphigus) -0.0404(Antiuremic) -0.098(2-Oxoaldehyde dehydrogenase (NAD+) inhibitor) + 0.0332(Troponin T. cardiac muscle inhibitor) + 0.0238(Factor VII inhibitor) -0.0471(ICAM1 expression inhibitor) -0.126(Beta-1.4-mannosyl-glycoprotein 4-beta-N-acetylglucosaminyltransferase inhibitor) + 0.0555(Inositol oxygenase inhibitor) + 0.00486(NumDonor) + 0.0598(Apolipoprotein A inhibitor) + 0.0435(5 Hydroxytryptamine 3 agonist) -0.0166(Selectin antagonist) + 0.0142(Runt-related transcription factor 1 inhibitor) -0.0187(Carcinogenic. group 3) + 0.0113(ALK inhibitor) -0.0232(Acylphosphatase inhibitor) + 0.0421(Glycerol-3-phosphate dehydrogenase (NAD+) inhibitor) -0.0115(Presenilin 1 inhibitor) + 0.0116(Vasodilator. peripheral) -0.0324(Calpain small subunit 1 inhibitor) + 0.0421(2-Isopropylmalate synthase inhibitor) -0.0118(CYP2C8 inhibitor) -0.0308(Neurotensin 3 receptor antagonist) -0.0165(Analgesic stimulant) -0.0229(CYP1B1 inhibitor) -0.0203(Procollagen C-endopeptidase inhibitor) -0.0112(Perilipin-5 inhibitor) + 0.00858(Histone deacetylase class IIb inhibitor) + 0.00659(Insulysin inhibitor) + 0.0183(Cellulose 1.4-beta-cellobiosidase inhibitor) + 0.00778(CYR61 expression enhancer) -0.00992(Hot flush treatment) + 0.00193(Dopamine D3 antagonist) -0.00238(Ubiquitin-protein ligase inhibitor) + 5.66

Model 13

-0.139(Dopamine D1A antagonist) -0.777(Cytosol alanyl aminopeptidase inhibitor) -0.092(HIV-1 integrase inhibitor) -1.75(Length) + 1.3(HSPA1B expression enhancer) + 27.7(Lipophilicity) + 0.339(Miotic) -0.808(ATF3 expression enhancer) + 0.173(NumAromAtoms) + 0.143(Lipophilicity^2) -0.278(HCV NS5B polymerase inhibitor) -1.05(DNA synthesis inhibitor) -0.0409(Antitussive. narcotic) + 0.698(Bronchoconstrictor) -0.586(Nephrotoxic) -0.284(Integrin beta6 antagonist) -1.1(Potassium channel (Ca-activated) activator) -0.575(Collagenase 3 inhibitor) + 0.248(Ribosomal protein S6 kinase 1. 70-kDa inhibitor) -0.354(P-glycoprotein 1 inhibitor) + 0.549(Gastrointestinal disturbance) -0.207(Purinergic P2X antagonist) + 0.323(Neutrophil collagenase inhibitor) -0.389(Epstein-Barr nuclear antigen 1 inhibitor) -0.339(Antiulcerative) -0.59(Leukotriene B4 receptor 2 antagonist) + 0.893(Peroxisome proliferator-activated receptor alpha antagonist) + 0.545(Carcinogenic. rat. male. stomach) + 0.301(Integrin alphaLbeta2 antagonist) -0.706(Glutathione S-transferase substrate) -1.06(Tyrosine-protein kinase ABL2 inhibitor) + 0.667(Vanilloid 4 antagonist) + 0.569(Ceramide glucosyltransferase inhibitor) + 0.373(Rho-associated kinase inhibitor) + 0.213(Antifungal) + 1.08(Calcium antagonist) -1(Cholesterol antagonist) -0.126(Orexin receptor 1 antagonist) + 0.526(Postmenopausal disorders treatment) + 0.748(Adenosine A2 receptor agonist) -0.15(Leucyltransferase inhibitor) + 0.785(Sickle-cell anemia treatment) + 0.29(Hepatic disorders treatment) + 0.155(Potassium channel small-conductance Ca-activated 3 blocker) + 0.868(Arachidonic acid antagonist) -0.959(UDP-3-O-acyl-N-acetylglucosamine deacetylase inhibitor) + 0.757(Inosine monophosphate dehydrogenase inhibitor) -0.364(Antiviral (Poxvirus)) + 0.201(Transglutaminase 2 inhibitor) -0.542(Amylo-alpha-1.6-glucosidase inhibitor) -0.243(Cyclin H inhibitor) -0.257(Formaldehyde dehydrogenase (glutathione) inhibitor) + 1.87(Carbonic anhydrase XIV inhibitor) -0.27(Melatonin 1 antagonist) -0.553(Hyperthermic) -0.534(Cyclooxygenase inhibitor) -0.257(Protein phosphatase 2A inhibitor) + 0.17(Angiogenesis inhibitor) + 0.463(Protocollagen prolyl hydroxylase inhibitor) -0.0863(Tyrosine-protein kinase EMT inhibitor) -0.407(Pruritus) + 1.5(Calmodulin-domain protein kinase 1 inhibitor) + 0.847(Adenosine deaminase inhibitor) -0.684(Cyclic AMP modulator) + 0.528(Ototoxicity) + 0.419(Pain) + 1.05(Phosphate acetyltransferase inhibitor) -1.42(Protein phosphatase 2B inhibitor) -0.724(Vitamin) + 0.825(Proline transporter inhibitor) + 0.339(cAMP-dependent protein kinase alpha catalytic subunit inhibitor) + 17(Length^3) -0.752(Phosphodiesterase 1B inhibitor) + 0.494(CCL5 expression enhancer) -0.553(Factor Xa inhibitor) + 0.255(Antinociceptive) + 0.14(Autoimmune disorders treatment) + 0.334(CYP1A1* substrate) -0.346(Carcinogenic. mouse. female. stomach) -0.6(Peroxisome proliferator-activated receptor delta antagonist) + 0.962(Ethanolaminephosphotransferase inhibitor) + 0.502(Tremor) -0.596(Ribosomal protein S6 kinase alpha 1 inhibitor) -0.0483(NumAcceptor) -0.989(Melatonin 2 agonist) + 0.485(Hypolipemic) -0.211(Restenosis treatment) + 0.423(Ribosomal protein S6 kinase. 70-kDa inhibitor) + 0.847(Cytosine deaminase inhibitor) -0.753(Acetylspermidine deacetylase inhibitor) + 12.8(Volume) -0.227(Purinergic P2T antagonist) -0.186(Selectin antagonist) -0.712(EGR3 expression enhancer) -0.513(Acid phosphatase inhibitor) -0.976(Nicotinate phosphoribosyltransferase inhibitor) -0.0323(Opioid mu receptor agonist) + 0.97(CYP24 inhibitor) -0.403(CYP3A4 inducer) -0.27(Parkinsonism) -0.673(Histidine decarboxylase inhibitor) + 0.126(3.4-Dihydroxyphenylacetate 2.3-dioxygenase inhibitor) -0.113(Neuronal K-Cl cotransporter inhibitor) + 0.407(ABCB1 expression enhancer) + 0.191(Endocannabinoid uptake inhibitor) + 0.255(Carcinogenic. rat. male. kidney) -0.661(Antineoplastic antimetabolite) -0.941(Alpha-N-acetylgalactosaminide alpha-2.6-sialyltransferase inhibitor) -0.539(Argininosuccinate lyase inhibitor) + 0.449(Carcinogenic. breast) -0.202(Steroid DELTA-isomerase inhibitor) + 0.459(2-(acetamidomethylene)succinate hydrolase inhibitor) -0.146(Microtubule formation inhibitor) -0.567(HSD17B1 expression enhancer) + 0.375(GABA C receptor antagonist) -0.403(Aspartate 4-decarboxylase inhibitor) + 0.218(Mood disorders treatment) + 0.685(Stromelysin 2 inhibitor) + 0.186(Cruzipain inhibitor) -0.0246(NumNegative) + 0.227(HCV NS5A inhibitor) + 0.563(Targeting protein for Xklp2 inhibitor) + 0.455(GADD45A expression enhancer) + 0.0118(Creatine kinase inhibitor) -0.243(Carcinogenic. mouse. male) -0.461(CDK/Cyclin complex inhibitor) + 0.622(S-adenosyl-L-homocysteine hydrolase inhibitor) + 0.195(Nicotinic acid receptor 2 agonist) + 0.405(CYP2G1 substrate) + 0.843(Adenosine A2b receptor antagonist) + 0.561(UDP-glucose 4-epimerase inhibitor) + 0.319(BIRC3 expression enhancer) -1.29(Carbonic anhydrase VI inhibitor) -0.519(Quinone reductase 2 inhibitor) + 0.0678(NumPositive) + 1.2(MAP3K11 inhibitor) + 0.218(Cytosolic phospholipase A2 delta inhibitor) + 0.349(Sentrin-specific protease 6 inhibitor) -0.662(NOS2 expression inhibitor) + 0.378(UGT1A9 substrate) -0.22(NADPH oxidase 4 inhibitor) + 0.15(Gynecological disorders treatment) -0.213(Microtubule stabilization) -0.359(Acetylcholine M4 receptor antagonist) -10.8(Volume^2) -0.208(Analgesic. opioid) + 0.266(Adenosylmethionine cyclotransferase inhibitor) -0.656(GABA transporter inhibitor) -0.454(Fibromyalgia syndrome treatment) + 0.499(Protein-tyrosine phosphatase LC-PTP inhibitor) + 0.302(UDP-N-acetylmuramate-L-alanine ligase inhibitor) -0.22(Phosphorylase kinase gamma subunit 2 inhibitor) + 0.28(Lysase inhibitor) + 0.216(Ca2+/calmodulin-dependent kinase II gamma inhibitor) -0.158(Acute neurologic disorders treatment) -0.696(UDP-N-acetylglucosamine 1-carboxyvinyltransferase inhibitor) -0.249(Cyclin B1 inhibitor) + 0.586(D-Lysine 5.6-aminomutase inhibitor) + 0.45(Inositol oxygenase inhibitor) -0.13(Colic) -0.154(Raynaud's phenomenon treatment) + 0.285(Ulceration) -0.639(SFN expression enhancer) -0.291(Aldehyde dehydrogenase inhibitor) + 0.682(Glutamate decarboxylase inhibitor) -0.299(Transforming growth factor antagonist) -0.293(Hypertensive) + 0.203(Sweating) + 0.122(Urologic disorders treatment) -1.02(NF-kappa-B essential modulator inhibitor) -0.268(Panic) + 0.172(MAP-kinase-activated kinase inhibitor) -0.248(Matrix metalloproteinase 1 (membrane-type) inhibitor) + 0.206(Tripeptidyl peptidase II inhibitor) -0.237(MAP kinase 11 inhibitor) + 0.274(CYP2C19 inhibitor) -0.134(Phosphatidylinositol 3-kinase delta inhibitor) + 0.208(Integrin alphaVbeta6 antagonist) -0.58(Hot flush treatment) + 0.209(Cholestenone 5alpha-reductase inhibitor) -0.131(Antiprotozoal (Trypanosoma)) + 0.122(5 Hydroxytryptamine 5B antagonist) + 0.651(I kappa B kinase inhibitor) + 0.795(Fatty acid binding protein adipocyte inhibitor) -0.339(Mannose-6-phosphate isomerase inhibitor) -0.804(Saccharopine dehydrogenase (NADP+. L-lysine-forming) inhibitor) -0.204(Endothelin receptor antagonist) -0.0927(Antiallergic) + 0.6(Follicle-stimulating hormone antagonist) + 0.208(Anesthetic general) -0.879(Citrate (Si)-synthase inhibitor) + 0.187(Endometrios treatment) -0.623(UGT1A3 substrate) -0.394(Menstruation disorders treatment) + 0.275(Beta glucosidase inhibitor) -0.417(ATM kinase inhibitor) + 0.118(C10ORF10 expression enhancer) + 0.525(HMGCR expression inhibitor) -0.215(5 Hydroxytryptamine 4 agonist) + 0.113(Antibiotic beta Lactam-like) -0.207(Integrin beta3 antagonist) -0.563(3(or 17)beta-hydroxysteroid dehydrogenase inhibitor) + 0.543(Tyrosine phenol-lyase inhibitor) + 0.35(Ulcer. peptic) -0.332(Chymase inhibitor) + 0.154(Gastrointestinal disorders treatment) -0.135(Sodium/hydrogen exchanger 1 inhibitor) + 0.106(Antineoplastic (endocrine cancer)) -0.223(Transcription factor E2F1 inhibitor) -0.347(Photosensitizer) -0.363(Serine-glyoxylate transaminase inhibitor) -0.425(CC chemokine 8 receptor antagonist) + 0.0973(Troponin I. cardiac muscle inhibitor) -0.254(Janus tyrosine kinase 2 inhibitor) + 0.221(TNF expression enhancer) + 0.402(Alanine transaminase inhibitor) -0.1(D-Amino-acid oxidase inhibitor) + 0.232(Leukopoiesis inhibitor) -0.178(Protein kinase C eta inhibitor) -0.286(Glaucoma) + 0.152(Alpha adrenoreceptor antagonist) -0.112(Cholecystokinin A antagonist) -0.642(Orotate phosphoribosyltransferase inhibitor) + 0.345(Morphine 6-dehydrogenase inhibitor) -0.211(Splenomegaly) -0.148(Protein kinase (CK2) alpha inhibitor) + 0.115(Radical formation agonist) + 0.107(Cathepsin B inhibitor) -0.347(Prostaglandin EP3 antagonist) + 0.178(CYP2C18 substrate) -0.184(Glycosylceramidase inhibitor) + 0.438(Peptide deformylase inhibitor) -0.0853(Phosphodiesterase 4A inhibitor) -0.098(Fatty acid elongase inhibitor) -0.418(Syk tyrosine kinase inhibitor) + 0.167(Phosphodiesterase XI inhibitor) -0.165(EphB4 antagonist) -0.282(Pregnane X receptor agonist) + 0.364(MAP kinase kinase inhibitor) -0.301(Contraceptive) -0.206(CYP4A11 substrate) -0.22(EDN1 expression enhancer) -0.147(Cytochrome P450 inhibitor) + 0.23(Antipruritic. allergic) + 0.139(VLA-4 antagonist) + 0.117(Bradycardic) -0.106(Neutral endopeptidase inhibitor) + 0.323(Oxytocic) + 0.106(Hyperglycemic) -0.0861(Hypogonadism treatment) -0.115(Sigma 1 receptor antagonist) -0.194(Sphingosine 1-phosphate receptor 2 antagonist) + 0.207(Diabetic neuropathy treatment) -0.0654(Interleukin 8 antagonist) -0.0901(Antiviral (Rhinovirus)) + 0.0871(CDC-like kinase 1 inhibitor) -0.13(Gelatinase inhibitor) + 0.508(CYP4F3 substrate) + 0.166(Urticaria) + 0.075(Gout treatment) + 0.249(Nitric-oxide synthase stimulant) + 0.283(Formyl peptide receptor 1 antagonist) -0.165(SUMO-activating enzyme subunit 1 inhibitor) -0.325(Sulfate adenylyltransferase inhibitor) -0.422(DNA methyltransferase 3B inhibitor) + 0.3(Anticholelithogenic) -0.257(CF transmembrane conductance regulator antagonist) + 0.221(Nerve growth factor antagonist) -0.0616(Nucleoside transporters inhibitor) + 0.0652(FABP1 expression enhancer) -0.413(Cyanate hydratase inhibitor) -0.27(Thyroid hormone antagonist) + 0.0814(Carbonic anhydrase III inhibitor) -0.0967(Glycogen synthase kinase-3 alpha inhibitor) -0.166(Propanediol dehydratase inhibitor) + 0.0133(NumHal) + 0.104(Pectate lyase inhibitor) + 0.293(Tetracycline antiport transporter antagonist) -0.252(FAS expression inhibitor) -2.71(Volume^3) + 0.104(DNA polymerase beta inhibitor) + 0.093(Lichenoid eruption) -0.235(Oxytocin agonist) -0.0796(Phosphatidylinositol 3-kinase alpha inhibitor) + 0.0882(Carcinogenic. rat. male. skin) + 0.292(FAD diphosphatase inhibitor) -0.0647(Epithelial sodium channel blocker) -0.0608(EIF5A expression inhibitor) + 0.185(Glyceraldehyde-3-phosphate dehydrogenase (phosphorylating) inhibitor) + 0.0556(MAP kinase kinase 7 inhibitor) -0.217(Lysophosphatidic acid 1 receptor antagonist) + 0.075(Prostaglandin E1 agonist) -0.0604(Jaundice) -0.0575(17-Beta-hydroxysteroid dehydrogenase 1 inhibitor) -0.0899(Glutamate receptor antagonist) + 0.232(Progesterone receptor B1 antagonist) -0.205(Protocatechuate 4.5-dioxygenase inhibitor) + 0.123(Oleamide hydrolase inhibitor) + 0.206(GABA B receptor antagonist) + 0.153(Glucosyl transferase inhibitor) -0.0409(ATPase (Mitochondrial F1F0) inhibitor) + 0.0748(Glycogen synthase kinase-3 inhibitor) -0.0373(HIV-1 reverse transcriptase inhibitor) + 0.0595(Hypersexuality) + 0.0488(Endothelin converting enzyme 1 inhibitor) + 0.0391(MAP kinase 1 inhibitor) -0.0627(Carcinogenic. rat. female. mammary gland) -0.137(Phosphodiesterase 1A inhibitor) + 0.106(H+/K+-transporting ATPase inhibitor) + 0.107(TH expression enhancer) + 0.123(Motilin receptor antagonist) + 0.146(Oxaloacetate decarboxylase inhibitor) -0.132(CYP3A inducer) -0.0872(DHRS3 expression enhancer) + 0.0546(Tachycardiac) + 0.0365(Matrix metalloproteinase 2 (membrane-type) inhibitor) + 0.043(Sirtuin inhibitor) + 0.135(Carbonic anhydrase VA inhibitor) + 0.0866(H2AFX expression enhancer) -0.0282(Apical sodium codependent bile acid transporter inhibitor) -0.0296(Calcium channel T-type blocker) + 0.0239(Elastase 2A inhibitor) + 0.0842(CYP11B1 inhibitor) + 0.0255(Interleukin 4 antagonist) -0.0425(Neuropeptide Y antagonist) + 0.0979(UGT2B7H substrate) -0.0942(Aspartate carbamoyltransferase inhibitor) -0.0243(Acetylcholine M1 receptor agonist) -0.0729(Nuclear receptor subfamily 4. group A. member 2 agonist) + 0.0727(Reverse transcriptase (Hepatitis B) inhibitor) -0.027(CLU expression enhancer) -0.0827(Beta-N-acetylhexosaminidase inhibitor) + 0.063(Caspase 8 inhibitor) + 0.0139(dTMP kinase inhibitor) + 0.0456(5 Hydroxytryptamine 1D antagonist) + 0.00699(MW) -0.0356(Cyclin B2 inhibitor) -0.0121(Complement inhibitor) -0.0157(Lysophosphatidic acid 3 receptor antagonist) + 0.0288(Headache) -0.0152(Cyclin-dependent kinase 9 inhibitor) + 0.0164(Antiparasitic) + 0.0131(Alcohol dehydrogenase substrate) -0.0433(X-His dipeptidase inhibitor) -0.0135(COL1A1 expression enhancer) + 0.0392(CDC-like kinase 4 inhibitor) + 0.0368(Somatostatin 2 antagonist) + 0.0529(UGT2B7Y substrate) + 0.0103(CXC chemokine 3 receptor antagonist) -0.0162(MT1G expression enhancer) -0.0329(Acetylcholine M5 receptor antagonist) + 0.00529(Antineoplastic (breast cancer)) -0.0328(Cellulose synthase (UDP-forming) inhibitor) + 0.00815(Melanocortin 4 antagonist) + 0.0105(Extrapyramidal disorders treatment) + 0.0033(Aldehyde dehydrogenase substrate) -0.00709(Histamine H2 receptor agonist) + 0.0113(Thioredoxin reductase 3 inhibitor) + 0.0049(Beta-D-fucosidase inhibitor) + 0.00261(Expectorant) -0.00512(NAD(P)H dehydrogenase (quinone) 1 inhibitor) + 5.44

Model 14

+ 0.735(CYP2D substrate) -1.52(N4-(beta-N-acetylglucosaminyl)-L-asparaginase inhibitor) -0.318(Thrombocytopenia) -0.752(Mydriatic) + 0.152(NumAromAtoms) -0.0981(Aggrecanase inhibitor) -0.122(Protein kinase (CaMK. MLCK. PhK. SNF. KIN. NIM1. MAPKAP. POLO. CHK. ULK. RSK-2nd domain) inhibitor) + 0.111(Immunoglobulin Fc receptor antagonist) -0.581(CYP1A2 substrate) + 1.02(Potassium channel Kv1.1 blocker) + 0.4(Hypothermic) -0.192(Bradykinin antagonist) + 0.947(IL4 expression enhancer) + 0.153(GDPD3 expression enhancer) -0.0517(Dihydroneopterin aldolase inhibitor) -0.0785(Nicotinic receptor alpha10 subunit antagonist) + 0.644(Antibiotic Cephalosporin-like) + 1.23(Methionyl aminopeptidase inhibitor) + 0.25(Length) -0.489(5 Hydroxytryptamine 7 antagonist) -0.21(Protein-tyrosine phosphatase 1B inhibitor) + 0.108(Lipophilicity^2) + 0.193(Bombesin 1 receptor antagonist) -0.615(CYP2C substrate) -0.184(Cholestasis) -0.568(SQLE expression inhibitor) -0.0876(NumAcceptor) + 0.173(NumPositive) -0.0857(Transcription factor inhibitor) + 0.356(Caspase 7 inhibitor) -1.71(CDK4/cyclin D inhibitor) + 0.204(Phospholipase A1 inhibitor) + 0.467(FOS expression enhancer) + 2.41(Carbonic anhydrase XIV inhibitor) -0.377(Peptidyl-prolyl cis-trans isomerase FKBP4 inhibitor) -0.83(Thromboxane synthase inhibitor) -0.362(Amiloride-sensitive sodium channel 1 alpha-subunit blocker) -0.0443(Tyrosine-protein kinase receptor antagonist) -0.736(Carcinogenic) + 16.7(Lipophilicity) + 0.819(Hypertrichosis) + 0.359(Carcinogenic. rat. female. lung) -0.68(Bacterial leucyl aminopeptidase inhibitor) -1.18(Potassium channel (Ca-activated) activator) -0.771(Heat shock protein antagonist) + 0.279(Immunosuppressant) + 1.49((R)-aminopropanol dehydrogenase inhibitor) + 1.04(NAD(P)+ transhydrogenase (AB-specific) inhibitor) + 0.335(Myocarditis) -1.05(Anesthetic inhalation) -1.13(Antineoplastic antimetabolite) -0.296(5 Hydroxytryptamine 4E antagonist) -0.7(Cell wall biosynthesis inhibitor) + 0.442(Apnea) -1.12(Hair growth stimulant) -0.46(Pyruvate dehydrogenase kinase 1 inhibitor) + 0.292(Excitability) -0.232(Nicastrin inhibitor) + 1.33(Adenylate cyclase V inhibitor) + 0.862(CYP2D6 inhibitor) -0.241(Hypercholesterolemic) -0.298(Ophthalmoplegia) + 0.753(TP53I3 expression enhancer) -0.284(Purinergic P2T antagonist) + 0.63(Ribosomal protein S6 kinase 1. 70-kDa inhibitor) -0.692(Cytostatic) + 1.66(Cathepsin D inhibitor) -0.251(CYP3A4 inhibitor) -0.224(Analgesic) -0.504(Glutathione S-transferase substrate) + 0.529(Neurokinin 3 antagonist) -0.308(Vascular endothelial growth factor 3 antagonist) + 0.589(Anemia) -0.801(Cathepsin S inhibitor) -0.243(Antispirochetal) + 0.783(Ether-a-go-go potassium channel blocker) + 0.53(Carcinogenic. rat. female. urinary bladder) -0.383(Histone deacetylase 2 inhibitor) + 8.85(Volume) + 0.0594(Proteasome subunit beta type-5 inhibitor) + 0.473(GABA receptor agonist) + 0.187(Protein kinase inhibitor) + 0.421(Cytosolic phospholipase A2 inhibitor) + 0.677(Phosphatidylinositol 4-kinase inhibitor) + 0.472(Estrogen alpha receptor agonist) -0.322(Angiotensin AT1 receptor antagonist) + 0.555(Inosine monophosphate dehydrogenase inhibitor) -0.869(Histidine decarboxylase inhibitor) -1.23(Ethanolamine kinase inhibitor) -0.578(AKR1C1 expression enhancer) -0.825(Glutathione synthase inhibitor) + 1.13(Phospholipase A2 inhibitor) -0.38(Histone deacetylase 4 inhibitor) -0.302(Prostaglandin F2 alpha antagonist) + 0.218(Imidazoleacetate 4-monooxygenase inhibitor) + 0.317(HMGCS1 expression enhancer) -0.185(BAD expression inhibitor) + 0.382(Glutamate-cysteine ligase inhibitor) + 0.657(Protein kinase stimulant) + 0.179(Integrin alpha4beta1 antagonist) -0.479(CYP3A4 inducer) -0.272(Calcium channel T-type blocker) + 0.139(Death-associated protein kinase 3 inhibitor) -0.334(Prostatic (benign) hyperplasia treatment) -0.196(Antineoplastic (lymphocytic leukemia)) -1.69(Lysophosphatidic acid receptor antagonist) -0.166(Histidine-rich protein PFHRP-II inhibitor) + 0.307(Toxic. gastrointestinal) + 0.453(Calcium channel activator) -14.7(Volume^2) + 0.178(Antineoplastic (breast cancer)) -0.617(CDK2 expression inhibitor) -0.178(cAMP-dependent protein kinase type II-beta regulatory subunit inhibitor) + 0.398(Glyceraldehyde-3-phosphate dehydrogenase inhibitor) + 0.19(Nitrile hydratase inhibitor) -0.211(Polo-like kinase-2 inhibitor) + 0.147(Dual specificity phosphatase 1 inhibitor) + 0.214(Phosphodiesterase 6C inhibitor) -0.361(Dopamine D1B antagonist) -0.284(Neutral endopeptidase inhibitor) -0.42(Non-steroidal antiinflammatory agent) + 0.251(Substance P antagonist) + 0.685(DNA ligase (ATP) inhibitor) + 0.255(Factor XII inhibitor) -0.553(Aurora-B kinase inhibitor) + 1.38(Procollagen-proline 3-dioxygenase inhibitor) + 0.597(Raynaud's phenomenon) -0.187(Antibiotic beta Lactam-like) + 0.93(Postcoital contraceptive) + 0.617(Caspase 3 inhibitor) -1.03(Homoserine dehydrogenase inhibitor) -0.24(Adenylate cyclase II inhibitor) + 0.209(Inositol 1.4.5-triphosphate receptor 1 antagonist) + 0.257(UDP-N-acetylmuramate-L-alanine ligase inhibitor) -0.163(Catalase stimulant) + 0.188(5 Hydroxytryptamine 5 antagonist) -0.254(MAP kinase 7 inhibitor) + 0.165(CYP1A2 inducer) -0.189(Antineoplastic (small cell lung cancer)) + 0.129(Antineoplastic (bone cancer)) + 0.417(MAP kinase kinase inhibitor) + 0.128(Antineoplastic (non-small cell lung cancer)) -0.359(Calcium-dependent phospholipase A2 inhibitor) + 0.48(Glycosoaminoglycans antagonist) -1.49(Chalcone isomerase inhibitor) + 0.891(1-Pyrroline-5-carboxylate dehydrogenase inhibitor) -0.346(Choreoathetosis) -0.763(Sorbitol dehydrogenase inhibitor) -0.197(Ribosomal protein S6 kinase. 90-kDa inhibitor) -0.455(TGFB1 expression enhancer) -1.03(Adenylosuccinate lyase inhibitor) -0.185(CYP51 inhibitor) + 0.176(Systemic lupus erythematosus treatment) -0.378(VCAM-1 antagonist) + 1.12(Aralkylamine N-acetyltransferase inhibitor) -0.192(Retinoic acid alpha receptor agonist) -0.205(Methemoglobinemia) -0.329(Tryptophan 5 hydroxylase inhibitor) + 0.105(MW) -0.63(Peptidylglycine monooxygenase inhibitor) -0.33(TGF beta receptor type I kinase inhibitor) -0.277(5 Hydroxytryptamine 4 agonist) + 0.211(Pim-2 kinase inhibitor) + 9.02(Length^3) -0.673(Prostaglandin EP3 antagonist) + 1.02(Uridine nucleosidase inhibitor) + 0.256(Sweating) + 0.47(Antipruritic. non-allergic) + 0.795(TGF beta receptor type II kinase inhibitor) + 0.393(KLK3 expression inhibitor) -0.113(DNA directed RNA polymerase inhibitor) + 0.129(Raf kinase B inhibitor) -0.835(Calpain small subunit 1 inhibitor) + 0.44(Targeting protein for Xklp2 inhibitor) + 0.416(MAO B substrate) + 0.157(Pyrimidine antagonist) + 0.577(Glutathione S-transferase P1 inhibitor) -0.349(Cystic fibrosis treatment) -0.861(Diacylglycerol kinase inhibitor) -0.508(Glycerate kinase inhibitor) -0.284(Interleukin 1b antagonist) + 0.502(Thromboxane antagonist) -0.332(EREG expression enhancer) -0.841(Beta 2 adrenoreceptor agonist) -0.0302(NumNegative) + 0.26(Headache) + 0.196(RET inhibitor) -0.2(Cyclin T1 inhibitor) -0.639(Dihydrodipicolinate synthase inhibitor) + 0.337(Anesthetic local) + 0.183(Alpha 2 adrenoreceptor antagonist) + 0.295(Ulcer. peptic) -0.284(Carcinogenic. rat. male. oral cavity) -0.184(Paraplegia) + 0.32(1-Acylglycerol-3-phosphate O-acyltransferase inhibitor) -0.297(Aryl-acylamidase inhibitor) -0.11(Antiviral (Hepatitis)) -0.143(Analgesic. opioid) -0.418(Acetoin dehydrogenase inhibitor) -0.206(Drowsiness) -0.388(Dopamine D1 antagonist) -0.526(ATP phosphoribosyltransferase inhibitor) -0.144(Glutamate (mGluR group II) antagonist) + 0.0527(Lactose synthase inhibitor) + 0.172(Excitatory amino acid transporter 1 inhibitor) + 0.286(Weight gain) + 0.185(Antiviral (Influenza)) -0.449(NOS3 expression inhibitor) + 0.341(Astringent) + 0.129(Antineoplastic alkaloid) + 0.167(DNA primase inhibitor) + 0.849(3-Hydroxyanthranilate 3.4-dioxygenase inhibitor) -0.264(Pruritus) -0.388(5 Hydroxytryptamine 6 antagonist) + 0.662(Glutamate (mGluR1) agonist) + 0.194(Cyclin-dependent kinase 7 inhibitor) + 0.375(CYP1A substrate) + 0.261(Probable DNA dC->dU-editing enzyme APOBEC-3A inhibitor) + 0.239(FGFR3 expression inhibitor) + 0.145(ErbB-4 antagonist) -0.358(Kallikrein 13 inhibitor) + 0.156(MHC Class II antagonist) + 0.222(Skin irritative effect) + 0.138(Urinary incontinence treatment) -0.396(Antileprosy) -0.1(Purinergic P2X7 antagonist) -0.416(UGT1A3 substrate) -0.133(Proto-oncogene tyrosine-protein kinase Yes inhibitor) + 0.302(Choline sulfotransferase inhibitor) -0.0935(Phosphorylase kinase gamma subunit 1 inhibitor) + 0.124(G-protein coupled bile acid receptor 1 antagonist) -0.591(SMN2 expression enhancer) + 0.177(Interleukin antagonist) + 0.247(IL1B expression enhancer) + 0.198(Cathepsin L2 inhibitor) + 0.187(Cardiodepressant) -0.12(Prostate disorders treatment) + 0.614(CYP4A11 inhibitor) + 0.16(Bulimia treatment) + 0.125(Interleukin 1 antagonist) -0.245(Antihistaminic) + 0.543(Phosphofructokinase-1 inhibitor) -0.517(Carbonic anhydrase stimulant) -0.34(UDP-3-O-acyl-N-acetylglucosamine deacetylase inhibitor) -0.346(Peptidyl-Lys metalloendopeptidase inhibitor) -0.139(MAP3K7 inhibitor) + 0.329(Phospholipase D inhibitor) + 0.335(Signal peptidase I inhibitor) + 0.352(Alkaline phosphatase inhibitor) -0.396(Glucosylceramidase inhibitor) -0.0936(Spasmolytic. urinary) -0.175(Beta-adrenergic receptor kinase inhibitor) + 0.311(STC2 expression enhancer) + 0.0679(Thiol protease inhibitor) -0.113(CC chemokine 5 receptor agonist) -0.552(Isopentenyl-diphosphate DELTA-isomerase inhibitor) + 0.118(Protein kinase B gamma inhibitor) -0.139(Carcinogenic. mouse. male. kidney) + 0.365(Uridine phosphorylase inhibitor) + 0.606(Neuraminidase inhibitor) -0.109(Plectin inhibitor) + 0.283(Pectin lyase inhibitor) -0.615(Orotate phosphoribosyltransferase inhibitor) + 0.442(Thromboxane A2 antagonist) + 0.786(Gentamicin 3'-N-acetyltransferase inhibitor) -0.168(Dementia treatment) -0.134(Purinergic P2X antagonist) + 0.109(ADAM inhibitor) + 0.0908(Antineurogenic pain) + 0.345(Beta-fructofuranosidase inhibitor) -0.261(Mannosyl-oligosaccharide glucosidase inhibitor) + 0.376(Succinate-CoA ligase (ADP-forming) inhibitor) -0.189(Phosphodiesterase I inhibitor) + 0.218(2-Nitropropane dioxygenase inhibitor) -0.0927(Threonine synthase inhibitor) -0.222(Protein Wnt-2 inhibitor) -0.0795(Ribosomal protein S6 kinase alpha 4 inhibitor) -0.122(MAP kinase 13 inhibitor) + 0.157(Phosphodiesterase 6G inhibitor) -0.106(Melatonin antagonist) -0.314(Dextransucrase inhibitor) -0.225(IFITM1 expression enhancer) -0.0904(Phosphodiesterase 5A inhibitor) -0.354(Protein phosphatase 2B inhibitor) + 0.0751(Phosphodiesterase 4C inhibitor) + 0.0917(Pepsin inhibitor) -0.257(Thiosulfate sulfurtransferase inhibitor) + 0.206(NOS2 expression enhancer) -0.13(Cyclic AMP agonist) + 0.234(MAP kinase signal-integrating kinase 1 inhibitor) + 0.134(Cholinergic) + 0.153(Cytochrome P450 stimulant) + 0.202(Formate dehydrogenase inhibitor) -0.098(Antiprotozoal (Amoeba)) -0.275(Nicotinic receptor delta subunit antagonist) -0.189(Lactate 2-monooxygenase inhibitor) -0.195(ATM kinase inhibitor) + 0.229(Dipeptidyl peptidase IX inhibitor) + 0.013(NumHal) + 0.0647(Protein synthesis inhibitor) -0.0667(Acetylcholine M2 receptor agonist) + 0.216(Pyruvate dehydrogenase kinase 2 inhibitor) + 0.0956(Integrin antagonist) -0.238(NRIP1 expression enhancer) + 0.358(UGT2B7Y substrate) + 0.0778(Estrogen agonist) + 0.114(Muscular dystrophy treatment) -0.124(Aryl-alcohol dehydrogenase inhibitor) + 0.0998(Spasmolytic. Papaverin-like) -0.0748(Hypotension) -0.217(Histamine H3 receptor antagonist) -0.079(EIF5A expression inhibitor) + 0.0855(Psychostimulant) + 0.0883(5 Hydroxytryptamine 1 antagonist) -0.12(Neuroleptic malignant syndrome) -0.0914(Splenomegaly) -0.0526(Peristaltic stimulant) + 0.247(NAD(P)+ transhydrogenase (B-specific) inhibitor) -0.0832(CYP3A substrate) + 0.191(3-Deoxy-7-phosphoheptulonate synthase inhibitor) -0.0883(Genotoxic) + 0.0465(Phosphodiesterase 4A inhibitor) + 0.0639(Cyanosis) -0.107(Insulin sensitizer) -0.0683(Cerebral hemorrhage) + 0.0674(Eye irritation. weak) -0.127(Chemopreventive) + 0.0516(Ca2+/calmodulin-dependent kinase II gamma inhibitor) -0.085(Histone acetyltransferase inhibitor) -0.0773(Arylamine N-Acetyltransferase substrate) + 0.0602(CYP1A inhibitor) -0.13(Tryptase inhibitor) + 0.0723(Carcinogenic. rat. female. esophagus) + 0.0183(Antiprotozoal) + 0.219(Polypeptide N-acetylgalactosaminyltransferase inhibitor) -0.0507(Antiseptic) -0.0708(MAO inhibitor) -0.106(Macrophage colony stimulating factor antagonist) + 0.0498(Carcinogenic. rat. male. all tumor bearing animals) -0.0369(Chemokine receptor antagonist) + 0.0812(Histamine H1 receptor antagonist) + 0.0735(Purinergic P2X2 antagonist) -0.0234(CDC25 phosphatase inhibitor) -0.0314(Ribosomal protein S6 kinase alpha 2 inhibitor) -0.029(Edema) + 0.0377(CYP1A2 inhibitor) + 0.0244(Protein kinase C delta inhibitor) + 0.0216(Clk dual-specificity kinase inhibitor) -0.0762(2-Oxoaldehyde dehydrogenase (NAD+) inhibitor) + 0.0953(Ketohexokinase inhibitor) + 0.0332(CYR61 expression enhancer) -0.0826(CYP24 substrate) -0.0188(Antidiuretic hormone agonist) -0.0877([hydroxymethylglutaryl-CoA reductase (NADPH)] kinase inhibitor) + 0.0232(Bronchoconstrictor) -0.06(ARHGDIA expression inhibitor) + 0.0199(Lck kinase inhibitor) + 0.0137(Trypsin III inhibitor) -0.0128(Antiemphysemic) -0.0395(5 Hydroxytryptamine 2 agonist) + 0.0437(AMP-activated protein kinase. gamma-1 subunit inhibitor) -0.0352(Delayed rectifier potassium channel blocker) -0.0111(Protein kinase C eta inhibitor) -0.0116(Skeletal muscle relaxant) -0.00667(Keratoses actinic (solar) treatment) + 0.00832(Ribonucleoside triphosphate reductase inhibitor) + 0.00719(NMDA receptor antagonist) -0.00311(Fatty acid elongase inhibitor) -0.00338(Amino acid-polyamine-organocation (APC) transporter antagonist) + 0.00274(Vanilloid 1 antagonist) -0.0066(Nicotinic receptor beta2 subunit antagonist) + 0.00501(Human herpesvirus 6 protease inhibitor) -0.00137(HCV NS3-helicase inhibitor) + 0.00498(Plasminogen activator stimulant) + 0.00136(Fibrinogen receptor antagonist) -0.00103(Enuresis) + 5.83

Model 15

-0.0953((R)-3-amino-2-methylpropionate-pyruvate transaminase inhibitor) + 0.399(Dysphoria) -0.218(Amyloid beta precursor protein antagonist) + 0.306(Hypothermic) -0.534(Neutropenia) -0.731(Length) + 25.9(Lipophilicity) + 0.174(Lipophilicity^2) + 0.138(NumAromAtoms) + 0.652(Bradycardic) -0.189(Endothelin receptor antagonist) + 0.242(Respiratory distress syndrome treatment) -0.523(Serine/threonine-protein kinase WEE1 inhibitor) + 0.00628(Thioredoxin glutathione reductase inhibitor) -0.423(Hexokinase stimulant) -0.318(Platelet antagonist) + 0.199(Glyceryl-ether monooxygenase inhibitor) + 0.222(Trypsin III inhibitor) + 0.132(NumPositive) + 0.293(Respiratory analeptic) -0.667(Carcinogenic) -0.551(CDK2 expression enhancer) -0.41(Glutamate dehydrogenase [NAD(P)+] inhibitor) + 1.5(Tyrosine transaminase inhibitor) + 0.28(AMP deaminase 3 inhibitor) -1.35(5 Hydroxytryptamine 2A agonist) -0.907(Cholesterol antagonist) -0.578(Phosphodiesterase VIII inhibitor) + 1.01(CYP19 substrate) + 0.672(Antifungal) + 0.673(NOS2 expression enhancer) + 0.472(Dyskinesia) -0.228(MAP kinase kinase 2 inhibitor) -0.302(Hypotonia) -0.0855(NumAcceptor) -0.895(Thiosulfate sulfurtransferase inhibitor) + 0.469(Ceramide glucosyltransferase inhibitor) -0.000549(Carcinogenic. mouse. female. vascular system) -0.43(Antimycobacterial) -0.217(CYP3A4 inhibitor) + 0.477(Cytokine production stimulant) + 0.856(Calmodulin-domain protein kinase 1 inhibitor) + 0.961(MYC expression enhancer) -0.752(Antihematotoxic) -0.226(Cardioprotectant) + 0.328(Insulin like growth factor 1 antagonist) + 0.128(Carcinogenic. mouse. female. lung) + 1.24(Methionyl aminopeptidase inhibitor) + 0.245(Colony stimulating factor antagonist) -0.381(GABA transporter 2 inhibitor) + 0.406(Inosine monophosphate dehydrogenase 1 inhibitor) + 0.523(AMP-activated protein kinase. gamma-1 subunit inhibitor) -0.578(Inner centromere protein inhibitor) -0.573(Antiuremic) -0.525(Agaritine gamma-glutamyltransferase inhibitor) -0.161(Pruritus) -0.501(CYP3A5 substrate) + 0.4(Endometrios treatment) -0.237(Retinoprotector) -0.0749(AR expression inhibitor) -0.518(Diacylglycerol kinase inhibitor) + 0.291(NR0B2 expression enhancer) + 0.119(CDC-like kinase 1 inhibitor) -0.326(Keratoses actinic (solar) treatment) -1.13(NRIP1 expression enhancer) + 0.378(Ocular toxicity) + 0.356(DNA gyrase subunit A inhibitor) -0.429(Akinesia) + 9.21(Volume) + 1.29(Formyl peptide receptor antagonist) -0.565(Vascular endothelial growth factor 3 antagonist) -1.23(Cholesterol esterase inhibitor) + 0.279(Ribosomal protein S6 kinase. 70-kDa inhibitor) -0.171(Growth stimulant) -17.3(Volume^2) + 0.461(GABA uptake inhibitor) -0.517(Nicotinic neuronal receptor agonist) + 0.23(Hepatic disorders treatment) + 0.192(Acidosis. metabolic) + 0.112(CYP4F2 inhibitor) + 0.232(Carcinogenic. rat. male. kidney) + 0.211(Postmenopausal disorders treatment) -0.189(Myocardial ischemia treatment) + 0.241(Matrix metalloproteinase 4 (membrane-type) inhibitor) + 0.251(5 Hydroxytryptamine release stimulant) + 0.867(2-(acetamidomethylene)succinate hydrolase inhibitor) -0.196(Purinergic P2 antagonist) + 0.27(Dopamine precursors) + 0.385(CYP2G1 substrate) + 0.28(ATP-dependent RNA helicase inhibitor) -0.232(Hypertensive) -0.144(Carbonyl reductase [NADPH] 1 inhibitor) -0.281(IL12B expression inhibitor) -0.481(Cyclin D3 inhibitor) + 0.26(Thyroid hormone alpha antagonist) -0.416(Metalloproteinase-3 inhibitor) -0.44(Glycosylceramidase inhibitor) -0.3(Antifibrinolytic) -0.467(Anesthetic inhalation) + 0.464(Phosphatidate cytidylyltransferase inhibitor) -0.251(Mineralocorticoid antagonist) + 0.0426(Elastase 2 inhibitor) + 0.366(ATPase inhibitor) + 1.1(Arachidonic acid antagonist) + 0.0986(Ca2+/calmodulin-dependent kinase IV inhibitor) + 0.153(Smooth muscle myosin light chain kinase inhibitor) -0.191(Melatonin 1 agonist) + 0.291(GABA C receptor rho-2 antagonist) -0.45(Gonadotropin antagonist) -0.91(Andropause treatment) -0.901(Histone-lysine N-methyltransferase. H3 lysine-9 specific 3 inhibitor) -0.316(Mydriatic) + 0.398(TRPV2 blocker) + 0.766(Cytochrome c oxidase inhibitor) + 0.359(Phospholipase D inhibitor) -0.237(Eye irritation. inactive) -0.273(CYP3A substrate) -0.212(BTG1 expression enhancer) + 0.24(Imidazoleacetate 4-monooxygenase inhibitor) -0.214(RNA directed DNA polymerase inhibitor) -0.997(Glutamate (mGluR6) antagonist) -0.183(Neuropeptide FF1 antagonist) + 0.725(NMDA receptor glycine site agonist) -0.9(SMN2 expression enhancer) + 0.272(Calcium channel blocker) -1.12(Carboxypeptidase E inhibitor) + 0.238(Muscle weakness) + 0.46(2-Dehydropantolactone reductase (A-specific) inhibitor) -0.34(Lactoylglutathione lyase inhibitor) + 0.183(G-protein coupled bile acid receptor 1 antagonist) -0.641(CYP1B1 inhibitor) + 0.223(Antiprotozoal (Leishmania)) + 0.171(Adenylate cyclase VIII inhibitor) -0.133(Aminopeptidase A inhibitor) + 0.402(GSTP1 expression enhancer) -0.425(Antihypertriglyceridemic) -0.222(Phosphodiesterase III inhibitor) + 0.277(Alpha 2 adrenoreceptor antagonist) + 0.747(Colony stimulating factor agonist) + 0.196(Lipase inhibitor) + 0.376(Estrogen beta receptor agonist) -0.14(Estradiol 17 beta-dehydrogenase 1 inhibitor) -0.64(Indanol dehydrogenase inhibitor) + 0.218(Pyrimidine antagonist) + 0.318(Antiparkinsonian. rigidity relieving) + 0.592(Imidazoline I2 receptor antagonist) + 0.971(Progesterone receptor B1 antagonist) + 0.193(VLA-4 antagonist) -0.962(Ethanolamine kinase inhibitor) + 0.149(Rho-associated kinase II inhibitor) + 0.283(Carcinogenic. rat. female. lung) -0.231(Carbonic anhydrase II stimulant) -0.601(Histone deacetylase 10 inhibitor) -0.17(Presenilin 1 inhibitor) + 0.445(Vitamin K-dependent protein C inhibitor) + 0.112(MW) + 0.416(Serine-glyoxylate transaminase inhibitor) -0.306(Aggrecanase 1 inhibitor) -0.147(T cell receptor gamma-delta antagonist) + 9.84(Length^3) -0.245(Lipid peroxidase inhibitor) -0.0668(Antiallergic) -0.387(AMP nucleosidase inhibitor) -0.488(Hematopoietic inhibitor) + 0.156(Sucrase-isomaltase inhibitor) + 0.161(CCL2 expression enhancer) -0.0261(NumNegative) -0.239(Prokinetic) -0.751(Testosterone 17beta-dehydrogenase inhibitor) + 0.445(Protein-tyrosine phosphatase LC-PTP inhibitor) + 0.246(Ca2+/calmodulin-dependent kinase II gamma inhibitor) + 0.303(CDH1 expression enhancer) -0.554(Dihydrodipicolinate synthase inhibitor) + 0.357(Purinergic P2X2 antagonist) + 0.182(K(ir) 6.2 channel activator) + 0.59(HSPA1B expression enhancer) + 0.22(Integrin alpha4beta1 antagonist) -0.31(SULT1A3 substrate) + 0.234(Trypsin II inhibitor) + 0.309(Inositol-polyphosphate 5-phosphatase inhibitor) + 0.147(Interleukin 1 antagonist) -0.471(YWHAE expression inhibitor) + 0.598(Adenylate kinase inhibitor) -0.327(Aldehyde dehydrogenase inhibitor) -0.203(Lysophosphatidic acid 2 receptor antagonist) -0.642(Lysozyme inhibitor) + 0.177(Protein kinase B inhibitor) -0.211(Phosphodiesterase 7A inhibitor) + 0.117(Benzodiazepine antagonist) + 0.154(Interleukin 5 antagonist) + 0.752(Glycerol-3-phosphate dehydrogenase (NAD+) inhibitor) + 0.177(Adenosine A1 receptor agonist) -0.206(Tyrosine-protein kinase TXK inhibitor) + 0.639(TGF beta receptor type II kinase inhibitor) -0.153(Adenosylhomocysteine nucleosidase inhibitor) + 0.326(Lanosterol 14 alpha demethylase inhibitor) + 0.346(Anticataract) -0.152(Preterm labor treatment) -0.464(Nicotinate phosphoribosyltransferase inhibitor) + 0.21(Prolyl aminopeptidase inhibitor) -0.124(Protein-tyrosine phosphatase F inhibitor) + 0.16(Carbonic anhydrase VB inhibitor) + 0.365(KLK3 expression inhibitor) + 0.178(Phosphodiesterase 6B inhibitor) -0.407(Sphingosine 1-phosphate receptor 2 antagonist) -0.107(Antineoplastic (lymphocytic leukemia)) + 0.165(Pepsin inhibitor) -0.127(Phosphatidylinositol 3-kinase alpha inhibitor) + 0.135(Alcohol dehydrogenase substrate) -0.286(Interferon antagonist) + 0.26(Henoch-Schonlein purpura) -0.173(Galactorrhea) -0.737(GMP synthase inhibitor) -0.39(Elastase inhibitor) + 0.413(Sulfinoalanine decarboxylase inhibitor) -0.286(Acyl-CoA hydrolase inhibitor) -0.102(Calcium channel N-type blocker) + 0.301(Phosphorylase kinase inhibitor) -0.329(Excitatory amino acid transporter 3 inhibitor) -0.117(COL1A1 expression enhancer) -0.139(Potassium channel (Inward rectifier) 11 blocker) -0.166(Hypercholesterolemic) + 0.103(Proto-oncogene tyrosine-protein kinase Fgr inhibitor) + 0.169(Carcinogenic. rat. male. all tumor bearing animals) + 0.0849(Osteoarthritis treatment) + 0.0843(Urologic disorders treatment) + 0.109(Gastrointestinal disorders treatment) -0.246(Alpha adrenoreceptor agonist) + 0.174(Lichenoid eruption) -0.108(Neuropeptide Y5 antagonist) + 0.152(Chorea) + 0.203(ESR2 expression enhancer) + 0.139(Glycogen synthase kinase-3 inhibitor) -0.0795(Restenosis treatment) + 0.108(Elastase 3A inhibitor) + 0.245(NF-E2-related factor 2 stimulant) -0.259(SUMO-activating enzyme subunit 1 inhibitor) + 0.0792(Inositol 1.4.5-triphosphate receptor 1 antagonist) -0.174(KPNA2 expression inhibitor) + 0.116(Sentrin-specific protease 8 inhibitor) -0.105(Sphingosine 1-phosphate receptor 5 antagonist) -0.167(AKR1C1 expression enhancer) -0.0946(Homoserine O-acetyltransferase inhibitor) -0.165(Aryl-alcohol dehydrogenase inhibitor) + 0.231(Sleep apnea treatment) -0.103(Gastroesophageal reflux disease treatment) + 0.0919(Phosphoglycerate kinase 2 inhibitor) + 0.168(Parotid gland enlargement) + 0.3(Thromboxane A2 antagonist) + 0.118(Antiseborrheic) -0.0927(Microtubule stabilization) + 0.145(MMP2 expression inhibitor) -0.113(5 Hydroxytryptamine 1F agonist) + 0.167(Extrapyramidal disorders treatment) + 3.69(Volume^3) + 0.0947(Toxic. respiration) -0.274(CDC25C inhibitor) + 0.09(Alpha 2c adrenoreceptor agonist) -0.125(BCL2L1 expression inhibitor) -0.155(DNA-(apurinic or apyrimidinic site) lyase inhibitor) -0.114(Sensitization) + 0.0474(Antineoplastic (liver cancer)) -0.238(Glutamate (mGluR2) antagonist) + 0.0361(Antiobesity) + 0.113(Cardiodepressant) -0.0857(Cyclin B1 inhibitor) -0.072(Renin inhibitor) -0.0825(Phosphatidylinositol 3-kinase gamma inhibitor) -0.146(CCNE1 expression inhibitor) + 0.0949(Hemolysis) -0.0559(Acetylcholine M4 receptor agonist) + 0.125(2-Nitropropane dioxygenase inhibitor) -0.179(IGF1 expression enhancer) + 0.0586(Integrin alphaLbeta2 antagonist) -0.0644(Kainate receptor 1 antagonist) -0.125(Endothelin B receptor antagonist) + 0.189(CYP4B substrate) -0.048(Anticonvulsant) -0.0562(TRKA antagonist) -0.165(Myristoyl transferase 1 inhibitor) + 0.0108(NumHal) -0.0952(MGMT expression enhancer) + 0.0508(Sucrose-phosphate synthase inhibitor) + 0.0982(DELTA14-sterol reductase inhibitor) -0.126(CYP2B4 substrate) + 0.0351(Psychotropic) -0.142(Methylenetetrahydrofolate dehydrogenase (NADP+) inhibitor) + 0.0351(Thrombolytic) + 0.181(Adenosine A3 receptor agonist) + 0.0426(Bombesin agonist) -0.0916(Monophenol monooxygenase inhibitor) -0.122(ATM kinase inhibitor) + 0.0232(Atherosclerosis treatment) -0.0851(MMP9 expression enhancer) -0.0767(UDP-glucuronosyltransferase substrate) + 0.202(Asparagine-oxo-acid transaminase inhibitor) + 0.119(CYP11B2 expression enhancer) -0.0404(Bone morphogenic protein inhibitor) + 0.0855(Geranylgeranyltransferase inhibitor) -0.182(Cyclomaltodextrin glucanotransferase inhibitor) + 0.0696(Carcinogenic. rat. female. vascular system) -0.0516(TGF beta receptor type I kinase inhibitor) + 0.112(MAP kinase signal-integrating kinase 1 inhibitor) -0.0387(Angiotensin-converting enzyme 2 inhibitor) + 0.0267(Src kinase inhibitor) + 0.0298(Histone deacetylase class IIb inhibitor) -0.056(Putative hexokinase HKDC1 inhibitor) -0.028(Sigma 1 receptor antagonist) -0.0411(IFNG expression inhibitor) -0.0615(Amyloid beta aggregation inhibitor) + 0.0439(CYR61 expression enhancer) -0.0634(Protein Wnt-2 inhibitor) + 0.0428(Stromelysin 2 inhibitor) + 0.0169(Integrin alpha1beta1 antagonist) -0.0108(HIV attachment inhibitor) + 0.0164(Carcinogenic. rat. male. stomach) + 0.0583(Uridine phosphorylase inhibitor) -0.0149(Teratogen) -0.0379(Tryptase inhibitor) -0.0239(Sentrin-specific protease 7 inhibitor) + 0.0423(Acetylserotonin O-methyltransferase inhibitor) -0.0557(Pyruvate. phosphate dikinase inhibitor) + 0.0376(Cyclin D2 inhibitor) -0.00733(Elongation of very long chain fatty acids protein 3 inhibitor) + 0.0107(Behavioral disturbance) + 0.00889(Liver X receptor alpha agonist) -0.00999(Phosphatidylinositol 3-kinase delta inhibitor) + 0.00602(Baculoviral IAP repeat-containing protein 3 inhibitor) + 0.0214(Prephenate dehydratase inhibitor) -0.0167(Prostaglandin EP3 antagonist) -0.0219(Rhodopsin kinase inhibitor) -0.00729(CASP9 expression enhancer) -0.00292(Bone morphogenic protein 1 inhibitor) + 0.00389(Glycogen (starch) synthase inhibitor) -8.2E-06(Cyclin-dependent kinase 9 inhibitor) + 6.15

Model 16

+ 0.512(Miotic) -0.351(Cystathionine gamma-lyase inhibitor) -0.337(Neutropenia) + 0.158(NumAromAtoms) -0.0691(Alcohol dehydrogenase I inhibitor) -0.139(Aggrecanase inhibitor) -0.328(5 Lipoxygenase activating protein inhibitor) -0.963(Phosphodiesterase 1B inhibitor) + 0.391(Respiratory analeptic) -0.841(Glyceraldehyde-3-phosphate dehydrogenase (NADP+) inhibitor) + 0.337(Glyceryl-ether monooxygenase inhibitor) + 0.0701(Consciousness alteration) -0.353(Nephrotoxic) -0.101(NumAcceptor) + 0.609(Carcinogenic. rat. male. lung) + 0.227(Alpha 2 adrenoreceptor antagonist) -0.259(Antiviral (Poxvirus)) -0.469(T-cell protein-tyrosine phosphatase inhibitor) -0.611(Bradykinin antagonist) + 0.0354(Sphingosine 1-phosphate receptor 4 antagonist) + 0.917(S-adenosyl-L-methionine decarboxylase inhibitor) + 0.453(Corticosteroid-like) -0.247(HIV-1 integrase inhibitor) -0.501(Phosphodiesterase 8B inhibitor) -1.29(Procollagen C-endopeptidase inhibitor) + 0.639(CYP4F substrate) + 0.452(Inosine monophosphate dehydrogenase 1 inhibitor) + 2.77(Length) + 1.37(Phospholipase inhibitor) -0.498(Aspartate ammonia-lyase inhibitor) -1.1(MAO B inhibitor) -0.000232(Lipophilicity^3) + 0.151(MHC Class II antagonist) + 0.35(Antiviral (Influenza A)) -0.403(Purinergic P2T antagonist) + 0.444(HMGCS1 expression enhancer) -0.302(Neuropeptide FF1 antagonist) -0.199(KPNB1 expression inhibitor) -0.628(Cytotoxic) + 0.135(Sodium/glucose cotransporter 2 inhibitor) + 0.62(Anticataract) + 1.2(Acetolactate synthase inhibitor) -0.743(Dermatitis) + 0.194(Antiprotozoal) -0.383(Serine/threonine-protein kinase WEE1 inhibitor) + 0.364(HIV-1 integrase (Overall Integration) inhibitor) -0.479(Antiacne) + 0.513(Amylin agonist) + 0.399(Caspase 7 inhibitor) -1.05(Histone deacetylase 7 inhibitor) + 0.265(Nicotinic receptor alpha7 subunit antagonist) -0.856(Glycosuria) -0.537(Glutamate (mGluR) antagonist) -0.901(Thromboxane synthase inhibitor) + 0.77(Pain) -0.372(Pyruvate dehydrogenase kinase 1 inhibitor) + 0.234(Protein kinase B beta inhibitor) + 0.274(MAP kinase 3 inhibitor) -0.855(UDP-3-O-acyl-N-acetylglucosamine deacetylase inhibitor) + 0.556(Beta 1 adrenoreceptor antagonist) + 1.53(Methionyl aminopeptidase 1 inhibitor) + 0.476(CDKN1A expression enhancer) + 0.462(Cytosolic phospholipase A2 inhibitor) -0.266(Phosphatidylinositol 3-kinase alpha inhibitor) -0.339(Myocardial ischemia treatment) + 0.459(Retinoid X receptor antagonist) -0.521(Carcinogenic. mouse. female) -0.364(Antihistaminic) -0.293(Epithelial sodium channel blocker) + 0.385(ATP-dependent RNA helicase inhibitor) -0.275(CYP2A substrate) + 0.328(Antineoplastic (endocrine cancer)) -0.422(CDK2/cyclin E inhibitor) + 0.0891(NumPositive) -0.0205(Injection site pain) -0.149(Sigma 1 receptor antagonist) + 0.213(Antibiotic Penicillin-like) -0.297(Phospholipase A2 X inhibitor) + 10.6(Lipophilicity) -0.279(11-Beta-hydroxysteroid dehydrogenase 1 inhibitor) + 0.261(Sentrin-specific protease 6 inhibitor) -0.217(Antiviral (Hepatitis C)) + 12.1(Volume) + 0.192(Xanthine-like) -0.991(Adenylylsulphatase inhibitor) + 0.94(Gestagen-like) -0.521(DDIT4 expression enhancer) + 0.216(Metalloproteinase-11 inhibitor) + 0.354(Neurokinin 2 antagonist) + 0.29(Signal peptidase I inhibitor) + 0.305(5 Hydroxytryptamine 5 antagonist) -0.381(Platelet growth factor antagonist) -0.266(Hemozoin inhibitor) + 0.311(Mood disorders treatment) + 0.701(Adenosine A3 receptor antagonist) + 0.21(Eye irritation. moderate) -1.12(Dihydrodipicolinate synthase inhibitor) + 0.802(Alanine transaminase inhibitor) + 0.447(Plasminogen activator inhibitor antagonist) -0.323(Lysophosphatidic acid 3 receptor antagonist) -0.482(Antiinfective) + 0.453(AMP-activated protein kinase. gamma-1 subunit inhibitor) + 0.303(Prolyl aminopeptidase inhibitor) -0.255(Guanylate cyclase 1 stimulant) + 0.88(CYP24A1 expression enhancer) -0.146(Glutamate (mGluR group I) agonist) + 0.459(Bronchoconstrictor) + 0.29(Integrin alpha1beta1 antagonist) -0.214(Carbonyl reductase [NADPH] 1 inhibitor) + 0.545(CXCL12 expression enhancer) -0.023(Phosphatidylinositol 3-kinase delta inhibitor) + 0.182(Dopamine precursors) -11.6(Volume^2) -0.844(Histone-lysine N-methyltransferase. H3 lysine-9 specific 3 inhibitor) + 0.465(Estrogen alpha receptor agonist) -0.463(YWHAE expression inhibitor) -0.0655(Endocrine disruptor) -0.22(Estradiol 17 beta-dehydrogenase 1 inhibitor) + 0.32(Hyperglycemic) -1.04(Carbonic anhydrase stimulant) -0.167(Retinoprotector) + 0.61(Calcium channel activator) + 0.634(Glutamate decarboxylase inhibitor) -0.374(Glycine hydroxymethyltransferase inhibitor) -0.2(Interferon inducer) + 0.22(Protein kinase A inhibitor) + 0.11(Dry eye) + 0.788(Peptide deformylase inhibitor) -0.822(Chemokine receptor agonist) -0.294(CYP3A4 expression enhancer) + 0.611(Chloride/bicarbonate exchanger inhibitor) -0.287(Retinoid X receptor agonist) -0.256(Antimetastatic) -0.437(Diacylglycerol cholinephosphotransferase inhibitor) + 0.274(Carcinogenic. rat. female. nasal cavity) + 0.191(Respiratory failure) -1.04(UGT2B20 substrate) + 0.79(Antihypotensive) -0.776(mRNA (nucleoside-2'-O-)-methyltransferase inhibitor) + 0.556(DNA methyltransferase I inhibitor) -0.555(Peptidyl-prolyl cis-trans isomerase FKBP1A inhibitor) + 0.12(Chronic obstructive pulmonary disease treatment) + 0.775(HCV NS3/NS4A protease inhibitor) -0.538(Procollagen galactosyltransferase inhibitor) + 0.261(Hemolysis) -0.673(3-Oxoacyl-[acyl-carrier-protein] synthase inhibitor) -0.828(Aspartate carbamoyltransferase inhibitor) -0.323(Poly(ADP-ribose) polymerase 1 inhibitor) + 0.177(Gout treatment) + 0.626(Tyrosine phenol-lyase inhibitor) + 0.157(Growth hormone agonist) + 0.877(2-(acetamidomethylene)succinate hydrolase inhibitor) + 0.218(MAP-kinase-activated kinase 2 inhibitor) -0.322(Antitoxic) -0.189(Nicotinic acid receptor 1 agonist) -0.864(N4-(beta-N-acetylglucosaminyl)-L-asparaginase inhibitor) + 0.281(Diuretic inhibitor) + 0.564(Lysine carboxypeptidase. catalytic subunit inhibitor) -0.222(Choreoathetosis) + 0.142(Paranoia) + 0.296(Cytochrome c oxidase inhibitor) -0.193(Dopamine transporter inhibitor) + 0.234(Paralysis) -0.2(MAP3K7 inhibitor) + 0.464(Phosphodiesterase VII inhibitor) -0.106(Antihypertensive) + 0.524(CYP2C18 substrate) -0.42(Agaritine gamma-glutamyltransferase inhibitor) -0.206(Cardiovascular analeptic) + 0.412(Carcinogenic. group 1) + 0.652(Glyceraldehyde-3-phosphate dehydrogenase (phosphorylating) inhibitor) -0.363(Chymase inhibitor) + 0.73(SUMO-conjugating enzyme UBC9 inhibitor) + 0.829(UGT2B17 substrate) -0.19(Neurotrophic factor) -0.909(Calpain small subunit 1 inhibitor) -0.253(Scytalone dehydratase inhibitor) -0.292(Menstruation disorders treatment) -0.393(Arylamine N-Acetyltransferase substrate) + 0.806(Human papillomavirus - 16 inhibitor) -0.361(Aryl-alcohol dehydrogenase inhibitor) + 0.159(Farnesoid X receptor agonist) -0.586(Andropause treatment) -0.218(Aggrecanase 1 inhibitor) + 0.0851(Lipophilicity^2) -0.0258(NumNegative) -0.245(Immunomodulator) -0.212(CYP2C8 substrate) + 0.149(Cruzipain inhibitor) + 0.217(GABA receptor agonist) + 0.907(N-acylneuraminate cytidylyltransferase inhibitor) -0.199(Carcinogenic. rat. female. thyroid gland) -0.648(Protein Wnt-2 inhibitor) + 0.345(Chitinase inhibitor) + 0.106(Vanilloid antagonist) + 0.16(Janus tyrosine kinase 1 inhibitor) -0.331(Endo-1.4-beta-xylanase inhibitor) -0.218(Aurora-B kinase inhibitor) -0.349(UGT1A3 substrate) + 0.163(Antiprotozoal (Coccidial)) + 0.1(Trypsin III inhibitor) + 0.158(Signal transduction pathways inhibitor) + 0.397(GST M substrate) -0.769(Glucose-1-phosphate adenylyltransferase inhibitor) -0.358(Antineoplastic antimetabolite) + 0.212(Weight gain) + 0.263(Inotropic) -0.203(Gastrin inhibitor) + 0.653(Postcoital contraceptive) + 0.0858(Integrin alphaLbeta2 antagonist) + 0.301(Arylamine N-acetyltransferase inhibitor) + 0.287(Choline sulfotransferase inhibitor) -0.165(Carcinogenic. rat. female. uterus) + 0.517(Caspase 8 inhibitor) + 0.0569(MW) -0.245(Glutaminase inhibitor) + 0.147(Agranulocytosis) + 0.479(Cellulose 1.4-beta-cellobiosidase inhibitor) -0.0568(Bone diseases treatment) -0.489(Prostaglandin E2 antagonist) -0.729(GMP synthase inhibitor) -0.381(RNA synthesis inhibitor) -0.225(Heat shock protein antagonist) -0.137(Transcription factor E2F1 inhibitor) + 0.322(Cytokine modulator) -0.222(CYP2C9 inducer) -0.272(Macrophage migration inhibitory factor inhibitor) -0.123(SLC7A5 expression enhancer) -0.196(CYP3A substrate) + 0.0705(Antiglaucomic) + 0.22(ABCC2 expression enhancer) -0.0775(Catalase stimulant) + 0.588(Cytochrome oxidase inhibitor) -0.126(Antineoplastic (thyroid cancer)) -0.299(Fatty acid oxidation inhibitor) -0.163(SCD expression enhancer) + 0.13(Eukaryotic translation initiation factor 2-alpha kinase 3 inhibitor) -0.413(3-Alpha-hydroxysteroid dehydrogenase type II inhibitor) + 0.375(Carbonic anhydrase inhibitor) + 0.214(Nav1.8 sodium channel blocker) -0.3(Somatostatin 3 antagonist) -0.129(MAP kinase 13 inhibitor) -0.157(Gonadotropin antagonist) + 0.125(Opioid mu 1 receptor antagonist) + 0.353(Fatty acid binding protein inhibitor) + 0.321(Indoleamine-pyrrole 2.3-dioxygenase inhibitor) -0.51(Phosphodiesterase 1C inhibitor) + 0.35(Glutamate (mGluR group I) antagonist) + 0.0866(EphA2 antagonist) + 0.0927(Histone deacetylase class II inhibitor) + 0.0697(Cachexia treatment) -0.159(Catechol 2.3-dioxygenase inhibitor) -0.236(Abortion inducer) + 0.104(Antinephritic) -0.175(Nucleotide-binding oligomerization domain-containing protein 2 inhibitor) -0.221(Choline kinase inhibitor) + 0.0202(NumDonor) -0.0841(Carbonic anhydrase IX inhibitor) -0.377(Histone deacetylase class IIa inhibitor) + 2.76(Length^3) + 0.0661(Cathepsin F inhibitor) -0.114(MAP kinase 12 inhibitor) + 0.0782(Phosphodiesterase 6C inhibitor) + 0.151(IL5 expression inhibitor) -0.0926(Carcinogenic. rat. male. esophagus) + 0.063(Luteinizing hormone-releasing hormone antagonist) + 0.0384(Antianginal) -0.158(Sphingosine 1-phosphate receptor antagonist) -0.0499(Purine antagonist) -0.153(Sleep apnea treatment) -0.0627(Antimigraine) -0.0906(PCNA expression enhancer) -0.0423(RNA directed DNA polymerase inhibitor) -0.185(Tryptase gamma inhibitor) -0.0972(Magnesium-protoporphyrin IX monomethyl ester (oxidative) cyclase inhibitor) -0.295(Inositol-3-phosphate synthase inhibitor) + 0.109(MT2A expression enhancer) -0.0622(Ribosomal protein S6 kinase. 90-kDa inhibitor) + 0.158(Phosphate acetyltransferase inhibitor) + 0.0499(Phosphodiesterase 4B inhibitor) + 0.0464(Adenosine A1 receptor agonist) + 0.181(Follicle-stimulating hormone antagonist) + 0.176(Arachidonic acid antagonist) + 0.0783(Pectate lyase inhibitor) + 0.139(Adenylate cyclase V inhibitor) -0.0748(Respiratory impairment) + 0.061(Radioprotector) + 0.184(Phosphorylase kinase inhibitor) + 0.052(D-aspartate oxidase inhibitor) -0.0532(Serine-type D-Ala-D-Ala carboxypeptidase inhibitor) -0.116(NOS2 expression inhibitor) + 0.0468(DNA primase inhibitor) -0.0434(Purinergic receptor antagonist) + 0.0994(Monoamine oxidase substrate) -0.143(Myeloperoxidase inhibitor) -0.0546(Protein kinase C beta I inhibitor) + 0.0447(Purinergic P2Y1 antagonist) + 0.0795(Nitrilase inhibitor) + 0.0355(Dual specificity phosphatase inhibitor) + 0.0534(Ca2+/calmodulin-dependent kinase II delta inhibitor) -0.0324(T cell receptor antagonist) -0.213(Cellulose synthase (UDP-forming) inhibitor) -0.131(Sphingosine kinase inhibitor) + 0.099(JNK mitogen-activated protein kinase inhibitor) -0.043(Skeletal muscle relaxant) + 0.21(CYP4F3 substrate) + 0.0435(Endocannabinoid uptake inhibitor) + 0.0671(Tyrosine 3 hydroxylase inhibitor) + 0.0288(Purinergic P2X1 antagonist) -0.0439(5 Hydroxytryptamine 2C antagonist) + 0.0231(Urinary incontinence treatment) -0.0314(T cell receptor gamma-delta antagonist) -0.023(Mucosal addressin cell adhesion molecule 1 inhibitor) + 0.037(Emetic) + 0.0513(Hematopoietic) + 0.0183(Inositol 1.4.5-triphosphate receptor 1 antagonist) + 0.0132(Antileukemic) -0.0716(4-Hydroxy-2-oxoglutarate aldolase inhibitor) + 0.0204(Carcinogenic. rat. female. ear Zymbals gland) -0.0362(Genotoxic) + 0.0778(Adenylate kinase inhibitor) + 0.0586(Nuclear factor of activated T-cells cytoplasmic 2 inhibitor) -0.0497(Guanylate cyclase inhibitor) -0.073(Zinc finger protein GLI1 inhibitor) + 0.00341(NumHal) + 0.0503(Peroxisome proliferator-activated receptor gamma antagonist) -0.0642(Rotamase (FKBP14) inhibitor) -0.0336(Galactolipase inhibitor) -0.015(Antidiuretic hormone agonist) -0.00899(Analgesic. non-opioid) -0.0123(Fibroblast growth factor 2 antagonist) + 0.0642(Procollagen-proline 3-dioxygenase inhibitor) + 0.0073(Rheumatoid arthritis treatment) + 0.0398(UGT2B7 substrate) -0.0475(Calcium-independent phospholipase A2 inhibitor) + 0.0176(Neurokinin antagonist) -0.0218(VEGFA expression enhancer) -0.0183(Trans-1.2-dihydrobenzene-1.2-diol dehydrogenase inhibitor) -0.00577(Tyrosine kinase inhibitor) + 0.00621(Prolactin inhibitor) -0.00239(HSPA8 expression inhibitor) -0.00193(HMG CoA reductase inhibitor) + 0.000708(Hypersexuality) + 0.000704(PTGS2 expression inhibitor) + 5.66

Model 17

-0.509(HCV NS5B polymerase inhibitor) + 0.194(NumAromAtoms) + 0.589(Hypothermic) + 0.284(Adenylate cyclase I stimulant) + 0.19(Adenosylmethionine-8-amino-7-oxononanoate transaminase inhibitor) + 0.15(Spasmogenic) -0.329(Antiulcerative) -0.11(NumAcceptor) + 0.46(Carcinogenic. rat. female. nasal cavity) -2.35(N-formylglutamate deformylase inhibitor) -1.29(MAO B inhibitor) + 3.17(Length) -0.66(Cytostatic) -0.617(Matrix metalloproteinase 3 (membrane-type) inhibitor) + 0.0724(Antineoplastic (uterine cancer)) -0.64(Orotate phosphoribosyltransferase inhibitor) + 0.33(FABP1 expression enhancer) + 0.331(CYP11B2 inhibitor) -1.02(4-Hydroxy-2-oxoglutarate aldolase inhibitor) -0.244(Platelet aggregation inhibitor) -0.00975(G protein-coupled receptor 7 antagonist) + 0.444(CYP2C18 inhibitor) -0.252(Topoisomerase II alpha inhibitor) + 0.377(Uterine relaxant) + 0.345(Ileal bile acid transport inhibitor) -0.276(CYP3A4 inhibitor) -0.262(Apical sodium codependent bile acid transporter inhibitor) + 0.112(Membrane integrity antagonist) + 0.342(Antieczematic atopic) -0.402(Phosphodiesterase VIII inhibitor) -0.258(MAP kinase kinase 2 inhibitor) + 0.091(Lipophilicity^2) + 0.454(Inosine monophosphate dehydrogenase 1 inhibitor) -0.525(CYP2C substrate) -0.302(T-cell protein-tyrosine phosphatase inhibitor) + 0.862(FOS expression enhancer) + 0.736(Carbonic anhydrase VIII inhibitor) + 1.33((R)-aminopropanol dehydrogenase inhibitor) -0.464(Acylphosphatase inhibitor) -0.0413(Acetylcholine M2 receptor agonist) -0.459(VCAM-1 antagonist) + 0.533(15-Lipoxygenase 2 inhibitor) -0.719(Carcinogenic. rat. male) + 0.0381(Histone deacetylase 6 inhibitor) -0.229(CDK1/cyclin B inhibitor) + 0.206(Irritable Bowel syndrome treatment) -0.348(Mucosal addressin cell adhesion molecule 1 inhibitor) -0.464(Galactolipase inhibitor) + 0.539(UDP-glucose 4-epimerase inhibitor) + 0.919(Thymidine kinase (Herpes simplex virus 2) inhibitor) + 0.404(Diabetic neuropathy treatment) -1.01(Quinone reductase 2 inhibitor) -1.09(Potassium channel (Ca-activated) activator) + 0.419(Glycogen synthase kinase-3 beta inhibitor) + 1.09(CYP2G1 substrate) + 0.33(Menopausal disorders treatment) -0.191(Analgesic) + 0.331(Glucocorticoid antagonist) + 0.548(Integrin alpha4 antagonist) + 0.348(Carcinogenic. rat. female. lung) + 0.232(Human T-cell leukemia virus type I protease inhibitor) + 0.891(Formate dehydrogenase inhibitor) -0.203(SUMO-activating enzyme subunit 1 inhibitor) -0.193(Complement C3a chemotactic receptor antagonist) -0.151(ABCA1 expression enhancer) -1.37(Sigma 2 receptor antagonist) + 11(Lipophilicity) + 0.664(Caspase 3 inhibitor) -0.163(Melatonin 3 antagonist) + 0.205(Acetylcholine antagonist) -0.461(Microtubule stabilization) -0.644(Indanol dehydrogenase inhibitor) + 0.321(L-ascorbate peroxidase inhibitor) + 0.353(Headache) + 0.804(S-adenosyl-L-methionine decarboxylase inhibitor) -0.07(Ulcer. gastric) -0.277(Malaise) -14.9(Volume^2) -0.769(Lysophosphatidic acid 1 receptor antagonist) -0.253(Tyrosine-protein kinase TXK inhibitor) + 0.11(NumPositive) -0.797(Melatonin 1a antagonist) -0.5(Bradykinin antagonist) -0.441(3-Dehydroquinate synthase inhibitor) + 0.344(Prolyl aminopeptidase inhibitor) -0.22(Interleukin 1b antagonist) -0.193(Glycine receptor agonist) -0.265(Phosphodiesterase II inhibitor) -0.503(Histamine agonist) + 0.243(Pantetheine-phosphate adenylyltransferase inhibitor) + 0.483(Inotropic) + 0.179(Cachexia treatment) -0.289(Candidapepsin inhibitor) + 1.09(Phospholipase A2 inhibitor) + 0.338(Glyceraldehyde-3-phosphate dehydrogenase inhibitor) -0.266(Hirsutism treatment) + 0.687(MMP2 expression inhibitor) + 0.294(Elastase 3B inhibitor) -0.489(Potassium channel Kv4.3 blocker) + 0.379(Cyclin-dependent kinase 7 inhibitor) + 0.57(Adenylate cyclase V inhibitor) -0.326(Antidiuretic hormone agonist) -0.481(Lipid peroxidase inhibitor) -0.344(Proline racemase inhibitor) + 0.204(Protein kinase C mu inhibitor) + 1.63(2-(acetamidomethylene)succinate hydrolase inhibitor) + 1.1(SUMO-conjugating enzyme UBC9 inhibitor) + 1.36(Antineoplastic (insulinoma)) -0.3(Purinergic P2Y antagonist) + 7.23(Volume) + 1.01(DNA ligase (ATP) inhibitor) -1.01(Amidophosphoribosyltransferase inhibitor) + 0.861(GABA B receptor antagonist) -0.263(24-sterol C-methyltransferase inhibitor) -0.215(Acylaminoacyl-peptidase inhibitor) + 0.187(Carcinogenic. rat. male. lung) + 0.29(Proto-oncogene tyrosine-protein kinase Fgr inhibitor) + 0.352(Sentrin-specific protease 6 inhibitor) -1.24(Cyanate hydratase inhibitor) -0.194(BTG1 expression enhancer) + 0.312(Beta glucosidase inhibitor) -0.199(I kappa B kinase 1 inhibitor) + 0.267(Growth hormone releasing factor agonist) -0.128(Cyclin-dependent kinase 5 inhibitor) -0.365(Renin inhibitor) -0.287(ASAH1 expression enhancer) -0.29(Cyclin D3 inhibitor) + 0.194(Respiratory failure) -0.582(Prolyl endopeptidase inhibitor) + 0.514(Anticataract) -0.36(Pyruvate dehydrogenase kinase 1 inhibitor) -0.371(CYP3A4 inducer) + 0.301(Antihelmintic (Nematodes)) + 0.219(Ca2+/calmodulin-dependent kinase II inhibitor) + 0.115(Antineoplastic) -0.636(Endopeptidase inhibitor) -0.165(Inflammation) + 0.136(Antialcoholic) + 0.108(MW) + 0.543(Chitinase inhibitor) + 0.303(Bone formation stimulant) -1.05(SUMO-activating enzyme subunit 2 inhibitor) + 0.71(Glycosoaminoglycans antagonist) -0.811(Neuropathy treatment) -0.206(Protein-tyrosine phosphatase 1B inhibitor) -0.421(Aryl-alcohol dehydrogenase inhibitor) + 0.648(Antipruritic. non-allergic) -0.248(Gastroesophageal reflux disease treatment) -0.187(Vesicle monoamine transporter inhibitor) + 0.464(Protein-tyrosine phosphatase LC-PTP inhibitor) -0.843(Aldehyde dehydrogenase 1A2 inhibitor) + 0.144(Skin irritative effect) + 0.13(Ribosomal protein S6 kinase. 70-kDa inhibitor) -0.369(Fatty acid oxidation inhibitor) + 0.366(CNS active muscle relaxant) + 0.502(Adenosine deaminase inhibitor) -0.507(Prostaglandin E2 antagonist) + 0.301(Glutamate (mGluR group III) agonist) + 0.459(Histone deacetylase class IIb inhibitor) + 0.282(Substance P antagonist) -0.389(Heat shock protein 90 beta antagonist) + 0.273(ABCB1 expression enhancer) + 0.671(Tyrosine phenol-lyase inhibitor) -0.305(Glycosylceramidase inhibitor) -0.588(Antineoplastic antimetabolite) -0.552(Agaritine gamma-glutamyltransferase inhibitor) -0.209(Prostaglandin F2 alpha antagonist) + 0.172(Prostaglandin E2 agonist) -0.336(MAP kinase 12 inhibitor) -0.249(Integrin beta3 antagonist) + 0.428(Ulceration) + 0.237(Antidepressant) -0.309(Alopecia (hair loss)) -0.254(E2F1 expression enhancer) + 0.139(Antibiotic Carbacephem-like) + 0.38(Peroxisome proliferator-activated receptor gamma antagonist) + 0.58(Phosphoenolpyruvate carboxykinase (ATP) inhibitor) + 5.61(Length^3) + 0.892(Tetracycline antiport transporter antagonist) + 0.437(NMDA receptor subunit 3A antagonist) -0.504(VDR expression enhancer) -1.06(Kainate receptor agonist) + 0.599(HCV NS3/NS4A protease inhibitor) + 0.977(Prostaglandin agonist) + 0.303(Fibrinogen receptor antagonist) -0.568(MDM2 inhibitor) -0.893(Anabolic) -0.217(Plasminogen activator inhibitor) -0.182(Allergic contact dermatitis) -0.289(Glucagon receptor antagonist) -0.188(Ribosomal protein S6 kinase alpha 2 inhibitor) + 0.414(ICAM 1 antagonist) -0.236(Calcium-dependent phospholipase A2 inhibitor) + 0.272(Phosphodiesterase 6G inhibitor) + 0.724(Transcortin receptor antagonist) -0.639(5-Alpha-reductase 1 inhibitor) + 0.203(Toxic) + 0.223(Janus tyrosine kinase 1 inhibitor) + 0.414(UGT2B4 substrate) -0.58(CC chemokine receptor agonist) + 0.295(Cardiodepressant) -0.645(Beta-N-acetylhexosaminidase inhibitor) -0.746(Excitatory amino acid transporter 3 inhibitor) -0.119(TRPA1 antagonist) -0.418(Guanylate cyclase inhibitor) + 0.714(Ether-a-go-go potassium channel blocker) + 0.197(Weakness) + 0.224(Gastrointestinal disorders treatment) + 0.654(CYP4B1 substrate) + 0.116(Complement factor 1 inhibitor) -0.457(Vitamin) + 0.165(Integrin alphaVbeta6 antagonist) -0.608(Nicotinic receptor delta subunit antagonist) -0.143(MAP kinase 7 inhibitor) -0.137(Vascular endothelial growth factor 3 antagonist) -0.254(Sensitization) -0.145(Vasculitis treatment) + 0.186(Periodontitis treatment) + 0.111(Src kinase inhibitor) + 0.125(Estrogen-related receptor beta antagonist) -0.214(CDK2/cyclin E inhibitor) -0.168(Phosphodiesterase V inhibitor) -0.207(Superoxide dismutase inhibitor) -0.597(CYP24 substrate) -0.186(INHBE expression enhancer) -0.133(Polo-like kinase inhibitor) -0.165(Carcinogenic. mouse. male. harderian gland) + 0.307(Cyclooxygenase 1 inhibitor) + 0.0314(NumDonor) + 0.377(Follicle-stimulating hormone antagonist) -0.124(Bradykinin B1 receptor antagonist) + 0.215(Benzoate 4-monooxygenase inhibitor) + 0.297(HSPA1B expression enhancer) -0.121(HMG CoA reductase inhibitor) -0.382(Bcl-w inhibitor) + 0.37(Antihypotensive) -0.42(SMN2 expression enhancer) -0.365(Polyamine biosynthesis inhibitor) + 0.406(Peptide deformylase inhibitor) -0.395(Putrescine oxidase inhibitor) -0.333(Chemopreventive) + 0.131(Acaricide) -0.0203(NumNegative) + 0.355(NMDA receptor glycine site agonist) -0.126(Pyruvate dehydrogenase kinase inhibitor) + 0.125(Ribosomal protein S6 kinase 1. 70-kDa inhibitor) -0.231(Thrombin inhibitor) -0.0919(Carbonyl reductase [NADPH] 1 inhibitor) -0.0486(Dihydroorotase inhibitor) + 0.252(Peroxisome proliferator-activated receptor alpha agonist) + 0.241(Acetyl-CoA carboxylase 2 inhibitor) + 0.0823(MAP kinase kinase kinase inhibitor) -0.0678(Guanylate cyclase 1 stimulant) + 0.0767(ErbB-4 antagonist) + 0.23(Kallikrein 3 inhibitor) + 0.0637(Dual specificity phosphatase 3 inhibitor) -0.188(UDP-N-acetylglucosamine 1-carboxyvinyltransferase inhibitor) -0.162(Antiviral (Herpes)) -0.21(WARS expression enhancer) -0.0665(Integrin alpha2 antagonist) + 0.184(Corticotropin releasing factor 1 receptor antagonist) -0.219(Neutrophil fMLF receptor antagonist) -0.0752(Lysophosphatidic acid 3 receptor antagonist) -0.0557(Elongation of very long chain fatty acids protein 3 inhibitor) -0.0575(Epstein-Barr nuclear antigen 1 inhibitor) + 0.0702(Plasmepsin II inhibitor) -0.15(SKP2 expression inhibitor) -0.176(Heat shock protein 90 antagonist) -0.193(Andropause treatment) + 0.0636(Estradiol 17 beta dehydrogenase stimulant) + 0.0424(SMAD3 inhibitor) -0.255(Glyceraldehyde-3-phosphate dehydrogenase (NADP+) inhibitor) -0.0654(Chemokine receptor antagonist) + 0.0723(Apraxia) -0.137(L-amino-acid oxidase inhibitor) + 0.182(1-Pyrroline-5-carboxylate dehydrogenase inhibitor) + 0.13(GST M substrate) + 0.0598(CDC7 inhibitor) + 0.0585(Vision disturbance) -0.0568(CDC25 phosphatase inhibitor) -0.067(Amino acid-polyamine-organocation (APC) transporter antagonist) -0.133(Hyperparathyroidism treatment) -0.0325(Antiischemic) + 0.0478(Plasma kallikrein inhibitor) + 0.0377(Urologic disorders treatment) -0.0557(Gelatinase inhibitor) -0.129(Laxative) + 0.125(Secretase beta inhibitor) + 0.211(Alpha glucosidase inhibitor) + 0.0491(3 Beta-hydroxy-delta 5-steroid dehydrogenase inhibitor) + 0.0452(Neurotoxic) -0.0626(Glycogen synthase kinase-3 alpha inhibitor) -0.121(RELA expression inhibitor) + 0.0469(Ca2+/calmodulin-dependent kinase IV inhibitor) + 0.0417(11-Beta-hydroxysteroid dehydrogenase 2 inhibitor) + 0.142(Shikimate kinase inhibitor) -0.07(CYP2 substrate) + 0.126(Adenosine A2b receptor antagonist) + 0.0845(Anesthetic local) + 0.0397(Protein kinase C-related protein kinase 2 inhibitor) -0.0594(Vasodilator. coronary) + 0.0675(APOBEC-3G inhibitor) + 0.082(CDK1 expression enhancer) + 0.0324(Fatty acid binding protein muscle inhibitor) -0.113(Gamma-glutamyl hydrolase inhibitor) -0.0329(Prolactin release inhibitor) + 0.112(Cellulose 1.4-beta-cellobiosidase inhibitor) + 0.0931(KiSS-1 receptor antagonist) + 0.0765(Histamine H1 receptor antagonist) -0.0529(Alcohol dehydrogenase inhibitor) -0.0309(Teratogen) -0.0447(Withdrawal) + 0.0509(Cytidine deaminase inhibitor) -0.0264(ABCG1 expression enhancer) -0.0256(Acidosis) -0.0756(Rotamase (FKBP14) inhibitor) + 0.0179(EphA2 antagonist) -0.0432(5 Hydroxytryptamine 2B antagonist) + 0.0174(Signal transduction pathways inhibitor) + 0.0147(TRPM8 blocker) + 0.0276(Dipeptidyl peptidase inhibitor) + 0.0548(Nicotinate-nucleotide diphosphorylase (carboxylating) inhibitor) + 0.00943(Vanilloid 1 antagonist) -0.0229(CXC chemokine 4 receptor antagonist) -0.0433(mRNA (guanine-N7-)-methyltransferase inhibitor) + 0.0107(Depression) -0.0209(Pregnane X receptor agonist) + 0.00803(Calcium release-activated channel blocker) + 0.021(Nicotinic receptor beta3 subunit antagonist) -0.00588(Cyclooxygenase 3 inhibitor) -0.00396(RNA directed DNA polymerase inhibitor) + 0.0145(PRL phosphatase inhibitor) -0.0101(Corticotropin releasing factor antagonist) -0.00909(Dipeptidyl peptidase I inhibitor) -0.00974(Dopamine uptake inhibitor) + 0.00451(Calcium channel (voltage-sensitive) blocker) + 0.00219(NADH oxidase inhibitor) + 0.00287(Glucose-6-phosphate dehydrogenase-6-phosphogluconolactonase inhibitor) + 0.00331(Alpha 1 adrenoreceptor antagonist) + 0.0011(ZAP-70 protein tyrosine kinase inhibitor) + 0.000145(Enoyl-[acyl-carrier-protein] reductase (NADH) inhibitor) + 4.98

Model 18

-0.368((R)-3-amino-2-methylpropionate-pyruvate transaminase inhibitor) + 0.113(Miotic) + 0.184(NumAromAtoms) -0.25(Thrombocytopenia) -0.106(Autotaxin inhibitor) + 0.0355(Mydriatic) + 0.322(Histone deacetylase 6 inhibitor) -0.0377(Aggrecanase inhibitor) -1.07(Aspartate transaminase inhibitor) -0.0785(NumAcceptor) -0.514(Beta lactamase inhibitor) + 0.479(Corticosteroid-like) -1.9(Ribulose-bisphosphate carboxylase inhibitor) + 3.31(Length) + 2.61(Sialidase 1 inhibitor) + 0.991(Sulfinoalanine decarboxylase inhibitor) + 0.295(Arylsulfatase inhibitor) -1.02(Hyperthermic) + 0.516(Retinoid X gamma receptor antagonist) -0.0541(Carnitine palmitoyltransferase inhibitor) + 0.538(Ototoxicity) + 0.734(Tremor) -0.228(Angiotensin antagonist) + 0.536(NOS2 expression enhancer) -0.307(Glycine receptor agonist) + 0.472(Erythema) + 0.439(Proline transporter inhibitor) + 0.812(DNA methyltransferase I inhibitor) -0.32(Acetylserotonin O-methyltransferase inhibitor) + 0.84(TRPV2 blocker) -0.325(T-cell protein-tyrosine phosphatase inhibitor) -0.818(Glutathione S-transferase substrate) -1.54(Protein phosphatase 2B inhibitor) + 0.111(Lipophilicity^2) -0.678(Photinus-luciferin 4-monooxygenase (ATP-hydrolysing) inhibitor) + 0.206(Urinary incontinence treatment) -0.494(Phosphodiesterase 1C inhibitor) -0.292(GP IIb/IIIa receptor antagonist) + 0.318(Estrogen-related receptor beta antagonist) -0.469(Pyruvate dehydrogenase kinase 1 inhibitor) + 2.43(Carbonic anhydrase XIV inhibitor) + 0.481(CYP1A1 expression enhancer) + 0.24(Granulocyte stimulating factor agonist) -0.603(Aldose reductase 2 inhibitor) -0.509(Phosphodiesterase VIII inhibitor) + 0.192(Transglutaminase 2 inhibitor) -0.281(Restenosis treatment) -0.338(Rotamase (FKBP12) inhibitor) -0.89(Cholesterol antagonist) + 0.48(Ceramide glucosyltransferase inhibitor) -0.341(CDK2/cyclin E inhibitor) + 0.766(Ulceration) -0.156(Antibiotic Macrolide-like) + 0.659(Chitinase inhibitor) + 0.472(Hypolipemic) + 0.991(Nicotinic receptor alpha6 subunit antagonist) + 0.957(Phosphoenolpyruvate carboxykinase (ATP) inhibitor) + 0.409(T cell inhibitor) -0.235(Akathisia) -1.55(5-Formyltetrahydrofolate cyclo-ligase inhibitor) + 13.2(Lipophilicity) -0.421(Potassium channel intermediate-conductance Ca-activated 4 blocker) + 0.604(Ribosomal protein S6 kinase. 70-kDa inhibitor) + 0.0683(Antibiotic Oxacephem-like) + 0.489(Paranoia) -0.301(Myocardial ischemia treatment) -0.906(MAO B inhibitor) -0.86(Potassium channel Kv4.3 blocker) + 14.5(Volume) -0.362(CYP1A2 substrate) + 0.254(Trypsin II inhibitor) + 0.983(SUMO-conjugating enzyme UBC9 inhibitor) -0.0442(RNA directed DNA polymerase inhibitor) -0.23(Protein kinase (CK2) alpha inhibitor) + 0.624(Phosphatidylcholine-sterol O-acyltransferase inhibitor) -0.834(Nicotinic receptor gamma subunit antagonist) + 1.04(Penicillopepsin inhibitor) + 0.274(Protein kinase C nu inhibitor) + 0.339(GABA receptor agonist) + 0.367(Protocollagen prolyl hydroxylase inhibitor) -2.4(Carbonic anhydrase VI inhibitor) -0.322(Cytochrome P450 inhibitor) -0.563(Ribosomal protein S6 kinase alpha 1 inhibitor) + 0.249(CYP2D substrate) -0.584(Excitatory amino acid transporter 3 inhibitor) + 0.392(CYP2C19 inhibitor) + 0.237(5 Hydroxytryptamine 5 antagonist) -0.396(KPNA2 expression inhibitor) -0.354(Matrix metalloproteinase (membrane-type) inhibitor) + 1.27(2-(acetamidomethylene)succinate hydrolase inhibitor) + 0.985(Adenosine A1 receptor agonist enhancer) -0.238(Acute neurologic disorders treatment) -0.549(Antidepressant. Imipramin-like) -0.758(Anesthetic inhalation) + 0.335(Growth hormone release promoting) + 0.28(Enoyl-[acyl-carrier-protein] reductase (NADH) inhibitor) -0.151(Histone deacetylase 9 inhibitor) -0.292(Phosphatidylinositol 3-kinase alpha inhibitor) + 0.0262(Antineoplastic (pancreatic cancer)) + 0.203(Inositol 1.4.5-triphosphate receptor 1 antagonist) + 0.466(Squalene epoxidase inhibitor) -0.62(Fatty liver) + 0.3(Psychostimulant) -0.479(Serine/threonine-protein kinase WEE1 inhibitor) -0.53(Capillary fragility treatment) + 0.185(Hepatic disorders treatment) -0.242(Steroid 17-alpha-hydroxylase/17.20 lyase inhibitor) -0.208(Keratoses actinic (solar) treatment) + 0.27(Postmenopausal disorders treatment) -12.6(Volume^2) -0.137(Orexin receptor 2 antagonist) + 0.428(Dyslipidemia) -0.155(Dihydroorotase inhibitor) + 0.24(Rho-associated kinase inhibitor) -0.199(Non-steroidal antiinflammatory agent) -0.174(Acetylspermidine deacetylase inhibitor) -0.425(Hyperkinesia) -0.336(Ribosomal protein S6 kinase alpha 5 inhibitor) -0.3(Renin inhibitor) + 0.39(Serine carboxypeptidase inhibitor) + 0.335(Anesthetic general) -0.415(Transforming growth factor beta antagonist) + 0.181(Phosphodiesterase 6C inhibitor) -0.39(Antiperistaltic) -0.25(Histone deacetylase 1B inhibitor) -0.837(Melatonin 2 agonist) -0.32(Antituberculosic) + 0.424(Antiprotozoal (Plasmodium)) + 0.442(Procollagen-lysine 5-dioxygenase inhibitor) + 1.15(Anticholelithogenic) + 0.13(Death-associated protein kinase inhibitor) + 0.309(Cathepsin B inhibitor) + 0.219(Elastase 3B inhibitor) + 0.214(Diplopia) + 0.315(Weight gain) + 0.615(Beta-D-fucosidase inhibitor) -0.141(Carcinogenic. rat) + 0.448(Calcium channel L-type blocker) + 0.379(Ovulation inhibitor) + 0.177(CYP4F2 inhibitor) -0.22(Polyadenylate-binding protein 1 inhibitor) -0.232(Glycosuria) -0.402(EDN1 expression enhancer) -0.322(Complement C3a chemotactic receptor antagonist) + 0.152(Transcription factor STAT1 inhibitor) + 0.668(Somatostatin 4 antagonist) -1.09(Lysophosphatidic acid receptor antagonist) + 0.12(NumPositive) + 0.687(Tetracycline antiport transporter antagonist) + 0.568(Ethanolaminephosphotransferase inhibitor) -0.56(Sorbitol dehydrogenase inhibitor) + 0.221(Phosphate transporter inhibitor) + 0.691(Phospholipase A2 inhibitor) + 0.541(Nuclear factor of activated T-cells cytoplasmic 2 inhibitor) + 0.708(Progesterone receptor A antagonist) + 0.264(Ca2+/calmodulin-dependent kinase II delta inhibitor) + 0.343(Myristoyl transferase 1 inhibitor) + 0.266(Alpha adrenoreceptor antagonist) -0.191(Fatty acid elongase inhibitor) -0.17(Prostate disorders treatment) -0.518(Heat shock protein 90 antagonist) -0.276(Immunomodulator) + 0.81(Phosphatidylinositol 4-kinase inhibitor) + 0.269(Prolyl aminopeptidase inhibitor) + 0.438(CYP2G1 substrate) -0.653(Oxytocin agonist) -0.942(tRNA methyltransferase inhibitor) -0.484(ICAM1 expression inhibitor) -0.4(Acid phosphatase inhibitor) -0.275(MT1G expression enhancer) + 0.255(Carcinogenic. rat. male. hematopoietic system) + 0.141(Xanthine-like) + 0.126(Antineoplastic (non-small cell lung cancer)) + 0.282(Rho-associated kinase I inhibitor) -0.302(Aryl-acylamidase inhibitor) -0.46(Amylo-alpha-1.6-glucosidase inhibitor) + 0.306(SLC2A3 expression inhibitor) -1.28(CYP24 substrate) -0.68(Glyoxylate reductase (NADP+) inhibitor) + 0.0844(Troponin I. cardiac muscle inhibitor) -0.296(Antibacterial. ophthalmic) + 0.0388(NumHal) + 0.182(Integrin alphaVbeta1 antagonist) + 0.176(Bombesin 3 receptor agonist) -0.479(Hypoxia inducible factor 1 alpha inhibitor) -0.824(Rhodopsin kinase inhibitor) -0.196(Growth hormone release inhibitor) -0.198(Gastrointestinal hemorrhage) -0.293(Factor Xa inhibitor) + 0.255(Histamine release stimulant) + 0.141(Plasmepsin I inhibitor) -0.172(Antidiuretic hormone agonist) -0.45(Antineoplastic antimetabolite) + 0.169(Interleukin 5 antagonist) + 0.59(Polypeptide N-acetylgalactosaminyltransferase inhibitor) -0.284(FMO3 substrate) + 0.158(Ca2+/calmodulin-dependent kinase I inhibitor) + 0.563(NAD(P)+ transhydrogenase (B-specific) inhibitor) -0.175(Premenstrual syndrome treatment) + 0.33(Intestinal alkaline phosphatase inhibitor) + 0.404(Stromelysin 2 inhibitor) + 0.193(CDKN1A expression enhancer) -0.161(Melatonin 1 agonist) -0.148(Antihemorrhagic) -0.106(Antiulcerative) -0.567(Glutamate (mGluR6) antagonist) + 0.165(Excitatory amino acid transporter 1 inhibitor) + 0.263(GABA C receptor rho-1 antagonist) -0.378(Cyclooxygenase inhibitor) + 0.25(Metalloproteinase-2 inhibitor) + 0.447(GABA A receptor agonist) -0.773(Histone deacetylase class IV inhibitor) -0.216(5 Hydroxytryptamine release inhibitor) -0.238(Beta-carotene 15.15'-monooxygenase inhibitor) -0.369(Fibromyalgia syndrome treatment) + 0.315(IFIT1 expression enhancer) + 0.151(Ribosomal protein S6 kinase 2 inhibitor) -0.205(Carcinogenic. mouse) -0.276(Cystic fibrosis treatment) + 0.767(Alpha-N-acetylneuraminate alpha-2.8-sialyltransferase inhibitor) + 0.151(Interleukin 1 antagonist) + 0.193(Respiratory analeptic) + 0.126(MAP3K9 inhibitor) -0.149(Protein kinase C zeta inhibitor) -0.3(Matrix metalloproteinase 3 (membrane-type) inhibitor) -0.152(L lactate dehydrogenase C inhibitor) + 0.142(Dopamine D2A antagonist) -0.133(Sirtuin 1 inhibitor) + 0.143(Acaricide) -0.0903(CYP3A4 inhibitor) -0.119([phosphorylase] phosphatase inhibitor) -0.193(Kruppel-like factor 5 inhibitor) -0.473(Protein Wnt-2 inhibitor) -0.143(Estrogen antagonist) + 0.0818(HIF1A expression inhibitor) -0.707(AMP nucleosidase inhibitor) + 0.445(Aminopeptidase N inhibitor) -0.127(Phosphorylase kinase gamma subunit 1 inhibitor) -0.149(MAP kinase 12 inhibitor) + 0.122(Carcinogenic. rat. male. kidney) + 0.056(Antineoplastic (bone cancer)) + 0.399(1-Pyrroline-5-carboxylate dehydrogenase inhibitor) -0.0901(Cyclin H inhibitor) -0.277(Prolyl endopeptidase inhibitor) + 0.213(HSPA1A expression enhancer) + 0.303(HCV NS3/NS4A protease inhibitor) -0.105(EGFR expression inhibitor) -0.154(Parkinsonism) + 0.0823(Neurotoxic) + 0.337(Peroxisome proliferator-activated receptor delta agonist) -0.148(Platelet activating factor alpha antagonist) + 0.359(Ether-a-go-go potassium channel 1 blocker) + 0.0754(Src kinase inhibitor) -0.109(Nitric oxide antagonist) + 3.5(Length^3) -0.537(Cellulose synthase (UDP-forming) inhibitor) -0.203(VDR expression enhancer) -0.109(Bcl-xL inhibitor) + 0.193(Cytochrome P450 stimulant) + 0.0768(Dual specificity phosphatase inhibitor) + 0.1(Thyroid hormone alpha antagonist) -0.26(Nicotinic alpha7 receptor agonist) + 0.219(Morphine 6-dehydrogenase inhibitor) -0.237(CC chemokine 8 receptor antagonist) + 0.248(5 Hydroxytryptamine 3 agonist) + 0.214(Cytokine modulator) + 0.572(N-acylneuraminate cytidylyltransferase inhibitor) -0.185(Neuropeptide Y antagonist) -0.21(Vascular adhesion protein 1 inhibitor) + 0.121(Antineurotic) + 0.0791(Trypsin III inhibitor) -0.156(SQLE expression inhibitor) + 0.134(Carcinogenic. rat. male. all tumor bearing animals) -0.231(EFNB2 expression inhibitor) -0.294(Atrolysin C inhibitor) -0.197(Xanthine oxidase inhibitor) + 0.0853(RET inhibitor) + 0.0717(Sleep disturbance) + 0.139(Yawning) -0.0805(24-sterol C-methyltransferase inhibitor) -0.125(Sneezing) + 0.0937(Nephritis) -0.0908(Serine-type D-Ala-D-Ala carboxypeptidase inhibitor) -0.109(Panic) + 0.138(Growth factor agonist) -0.413(Dopamine D2B antagonist) + 0.0975(Troponin T. cardiac muscle inhibitor) -0.0972(Cyclin-dependent kinase 1 inhibitor) + 0.139(Urologic disorders treatment) + 0.0785(ADAM inhibitor) + 0.36(Postcoital contraceptive) -0.389(Dolichyl-phosphate beta-D-mannosyltransferase inhibitor) + 0.0604(Sodium/glucose cotransporter inhibitor) + 0.0737(Opioid kappa 1 receptor antagonist) -0.0519(Antineoplastic (glioblastoma multiforme)) + 0.244(Heat shock protein 70 antagonist) -0.194(Prostaglandin D2 antagonist) + 0.059(Cachexia treatment) -0.092(Pruritus) -0.0638(PI4-kinase beta inhibitor) -0.123(PPARG expression enhancer) + 0.0598(Liver X receptor alpha agonist) -0.0794(Opioid mu receptor antagonist) -0.154(Trans-1.2-dihydrobenzene-1.2-diol dehydrogenase inhibitor) + 0.142(Galactose oxidase inhibitor) -0.128(Dopamine agonist) + 0.0762(Lichenoid eruption) + 0.165(Geranyltranstransferase inhibitor) + 0.135(RARB expression enhancer) + 0.151(LGALS8 expression enhancer) + 0.0584(Adenylate cyclase VIII inhibitor) -0.111(Analgesic stimulant) + 0.0535(Periodontitis treatment) + 0.0463(Mcl-1 antagonist) -0.0462(Methionyl aminopeptidase 2 inhibitor) + 0.04(Dihydrofolate reductase (Toxoplasma gondii) inhibitor) -0.0434(CYP11A1 inhibitor) -0.0353(Follicle-stimulating hormone agonist) + 0.0353(Protein-tyrosine phosphatase 1C inhibitor) + 0.0491(Phosphatidylinositol 3-kinase beta inhibitor) -0.0447(Steroid DELTA-isomerase inhibitor) + 0.108(Histone deacetylase inhibitor) -0.0243(Antiviral (Rhinovirus)) -0.0527(Hypercholesterolemic) + 0.0418(Cholestasis) -0.000141(Lipophilicity^3) -0.0267(Preterm labor treatment) -0.0324(Hyponatremia) + 0.0316(Raf kinase inhibitor) + 0.0369(Matrix metalloproteinase 1 inhibitor) -0.0291(Nonstructural protein 1 (Influenza A) inhibitor) -0.0251(Interleukin 1b antagonist) -0.003(NumNegative) -0.0506(Acetylcholine nicotinic agonist) -0.0307(Aryl-alcohol dehydrogenase inhibitor) + 0.0168(Attention deficit/hyperactivity disorder treatment) -0.0255(INHBE expression enhancer) + 0.0362(Thromboxane antagonist) + 0.0393(5 Hydroxytryptamine 3A antagonist) + 0.00938(Antidiabetic (type 2)) + 0.0102(Hypothermic) -0.02(CYP2B2 substrate) + 0.0289(PRL phosphatase inhibitor) -0.0271(Glycerol-3-phosphate O-acyltransferase inhibitor) + 0.0186(Cathepsin G inhibitor) + 0.00481(Antiglaucomic) + 0.0118(Focal adhesion kinase inhibitor) + 0.00658(Carbonic anhydrase XII inhibitor) + 0.00846(Carcinogenic. rat. male. adrenal gland) + 0.00546(Integrin alpha1beta1 antagonist) + 0.0148(CCND1 expression enhancer) -0.0125(HSD17B1 expression enhancer) + 0.0119(Insulin sensitizer) + 0.00477(Psychomotor impairment) -0.0088(Glucosylceramidase inhibitor) -0.00499(I(Ks) voltage-gated potassium channel blocker) -0.00448(Kynureninase inhibitor) + 6.15

Model 19

+ 0.131(Thiopurine S-methyltransferase inhibitor) + 0.532(CYP2D substrate) -0.218(Thrombocytopenia) + 0.192(NumAromAtoms) -0.445(Endothelin receptor antagonist) + 0.341(Antiseborrheic) + 0.028(Carnitine palmitoyltransferase inhibitor) -0.298(Glycine receptor agonist) + 0.84(IL4 expression enhancer) -1.74(Aspartate transaminase inhibitor) -0.74(DNA repair enzyme inhibitor) -0.338(HCV NS5B polymerase inhibitor) + 1.61(Length) -0.427(CDK/Cyclin complex inhibitor) + 0.328(HCV NS5A inhibitor) + 0.305(Ocular toxicity) + 0.746(Fructose-1.6-bisphosphatase 2 inhibitor) -0.999(SUMO-activating enzyme subunit 2 inhibitor) -0.85(Hyperthermic) + 0.929(P3 purinoceptor-like protein antagonist) + 0.0812(Tumour necrosis factor antagonist) + 0.0418(Insulin like growth factor 1 antagonist) -0.0743(NumAcceptor) -1.34(Glycogen debranching enzyme inhibitor) + 1.1(Methionyl aminopeptidase inhibitor) -1.71(N-formylglutamate deformylase inhibitor) -0.695(CYP2C substrate) -1.12(Indanol dehydrogenase inhibitor) + 0.951(S-adenosyl-L-methionine decarboxylase inhibitor) + 0.409(Gynecological disorders treatment) + 0.0918(Lipophilicity^2) -0.122(Platelet antagonist) + 0.18(Imidazoline receptor antagonist) + 0.245(Immunosuppressant) -0.555(Cytostatic) -0.216(Neurotrophic factor) + 1.12((R)-aminopropanol dehydrogenase inhibitor) -1.42(Vascular adhesion protein 1 inhibitor) -1.09(Potassium channel Kv4.3 blocker) + 0.149(G-protein coupled bile acid receptor 1 antagonist) + 0.546(Anemia) + 0.955(Alpha-L-fucosidase inhibitor) + 1.03(Colony stimulating factor agonist) -0.869(3-Dehydroquinate synthase inhibitor) -0.295(Epstein-Barr nuclear antigen 1 inhibitor) + 0.594(Cyclin D1 inhibitor) + 0.256(Chronic obstructive pulmonary disease treatment) -0.282(CYP2E substrate) + 0.731(MYC expression enhancer) + 0.461(Carbonic anhydrase X inhibitor) -1.28(Diacylglycerol kinase inhibitor) + 0.309(Glyceryl-ether monooxygenase inhibitor) -0.68(Premature ejaculation treatment) -0.222(Carcinogenic. rat. female) -0.172(Trans-octaprenyltranstransferase inhibitor) -0.7(Antifibrinolytic) + 0.275(Alanine racemase inhibitor) -0.416(EDN1 expression inhibitor) -0.622(Pyruvate dehydrogenase kinase 1 inhibitor) -0.27(Antineoplastic (renal cancer)) + 0.482(Cyclin-dependent kinase 7 inhibitor) + 0.559(Antiviral (CMV)) + 0.269(Sentrin-specific protease 8 inhibitor) -0.371(GPX2 expression enhancer) -0.296(Cyclin T1 inhibitor) -0.407(Immunomodulator) -0.516(Calpain small subunit 1 inhibitor) -0.589(Cyclin D3 inhibitor) -0.269(Acute neurologic disorders treatment) + 12.2(Lipophilicity) + 0.314(ATP-dependent RNA helicase inhibitor) + 13.6(Volume) + 0.235(MAP-kinase-activated kinase 2 inhibitor) + 0.321(Fibroblast activation protein alpha inhibitor) + 0.37(Sweating) -0.424(Prostatic (benign) hyperplasia treatment) + 0.912(CYP27A substrate) + 0.733(Galactosylceramide sulfotransferase inhibitor) -0.298(Purinergic P2T antagonist) + 0.287(Antineoplastic (brain cancer)) -0.201(Embryotoxic) -0.148(Betaine-aldehyde dehydrogenase inhibitor) + 0.448(Cytosolic phospholipase A2 inhibitor) + 0.684(Diabetic neuropathy treatment) + 0.302(Antialcoholic) + 0.188(Substance P antagonist) -0.325(DHRS3 expression enhancer) + 0.66(GADD45B expression enhancer) + 1.02(3-Hydroxybutyrate dehydrogenase inhibitor) -0.194(Angiotensin antagonist) -0.478(Kallikrein 1 inhibitor) + 0.356(CYP1A1 substrate) + 0.589(Estrogen beta receptor agonist) -0.334(Phosphatidylinositol 3-kinase alpha inhibitor) + 0.598(CYP2D6 inhibitor) + 0.261(Integrin antagonist) -0.57(PPARG expression enhancer) + 0.208(Antiviral (Influenza)) + 1.03(Chloride/bicarbonate exchanger inhibitor) + 0.387(HMGCS1 expression enhancer) + 0.692(Alanine transaminase inhibitor) + 0.0954(NumPositive) + 1.01(Pyruvate dehydrogenase stimulant) -0.307(MAO A inhibitor) + 0.221(AMP-activated protein kinase inhibitor) -0.312(TGF beta receptor type I kinase inhibitor) -0.172(Peptidyl-prolyl cis-trans isomerase FKBP4 inhibitor) + 0.304(Behavioral disturbance) -0.196(IL12B expression inhibitor) -0.152(Antiallergic) -0.218(ESR1 expression inhibitor) -1.13(Low molecular weight phosphotyrosine protein phosphatase inhibitor) -0.614(CF transmembrane conductance regulator antagonist) + 0.351(Carcinogenic. rat. male. lung) -0.407(Sphingosine 1-phosphate receptor 1 antagonist) + 0.458(Dyslipidemia) -0.256(Retinoic acid beta receptor agonist) -0.202(Fatty acid elongase inhibitor) + 0.469(Calcium channel activator) -0.355(Cholesterol absorption inhibitor) + 0.366(Plasminogen activator inhibitor antagonist) -0.863(Histone-lysine N-methyltransferase. H3 lysine-9 specific 3 inhibitor) -0.108(L lactate dehydrogenase C inhibitor) + 0.872(Membrane dipeptidase inhibitor) + 0.228(Phosphodiesterase 6C inhibitor) -0.319(SLC7A5 expression enhancer) -10.5(Volume^2) + 0.331(Antifungal) + 0.191(Interleukin 1 antagonist) + 0.535(Adenosine deaminase inhibitor) -0.645(2-Oxoaldehyde dehydrogenase (NAD+) inhibitor) + 0.221(Prolyl aminopeptidase inhibitor) -0.56(Hydroxyacylglutathione hydrolase inhibitor) + 0.215(Elastase 2B inhibitor) -0.311(Aryl-acylamidase inhibitor) -0.908(CYP24 substrate) + 0.141(Antineoplastic (endocrine cancer)) -0.711(Glutamate (mGluR6) antagonist) -0.325(Estrogen receptor alpha antagonist) + 0.46(NAD(P)+ transhydrogenase (AB-specific) inhibitor) + 0.189(Bradycardic) + 0.21(Alpha galactosidase inhibitor) + 0.353(Arylamine N-acetyltransferase inhibitor) -0.852(mRNA (nucleoside-2'-O-)-methyltransferase inhibitor) + 0.156(Ribosomal protein S6 kinase inhibitor) -0.376(Histone acetyltransferase inhibitor) + 5(Length^3) + 0.238(Cytosolic phospholipase A2 beta inhibitor) + 0.188(Prostaglandin E1 agonist) + 0.391(Carcinogenic. rat. female. urinary bladder) -0.202(Ribosomal protein S6 kinase alpha 2 inhibitor) + 0.164(Antineoplastic (bone cancer)) + 0.807(HCV NS3/NS4A protease inhibitor) -0.28(Nicotinamidase inhibitor) + 0.669(Prephenate dehydratase inhibitor) -0.506(Dipeptidyl peptidase I inhibitor) -0.41(Glutathione reductase inhibitor) + 0.253(Clk dual-specificity kinase inhibitor) + 0.733(Sodium/hydrogen exchanger 3 inhibitor) -0.124(NGFR expression enhancer) + 0.478(DUSP10 expression enhancer) -0.272(Sodium channel blocker) + 0.189(Membrane integrity antagonist) -0.546(ATM kinase inhibitor) + 0.579(2-Enoate reductase inhibitor) -0.205(Microtubule stabilization) -0.501(Histone deacetylase 11 inhibitor) + 0.182(Glucocorticoid antagonist) + 0.649(Factor XIIIa inhibitor) + 0.354(Ototoxicity) -0.262(Myasthenia Gravis) -0.713(Neuropathy treatment) -0.137(CYP2C10 substrate) + 0.765(AMP-activated protein kinase. gamma-1 subunit inhibitor) -0.302(UGT1A4 substrate) -0.171(HIV-2 pol protein inhibitor) + 0.561(CXC chemokine L1/GRO-alpha antagonist) -0.118(Cyclin H inhibitor) + 0.189(Signal transduction pathways inhibitor) -0.56(5'-Nucleotidase inhibitor) -0.268(Fatty liver) + 0.163(Antiprotozoal (Toxoplasma)) -0.585(Argininosuccinate lyase inhibitor) -0.535(Testosterone 17beta-dehydrogenase inhibitor) + 0.373(GABA C receptor antagonist) -0.149(CYP51 inhibitor) + 0.483(Phosphodiesterase VII inhibitor) -0.213(Eosinophilia) -0.151(HMG CoA reductase inhibitor) + 0.142(Antifungal (Candida)) -0.183(Vasopressin 1 agonist) + 0.944(Riboflavin synthase inhibitor) + 0.362(CAT expression inhibitor) -0.0966(GST P substrate) -0.232(Eukaryotic translation initiation factor 4 gamma 1 inhibitor) -0.431(UDP-3-O-acyl-N-acetylglucosamine deacetylase inhibitor) + 0.293(Membrane permeability enhancer) -0.167(Platelet growth factor antagonist) + 0.428(Antipruritic. non-allergic) + 0.564(UGT2B4 substrate) + 0.143(Alpha 2c adrenoreceptor agonist) -0.369(TOP2A expression inhibitor) -0.143(HIV attachment inhibitor) -0.172(Polo-like kinase-2 inhibitor) -0.24(EphB4 antagonist) + 0.155(Proto-oncogene tyrosine-protein kinase c-hck inhibitor) + 0.414(CDKN1C expression enhancer) -0.361(Endopeptidase inhibitor) -0.357(Alpha-L-rhamnosidase inhibitor) -0.124(Macrophage elastase inhibitor) -0.164(Antipyretic) -0.129(TEC kinase inhibitor) -0.374(Lactate 2-monooxygenase inhibitor) + 0.199(Janus tyrosine kinase 1 inhibitor) -0.143(Sigma 1 receptor agonist) + 0.355(Beta-D-fucosidase inhibitor) + 0.129(Trypsin III inhibitor) -0.224(Fibroblast growth factor 1 antagonist) -0.269(Inducible nitric oxide synthase inhibitor) -0.388(Sphingosine 1-phosphate receptor 3 antagonist) + 0.151(Bulimia treatment) + 0.155(Gastrointestinal disorders treatment) + 0.0715(Inflammatory Bowel disease treatment) -0.383(Anesthetic inhalation) -0.288(PIM1 expression enhancer) + 0.111(Phosphate transporter inhibitor) -0.391(Alpha 1 adrenoreceptor agonist) + 0.643(Asparagine-oxo-acid transaminase inhibitor) -0.128(Phosphodiesterase X inhibitor) + 0.321(Nuclear factor of activated T-cells cytoplasmic 2 inhibitor) -1(Beta-1.4-mannosyl-glycoprotein 4-beta-N-acetylglucosaminyltransferase inhibitor) -0.505(CDK4/cyclin D inhibitor) -0.398(UDP-glucuronate decarboxylase inhibitor) + 0.504(Formyl peptide receptor 1 antagonist) + 0.143(Vesicle monoamine transporter 2 inhibitor) -0.118(Dyspnea) -0.156(Opioid mu receptor antagonist) -0.25(Xanthine oxidase inhibitor) -0.131(2.3-Oxidosqualene-lanosterol cyclase inhibitor) + 0.093(FABP1 expression enhancer) + 0.0924(Opioid delta 1 receptor antagonist) -0.395(Glycogen phosphorylase. muscle form inhibitor) + 0.103(Tryptophan hydroxylase 1 inhibitor) -0.155(Protein phosphatase 2A inhibitor) + 0.457(2-(acetamidomethylene)succinate hydrolase inhibitor) -0.113(Histone deacetylase 1B inhibitor) -0.121(CC chemokine receptor antagonist) -0.121(5 Hydroxytryptamine 1F agonist) + 0.174(Sigma receptor agonist) -0.143(MAP kinase 12 inhibitor) + 0.0808(Thiol protease inhibitor) + 0.329(L-ascorbate peroxidase inhibitor) -0.381(Retinoid X alpha receptor antagonist) + 0.299(Thromboxane antagonist) + 0.108(Macrophage colony-stimulating factor 1 receptor antagonist) -0.137(Complement C3a chemotactic receptor antagonist) -0.106(Gastroesophageal reflux disease treatment) + 0.13(Sirtuin 2 inhibitor) -0.128(Hypomania) + 0.156(Cell wall biosynthesis inhibitor) + 0.156(5 Hydroxytryptamine agonist) -0.109(AXL receptor tyrosine kinase inhibitor) + 0.508(Uridine nucleosidase inhibitor) + 0.121(Prostaglandin EP12 antagonist) + 0.292(CYP11B1 inhibitor) + 0.0146(NumHal) + 0.305(CXC chemokine 1 receptor antagonist) -0.12(Antimycobacterial) -0.105(Calpain 2 inhibitor) + 0.259(L-iditol 2-dehydrogenase inhibitor) + 0.116(Analeptic) + 0.603(Imidazoline I2 receptor antagonist) + 0.085(Neuropeptide FF antagonist) + 0.0976(Psychomotor impairment) -0.271(Glucosyl transferase inhibitor) -0.144(Cerebral hemorrhage) + 0.164(Probable DNA dC->dU-editing enzyme APOBEC-3A inhibitor) -0.0752(Dry eye syndrome treatment) + 0.225(DOPA decarboxylase inhibitor) + 0.0694(Lipoxin receptor agonist) -0.129(Carcinogenic. rat. male. large intestine) -0.254(Histidine decarboxylase inhibitor) + 0.0793(Candidapepsin 2 inhibitor) + 0.225(Interleukin 1a antagonist) + 0.0621(Isoleucine-tRNA ligase inhibitor) + 0.0733(3 Beta-hydroxy-delta 5-steroid dehydrogenase inhibitor) -0.214(Myeloperoxidase inhibitor) + 0.0735(Cyanosis) -0.0742(Sleep disturbance) -0.0626(Peroxisome proliferator-activated receptor gamma agonist) -0.0104(NumNegative) + 0.0522(Protein 30S ribosomal subunit inhibitor) + 0.0583(Retinopathy treatment) -0.0572(Lassitude treatment) + 0.0668(Dopamine precursors) -0.249(Kexin inhibitor) -0.0402(Spasmolytic. urinary) -0.176(Free fatty acid receptor 1 agonist) + 0.339(Ribose-5-phosphate isomerase inhibitor) + 0.0387(Antibiotic Carbacephem-like) -0.0544(Glutamate (mGluR group I) agonist) -0.0516(ATPase (Mitochondrial F1F0) inhibitor) -0.14(Thromboxane synthase inhibitor) -0.073(Integrin beta3 antagonist) + 0.0371(Chloride channel blocker) + 0.279(Neuraminidase inhibitor) + 0.0536(Pain) -0.266(6-Phosphofructo-2-kinase inhibitor) + 0.0435(Histone deacetylase class IIb inhibitor) -0.0831(Cytokine production inhibitor) -0.0442(Cyclin-dependent kinase 5 inhibitor) -0.0564(Estrogen antagonist) -0.0691(Sialorrhea) -0.0871(MO15-related protein kinase Pfmrk inhibitor) + 0.129(CYP4A11 inhibitor) + 0.0416(Hyperglycemic) -0.0415(Renin inhibitor) + 0.0347(Vision blurring) -0.0477(Vesicle monoamine transporter inhibitor) + 0.119(Mannosyl-oligosaccharide 1.2-alpha-mannosidase inhibitor) + 0.125(K(ir) 6.1 channel blocker) + 0.0292(Antibiotic Penicillin-like) + 0.0409(Glycogen synthase kinase-3 inhibitor) + 0.0496(Carcinogenic. mouse. male. thyroid gland) -0.103(Cyclooxygenase substrate) + 0.058(Galanin receptor 2 antagonist) + 0.225(NAD+ diphosphatase inhibitor) + 0.0129(MW) + 0.026(Farnesoid X receptor agonist) -0.0438(Carcinogenic. rat. female. oral cavity) -0.05(Choleretic) + 0.0898(Lysine carboxypeptidase. catalytic subunit inhibitor) + 0.149(CMP-N-acylneuraminate phosphodiesterase inhibitor) -0.0617(Nicotinic alpha7 receptor agonist) + 0.0214(11-Beta-hydroxysteroid dehydrogenase 2 inhibitor) -0.0718(Melatonin 2 agonist) + 0.0195(Alcohol dehydrogenase substrate) + 0.0659(Amylin agonist) -0.103(4-Hydroxy-4-methyl-2-oxoglutarate aldolase inhibitor) -0.0396(Monophenol monooxygenase inhibitor) + 0.0277(Carcinogenic. rat. male. all tumor bearing animals) + 0.00954(Antineoplastic (non-small cell lung cancer)) -0.014(Nicotinic receptor alpha2 subunit antagonist) -0.0284(ErbB-2 antagonist) -0.0374(Polycystin-2 inhibitor) -0.0339(Paget's disease treatment) + 0.0259(Phospholipase D2 inhibitor) -0.0237(CXC chemokine 5 receptor antagonist) -0.0296(Melatonin agonist) -0.00709(Prostate disorders treatment) -0.0473(Glucose-6-phosphate isomerase inhibitor) -0.0402(Polynucleotide 5'-hydroxy-kinase inhibitor) + 0.0144(ATPase inhibitor) + 0.00651(Protein kinase C beta inhibitor) + 0.0115(TIMP1 expression enhancer) + 0.0146(Phosphoenolpyruvate carboxykinase (ATP) inhibitor) + 0.00421(O6-alkylguanine-DNA alkyltransferase inhibitor) + 0.00391(Endothelin converting enzyme 1 inhibitor) -0.00978(Syk tyrosine kinase inhibitor) + 0.00285(Motilin receptor agonist) -0.00332(CC chemokine 2 receptor antagonist) + 0.00737([3-methyl-2-oxobutanoate dehydrogenase (lipoamide)] kinase inhibitor) -0.000744(Sodium/hydrogen exchanger 1 inhibitor) -0.000565(Neutral endopeptidase inhibitor) + 0.00192(Plasminogen activator stimulant) + 5.94

Model 20

-0.019(Thiopurine S-methyltransferase inhibitor) + 0.649(Narcotic antagonist) -0.326(Prostaglandin-E2 synthase 1 inhibitor) -0.528(Length) + 0.687(Potassium channel Kv1.1 blocker) + 32(Lipophilicity) + 33.9(Length^3) + 0.162(NumAromAtoms) -0.0349(Cyclooxygenase 2 inhibitor) + 0.881(Procollagen-lysine 5-dioxygenase inhibitor) + 1.06(Calmodulin-domain protein kinase 1 inhibitor) -0.548(Glutamate (mGluR5) agonist) + 0.0198(Sodium/calcium exchanger 1 inhibitor) -0.123(Thymidine kinase (Herpes simplex virus 1) inhibitor) -0.358(Agranulocytosis) -0.000818(Lipophilicity^3) -2.01(N-formylglutamate deformylase inhibitor) -1.12(Thrombin inhibitor) -1.41(Phosphodiesterase 1C inhibitor) + 0.338(Bradycardic) + 2.01(Methionyl aminopeptidase inhibitor) + 0.321(Ceramidase inhibitor) -0.214(HIV-1 protease inhibitor) + 0.255(TRPM8 blocker) + 0.54(Convulsant) + 0.252(Asparaginase inhibitor) -0.828(Protein phosphatase 2A inhibitor) -1.07(MAO inhibitor) + 0.459(Corticosteroid-like) + 0.884(Intermittent claudication treatment) + 0.474(Radioprotector) + 0.864(HCV NS3/NS4A protease inhibitor) -0.421(Histamine release inhibitor) -1.25(Inner centromere protein inhibitor) -0.266(Steroid 17-alpha-hydroxylase/17.20 lyase inhibitor) + 0.402(Protein kinase C iota inhibitor) -0.819(Hyperthermic) -0.631(Phosphodiesterase 8B inhibitor) + 0.531(CYP11B2 inhibitor) + 0.0744(Antineoplastic (non-Hodgkin's lymphoma)) -0.796(Non-steroidal antiinflammatory agent) -0.728(CYP3A4 inducer) -0.0643(Interleukin 1b antagonist) -0.802(Glutamate synthase (ferredoxin) inhibitor) + 0.195(CYP3A5 expression enhancer) + 0.944(Ulceration) + 0.584(Weight gain) + 0.402(Psychostimulant) -0.161(Dihydroorotase inhibitor) -1.46(Shaker potassium channel blocker) + 0.866(CYP2G1 substrate) + 0.599(GSTP1 expression enhancer) -0.534(CCND3 expression inhibitor) -0.348(Neurotrophic factor) -0.891(CCNA2 expression enhancer) + 0.634(Dyskinesia) -0.649(Prostaglandin EP3 antagonist) + 0.247(Caspase 6 inhibitor) -0.173(TGF beta receptor type I kinase inhibitor) + 0.545(Antifungal) -0.276(Glycogen phosphorylase. liver form inhibitor) -0.273(Embryotoxic) -0.747(TGFB1 expression enhancer) + 0.492(Carbonic anhydrase XI inhibitor) + 0.285(Ileal bile acid transport inhibitor) -14.7(Volume^2) -0.191(Carbonyl reductase [NADPH] 1 inhibitor) -0.296(Matrix metalloproteinase (membrane-type) inhibitor) -0.754(YWHAE expression inhibitor) + 0.618(CDH1 expression enhancer) -0.0776(Skin irritation. high) + 0.164(Integrin alphaVbeta1 antagonist) + 0.277(Clk dual-specificity kinase inhibitor) + 0.306(Protein kinase inhibitor) -0.148(TRPA1 antagonist) + 0.609(Potassium channel Kv1.5 blocker) + 0.397(Phosphodiesterase XI inhibitor) -0.333(Endothelin B receptor antagonist) -0.293(MAP kinase 13 inhibitor) -0.442(Gastrointestinal motility stimulant) -0.24(Antiprotozoal (Amoeba)) + 0.492(Torsades de pointes) + 0.144(Imidazoleacetate 4-monooxygenase inhibitor) + 0.275(Transglutaminase 2 inhibitor) + 0.287(Cytokine modulator) -0.284(Dopamine D1B antagonist) -0.135(Kynurenine 3 monooxygenase inhibitor) + 0.285(ABCC2 expression enhancer) -0.687(Sigma 2 receptor antagonist) + 0.888(Thyroid hormone alpha 1 antagonist) + 0.38(UDP-N-acetylmuramate-L-alanine ligase inhibitor) -0.243(Carcinogenic. mouse) + 0.629(Menopausal disorders treatment) -0.382(Prokinetic) + 7.76(Volume) + 0.254(Glyceryl-ether monooxygenase inhibitor) -0.797(3(or 17)beta-hydroxysteroid dehydrogenase inhibitor) -0.418(Aspartate 4-decarboxylase inhibitor) + 0.46(Imidazoline I2 receptor antagonist) -0.139(GST P substrate) -0.167(Keratoses actinic (solar) treatment) -13.3(Length^2) -0.126(Sleep disturbance) -0.0455(Alpha-N-acetylgalactosaminide alpha-2.6-sialyltransferase inhibitor) -0.774(Hydroxyacylglutathione hydrolase inhibitor) -0.136(Protein kinase (CK2) alpha inhibitor) + 0.23(dTMP kinase inhibitor) -0.313(TEC kinase inhibitor) -0.143(Histidine-rich protein PFHRP-II inhibitor) -0.342(Panic) + 0.294(15-Lipoxygenase 2 inhibitor) -0.876(Glutamate (mGluR6) antagonist) + 0.318(Plasminogen activator inhibitor antagonist) + 0.529(Fatty acid binding protein adipocyte inhibitor) -0.278(Transforming growth factor antagonist) + 0.451(JNK mitogen-activated protein kinase inhibitor) + 0.236(Antiviral (Influenza)) + 0.623(Histone deacetylase inhibitor) -0.402(JUN expression inhibitor) + 0.407(Carcinogenic. rat. female. vascular system) -0.392(Heat shock protein 90 antagonist) + 0.379(Estrogen alpha receptor agonist) + 0.183(CYP2D substrate) + 0.355(SLC7A11 expression enhancer) + 0.307(BCL2 expression inhibitor) -0.51(Histone deacetylase 2 inhibitor) -0.359(Cytokine production inhibitor) -0.216(Protein-tyrosine phosphatase 1B inhibitor) + 0.281(Focal adhesion kinase inhibitor) -0.811(Asparagine synthase (glutamine-hydrolysing) inhibitor) + 0.153(Biliary tract disorders treatment) -0.177(Estradiol 17 beta dehydrogenase inhibitor) -0.0375(NumAcceptor) + 0.094(MW) -0.508(Histone deacetylase 5 inhibitor) -0.288(Renin inhibitor) -0.666(Protein phosphatase 2B inhibitor) + 1.01(MAP3K11 inhibitor) + 0.148(HCV NS5A inhibitor) + 0.72(Argininosuccinate synthase inhibitor) -0.2(Leukotriene B4 receptor 2 antagonist) + 0.261(Human rhinovirus A protease inhibitor) + 0.119(Myocarditis) + 0.185(CDC7 inhibitor) -0.327(Protein kinase C zeta inhibitor) -0.165(Retinoic acid beta receptor agonist) + 0.329(Mediator release inhibitor) + 0.252(Peristaltic stimulant) -1(Low molecular weight phosphotyrosine protein phosphatase inhibitor) -0.113(Botulinum neurotoxin type A inhibitor) + 0.906(Progesterone receptor B1 antagonist) + 0.248(AR expression inhibitor) -0.287(CYP2C substrate) + 0.12(Antileukemic) + 0.185(5 Hydroxytryptamine 1F antagonist) -0.124(CYP51 inhibitor) + 0.223(Opioid mu 1 receptor antagonist) + 0.225(VLA-4 antagonist) -0.211(11-Beta-hydroxysteroid dehydrogenase inhibitor) -0.26(Complement C3a chemotactic receptor antagonist) + 0.125(Antineoplastic (bone cancer)) + 0.275(Cytochrome P450 stimulant) + 0.427(Purinergic P2X2 antagonist) -0.0883(Ribosomal protein S6 kinase alpha 2 inhibitor) -0.136(Antineoplastic (small cell lung cancer)) -0.199(DNA damaging) + 0.143(Thrombolytic) + 0.107(Cathepsin V inhibitor) + 0.176(Ca2+/calmodulin-dependent kinase II delta inhibitor) -0.239(Potassium channel intermediate-conductance Ca-activated blocker) + 0.265(Kinesin antagonist) -0.308(Pruritus) -0.125(Protein-serine-threonine kinase inhibitor) -0.365(AKR1C2 expression enhancer) -0.116(PI4-kinase beta inhibitor) + 0.0726(Troponin C inhibitor) -0.293(Propanediol dehydratase inhibitor) + 0.156(Sialidase 3 inhibitor) -0.151(Sodium/bile acid cotransporter inhibitor) -0.23(EREG expression enhancer) -0.264(5 Hydroxytryptamine 2 agonist) + 0.404(AMP-activated protein kinase. alpha-2 subunit inhibitor) + 0.859(Fatty acid binding protein inhibitor) -0.172(Choreoathetosis) + 0.0632(NumPositive) + 0.403(Phosphate acetyltransferase inhibitor) + 0.0991(Multiple sclerosis treatment) + 0.486(Cell wall synthesis inhibitor) + 0.161(Eukaryotic translation initiation factor 2-alpha kinase 3 inhibitor) + 0.198(Pepsin inhibitor) -0.537(GABA transporter 1 inhibitor) -0.487(Andropause treatment) + 0.143(Estrone sulfatase inhibitor) + 0.156(5 Hydroxytryptamine 6 agonist) + 0.254(Pectin lyase inhibitor) + 0.163(Nicotinic acid receptor agonist) + 0.236(Endopeptidase La inhibitor) + 0.149(5 Hydroxytryptamine 1 antagonist) -0.254(Guanylate cyclase inhibitor) -0.219(Ribosomal protein S6 kinase alpha 4 inhibitor) + 0.137(Urticaria) -0.106(Elongation of very long chain fatty acids protein 3 inhibitor) -0.267(SULT1A3 substrate) + 0.15(Nephritis) -0.391(Kallikrein 13 inhibitor) -0.276(Antinaupathic) + 0.168(ABCB1 expression enhancer) -0.0978(Lymphocytopoiesis inhibitor) + 0.102(Substance P antagonist) -0.258(Xanthine oxidase inhibitor) -0.193(Protein kinase (CK2) inhibitor) -0.118(Preterm labor treatment) + 0.32(LGALS8 expression enhancer) -0.125(Interleukin 8 antagonist) -0.119(Analgesic. opioid) -0.117(Nicotinic alpha3beta4 receptor agonist) -0.115(Kainate receptor 1 antagonist) + 0.558(Kinesin-like protein 1 inhibitor) -0.353(HSD17B1 expression enhancer) + 0.345(Chloride/bicarbonate exchanger inhibitor) + 0.132(Ribosomal protein S6 kinase 2 inhibitor) + 0.115(Carbonic anhydrase XII inhibitor) + 0.0645(Interleukin 2 antagonist) -0.158(Acid phosphatase inhibitor) + 0.109(Trypsin III inhibitor) + 0.151(Troponin T. cardiac muscle inhibitor) + 0.116(Protein 30S ribosomal subunit inhibitor) + 0.305(5 Hydroxytryptamine 3 agonist) -0.261(Dopamine D3 agonist) -0.332(Heat shock protein 70 agonist) -0.117(CDC25A inhibitor) -0.113(Diabetes insipidus treatment) + 0.0827(HERG 1 channel blocker) + 0.336(Activating transcription factor 1 inhibitor) -0.17(Aurora kinase inhibitor) + 0.0915(Luteinizing hormone-releasing hormone antagonist) + 0.203(Phosphatidylcholine-sterol O-acyltransferase inhibitor) + 0.093(Analeptic) -0.105(NADPH oxidase 4 inhibitor) + 0.0906(CC chemokine receptor antagonist) -0.312(Potassium channel KCNQ2 activator) + 0.11(Cataract) -0.081(Aldose reductase substrate) + 0.142(Carcinogenic. mouse. male. thyroid gland) + 0.0898(G-protein coupled bile acid receptor 1 antagonist) -0.306(Purine nucleosidase inhibitor) -0.0687(Antineoplastic (lymphocytic leukemia)) -0.0642(Polyadenylate-binding protein 1 inhibitor) + 0.0485(Psychotropic) + 0.0964(Prostaglandin E2 agonist) -0.514(Histone deacetylase 10 inhibitor) + 0.0612(Alpha 2c adrenoreceptor agonist) -0.249(Baculoviral IAP repeat-containing protein inhibitor) + 0.0534(Antineoplastic (liver cancer)) + 0.191(Amylin agonist) + 0.139(Narcolepsy treatment) -0.105(Retinoic acid receptor antagonist) + 0.136(MAP kinase 14 inhibitor) + 0.0917(Porphyria) -0.134(PPARG expression enhancer) + 0.202(Hydroperoxide dehydratase inhibitor) -0.0694(Antibiotic Tetracycline-like) + 0.159(Secretase beta inhibitor) -0.0759(Serine O-acetyltransferase inhibitor) -0.14(Chymase inhibitor) -0.169(GABA B receptor agonist) + 0.0971(Amine dehydrogenase inhibitor) + 0.0454(Dual specificity phosphatase inhibitor) -0.232(Testosterone 17beta-dehydrogenase inhibitor) + 0.0242(Antiinflammatory) + 0.0692(Protein kinase B beta inhibitor) + 0.126(Carnitine 3-dehydrogenase inhibitor) -0.143(Procollagen C-endopeptidase inhibitor) -0.146(Melatonin 5 antagonist) -0.0586(Vascular (periferal) disease treatment) + 0.142(Cytokine production stimulant) + 0.193(3-Deoxy-7-phosphoheptulonate synthase inhibitor) + 0.108(Membrane permeability enhancer) -0.0773(Endothelin receptor antagonist) + 0.191(Collagenase inhibitor) + 0.0105(NumHal) -0.116(Aldehyde dehydrogenase (NAD+) inhibitor) -0.0552(Hypomania) -0.0476(Purinergic P2Y antagonist) + 0.156(Fibrinogen beta chain inhibitor) -0.0758(Phosphatidate phosphatase inhibitor) + 0.149(CC chemokine 9 receptor antagonist) + 0.189(Cyclohexadienyl dehydrogenase inhibitor) + 0.0694(CYP2B6 substrate) + 0.0503(Cyclin-dependent kinase 7 inhibitor) -0.0569(Cyclin-dependent kinase 4 inhibitor) + 0.189(1-Pyrroline-5-carboxylate dehydrogenase inhibitor) + 0.0878(Hypocalcaemic) + 0.13(SERPINE1 expression enhancer) + 0.0556(Carcinogenic. rat. female. lung) -0.0812(X-Pro dipeptidase inhibitor) -0.117(Dactylysin inhibitor) -0.0568(BAD expression inhibitor) -0.109(Sleep apnea treatment) + 0.139(Progesterone receptor A antagonist) -0.103(Heat shock protein 90 beta antagonist) -0.0618(COL1A1 expression inhibitor) -0.0211(Sporulation kinase A inhibitor) + 0.0648(Beta 1 adrenoreceptor antagonist) + 0.0268(Vasodilator. peripheral) + 0.0286(Histone deacetylase class II inhibitor) -0.055(Histidine decarboxylase inhibitor) + 0.0245(Mcl-1 antagonist) -0.029(Vasopressin 2 agonist) + 0.0511(Formate dehydrogenase inhibitor) -0.024(Keratolytic) + 0.0491(Antiinflammatory. ophthalmic) -0.0586(Beta amyloid protein antagonist) + 0.0298(Antialcoholic) + 0.018(Elastase 3A inhibitor) -0.0185(Cyclin-dependent kinase 5 activator 1 inhibitor) -0.0185(Phosphodiesterase 7B inhibitor) -0.052(Tryptophan 5 hydroxylase inhibitor) -0.0179(Nicastrin inhibitor) -0.0219(Cyclin-dependent kinase 2 inhibitor) + 0.0179(Phosphodiesterase 6H inhibitor) + 0.0138(Antibiotic Penicillin-like) + 0.0186(Cyclin-dependent kinase inhibitor) + 0.0136(Phosphomevalonate kinase inhibitor) -0.0187(Malaise) -0.0401(Oxaloacetate tautomerase inhibitor) -0.0112(Melatonin 1b antagonist) + 0.0134(Colony stimulating factor antagonist) -0.034(Peptidyl-prolyl cis-trans isomerase inhibitor) -0.0074(Spasmolytic. urinary) -0.0156(AKR1C1 expression enhancer) -0.00808(MAP kinase 9 inhibitor) + 0.0288(Fibrinogen gamma chain inhibitor) -0.0108(PCNA expression enhancer) + 0.00318(Antianginal) + 0.00889(SLC2A3 expression inhibitor) + 0.0132(Phosphodiesterase VII inhibitor) + 0.00384(Protocollagen prolyl hydroxylase inhibitor) + 0.00291(Thyroid hormone alpha antagonist) -0.00253(Integrin alphaVbeta5 antagonist) -0.00727(Adenylylsulphatase inhibitor) + 0.00471(Thymidine kinase inhibitor) + 0.000377(Microsomal triglyceride transfer protein inhibitor) -0.000132(Hypoventilation) + 5.23

Model 41

+ 0.673(Thiopurine S-methyltransferase inhibitor) + 0.505(CYP2D6 substrate) -0.479(Agranulocytosis) + 0.734(Ceramide glucosyltransferase inhibitor) + 0.189(Periodontitis treatment) + 8.98(Length) -0.932(Aspartate ammonia-lyase inhibitor) -0.49(Nicotinic receptor alpha5 subunit antagonist) -0.0832(Aggrecanase inhibitor) -0.48(CYP2 substrate) -12.2(Length^2) + 0.326(Adenosine A2 receptor antagonist) -0.144(Carcinogenic. rat. male. nasal cavity) + 0.282(Hypothermic) + 0.534(Tremor) -0.447(Anti-Helicobacter pylori) + 0.586(Gynecological disorders treatment) -0.132(Antihypermotility) + 0.0231(Adenylate cyclase I inhibitor) -0.0519(Antidote. heavy metal) -0.622(Antihematotoxic) -1.07(Sigma 2 receptor antagonist) + 0.377(Progesterone receptor A antagonist) + 0.757(Sentrin-specific protease 6 inhibitor) -0.374(Carcinogenic) + 0.322(Carnitine 3-dehydrogenase inhibitor) + 1.33(Colony stimulating factor agonist) + 0.106(Ribosomal protein S6 kinase inhibitor) -0.623(Epstein-Barr nuclear antigen 1 inhibitor) + 28.3(Volume) + 0.47(Hypolipemic) + 7.61(Volume^3) -25.7(Volume^2) + 0.272(GDPD3 expression enhancer) + 0.216(MAP-kinase-activated kinase 2 inhibitor) -0.286(Prostatic (benign) hyperplasia treatment) -0.482(DNA-(apurinic or apyrimidinic site) lyase inhibitor) -0.57(Cyclin-dependent kinase 1 inhibitor) + 0.0119(MAP kinase kinase 2 inhibitor) -0.257(SUMO-activating enzyme subunit 1 inhibitor) + 2.06(Sialidase 1 inhibitor) -1.03(Hydroxypyruvate reductase inhibitor) -0.627(Saccharopine dehydrogenase (NADP+. L-lysine-forming) inhibitor) -0.338(Antiviral (Hepatitis)) + 0.41(Inosine monophosphate dehydrogenase 1 inhibitor) -0.518(Acylaminoacyl-peptidase inhibitor) + 0.717(N-carbamoyl-L-amino-acid hydrolase inhibitor) + 0.00582(Glucose-1.6-bisphosphate synthase inhibitor) -0.27(Tardive dyskinesia treatment) -0.973(Cholesterol antagonist) + 0.48(Carcinogenic. rat. female. vascular system) -0.967(Glutathione reductase inhibitor) + 0.733(Phenylalanine 4-hydroxylase inhibitor) -0.923(Thrombin inhibitor) + 0.793(Progesterone receptor B1 antagonist) -0.629(Janus tyrosine kinase inhibitor) + 0.417(Cytosolic phospholipase A2 beta inhibitor) -0.304(Proto-oncogene tyrosine-protein kinase CSK inhibitor) -0.415(CYP2B1 substrate) -0.803(UDP-3-O-acyl-N-acetylglucosamine deacetylase inhibitor) + 0.171(Farnesyltransferase inhibitor) + 0.354(Carcinogenic. rat. female. nasal cavity) -0.258(NGFR expression enhancer) + 0.712(IL1B expression enhancer) -0.321(Catalase stimulant) + 1.11(Saccharopine dehydrogenase (NAD+. L-lysine-forming) inhibitor) + 0.806(Ribosomal protein S6 kinase 1. 70-kDa inhibitor) + 0.662(Chloride/bicarbonate exchanger inhibitor) -1.31(NF-kappa-B essential modulator inhibitor) + 0.155(Aconitate hydratase inhibitor) + 0.381(ABCB1 expression enhancer) -0.34(Ribosomal protein S6 kinase alpha 3 inhibitor) + 0.421(Gastrointestinal disturbance) -2.45(Chalcone isomerase inhibitor) -1.8(Phosphoribulokinase inhibitor) -0.316(Lysophosphatidic acid 3 receptor antagonist) -0.0158(Carcinogenic. mouse. male) -0.0844(Vanilloid 1 agonist) + 1.11(Adenosine A1 receptor agonist enhancer) -0.346(Purinergic P2 antagonist) + 0.4(Psychostimulant) -0.312(Interferon inducer) + 1.32(Procollagen-proline 3-dioxygenase inhibitor) + 0.973(SUMO-conjugating enzyme UBC9 inhibitor) + 0.398(DNA gyrase subunit A inhibitor) + 0.186(Antiviral (Influenza A)) -0.383(Microtubule stabilization) + 0.194(Ototoxicity) + 0.679(Adenylate cyclase stimulant) -0.355(Macrophage elastase inhibitor) -0.331(Antiviral (Poxvirus)) -0.741(Arylamine N-Acetyltransferase substrate) + 0.305(Protein kinase C iota inhibitor) + 0.267(Convulsant) -0.18(Trypsin I inhibitor) -0.369(DDIT4 expression enhancer) + 0.49(CYP2G1 substrate) -0.655(Vitamin) -0.0191(WIPI1 expression enhancer) -0.39(5 Hydroxytryptamine 4E antagonist) -0.179(Hemozoin inhibitor) -0.247(Aspartate 4-decarboxylase inhibitor) -0.359(Trans-octaprenyltranstransferase inhibitor) + 0.0599(Phosphodiesterase 6G inhibitor) + 0.595(Narcolepsy treatment) + 0.317(Integrin alpha1beta1 antagonist) -0.466(Dermatitis) -0.318(Ribosomal protein S6 kinase alpha 4 inhibitor) -0.228(Vasopressin 2 agonist) -0.105(Gamma-secretase subunit PEN-2 inhibitor) + 0.161(Transglutaminase 2 inhibitor) + 0.72(FOS expression enhancer) -0.325(MAP3K7 inhibitor) + 0.41(Growth hormone releasing factor agonist) + 0.0765(Substance P antagonist) + 0.577(Lysine carboxypeptidase. catalytic subunit inhibitor) -0.256(Bradykinin B1 receptor antagonist) -0.135(GHS receptor agonist) -0.215(CDK2/cyclin E inhibitor) + 0.214(Caspase 9 inhibitor) -0.187(Carcinogenic. mouse. male. liver) -0.362(Neuronal nicotinic receptor antagonist) -0.635(Phosphoglycolate phosphatase inhibitor) -0.416(Contraceptive) -0.143(Angiotensin antagonist) + 0.178(Geranylgeranyltransferase I inhibitor) + 0.268(ATP-dependent RNA helicase inhibitor) + 0.413(Skin irritation. weak) + 0.273(Carcinogenic. rat. male. all tumor bearing animals) + 0.955(Thromboxane A2 antagonist) + 0.366(Allergic reaction) + 1.47(Transcortin receptor antagonist) + 0.269(Carbonic anhydrase XII inhibitor) + 0.574(Carbonic anhydrase X inhibitor) -0.22(Calcium-dependent phospholipase A2 inhibitor) -0.124(Beta-ureidopropionase inhibitor) -0.5(Polyamine biosynthesis inhibitor) -0.858(Melatonin 2 agonist) -0.698(Neuropathy treatment) -0.633(Lysozyme inhibitor) + 0.223(Biliary tract disorders treatment) -0.124(Prostate cancer treatment) -0.622(SQLE expression inhibitor) -0.371(Acid phosphatase inhibitor) -0.474(Calpain small subunit 1 inhibitor) -0.148(Prostaglandin F2 alpha antagonist) + 0.424(Carcinogenic. rat. female. large intestine) -0.256(Integrin beta6 antagonist) -0.291(MAP kinase 9 inhibitor) + 1.14(Adenosine A2b receptor antagonist) -0.651(3-Alpha-hydroxysteroid dehydrogenase type II inhibitor) + 0.275(Tryptophan hydroxylase 1 inhibitor) -0.69(Quinone reductase 2 inhibitor) + 0.247(CDC7 inhibitor) + 0.231(Nausea) + 0.164(Interleukin 1 antagonist) -0.164(Bradykinin agonist) + 0.364(Ulcer. peptic) -0.2(Cholestasis) + 0.615(Stromelysin 2 inhibitor) + 0.18(ODC1 expression inhibitor) + 0.504(NF-E2-related factor 2 stimulant) + 0.17(Thiazolidinedione) -0.369(AKR1C1 expression enhancer) -0.18(Hypotension) + 0.198(Pulmonary edema) + 0.156(Ca2+/calmodulin-dependent kinase II alpha inhibitor) -1.02(Alpha-N-acetylgalactosaminide alpha-2.6-sialyltransferase inhibitor) + 0.442(Antinociceptive) + 0.334(Bronchoconstrictor) + 0.174(Sucrase-isomaltase inhibitor) + 0.882(Pyruvate dehydrogenase stimulant) + 0.413(Carcinogenic. group 1) + 0.281(Alpha adrenoreceptor antagonist) -0.659(UGT1A1 substrate) + 0.451(Imidazoline I2 receptor antagonist) + 0.869(Antineoplastic (insulinoma)) + 0.241(Rho-associated kinase II inhibitor) -0.42(CCNE1 expression inhibitor) -0.271(Splenomegaly) + 0.0946(Alzheimer's disease treatment) + 1.04(NAD(P)+ transhydrogenase (B-specific) inhibitor) -0.516(Carcinogenic. mouse. female) + 0.0699(Autoimmune disorders treatment) -0.956(5-Formyltetrahydrofolate cyclo-ligase inhibitor) -0.289(CYP3A7 substrate) + 0.277(Carcinogenic. group 2B) -0.457(Histamine H2 receptor agonist) + 0.462(Antiviral (CMV)) -0.239(Glutamate (mGluR) antagonist) -0.198(Antibiotic Penem-like) + 0.394(CYP1B1 expression enhancer) -0.421(ATF3 expression enhancer) -0.265(Immunomodulator) -0.185(Methionyl aminopeptidase 2 inhibitor) -0.597(Thyroid hormone antagonist) -0.118(Poly(ADP-ribose) polymerase inhibitor) + 0.179(Nicotinic acid receptor agonist) + 0.194(Histone deacetylase 6 inhibitor) -0.532(Prolyl endopeptidase inhibitor) + 0.315(Alanine transaminase inhibitor) -0.648(Beta 2 adrenoreceptor agonist) + 0.201(Alpha tubulin antagonist) -0.455(Stem cell growth factor agonist) -0.151(Protein kinase C beta II inhibitor) + 0.428(CYP4 substrate) + 0.0992(Angiogenesis inhibitor) -0.67(Carbonic anhydrase stimulant) -0.623(CC chemokine 8 receptor antagonist) -0.159(Selectin antagonist) + 0.211(Sigma receptor agonist) -0.222(Vascular endothelial growth factor 3 antagonist) -0.692(Lysophosphatidic acid 1 receptor antagonist) + 0.152(Baculoviral IAP repeat-containing protein 3 inhibitor) -0.95(AMP nucleosidase inhibitor) + 1.05(N-acylneuraminate cytidylyltransferase inhibitor) + 0.432(Phosphate acetyltransferase inhibitor) + 7.64(Length^3) -0.125(Topoisomerase II inhibitor) + 0.29(Dependence treatment) -0.149(Glutamate (mGluR group I) agonist) + 0.29(KLK3 expression inhibitor) -0.13(Cyclin H inhibitor) + 0.254(Glycogen synthase kinase-3 beta inhibitor) + 0.361(2-Enoate reductase inhibitor) + 0.672(Opioid kappa 2b receptor antagonist) + 0.416(Procollagen-lysine 5-dioxygenase inhibitor) -0.157(Myocardial ischemia treatment) + 0.667(Caspase 8 inhibitor) + 0.245(Cardiodepressant) -0.66(Nicotinate phosphoribosyltransferase inhibitor) + 0.382(GCLM expression enhancer) + 0.204(Melanin-concentrating hormone receptor antagonist) + 0.221(Antineurogenic pain) + 0.224(TIE-2 antagonist) + 0.67(Peptide deformylase inhibitor) + 0.239(Diuretic inhibitor) -0.309(Aurora kinase inhibitor) -0.16(Phosphodiesterase II inhibitor) + 0.0987(Transcription factor STAT1 inhibitor) -0.364(Cyclooxygenase inhibitor) + 0.183(Protocollagen prolyl hydroxylase inhibitor) -0.335(Antidepressant. Imipramin-like) + 0.209(Calcium channel blocker) -0.317(Choline-phosphate cytidylyltransferase inhibitor) -0.815(Dihydropyrimidinase inhibitor) -0.235(Cerebral hemorrhage) -0.15(Cyclin-dependent kinase 5 activator 1 inhibitor) -0.788(UGT2B20 substrate) -0.143(Secretase beta 2 inhibitor) -0.604(Serine-phosphoethanolamine synthase inhibitor) -0.137(Opioid mu receptor antagonist) -0.529(Cytosol alanyl aminopeptidase inhibitor) + 0.209(Diabetic neuropathy treatment) -0.408(Thiosulfate sulfurtransferase inhibitor) -0.201(Pruritus) + 0.202(Nitrile hydratase inhibitor) -0.312(CXC chemokine 5 receptor antagonist) + 0.332(Phospholipase inhibitor) -0.284(CCND3 expression inhibitor) + 0.161(5 Hydroxytryptamine release stimulant) -0.464(P2 nucleoside transporter inhibitor) + 0.56(Pyridoxamine-oxaloacetate transaminase inhibitor) -0.17(Ribosomal protein S6 kinase. 90-kDa inhibitor) + 0.341(Cytokine production stimulant) + 0.18(Radioprotector) -0.398(Glycine C-acetyltransferase inhibitor) + 0.17(Pain) + 0.176(Janus tyrosine kinase 1 inhibitor) -0.323(Alpha 1a adrenoreceptor antagonist) + 0.799(Uridine nucleosidase inhibitor) + 0.288(AR expression inhibitor) + 0.276(Acetate kinase inhibitor) + 0.374(Steroid synthesis inhibitor) + 0.427(Somatostatin 2 antagonist) -0.116(Potassium channel (Ca-activated) blocker) -0.268(Aldehyde dehydrogenase inhibitor) + 0.0882(Elastase 3B inhibitor) -0.284(UGT2B1 substrate) -0.111(Sodium/hydrogen exchanger inhibitor) -0.334(NRIP1 expression enhancer) -0.137(Sirtuin 1 inhibitor) -0.377(Purine nucleoside phosphorylase inhibitor) -0.0957(Raynaud's phenomenon treatment) + 0.759(CMP-N-acylneuraminate phosphodiesterase inhibitor) + 0.229(CXCR4 expression enhancer) + 0.565(D-Lysine 5.6-aminomutase inhibitor) -0.225(Carcinogenic. rat. male. vascular system) -0.278(Histidine decarboxylase inhibitor) + 0.119(Protease inhibitor) + 0.108(Carbonic anhydrase VB inhibitor) + 0.357(MAP3K10 inhibitor) -0.153(CASP9 expression enhancer) + 0.228(CYP1B substrate) + 0.258(Tyrosine phenol-lyase inhibitor) -0.277(Androgen antagonist) -0.0943(Panic) -0.095(Diabetes insipidus treatment) + 0.081(Integrin alpha4 antagonist) + 0.182(Protein-tyrosine phosphatase LC-PTP inhibitor) + 0.184(Nitrate reductase inhibitor) -0.134(IL4 expression inhibitor) -0.0691(Antioxidant) -0.15(Potassium channel Kv1.5 blocker) + 0.058(Phosphoglycerate kinase 2 inhibitor) + 0.0692(3 Beta-hydroxy-delta 5-steroid dehydrogenase inhibitor) -0.212(Peptidyl-Lys metalloendopeptidase inhibitor) + 0.151(Carcinogenic. mouse. female. ovary) + 0.141(Anticarcinogenic) -0.35(Cellulose synthase (UDP-forming) inhibitor) + 0.111(Histamine release stimulant) -0.184(Mannosyl-oligosaccharide glucosidase inhibitor) -0.0543(Antiemetic) -0.229(Glutamate synthase (ferredoxin) inhibitor) -0.0725(Aggrecanase 1 inhibitor) + 0.128(CDK4 expression inhibitor) + 0.148(Neuronal nitric oxide synthase inhibitor) -0.0553(Sigma 1 receptor agonist) -0.185(Transthyretin amyloid fibril formation inhibitor) -0.0729(CCND1 expression inhibitor) -0.0432(Keratoses actinic (solar) treatment) -0.0566(Wound healing agent) + 0.0215(Systemic lupus erythematosus treatment) -0.0408(Melanocortin 5 antagonist) + 0.0804(2-Nitropropane dioxygenase inhibitor) + 0.0787(Tryptophan 2.3-dioxygenase inhibitor) + 0.117(Nuclear factor of activated T-cells cytoplasmic 2 inhibitor) + 0.141(Phosphoglycerate dehydrogenase inhibitor) -0.0304(Antiviral (Trachoma)) -0.183(Orotate phosphoribosyltransferase inhibitor) -0.122(Synaptic vesicle protein SV2. levetiracetam binding site antagonist) + 0.0362(Vasopressin 2 antagonist) -0.0309(Gastroesophageal reflux disease treatment) -0.0678(EDN1 expression enhancer) + 0.0323(Signal transduction pathways inhibitor) -0.0486(Mydriatic) -0.1(3-Oxoacyl-[acyl-carrier-protein] synthase inhibitor) + 0.025(rRNA (adenosine-2'-O-)-methyltransferase inhibitor) + 0.0586(1-Acylglycerol-3-phosphate O-acyltransferase inhibitor) + 0.125(Tyrosine transaminase inhibitor) -0.0633(CYP11A1 expression enhancer) + 0.0457(Catechol oxidase inhibitor) + 0.0755(KiSS-1 receptor antagonist) + 0.0239(Cyclophilin A inhibitor) -0.0334(Glycosylceramidase inhibitor) + 0.0648(Antipruritic. non-allergic) -0.0283(Electron transport complex I inhibitor) + 0.0613(Integrin beta2 antagonist) + 0.0214(Smooth muscle myosin light chain kinase inhibitor) + 0.0206(Bulimia treatment) -0.0351(Palmitoyl-CoA hydrolase inhibitor) -0.0141(AMPA 4 receptor antagonist) + 0.011(Proto-oncogene tyrosine-protein kinase Fgr inhibitor) -0.0191(Carcinogenic. rat. male) + 0.0164(Dyskinesia) -0.0116(Retinoic acid beta receptor agonist) -0.034(Prostaglandin EP3 antagonist) + 0.0211(Serum sickness) + 0.0191(Glutathione-disulfide reductase inhibitor) + 0.0127(Dyslipidemia) + 0.0301(Tryptophan synthase inhibitor) -0.011(Carcinogenic. mouse. male. harderian gland) -0.0181(Potassium channel Kv4.3 blocker) + 0.0226(CYP24 inhibitor) -0.00442(Apical sodium codependent bile acid transporter inhibitor) + 0.0335(N-acetylglucosamine-6-phosphate deacetylase inhibitor) -0.0133(Glucose-dependent insulinotropic receptor agonist) -0.0126(Cathepsin L inhibitor) -0.0278(Fructokinase inhibitor) + 0.00359(Ocular toxicity) -0.00186(Akinesia) + 5.41

Model 42

+ 0.103(Thiopurine S-methyltransferase inhibitor) + 1.52(MAO B substrate) + 12.8(Length) -0.644(Neutropenia) + 0.386(Bradycardic) -0.641(CTNNB1 expression inhibitor) + 1.18(NOS2 expression enhancer) -1.67(Antineoplastic antimetabolite) -0.381(Carbonic anhydrase IX inhibitor) -21.2(Length^2) -0.34(Glucan 1.3-alpha-glucosidase inhibitor) -0.182(HIV-1 integrase (Strand Transfer) inhibitor) + 0.468(Immunosuppressant) + 0.1(Antineoplastic (uterine cancer)) + 1.78(Methionyl aminopeptidase 1 inhibitor) -0.444(Non-steroidal antiinflammatory agent) -0.523(CDK5/p25 inhibitor) + 29.9(Volume) + 0.303(Nuclear receptor subfamily 2. group E. member 3 agonist) + 1.17(Imidazoline I2 receptor antagonist) -1.06(Amyloid beta aggregation inhibitor) + 0.263(5 Hydroxytryptamine release stimulant) -0.138(Alpha-L-rhamnosidase inhibitor) -0.115(Aggrecanase 2 inhibitor) + 0.103(Thioredoxin glutathione reductase inhibitor) + 0.2(Respiratory distress syndrome treatment) + 2.15(Carbonic anhydrase XIV inhibitor) + 2.42(N-acylneuraminate cytidylyltransferase inhibitor) + 0.475(15-Lipoxygenase 2 inhibitor) + 11.6(Volume^3) + 0.754(CYP4B1 substrate) -0.461(Glycosuria) -0.329(Pyruvate dehydrogenase kinase inhibitor) -0.581(Phosphodiesterase VIII inhibitor) -0.356(Calcium-dependent phospholipase A2 inhibitor) -0.146(Plasminogen activator inhibitor) -0.804(Glutamate (mGluR2) antagonist) + 1.13(Anticataract) -0.693(Cyclic AMP modulator) -0.695(Phosphoglycolate phosphatase inhibitor) + 0.0755(mTOR inhibitor) + 0.53(Ribosomal protein S6 kinase 1. 70-kDa inhibitor) + 0.151(CYP3A5 expression enhancer) + 0.413(Matrix metalloproteinase 4 (membrane-type) inhibitor) + 0.322(Methylenetetrahydrofolate reductase (NADPH) inhibitor) -1.27(Carbonic anhydrase VI inhibitor) -0.299(Cytochrome P450 inhibitor) -0.156(Antiallergic) + 0.931(Formyl peptide receptor 1 antagonist) -0.33(Histamine release inhibitor) + 0.221(Sweating) -1.21(Shaker potassium channel blocker) -1.18(Histone deacetylase 9 inhibitor) + 0.775(FOS expression enhancer) + 0.55(Nicotinic acid receptor agonist) + 2.1(Arachidonic acid antagonist) + 0.0695(Purine biosynthesis inhibitor) -0.576(Hypoxanthine phosphoribosyltransferase inhibitor) -29(Volume^2) + 0.494(CYP1A1* substrate) -0.0452(Vitamin D-like) + 0.691(MYC expression enhancer) -0.798(Cholesterol synthesis inhibitor) + 0.418(N-carbamoyl-L-amino-acid hydrolase inhibitor) -0.267(Xanthine oxidase substrate) -0.521(Integrin beta3 antagonist) -0.494(6-Phosphofructo-2-kinase inhibitor) -0.272(Teratogen) -0.443(Aryl hydrocarbon receptor agonist) + 0.418(Growth hormone releasing factor agonist) -0.549(Neurotensin 3 receptor antagonist) -0.6(CCNA2 expression enhancer) + 0.299(Biliary tract disorders treatment) + 0.767(UGT2B4 substrate) + 0.174(Purinergic P2X4 antagonist) + 0.152(Human T-cell leukemia virus type I protease inhibitor) -0.183(L lactate dehydrogenase C4 inhibitor) -0.143(CDK2/cyclin E inhibitor) + 0.266(Alpha-L-fucosidase 1 inhibitor) -0.187(GST P substrate) -0.221(cAMP-dependent protein kinase type II-beta regulatory subunit inhibitor) + 0.368(Endometrios treatment) -0.198(HIV attachment inhibitor) + 0.319(Antidepressant) + 1.41(Peptide deformylase inhibitor) -0.214(HCV NS5B polymerase inhibitor) -0.195(TRPA1 antagonist) + 0.282(Electrolyte absorption antagonist) -0.766(Hot flush treatment) -0.881(Aminopeptidase B inhibitor) + 0.307(PfA-M1 aminopeptidase inhibitor) -0.452(Ribosomal protein S6 kinase alpha 1 inhibitor) + 1.59(Antineoplastic (insulinoma)) -0.473(S100P expression enhancer) -0.982(Histone-lysine N-methyltransferase. H3 lysine-9 specific 3 inhibitor) -0.0532(CYP2B6 expression enhancer) + 0.238(Ca2+/calmodulin-dependent kinase II delta inhibitor) + 0.278(Integrin antagonist) -0.435(Vascular adhesion protein 1 inhibitor) -0.303(Matrix metalloproteinase (membrane-type) inhibitor) + 0.711(Pneumotoxic) -0.446(Sleep apnea treatment) -0.198(Phosphodiesterase III inhibitor) + 0.613(Acetylcholinesterase inhibitor) -0.684(ATP phosphoribosyltransferase inhibitor) + 0.336(Gastrointestinal disturbance) + 12.4(Length^3) -0.125(Antineoplastic (lymphocytic leukemia)) -0.729(Corticotropin releasing factor antagonist) -0.743(Melatonin 2 agonist) -0.242(TNF expression inhibitor) -0.947(Aldose reductase inhibitor) -0.282(MAP kinase 14 inhibitor) -0.269(Kainate receptor 4 antagonist) + 0.355(Cell adhesion inhibitor) -0.384(Chymase inhibitor) -0.143(Angiotensin antagonist) + 0.989(Tyrosine transaminase inhibitor) + 0.154(Antineoplastic) -0.508(AKR1C2 expression enhancer) + 0.334(Antibiotic Cephalosporin-like) + 0.546(Cannabinoid CB1 receptor antagonist) + 0.336(Death-associated protein kinase inhibitor) -0.196(Neurotrophic factor) -0.269(CYP3A substrate) -0.407(CYP3A4 expression enhancer) + 0.0901(Histone deacetylase 6 inhibitor) -0.135(CDC25A inhibitor) -1.12(Carbonic anhydrase XIII inhibitor) -1.37(SMN2 expression enhancer) -1.12(NF-kappa-B essential modulator inhibitor) -0.267(Transforming growth factor antagonist) + 0.338(N-acetylneuraminate lyase inhibitor) + 0.188(Protein kinase C iota inhibitor) + 0.293(MAP kinase kinase 7 inhibitor) + 0.44(Formate-dihydrofolate ligase inhibitor) -0.221(Hexokinase stimulant) -0.901(CYP24 substrate) -0.932(Nicotinic receptor gamma subunit antagonist) + 0.646(S-adenosyl-L-methionine decarboxylase inhibitor) + 0.422(Vision disturbance) -0.399(Antiprotozoal (Amoeba)) -0.493(MAO inhibitor) + 0.193(Antineoplastic (bone cancer)) + 0.551(Phospholipase A2 inhibitor) + 0.205(Caspase 2 inhibitor) -0.787(Urocanate hydratase inhibitor) -0.207(Antiviral (Hepatitis)) -0.298(Protein kinase C beta I inhibitor) -0.188(Drowsiness) + 0.654(NMDA receptor subunit 3A antagonist) -0.59(Mannosyl-oligosaccharide glucosidase inhibitor) + 0.202(Pyrimidine antagonist) + 0.501(Glutamate (mGluR group I) antagonist) + 0.58(MAP kinase kinase inhibitor) -0.251(Potassium channel intermediate-conductance Ca-activated 4 blocker) -0.209(Aryl-acylamidase inhibitor) + 0.326(TIE-2 antagonist) -0.542(KIAA0101 expression inhibitor) + 0.321(Chorea) + 0.34(Arylamine N-acetyltransferase inhibitor) + 0.172(FABP1 expression enhancer) -0.167(RNA-directed RNA polymerase (Influenza A) inhibitor) + 0.142(Cannabinoid CB2 receptor agonist) -0.159(Antineoplastic (small cell lung cancer)) -0.144(Xenobiotic-transporting ATPase inhibitor) + 0.436(Phosphodiesterase VII inhibitor) + 0.173(Respiratory failure) -0.161(Protein-tyrosine kinase Lyn inhibitor) -0.486(CC chemokine receptor agonist) -0.759(Isopentenyl-diphosphate DELTA-isomerase inhibitor) + 0.132(Angiogenesis inhibitor) + 0.138(Interleukin 5 antagonist) + 0.381(Saluretic) -0.144(Protein phosphatase PP1 inhibitor) + 0.413(Narcolepsy treatment) + 0.463(CYP1A2 expression enhancer) -0.255(Antitoxic) + 0.66(Pyruvate dehydrogenase stimulant) + 0.215(Irritation) -0.106(Sigma 1 receptor antagonist) -0.821(GMP synthase inhibitor) + 0.689(Glycerol kinase inhibitor) -0.161(Nitric oxide antagonist) + 0.683(Neuraminidase inhibitor) -0.152(MAP kinase 9 inhibitor) -0.17(Cholecystokinin B antagonist) -0.112(CYP51 inhibitor) + 0.518(Granulocyte macrophage colony stimulating factor agonist) -0.122(Cyclin B1 inhibitor) + 0.185(Deoxynucleoside kinase inhibitor) + 0.201(Protocollagen prolyl hydroxylase inhibitor) -0.277(DNA-(apurinic or apyrimidinic site) lyase inhibitor) -0.126(Vascular endothelial growth factor 3 antagonist) + 0.304(Interleukin 6 antagonist) + 0.11(Antifungal (Candida)) + 0.543(Peptidyl-glycinamidase inhibitor) -0.176(Platelet activating factor alpha antagonist) + 0.685(Geranyltranstransferase inhibitor) + 0.124(Butyrate-CoA ligase inhibitor) + 0.283(Parotid gland enlargement) + 0.136(MAP-kinase-activated kinase inhibitor) + 0.183(MAP kinase 3 inhibitor) + 0.323(Expectorant) -0.311(Cell wall biosynthesis inhibitor) + 0.885(Postcoital contraceptive) -0.134(Polyadenylate-binding protein 1 inhibitor) -0.164(Thymidine kinase 2 inhibitor) + 0.0994(Alpha 2d adrenoreceptor agonist) -0.135(Protein kinase (CK2) inhibitor) -0.46(Cathepsin G inhibitor) -0.364(AMPA 3 receptor antagonist) -0.124(Antidiuretic hormone antagonist) + 0.315(Alanine transaminase inhibitor) -0.114(Antibiotic beta Lactam-like) -0.13(Fibrillation. atrial) -0.114(KPNB1 expression inhibitor) -0.448(Interferon antagonist) + 0.25(Histone deacetylase class IIb inhibitor) + 0.119(Postural (orthostatic) hypotension) -0.092(Antineoplastic (renal cancer)) -0.122(Glycogen synthase kinase-3 alpha inhibitor) -0.39(Syk tyrosine kinase inhibitor) + 0.268(CDK1 expression enhancer) -0.404(Tripeptidyl-peptidase I inhibitor) + 0.489(UDP-glucose 4-epimerase inhibitor) + 0.121(Enoyl-[acyl-carrier-protein] reductase (NADH) inhibitor) -0.325(EDN1 expression enhancer) -0.113(Acute neurologic disorders treatment) -0.214(Glutaminase inhibitor) -0.154(Alopecia (hair loss)) + 0.103(Transcription factor STAT1 inhibitor) -0.211(Heat shock protein antagonist) + 0.383(SPP1 expression enhancer) + 0.0712(Renal disease treatment) + 0.127(Phosphodiesterase XI inhibitor) -0.133(Electron transport complex I inhibitor) -0.29(Glutamate (mGluR5) agonist) + 0.132(Antialcoholic) -0.151(Carcinogenic. rat. female. liver) -0.339(Lactose synthase inhibitor) -0.279(Protease (Human cytomegalovirus) inhibitor) + 0.327(Endothelial nitric-oxide synthase inhibitor) -0.563(KLK3 expression enhancer) -0.2(P-glycoprotein inhibitor) + 0.215(Calcium channel (voltage-sensitive) blocker) -0.149(TGF beta receptor type I kinase inhibitor) -0.103(Extrapyramidal effect) -0.0932(Sleep disorders treatment) -0.169(Platelet growth factor antagonist) + 0.0707(Systemic lupus erythematosus treatment) -0.511(Orotate phosphoribosyltransferase inhibitor) -0.345(Estrogen-related receptor alpha antagonist) + 0.308(I kappa B kinase inhibitor) -0.301(Putrescine oxidase inhibitor) -0.137(Gastrin inhibitor) + 0.199(Acetylcholine antagonist) -0.204(Antismoking) -0.156(Potassium channel (Voltage-sensitive) activator) -0.105(Poly(ADP-ribose) polymerase inhibitor) + 0.0781(Phospholipase A1 inhibitor) + 0.0862(Dopamine D3 antagonist) + 0.0806(Phosphodiesterase 6G inhibitor) -0.112(Nonstructural protein 1 (Influenza A) inhibitor) -0.151(JUN expression inhibitor) -0.169(Alpha adrenoreceptor agonist) + 0.218(Anthranilate 3-monooxygenase (deaminating) inhibitor) + 0.0519(Rheumatoid arthritis treatment) -0.23(Thrombin inhibitor) + 0.393(Urate-ribonucleotide phosphorylase inhibitor) + 0.11(GSTP1 expression enhancer) + 0.284(Leukotriene antagonist) -0.0723(Osteoclast antagonist) -0.221(Hypoxia inducible factor 1 alpha inhibitor) -0.0864(Leukotriene B4 receptor 2 antagonist) + 0.0823(CYP1B1 substrate) + 0.072(Maillard reaction inhibitor) -0.0917(Phospholipase A2 X inhibitor) -0.0731(NADPH oxidase 4 inhibitor) + 0.0911(Xerostomia) + 0.466(Bis(5'-nucleosyl)-tetraphosphatase (symmetrical) inhibitor) + 0.142(Probable DNA dC->dU-editing enzyme APOBEC-3A inhibitor) + 0.151(Nav1.8 sodium channel blocker) -0.0662(Secretase beta 2 inhibitor) -0.0828(Ribosomal protein S6 kinase. 90-kDa inhibitor) + 0.102(Antiparasitic) -0.0349(Antiinflammatory) -0.177(Mandelate 4-monooxygenase inhibitor) + 0.162(Caspase 3 inhibitor) -0.0994(Steroid DELTA-isomerase inhibitor) -0.0674(Raynaud's phenomenon treatment) -0.0887(Melanin-concentrating hormone receptor 2 antagonist) + 0.103(Hypersexuality) + 0.29(Fibrinogen beta chain inhibitor) -0.277(Lysine carboxypeptidase inhibitor) + 0.176(VEGF expression inhibitor) + 0.0694(Opioid kappa receptor agonist) + 0.0716(Cathepsin L2 inhibitor) + 0.22(DNA ligase (ATP) inhibitor) + 0.191(MAP kinase signal-integrating kinase 1 inhibitor) -0.205(Potassium channel KCNQ activator) -0.171(Acetylcholine M5 receptor antagonist) + 0.0798(Alpha adrenoreceptor antagonist) + 0.073(Bulimia treatment) -0.131(Phosphodiesterase 1C inhibitor) -0.107(Cerebral hemorrhage) + 0.202(Phosphoenolpyruvate carboxylase inhibitor) -0.121(Matrix metalloproteinase 3 (membrane-type) inhibitor) + 0.0558(Estrone sulfatase inhibitor) -0.242(Carboxypeptidase E inhibitor) -0.238(Methionine adenosyltransferase inhibitor) -0.144(Heat shock protein 90 antagonist) + 0.0504(Thyroid hormone alpha antagonist) -0.116(VDR expression enhancer) -0.0754(MT1G expression enhancer) -0.0539(CYP2E substrate) -0.0596(Hyperbilirubinemia) -0.111(Janus tyrosine kinase inhibitor) -0.0606(Parkinsonism) + 0.0596(Lck kinase inhibitor) + 0.125(Antipruritic. non-allergic) -0.135(Methylenetetrahydrofolate dehydrogenase (NADP+) inhibitor) + 0.0377(Baculoviral IAP repeat-containing protein 2 inhibitor) + 0.138(Nicotinic receptor beta4 subunit antagonist) + 0.0287(Troponin C inhibitor) + 0.0295(PDCD4 expression enhancer) + 0.0478(Vascular endothelial growth factor 1 antagonist) -0.0282(T cell receptor antagonist) -0.0399(NACHT. LRR and PYD domains-containing protein 3 inhibitor) -0.0296(Antibiotic Tetracycline-like) -0.0316(Phosphoribosylglycinamide formyltransferase inhibitor) + 0.0342(Weight gain) + 0.0257(TRPM8 blocker) -0.0259(Dysmenorrhea treatment) + 0.027(Carcinogenic. rat. male. stomach) + 0.0294(Baculoviral IAP repeat-containing protein 3 inhibitor) -0.0252(Phosphodiesterase 7A inhibitor) -0.0465(Hematopoietic inhibitor) -0.0254(Dyspnea) + 0.047(Deacetoxycephalosporin-C synthase inhibitor) -0.0648(Retinoid X alpha receptor antagonist) + 0.192(Carbonic anhydrase X inhibitor) + 0.0321(Diabetic neuropathy treatment) + 0.0222(Anemia) + 0.0262(Carcinogenic. rat. male. urinary bladder) -0.083(Kexin inhibitor) -0.0147(Histone deacetylase SIRT2 inhibitor) + 0.0181(Phosphodiesterase 6H inhibitor) + 0.0132(Prostaglandin EP12 antagonist) + 0.0414(Nucleotidyltransferase inhibitor) -0.0393(Long-chain-fatty-acid-CoA ligase inhibitor) + 0.018(FOSL1 expression enhancer) -0.0125(Panic) + 0.0139(Antiprotozoal (Leishmania)) -0.00881(T cell receptor gamma-delta antagonist) + 0.0387(Sucrose alpha-glucosidase inhibitor) -0.0117(CYP3A5 substrate) -0.021(Glycogen phosphorylase. muscle form inhibitor) + 0.0223(Urate transporter 1 inhibitor) -0.0166(CXC chemokine 4 receptor antagonist) + 0.00811(Pancytopenia) + 0.00259(Inflammatory Bowel disease treatment) + 0.0105(Proliferative diseases treatment) -0.0107(Glutamate (mGluR) antagonist) -0.00756(ID1 expression enhancer) -0.00112(Aldose reductase substrate) -0.000584(Spasmolytic. urinary) -0.00209(5 Hydroxytryptamine 2C agonist) + 6.41

Model 43

-0.588(Thiopurine S-methyltransferase inhibitor) + 0.241(CYP2D substrate) -0.684(Agranulocytosis) + 12.3(Length) + 0.407(Hypothermic) -0.334(Platelet antagonist) + 0.227(Metalloproteinase-9 inhibitor) -0.38(CYP1A2 substrate) -15.6(Length^2) -0.0647(Sodium/calcium exchanger 1 inhibitor) + 0.792(Magnesium-protoporphyrin IX methyltransferase inhibitor) -0.407(Isocitrate lyase inhibitor) + 0.263(Cholinergic) + 0.345(Adenosine A2a receptor antagonist) -0.345(Nuclear receptor corepressor 2 inhibitor) + 0.439(Imidazoline receptor antagonist) + 0.311(Spasmolytic) -1.02(Antihematotoxic) + 0.116(Thioredoxin glutathione reductase inhibitor) -1.31(Amylo-alpha-1.6-glucosidase inhibitor) + 0.392(MAP-kinase-activated kinase inhibitor) + 0.368(Carcinogenic. rat. female. nasal cavity) + 1.84(Calmodulin-domain protein kinase 1 inhibitor) -0.148(Angiotensin antagonist) -0.652(5 Hydroxytryptamine 2A agonist) + 0.244(Protein-tyrosine sulfotransferase inhibitor) -0.325(AXL receptor tyrosine kinase inhibitor) + 0.507(CYP1A1* substrate) -0.192(Growth stimulant) + 0.722(Protein kinase B inhibitor) + 26.1(Volume) + 0.908(Formyl peptide receptor antagonist) -1.64(Vitamin) + 0.265(Sucrase-isomaltase inhibitor) -22.5(Volume^2) + 1.77(Cytidylate kinase inhibitor) -0.05(TNF convertase inhibitor) -0.833(Acid phosphatase inhibitor) + 0.669(Diabetic neuropathy treatment) -0.57(Inner centromere protein inhibitor) -0.671(Heat shock protein 70 agonist) + 0.265(Glutamate decarboxylase inhibitor) + 1.18(SPP1 expression enhancer) -0.349(Splenomegaly) -0.279(I kappa B kinase 1 inhibitor) + 1.18(Sulfinoalanine decarboxylase inhibitor) + 0.599(Diuretic inhibitor) -0.473(Metalloproteinase-3 inhibitor) + 0.963(Nucleotidyltransferase inhibitor) + 0.518(Ribonucleoside triphosphate reductase inhibitor) -1.12(CF transmembrane conductance regulator antagonist) -0.378(NGFR expression enhancer) + 0.0952(Antineoplastic (bone cancer)) -0.184(Antineoplastic (osteosarcoma)) -0.467(Glutathione S-transferase substrate) + 0.0194(Antieczematic atopic) + 0.446(Methylenetetrahydrofolate reductase (NADPH) inhibitor) + 0.566(Dyskinesia) -0.429(CYP3A4 inducer) + 7.08(Volume^3) -0.723(Carcinogenic. mouse. male) -1.03(Serine-phosphoethanolamine synthase inhibitor) -1.01(Thrombin inhibitor) + 0.151(Glucocorticoid antagonist) + 0.193(Transcription factor STAT1 inhibitor) -0.782(Agaritine gamma-glutamyltransferase inhibitor) -1.36(AMP nucleosidase inhibitor) + 0.194(CYP3A5 expression enhancer) -0.312(Cyclin B1 inhibitor) + 0.561(Carcinogenic. rat. female. lung) + 0.747(CXC chemokine 1 receptor antagonist) + 1.15(Hematopoietic) + 0.269(Thyroid hormone alpha antagonist) -0.507(Potassium channel (Ca-activated) activator) + 0.266(Integrin alpha4beta7 antagonist) -0.406(Opioid delta receptor antagonist) + 0.289(Transglutaminase 2 inhibitor) -0.202(Calcium-sensing receptor antagonist) + 0.956(Ethanolaminephosphotransferase inhibitor) + 0.748(Anthranilate 3-monooxygenase (deaminating) inhibitor) + 0.215(Gout treatment) -0.242(Antineoplastic (renal cancer)) + 0.274(Carcinogenic. group 2B) -0.385(Tyrosine-protein kinase TXK inhibitor) -0.0947(Melatonin 1 agonist) -0.24(Potassium channel intermediate-conductance Ca-activated 4 blocker) + 0.348(Antihypoxic) -0.263(Growth hormone releasing factor antagonist) + 0.381(Inosine monophosphate dehydrogenase 1 inhibitor) -0.27(Hypertensive. ophthalmic) -0.824(Glutathione reductase inhibitor) + 0.23(Hydroxymethylbilane synthase inhibitor) -0.82(Protein phosphatase 2B inhibitor) -0.211(Peroxisome proliferator-activated receptor gamma agonist) + 1.25((R)-aminopropanol dehydrogenase inhibitor) -0.415(Cerebral hemorrhage) -0.799(Shaker potassium channel blocker) -0.285(Serine-type D-Ala-D-Ala carboxypeptidase inhibitor) -0.234(Cyclin-dependent kinase 5 activator 1 inhibitor) + 0.201(Beta glucosidase inhibitor) + 0.271(5 Hydroxytryptamine 1F antagonist) + 1.1(SUMO-conjugating enzyme UBC9 inhibitor) + 0.237(Vision disturbance) + 0.296(Cruzipain inhibitor) + 0.421(Cytosolic phospholipase A2 inhibitor) -0.0231(Phosphodiesterase 10A inhibitor) -1.04(Orotate phosphoribosyltransferase inhibitor) -0.469(Iodide peroxidase inhibitor) + 1.73(Neuraminidase (Influenza A) inhibitor) -1.13(Glyoxylate reductase (NADP+) inhibitor) + 0.22(PDCD4 expression enhancer) + 0.675(Adenylate cyclase V inhibitor) + 0.323(Clk dual-specificity kinase inhibitor) + 8.75(Length^3) + 0.25(Bombesin 3 receptor antagonist) -0.431(Mandelate 4-monooxygenase inhibitor) -0.221(Kainate receptor 3 antagonist) + 0.833(CYP4B substrate) + 0.366(Protein kinase (CK1) gamma 2 inhibitor) -0.178(Cyclin T1 inhibitor) -0.661(Acylphosphatase inhibitor) -0.173(Alpha 2d adrenoreceptor agonist) -0.333(11-Beta-hydroxysteroid dehydrogenase 1 inhibitor) -0.335(Immunomodulator) -0.341(Pyruvate dehydrogenase kinase inhibitor) + 0.268(CYR61 expression enhancer) -0.274(Platelet activating factor alpha antagonist) -0.704(Kallikrein 13 inhibitor) -0.155(Autotaxin inhibitor) + 0.298(Cyclophilin A inhibitor) -0.649(DNA synthesis inhibitor) + 0.129(Angiogenesis inhibitor) + 0.386(CYP1A1 expression enhancer) + 0.7(STC2 expression enhancer) + 0.201(Neurokinin antagonist) -0.267(Retinoic acid alpha receptor agonist) -0.31(Ribosomal protein S6 kinase alpha 1 inhibitor) -0.207(Sodium/hydrogen exchanger 2 inhibitor) -0.504(FAS expression inhibitor) -0.294(Melatonin antagonist) + 0.164(Urologic disorders treatment) + 0.221(Diuretic) + 0.2(ABCB1 expression enhancer) -0.715(Indanol dehydrogenase inhibitor) + 0.112(Opioid kappa 1 receptor antagonist) + 0.514(Ulceration) -0.516(Carcinogenic. rat. male. large intestine) + 0.508(D-lactaldehyde dehydrogenase inhibitor) -0.318(SLC7A5 expression enhancer) -0.489(Protein Wnt-2 inhibitor) + 0.818(Pneumotoxic) -0.16(Prostacyclin antagonist) + 0.137(Ileal bile acid transport inhibitor) -0.517(Matrix metalloproteinase (membrane-type) inhibitor) + 0.162(TRPM8 blocker) -0.569(L-Serine ammonia-lyase inhibitor) -0.252(CYP2B1 substrate) + 0.705(Tetracycline antiport transporter antagonist) -0.506(Glutamate (mGluR group III) antagonist) + 0.7(Colony stimulating factor agonist) + 0.247(UDP-N-acetylmuramate-L-alanine ligase inhibitor) + 0.158(Eukaryotic translation initiation factor 2-alpha kinase 3 inhibitor) + 0.727(Sepiapterin deaminase inhibitor) + 0.379(Eye irritation. weak) + 0.429(Nitrilase inhibitor) -0.147(Drowsiness) + 0.186(Systemic lupus erythematosus treatment) -0.106(IL12B expression inhibitor) -0.621(UGT1A3 substrate) + 0.114(Antibiotic Carbacephem-like) + 0.86(Gastricsin inhibitor) -0.169(Insulin secretagoues) + 1.15(Adenylate kinase inhibitor) -0.493(5 Hydroxytryptamine 4 antagonist) + 0.797(Alanine dehydrogenase inhibitor) + 0.836(Fatty acid binding protein inhibitor) -0.479(SKP2 expression inhibitor) + 0.151(DNA gyrase subunit A inhibitor) -0.348(Dopamine beta hydroxylase inhibitor) -0.248(Lysophosphatidic acid 2 receptor antagonist) -0.671(Histone deacetylase class IV inhibitor) -0.576(HSD17B1 expression enhancer) -0.182(DNA-dependent protein kinase inhibitor) + 0.523(NAD(P)+ transhydrogenase (B-specific) inhibitor) -0.591(Cathepsin S inhibitor) + 0.259(Bronchoconstrictor) + 0.797(Histone deacetylase 1 inhibitor) + 0.236(5 Hydroxytryptamine 1 antagonist) -0.192(Phosphorylase kinase gamma subunit 2 inhibitor) -0.178(CYP2A6 inhibitor) + 0.637(Tyrosine phenol-lyase inhibitor) + 0.361(UGT1A9 substrate) + 0.225(Phosphatidylserine decarboxylase inhibitor) -0.127(Fibrosis treatment) -0.408(Catechol 2.3-dioxygenase inhibitor) + 0.219(Insulin antagonist) + 0.398(SLC2A3 expression inhibitor) -0.403(CA2 expression enhancer) -0.223(Aurora-B kinase inhibitor) -0.143(Paraplegia) + 0.163(Endometrios treatment) -0.528(Estrogen-related receptor alpha antagonist) -0.2(2.3-Oxidosqualene-lanosterol cyclase inhibitor) -0.138(Non mutagenic. Salmonella) -0.482(Nicotinic alpha7 receptor agonist) -0.121(Anticonvulsant) -0.598(Glutathione synthase inhibitor) -0.15(Polyadenylate-binding protein 1 inhibitor) -0.917(Homoserine dehydrogenase inhibitor) + 0.372(Morphine 6-dehydrogenase inhibitor) + 0.0755(GHS receptor antagonist) -0.475(Adenine phosphoribosyltransferase inhibitor) + 0.171(Interleukin 4 antagonist) -0.363(CDK2 expression inhibitor) -0.69(TP73 expression enhancer) + 0.159(Antineoplastic (endocrine cancer)) + 0.375(Arylamine N-acetyltransferase inhibitor) -0.17(Nonstructural protein 1 (Influenza A) inhibitor) -0.1(Antiviral (Hepatitis B)) -0.433(Quinone reductase 2 inhibitor) -0.155(Mucosal addressin cell adhesion molecule 1 inhibitor) + 0.54(Acetate kinase inhibitor) -0.204(Gastrin inhibitor) + 0.606(D-alanine transaminase inhibitor) -0.175(Homoserine kinase inhibitor) + 0.114(Phosphoglycerate kinase 2 inhibitor) -0.236(Antiprotozoal (Amoeba)) + 0.158(Antiprotozoal (Toxoplasma)) + 0.585(Phosphate acetyltransferase inhibitor) + 0.46(MAP kinase kinase inhibitor) -0.502(Gamma-glutamyl hydrolase inhibitor) + 0.138(Proto-oncogene tyrosine-protein kinase Fgr inhibitor) -0.168(Cytochrome P450 inhibitor) + 0.165(Pantetheine-phosphate adenylyltransferase inhibitor) -0.361(Contraceptive male) -0.241(Methane monooxygenase inhibitor) + 0.216(CDKN1A expression enhancer) + 0.534(Alpha glucosidase inhibitor) + 0.304(Catechol oxidase inhibitor) -0.703(Cystathionine beta-lyase inhibitor) -0.446(3-Hydroxyanthranilate oxidase inhibitor) -0.103(Antiviral (Trachoma)) -0.184(Hyponatremia) + 0.183(Glutamate (mGluR group III) agonist) -0.115(Nicotinamide phosphoribosyltransferase inhibitor) -0.135(5 Hydroxytryptamine 4E antagonist) + 0.128(PfA-M1 aminopeptidase inhibitor) -0.151(Human rhinovirus A protease inhibitor) + 0.118(Protein 30S ribosomal subunit inhibitor) + 0.357(5 Hydroxytryptamine 3A antagonist) -0.686(UDP-glucuronosyltransferase 2B7 inhibitor) -0.518(Tryptase gamma inhibitor) + 0.22(Aromatic-amino-acid transaminase inhibitor) -0.0774(GST P1-1 substrate) + 0.325(Secretase beta 1 inhibitor) -0.674(Histone deacetylase 10 inhibitor) + 0.203(Cytochrome P450 stimulant) -0.47(Glutamate (mGluR6) antagonist) -0.594(Sulfate adenylyltransferase inhibitor) + 0.397(Raf kinase C inhibitor) + 0.0945(Antitussive. narcotic) + 0.926(Deoxyguanosine kinase inhibitor) + 0.317(Envelysin inhibitor) + 0.192(STAR expression inhibitor) + 0.631(Carbonic anhydrase VIII inhibitor) + 0.502(CYP27 substrate) -0.0841(CXC chemokine 2 receptor antagonist) -0.251(FMO3 substrate) -0.184(AKR1C2 expression enhancer) -0.46(Adenosine A1 receptor antagonist) -0.171(Antitussive) -0.237(5 Hydroxytryptamine 6 antagonist) -0.559(Diacylglycerol kinase inhibitor) -0.14(Scytalone dehydratase inhibitor) -0.268(MDM2 inhibitor) + 0.18(Kinesin antagonist) -0.178(Cyclooxygenase inhibitor) -0.169(Superoxide dismutase inhibitor) + 0.351(UGT2B7 substrate) -0.0817(Polo-like kinase-2 inhibitor) -0.259(Thermitase inhibitor) -0.612(Chalcone isomerase inhibitor) + 0.0915(Baculoviral IAP repeat-containing protein 2 inhibitor) -0.385(Biliverdin reductase inhibitor) + 0.0849(AMP deaminase 3 inhibitor) -0.0978(Apolipoprotein B-100 inhibitor) -0.0869(Steroid DELTA-isomerase inhibitor) + 0.0849(Elastase 3B inhibitor) -0.197(Anesthetic inhalation) -0.235(Heat shock protein 90 antagonist) + 0.0449(Antidiabetic) + 0.363(Metalloproteinase inhibitor) + 0.0627(Antineoplastic (non-small cell lung cancer)) + 0.8(CYP27A substrate) + 0.12(Carcinogenic. rat. female. hematopoietic system) + 0.251(HCV NS3/NS4A protease inhibitor) + 0.0727(Antifungal enhancer) + 0.0811(Cystinyl aminopeptidase inhibitor) -0.185(Gonadotropin antagonist) + 0.238(Histamine H1 receptor antagonist) -0.451(CYP24 substrate) -0.0605(Ophthalmoplegia) -0.0731(Aldose reductase substrate) + 0.0904(Dysarthria) + 0.0696(G-protein-coupled receptor 120 agonist) -0.0698(Purinergic receptor antagonist) -0.138(Genotoxic) -0.223(Pemphigus) + 0.254(Anthranilate synthase inhibitor) + 0.214(GADD45B expression enhancer) -0.158(L-amino-acid oxidase inhibitor) + 0.194(3-Hydroxybutyrate dehydrogenase inhibitor) -0.0484(Antineoplastic (cervical cancer)) + 0.14(Carcinogenic. group 2A) + 0.189(Follicle-stimulating hormone antagonist) -0.161(Hair growth stimulant) -0.169(Acetoin dehydrogenase inhibitor) + 0.091(Amine dehydrogenase inhibitor) + 0.225(Prostaglandin agonist) -0.0496(Antiviral (Hepatitis C)) + 0.0582(Phosphodiesterase 6C inhibitor) + 0.192(Kinesin-like protein 1 inhibitor) -0.0522(L lactate dehydrogenase A4 inhibitor) -0.152(Thioredoxin reductase inhibitor) -0.199(Diacylglycerol cholinephosphotransferase inhibitor) + 0.0276(Antiprotozoal) + 0.0371(Dual specificity phosphatase inhibitor) -0.129(CXC chemokine 5 receptor antagonist) + 0.0365(Protein-tyrosine phosphatase 2C inhibitor) -0.0879(Beta-carotene 15.15'-monooxygenase inhibitor) -0.038(Motilin receptor agonist) -0.0336(Antibiotic Penem-like) -0.0412(5 Hydroxytryptamine 4 agonist) -0.101(CYP2B11 substrate) + 0.0391(Neuropeptide FF antagonist) + 0.05(Dependence) + 0.169(Acyl-CoA dehydrogenase (NADP+) inhibitor) -0.0344(Catalase stimulant) + 0.042(Protein kinase (PKA. PKC. AKT. GRK. AGC-related. RSK. DBF2. SGK) inhibitor) + 0.0746(Cell adhesion inhibitor) -0.038(Glycogen phosphorylase. liver form inhibitor) -0.0343(Protein-tyrosine phosphatase F inhibitor) + 0.0792(Protein-tyrosine phosphatase LC-PTP inhibitor) -0.0933(Prostaglandin E2 antagonist) + 0.0561(Inotropic) + 0.0329(Attention deficit/hyperactivity disorder treatment) + 0.0765(PGR expression enhancer) + 0.0953(Oxoglutarate dehydrogenase (lipoamide) inhibitor) + 0.0925(UGT2B17 substrate) + 0.0234(Sodium/glucose cotransporter inhibitor) -0.052(Urease inhibitor) + 0.0264(Dual specificity phosphatase 3 inhibitor) -0.0274(Fibrillation. atrial) -0.0283(Carcinogenic. rat. male. thyroid gland) + 0.13(Spermine synthase inhibitor) + 0.0753(Adenylate cyclase stimulant) + 0.0321(Psychostimulant) -0.0214(EGFR expression inhibitor) + 0.0327(Carcinogenic. rat. male. ear Zymbals gland) -0.0252(Estrogen receptor alpha antagonist) -0.0257(Aryl-acylamidase inhibitor) -0.119(Methylmalonyl-CoA mutase inhibitor) + 0.0227(TNF expression enhancer) -0.0631(KLK3 expression enhancer) + 0.0151(Potassium channel large-conductance Ca-activated activator) -0.0727(Aspartate-semialdehyde dehydrogenase inhibitor) + 0.0149(Cyclin-dependent kinase 7 inhibitor) + 0.0314(N-acetylneuraminate lyase inhibitor) + 0.00679(Antineoplastic) -0.0215(Hexokinase inhibitor) -0.00854(Sporulation kinase A inhibitor) -0.0117(GST P substrate) -0.00643(Antimitotic) + 0.00485(Neurodegenerative diseases treatment) -0.0473(Beta-1.4-mannosyl-glycoprotein 4-beta-N-acetylglucosaminyltransferase inhibitor) + 0.0199(Cyclin A inhibitor) -0.0176(UDP-N-acetylglucosamine 1-carboxyvinyltransferase inhibitor) -0.00923(Cyclin B3 inhibitor) -0.00936(MMP9 expression enhancer) + 0.00809(Saluretic) -0.00431(AMP deaminase 2 inhibitor) + 0.00298(Weight gain) + 0.00298(Carcinogenic. rat. female. urinary bladder) -0.000264(Analgesic. opioid) + 6.19

Model 44

+ 0.284(Thiopurine S-methyltransferase inhibitor) + 0.194(Acetylcholine neuromuscular blocking agent) -0.226(Aggrecanase inhibitor) + 6.71(Length) + 0.268(Miotic) -1.12(Glutamate dehydrogenase inhibitor) + 0.532(Arrhythmogenic) + 0.581(Matrix metalloproteinase 4 (membrane-type) inhibitor) -0.104(Bromodomain-containing protein 2 inhibitor) -9.91(Length^2) -0.363(Neutropenia) -0.0175(Antineoplastic (multiple myeloma)) -0.504(Serine/threonine-protein kinase WEE1 inhibitor) -0.393(Dihydropteroate synthase inhibitor) -0.85(Alpha-L-rhamnosidase inhibitor) + 0.152(NCF2 expression enhancer) + 34.6(Volume) -0.262(Nephrotoxic) -0.517(Oxytocin agonist) + 0.234(Carcinogenic. rat. male. kidney) -0.444(Prostaglandin-I synthase inhibitor) + 0.489(Convulsant) + 12(Volume^3) -0.306(Tumour necrosis factor alpha antagonist) -0.673(Antiuremic) + 0.544(Estrogen alpha receptor agonist) -0.617(Glutathione S-transferase substrate) -37.6(Volume^2) + 0.0211(Equilibrative nucleoside transport protein inhibitor) -0.532(CYP2 substrate) + 0.367(Anticataract) -0.404(HSPA8 expression inhibitor) -0.907(Hyperthermic) -0.195(Protein-tyrosine phosphatase 1B inhibitor) + 0.21(Histone deacetylase stimulant) -0.263(Acute neurologic disorders treatment) + 0.572(Anemia) + 0.431(Cytosolic phospholipase A2 beta inhibitor) + 0.161(CYP2D substrate) -0.461(NGFR expression enhancer) -0.292(Metalloproteinase-9 inhibitor) + 0.0555(Sodium/calcium exchanger 1 inhibitor) + 0.836(Chorismate mutase inhibitor) -1.01(Cyclic AMP modulator) + 0.498(Carcinogenic. rat. female. vascular system) + 1.04(Fatty acid binding protein inhibitor) -0.278(Alkylator) -1.56(Low molecular weight phosphotyrosine protein phosphatase inhibitor) -0.453(Dermatitis) + 0.313(CAT expression inhibitor) + 0.658(Procollagen-lysine 5-dioxygenase inhibitor) + 0.426(Dyslipidemia) -0.525(Protein phosphatase 2A inhibitor) + 0.613(CYP2G1 substrate) + 0.0426(NACHT. LRR and PYD domains-containing protein 3 inhibitor) + 0.243(FABP1 expression enhancer) + 0.466(Dyskinesia) + 0.562(Imidazoline I2 receptor antagonist) + 0.388(Antifungal) -1.21(Phosphoserine phosphatase inhibitor) + 0.239(Antineoplastic (colorectal cancer)) -0.247(Antimycobacterial) -0.432(MAO A inhibitor) + 0.2(Myocarditis) -1.11(5 Hydroxytryptamine 2A agonist) + 0.47(Trypsin II inhibitor) + 0.489(Glycogen synthase kinase-3 inhibitor) -0.206(Prostate disorders treatment) + 0.42(Psychoses) -0.622(Histone deacetylase 4 inhibitor) + 0.0115(Prostaglandin H2 antagonist) + 0.302(Dependence) -0.467(Ribosomal protein S6 kinase alpha 3 inhibitor) -0.494(Glutamate (mGluR5) agonist) -0.882(Phosphogluconate dehydrogenase (decarboxylating) inhibitor) -0.384(Steroid 17-alpha-hydroxylase/17.20 lyase inhibitor) + 0.912(Granulocyte macrophage colony stimulating factor agonist) + 0.488(Phosphate acetyltransferase inhibitor) -0.0151(Allergic dermatitis) + 0.552(Adenosylmethionine-8-amino-7-oxononanoate transaminase inhibitor) -1.13(Antineoplastic antimetabolite) + 0.257(Antiseborrheic) -0.315(Methemoglobinemia) + 0.128(Liver cirrhosis treatment) + 0.324(Ceramide glucosyltransferase inhibitor) + 0.282(Endometrios treatment) + 0.219(cAMP-dependent protein kinase beta catalytic subunit inhibitor) + 0.427(Carcinogenic. rat. male. lung) + 0.416(15-Lipoxygenase inhibitor) + 0.298(CDKN1A expression enhancer) -0.57(Carcinogenic. mouse. female) -0.15(Analgesic) -0.317(Antiacne) -0.302(Polyadenylate-binding protein 1 inhibitor) + 0.254(Rho-associated kinase inhibitor) -0.395(Matrix metalloproteinase 1 (membrane-type) inhibitor) -0.168(Phosphodiesterase X inhibitor) -0.293(Tardive dyskinesia treatment) -0.399(Renin inhibitor) -0.524(Glycine C-acetyltransferase inhibitor) + 0.301(Interleukin 1 antagonist) + 1.13(Thymidine kinase (Herpes simplex virus 2) inhibitor) + 0.126(DNA helicase inhibitor) -0.792(Acid phosphatase inhibitor) -0.284(Kinase inhibitor) -0.256(Homoserine O-acetyltransferase inhibitor) -0.252(Prostate cancer treatment) -1.53(Polynucleotide 5'-hydroxy-kinase inhibitor) -1.1(Histidine decarboxylase inhibitor) + 0.595(Diuretic inhibitor) + 0.269(Cruzipain inhibitor) + 0.415(Peroxisome proliferator-activated receptor alpha antagonist) + 0.396(Spermicide) + 0.381(Sulfinoalanine decarboxylase inhibitor) + 0.335(Tyrosine-ester sulfotransferase inhibitor) + 0.455(Anesthetic local) -0.295(Amiloride-sensitive cation channel 1 blocker) + 0.346(Adrenergic) -1.35(Glycerate kinase inhibitor) -1.18(Peptidyl-prolyl cis-trans isomerase inhibitor) -0.212(KPNB1 expression inhibitor) + 0.281(Uterine relaxant) + 0.406(3-Deoxy-7-phosphoheptulonate synthase inhibitor) + 0.295(Allergic reaction) + 0.236(Purinergic P2X4 antagonist) -0.291(HCV NS5B polymerase inhibitor) -0.737(NOS2 expression inhibitor) -0.321(Cyclin D3 inhibitor) + 0.229(Death-associated protein kinase inhibitor) + 0.162(Angiogenesis stimulant) -0.72(Oxytocin antagonist) -0.474(Cholesterol antagonist) + 0.287(Proto-oncogene protein c-fos inhibitor) + 0.256(Pyrimidine antagonist) -0.789(IFITM1 expression enhancer) + 0.339(Oxaloacetate decarboxylase inhibitor) -0.888(Photinus-luciferin 4-monooxygenase (ATP-hydrolysing) inhibitor) + 0.538(GSTP1 expression enhancer) + 0.323(Antineurogenic pain) + 0.755(CYP24A1 expression enhancer) -0.184(Teratogen) + 1.09(Cathepsin D inhibitor) -0.428(Glycogen synthase kinase-3 alpha inhibitor) + 0.492(Cardiodepressant) -0.808(Estrogen-related receptor alpha antagonist) + 0.69(Phosphofructokinase-1 inhibitor) + 0.347(Phosphodiesterase VII inhibitor) + 0.796(Arachidonic acid antagonist) + 0.467(Calcium channel activator) + 0.377(Bulimia treatment) + 0.612(CYP11B1 inhibitor) + 0.247(CYP26A1 inhibitor) -0.274(Potassium channel intermediate-conductance Ca-activated 4 blocker) -0.0317(SERPINA3 expression enhancer) -0.688(Aspartate carbamoyltransferase inhibitor) -0.144(Thymidine kinase 2 inhibitor) + 0.828(Ribose-5-phosphate isomerase inhibitor) + 0.452(Glutathione-disulfide reductase inhibitor) + 0.164(Alpha galactosidase inhibitor) -0.532(Purine nucleoside phosphorylase inhibitor) + 0.248(Opioid kappa receptor agonist) -0.752(Peptidylglycine monooxygenase inhibitor) -0.502(Cystic fibrosis treatment) -0.641(5 Hydroxytryptamine 2 agonist) -0.254(Lysophosphatidic acid 2 receptor antagonist) + 0.241(Ribosomal protein S6 kinase 2 inhibitor) + 1.22(CMP-N-acylneuraminate phosphodiesterase inhibitor) + 0.221(Phosphodiesterase 6H inhibitor) + 0.536(Sickle-cell anemia treatment) -0.12(Topoisomerase II inhibitor) + 0.193(Bone formation stimulant) + 1.04(Somatostatin 2 antagonist) -0.847(Calpain 1 inhibitor) + 0.467(DNA ligase (ATP) inhibitor) + 1.02(Peptide deformylase inhibitor) + 0.276(Diaminopropionate ammonia-lyase inhibitor) -0.218(24-sterol C-methyltransferase inhibitor) + 0.262(UDP-N-acetylmuramate-L-alanine ligase inhibitor) -0.251(Alpha.alpha-trehalose phosphorylase (configuration-retaining) inhibitor) -0.239(Transcription factor E2F1 inhibitor) -0.251(Rhinitis) + 0.791(NMDA receptor subunit 3A antagonist) -0.419(Arylamine N-Acetyltransferase substrate) + 0.737(Amylin agonist) -0.211(Homoserine kinase inhibitor) -0.228(Prostacyclin antagonist) -0.642(UGT1A1 substrate) -0.281(CD86 expression enhancer) -0.207(MAP kinase 7 inhibitor) -0.22(Cyclin B1 inhibitor) -0.889(3(or 17)beta-hydroxysteroid dehydrogenase inhibitor) -0.546(Dihydroorotate oxidase inhibitor) + 0.22(Pantetheine-phosphate adenylyltransferase inhibitor) -0.411(Contraceptive) + 8.45(Length^3) -0.177(Galactorrhea) -0.679(Arginase inhibitor) + 0.387(CYP1A1 expression inhibitor) + 0.249(Protocollagen prolyl hydroxylase inhibitor) -0.207(Sigma 1 receptor agonist) -0.544(Thrombin inhibitor) + 0.888(MAP3K11 inhibitor) + 0.531(GABA A receptor agonist) + 0.433(MAP kinase kinase inhibitor) -0.41(Dopamine D1 antagonist) + 0.25(Ulcer. gastric) + 0.192(Dopamine D3 antagonist) -0.583(AMPA 1 receptor antagonist) -0.163(GHS receptor antagonist) + 0.666(3.4-Dihydroxyphenylacetate 2.3-dioxygenase inhibitor) + 0.372(Phosphomannomutase inhibitor) + 0.449(Kinesin-like protein 1 inhibitor) + 0.468(Leukotriene C4 antagonist) + 0.287(Pectin lyase inhibitor) + 0.283(Galanin receptor antagonist) + 0.167(SOX4 expression inhibitor) -0.218(PPARG expression enhancer) + 0.143(Protein kinase B gamma inhibitor) + 0.145(Enoyl-[acyl-carrier-protein] reductase inhibitor) -0.626(CYP1B1 inhibitor) -0.322(Linoleate diol synthase inhibitor) + 0.178(TNF expression enhancer) + 0.512(Phosphatidate cytidylyltransferase inhibitor) + 0.406(Prephenate dehydrogenase inhibitor) -0.421(Thioredoxin reductase inhibitor) + 0.4(IL1A expression enhancer) -0.18(Fibrillation. atrial) -0.365(Sn1-specific diacylglycerol lipase alpha inhibitor) -0.503(5-Formyltetrahydrofolate cyclo-ligase inhibitor) -0.122(Angiotensin II receptor antagonist) -0.161(Ribosomal protein S6 kinase alpha 4 inhibitor) -0.764(Thyroid hormone beta antagonist) + 0.467(Adenosine A2b receptor antagonist) + 0.22(Female germline-specific tumor suppressor gld-1 inhibitor) -0.167(Nonstructural protein 1 (Influenza A) inhibitor) -0.147(Glycine receptor agonist) + 0.223(Antiprotozoal (Coccidial)) + 0.457(Collagenase inhibitor) -0.442(5 Hydroxytryptamine 4 antagonist) + 0.0783(DNA topoisomerase IV inhibitor) -0.203(Obsessive-compulsive disorder treatment) -0.112(RNA directed DNA polymerase inhibitor) -0.199(Gastrin inhibitor) + 0.449(CMP-N-acetylneuraminate monooxygenase inhibitor) -0.121(Tubulin agonist) + 0.0798(Antiviral (HIV)) + 0.354(Antipruritic. non-allergic) + 0.108(Interleukin 5 antagonist) + 0.436(Aryl hydrocarbon receptor antagonist) + 0.0965(AMP deaminase 3 inhibitor) + 0.14(Prostaglandin E2 agonist) + 0.239(Alkaline phosphatase inhibitor) + 0.259(Anticarcinogenic) + 0.113(Estrone sulfotransferase stimulant) + 0.2(Dependence treatment) + 0.321(Acetyl-CoA carboxylase inhibitor) -0.315(NF-kappa-B essential modulator inhibitor) + 0.145(ABCC2 expression enhancer) -0.088(Nicotinic acid receptor 1 agonist) -0.43(Glycerol-3-phosphate O-acyltransferase inhibitor) + 0.143(Carcinogenic. mouse. female. liver) + 0.338(Chelator. Iron) -0.1(Prostaglandin F2 alpha antagonist) -0.0927(CDC25 phosphatase inhibitor) + 0.0878(Cholestenone 5alpha-reductase inhibitor) -0.115(MAP kinase 13 inhibitor) + 0.0882(Alpha-L-fucosidase 1 inhibitor) + 0.0897(Pim-2 kinase inhibitor) + 0.0592(Antifungal enhancer) + 0.195(CYP2D6 substrate) + 0.0887(Protein 50S ribosomal subunit inhibitor) + 0.206(Antiviral (CMV)) -0.154(Aldehyde oxidase substrate) -0.0555(Purinergic P2 antagonist) -0.111(CYP2C9 inducer) + 0.265(UGT2B17 substrate) + 0.202(UGT1A5 substrate) + 0.156(Tryptophan 2-monooxygenase inhibitor) + 0.0472(Renal disease treatment) + 0.196(Urotensin II agonist) -0.295(UDP-glucuronosyltransferase 2B7 inhibitor) + 0.3(Aminolevulinate transaminase inhibitor) -0.25(Proteasome subunit beta type-8 inhibitor) -0.17(MAP3K8 inhibitor) + 0.152(Protein kinase B stimulant) -0.311(Glucan 1.4-alpha-glucosidase inhibitor) -0.134(SQLE expression inhibitor) -0.145(Cyclooxygenase inhibitor) -0.19(Integrin alpha2beta1 antagonist) + 0.115(Galactose oxidase inhibitor) -0.214(KLK3 expression enhancer) + 0.0554(ErbB-1 antagonist) + 0.197(Phosphoenolpyruvate carboxykinase (ATP) inhibitor) + 0.0653(5 Hydroxytryptamine 2A antagonist) -0.0713(Hyperkinesia) + 0.054(Proteasome subunit beta type-5 inhibitor) -0.0567(TNF convertase inhibitor) -0.0738(CYP3A5 substrate) -0.314(Amidophosphoribosyltransferase inhibitor) + 0.117(SELENBP1 expression inhibitor) + 0.0624(Hypnotic) + 0.0444(Benzodiazepine inverse agonist) + 0.0645(Neutrophil collagenase inhibitor) + 0.107(Phospholipase A2 inhibitor) -0.0584(Antiinfective) -0.0489(Bradykinin B1 receptor antagonist) -0.0533(Aminopeptidase A inhibitor) -0.0499(Cardiovascular analeptic) -0.148(Melatonin 2 agonist) + 0.0639(BCL2 expression inhibitor) -0.0381(SLC5A5 expression enhancer) -0.067(Peroxisome proliferator-activated receptor delta antagonist) + 0.0676(Saluretic) -0.0533(Hyponatremia) + 0.15(L lactate dehydrogenase A inhibitor) + 0.0847(Gamma-butyrobetaine dioxygenase inhibitor) + 0.0328(Sentrin-specific protease 8 inhibitor) -0.0874(Lactoylglutathione lyase inhibitor) + 0.0366(Coma) -0.144(Kainate receptor agonist) + 0.0343(Dopamine D1 agonist) + 0.0304(Fibroblast growth factor 3 antagonist) + 0.082(Sphingosine 1-phosphate receptor 3 agonist) + 0.0342(Phosphatidylserine decarboxylase inhibitor) + 0.0655(DNA directed DNA polymerase inhibitor) -0.0634(Potassium channel (Voltage-sensitive) activator) + 0.0765(K(ir) 6.1 channel blocker) -0.0819(Glutamate synthase (ferredoxin) inhibitor) -0.0186(Antiviral (Hepatitis C)) -0.0465(Carcinogenic. rat. male. vascular system) -0.021(Carbonic anhydrase II stimulant) + 0.0533(CD14 expression enhancer) + 0.0171(Antiprotozoal (Toxoplasma)) + 0.0569(Nerve growth factor antagonist) -0.0564(YAK3 inhibitor) -0.0578(NRIP1 expression enhancer) + 0.0743(NAD+ nucleosidase inhibitor) + 0.0455(AR expression inhibitor) -0.0537(Beta lactamase II inhibitor) + 0.0393(Prostaglandin-E synthase inhibitor) -0.0359(Janus tyrosine kinase 3 inhibitor) -0.0497(NOS3 expression inhibitor) -0.0133(Selectin antagonist) -0.0257(Cathepsin S inhibitor) -0.0135(Angiotensin-converting enzyme 2 inhibitor) -0.00979(Urokinase inhibitor) + 0.0354(CCL20 expression enhancer) -0.0279(Apyrase inhibitor) -0.0115(SCD expression enhancer) + 0.00418(Inflammatory Bowel disease treatment) + 0.00475(Antineoplastic (melanoma)) -0.0124(Carcinogenic. rat. male. oral cavity) + 0.0144(Prion diseases treatment) -0.0134(Free radical scavenger) + 0.00492(GCLC expression enhancer) + 0.00214(Antiobesity) -0.00258(Lysophosphatidic acid 3 receptor antagonist) + 0.00554(CCND1 expression enhancer) -0.00598(Sphingosine kinase inhibitor) + 0.00125(Antiviral (Hepatitis B)) + 0.00457(Carbonic anhydrase inhibitor) -0.00184(BAD expression inhibitor) + 0.000589(CYP2C18 substrate) + 0.000551(Restless leg syndrome treatment) + 5.79

Model 45

-0.297(Cytosol alanyl aminopeptidase inhibitor) + 0.07(Toxic. respiratory center) + 9.12(Length) + 1.78(NOS2 expression enhancer) -0.133(HIV-1 integrase (3'-Processing) inhibitor) -0.0806(Mydriatic) -0.955(Leukopenia) -1.69(Lysozyme inhibitor) -0.589(Phosphodiesterase 1B inhibitor) -0.122(MAP kinase kinase 2 inhibitor) + 0.572(Arrhythmogenic) + 0.273(Respiratory distress syndrome treatment) -11.3(Length^2) -0.949(CYP3A4 inducer) + 0.0892(Superoxide dismutase inhibitor) -1.23(5 Hydroxytryptamine 2A agonist) + 0.0762(Anticoagulant) + 0.965(Nucleotidyltransferase (FIV) inhibitor) -0.387(Steroid 17-alpha-hydroxylase/17.20 lyase inhibitor) + 0.201(MAP-kinase-activated kinase inhibitor) + 0.114(8-oxodGTPase stimulant) -1.77(Amylo-alpha-1.6-glucosidase inhibitor) + 0.692(Tremor) + 0.532(Protein-tyrosine sulfotransferase inhibitor) -0.492(Integrin beta3 antagonist) + 33.4(Volume) + 0.252(cAMP-dependent protein kinase beta catalytic subunit inhibitor) + 0.283(Magnesium-protoporphyrin IX methyltransferase inhibitor) -36.8(Volume^2) -0.666(Glutathione S-transferase substrate) -0.577(Carcinogenic) -0.305(Malate dehydrogenase (oxaloacetate-decarboxylating) (NADP+) inhibitor) -1.17(Antineoplastic antimetabolite) + 0.398(UDP-N-acetylmuramate-L-alanine ligase inhibitor) + 17.7(Volume^3) + 0.948(MYC expression enhancer) + 0.425(15-Lipoxygenase 2 inhibitor) -0.402(Purinergic P2 antagonist) + 0.246(Alpha 2 adrenoreceptor antagonist) + 0.192(Antidiabetic symptomatic) + 0.232(Ca2+/calmodulin-dependent kinase I alpha inhibitor) -0.995(Photinus-luciferin 4-monooxygenase (ATP-hydrolysing) inhibitor) -0.263(Serine/threonine-protein kinase MRCK-A inhibitor) -0.391(Prostaglandin F2 alpha antagonist) -0.555(Protein kinase C beta I inhibitor) + 0.475(Immunosuppressant) + 0.0156(SLC3A2 expression enhancer) -0.349(Glycine receptor agonist) + 0.319(Phosphodiesterase 11A inhibitor) -0.503(Antimetastatic) -0.413(Immunomodulator) -0.866(UGT1A3 substrate) -0.442(Adenosine uptake inhibitor) + 0.863(CYP2G1 substrate) + 0.898(S-adenosyl-L-methionine decarboxylase inhibitor) -0.407(NADPH oxidase 4 inhibitor) -0.551(Phosphodiesterase 8B inhibitor) + 0.589(Acetylcholine neuromuscular blocking agent) + 0.323(Integrin alpha1beta1 antagonist) -0.0854(Opioid kappa receptor antagonist) + 0.417(Peroxisome proliferator-activated receptor alpha antagonist) + 0.246(Inositol 1.4.5-triphosphate receptor 1 antagonist) + 0.796(Follicle-stimulating hormone antagonist) + 0.488(Galactose oxidase inhibitor) + 0.28(Myocarditis) + 0.709(CYP4B substrate) + 0.829(Alpha-L-fucosidase inhibitor) + 0.396(CYP1A1* substrate) + 0.171(Sodium/glucose cotransporter 2 inhibitor) -0.287(Prostacyclin antagonist) + 0.181(Liver cirrhosis treatment) + 0.18(Antineoplastic alkaloid) -0.387(AKR1C2 expression enhancer) -0.426(Epithelial sodium channel blocker) + 0.471(Ribosomal protein S6 kinase. 70-kDa inhibitor) -0.358(cAMP-dependent protein kinase type II-beta regulatory subunit inhibitor) -0.302(Cyclooxygenase 3 inhibitor) -0.343(Antimycobacterial) -0.45(EDN1 expression enhancer) -0.319(Matrix metalloproteinase (membrane-type) inhibitor) -1.43(Vitamin) -0.304(Coccolysin inhibitor) -0.488(Phosphodiesterase II inhibitor) -0.291(Antidyskinetic) + 0.287(Antifungal) + 0.427(Anemia) -0.274(Epstein-Barr nuclear antigen 1 inhibitor) -1.05(Indanol dehydrogenase inhibitor) + 0.139(NMDA receptor glutamate site antagonist) -0.149(Antihypertensive) -0.599(Akinesia) + 0.752(Peptide deformylase inhibitor) -0.69(Potassium channel Kv4.3 blocker) -0.485(Chymotrypsin inhibitor) + 0.601(Imidazoline I2 receptor antagonist) + 0.459(Calcium channel blocker) + 0.275(STAR expression inhibitor) + 1.19(Riboflavin synthase inhibitor) + 0.273(Carbonic anhydrase VB inhibitor) + 0.431(Nav1.8 sodium channel blocker) + 1(Alanine dehydrogenase inhibitor) -0.331(CYP2B1 substrate) + 0.285(ATP-binding cassette G2 inhibitor) + 0.296(MAP kinase kinase 7 inhibitor) -0.217(Hypogonadism treatment) + 0.202(Antineoplastic (colon cancer)) -0.437(Protein Wnt-2 inhibitor) + 0.406(Plasminogen activator inhibitor antagonist) + 0.828(Nuclear factor of activated T-cells cytoplasmic 2 inhibitor) -0.369(Aspartate 4-decarboxylase inhibitor) + 0.126(Macrophage colony-stimulating factor 1 receptor antagonist) -0.65(Glutamate synthase (ferredoxin) inhibitor) -0.831(Prolyl endopeptidase inhibitor) -0.242(Neurotrophic factor) -0.154(Antiviral (Hepatitis)) + 0.147(Alzheimer's disease treatment) + 0.178(Protein-tyrosine phosphatase 2C inhibitor) + 0.142(Catenin beta inhibitor) -0.222(Calcium channel T-type blocker) + 0.194(Neurokinin 3 antagonist) -1.4(Amidophosphoribosyltransferase inhibitor) + 0.467(3-Hydroxybutyrate dehydrogenase inhibitor) + 0.32(Arylamine N-acetyltransferase inhibitor) + 0.452(GABA receptor agonist) -0.593(Xanthine phosphoribosyltransferase inhibitor) -0.288(Vascular endothelial growth factor 3 antagonist) -0.769(Dihydroorotate oxidase inhibitor) + 0.453(CDKN1C expression enhancer) -0.573(Free fatty acid receptor 1 agonist) + 0.257(Caspase 9 inhibitor) -0.468(DNA-(apurinic or apyrimidinic site) lyase inhibitor) + 0.135(N-Acetylated alpha-linked acidic dipeptidase inhibitor) + 0.887(P3 purinoceptor-like protein antagonist) -0.511(Obsessive-compulsive disorder treatment) + 0.134(Sterol 24-C-methyltransferase inhibitor) -0.502(Guanidinoacetate kinase inhibitor) + 0.203(Protein kinase C delta inhibitor) + 1.2(Procollagen-proline 3-dioxygenase inhibitor) -0.191(TGFA expression enhancer) + 0.475(Glycosoaminoglycans antagonist) + 0.44(Adenylate cyclase V inhibitor) + 0.79(Guanylate kinase inhibitor) + 0.193(Antianemic) + 0.535(Carbonic anhydrase VA inhibitor) -0.385(Cyclomaltodextrin glucanotransferase inhibitor) + 0.25(Beta adrenoreceptor antagonist) + 0.334(Sphingosine 1-phosphate receptor 3 agonist) -0.57(Dual specificity tyrosine-phosphorylation regulated kinase 1B inhibitor) + 0.802(1-Pyrroline-5-carboxylate dehydrogenase inhibitor) + 0.17(Anesthetic) + 0.261(Clk dual-specificity kinase inhibitor) -0.309(Ribosomal protein S6 kinase. 90-kDa inhibitor) + 0.189(5 Hydroxytryptamine 1F antagonist) -0.525(Potassium channel (Voltage-sensitive) activator) + 0.398(MMP2 expression inhibitor) -0.719(NRIP1 expression enhancer) + 0.153(Integrin antagonist) -0.557(Serine-phosphoethanolamine synthase inhibitor) + 0.182(K(Ca) 3.1 channel blocker) -0.171(Carbonic anhydrase II stimulant) -0.186(Drowsiness) -0.204(Carbonic anhydrase IX inhibitor) + 0.313(Antiviral (CMV)) + 0.811(Uridine nucleosidase inhibitor) + 0.109(Growth hormone agonist) -0.107(TRPA1 antagonist) + 0.0963(Antiobesity) + 0.12(Alpha 2c adrenoreceptor agonist) + 0.292(Membrane permeability enhancer) + 0.429(Somatostatin 4 antagonist) -1.3(Procollagen galactosyltransferase inhibitor) -0.375(SQLE expression inhibitor) + 0.166(Chorea) -0.319(Thioredoxin reductase inhibitor) + 0.187(Dementia treatment) -0.384(Shaker potassium channel blocker) + 0.211(Nucleotide-binding oligomerization domain-containing protein 1 inhibitor) -0.337(Gastrointestinal motility stimulant) + 0.336(Transcription factor NF kappa B2 inhibitor) -0.234(Opioid mu receptor antagonist) -0.156(Hypertensive) + 0.14(ATP-dependent RNA helicase inhibitor) -0.219(Potassium channel intermediate-conductance Ca-activated blocker) + 0.0698(C10ORF10 expression enhancer) + 0.168(Estrogen agonist) + 0.338(Hypercalcaemic) + 0.283(IL4 expression enhancer) -0.85(Inositol-3-phosphate synthase inhibitor) + 0.321(Indoleamine-pyrrole 2.3-dioxygenase inhibitor) + 0.485(Carbonic anhydrase II inhibitor) -0.403(5 Hydroxytryptamine 6 antagonist) -0.272(Oxytocin agonist) -0.37(S100P expression enhancer) + 0.136(Opioid kappa receptor agonist) -0.109(Farnesyltransferase. putative inhibitor) + 0.112(Death-associated protein kinase 3 inhibitor) -0.111(Arylsulfatase inhibitor) -0.0646(Stroke treatment) -0.24(Hypercholesterolemic) -0.15(Endothelin A receptor antagonist) -0.222(Lactate 2-monooxygenase inhibitor) -0.106(Kainate receptor 2 antagonist) + 0.0928(Chronic obstructive pulmonary disease treatment) -0.155(MAP kinase 13 inhibitor) + 0.151(Phosphodiesterase 6G inhibitor) + 0.0924(FABP1 expression enhancer) + 0.189(N-carbamoyl-L-amino-acid hydrolase inhibitor) -0.39(Dihydrofolate synthase inhibitor) + 4.42(Length^3) -0.39(Protein C (activated) inhibitor) + 0.0993(Ileal bile acid transport inhibitor) + 0.431(Cytosine deaminase inhibitor) + 0.281(Alanine transaminase inhibitor) -0.269(L-amino-acid oxidase inhibitor) + 0.199(I kappa B kinase inhibitor) + 0.121(Sucrose-phosphate synthase inhibitor) + 0.116(Sentrin-specific protease 8 inhibitor) -0.117(Retinoic acid receptor antagonist) + 0.334(Narcotic antagonist) + 0.495(Atrolysin A inhibitor) -0.287(CYP3A4 expression enhancer) + 0.134(Muscle weakness) -0.154(Kruppel-like factor 5 inhibitor) + 0.281(Leukotriene antagonist) + 0.185(TP53 expression enhancer) -0.126(Carcinogenic. rat. male) -0.283(Purine biosynthesis inhibitor) + 0.243(Nicotinic receptor alpha7 subunit antagonist) -0.273(CXC chemokine 4 receptor antagonist) + 0.147(Pancytopenia) + 0.218(APOBEC-3G inhibitor) -0.139(Phosphodiesterase V inhibitor) + 0.13(Photoallergy dermatitis) -0.105(Phosphatidylinositol kinase inhibitor) -0.0861(Hexokinase stimulant) + 0.203(BID expression inhibitor) + 0.235(D-lactaldehyde dehydrogenase inhibitor) + 0.118(Paralysis) -0.0515(Neuronal K-Cl cotransporter inhibitor) + 0.0976(Janus tyrosine kinase 1 inhibitor) + 0.0742(Antineoplastic (bone cancer)) + 0.219(KLK3 expression inhibitor) + 0.0549(Systemic lupus erythematosus treatment) + 0.486(Somatostatin antagonist) -0.0883(Tyrosine kinase non-receptor protein 2 inhibitor) + 0.0877(Nausea) -0.158(Catechol 1.2-dioxygenase inhibitor) -0.103(Histamine release inhibitor) + 0.19(Endothelial nitric-oxide synthase inhibitor) -0.076(17-Beta-hydroxysteroid dehydrogenase 1 inhibitor) -0.116(FMO3 substrate) + 0.116(NADPH oxidase inhibitor) -0.086(Hypotonia) -0.173(L-Serine ammonia-lyase inhibitor) -0.222(UDP-3-O-acyl-N-acetylglucosamine deacetylase inhibitor) + 0.0756(Weight gain) -0.0656(5 Hydroxytryptamine 1F agonist) -0.0449(Antineoplastic (lymphocytic leukemia)) -0.183(Diamine oxidase inhibitor) + 0.0506(Substance P antagonist) -0.0868(Gastrointestinal hemorrhage) + 0.0268(Apoptosis agonist) + 0.183(Human papillomavirus - 16 inhibitor) -0.0425(Purine antagonist) + 0.128(Inosine monophosphate dehydrogenase 2 inhibitor) + 0.138(NAT1 substrate) -0.146(Inositol monophosphatase inhibitor) + 0.225(Inositol 1.4.5-triphosphate receptor antagonist) + 0.0512(Rho-associated kinase I inhibitor) + 0.0561(Vascular endothelial growth factor 1 antagonist) -0.0417(Bisphosphonate) -0.124(Histone deacetylase class IIa inhibitor) + 0.0441(CDC7 inhibitor) -0.117(Sn1-specific diacylglycerol lipase alpha inhibitor) -0.128(Glutamate (mGluR6) antagonist) -0.0949(MAP kinase kinase 4 inhibitor) + 0.0849(TXNRD1 expression enhancer) + 0.103(Peroxisome proliferator-activated receptor gamma antagonist) -0.0513(Transforming growth factor beta antagonist) -0.221(Adenylosuccinate lyase inhibitor) -0.0888(EGR3 expression enhancer) -0.0362(Retinoic acid alpha receptor agonist) -0.064(Matrix metalloproteinase 3 (membrane-type) inhibitor) -0.0411(Platelet growth factor antagonist) -0.0806(Glycine hydroxymethyltransferase inhibitor) -0.0247(T cell receptor antagonist) + 0.0288(TRKB antagonist) + 0.0432(Hypersexuality) + 0.0259(Protease inhibitor) -0.0204(Hemozoin inhibitor) + 0.0778(Phosphodiesterase XI inhibitor) -0.0394(ESR1 expression inhibitor) -0.0248(Check point kinase inhibitor) + 0.0154(Transglutaminase 2 inhibitor) -0.0197(T cell receptor gamma-delta antagonist) + 0.0298(CDKN1A expression enhancer) -0.0133(Antineoplastic (glioblastoma multiforme)) -0.0421(Oxytocin antagonist) + 0.0428(MAP kinase kinase inhibitor) + 0.0127(Glutamate (mGluR) agonist) -0.0361(CDK5/p25 inhibitor) -0.0152(Sphingosine 1-phosphate receptor 5 antagonist) -0.0322(CC chemokine 10 receptor antagonist) -0.0161(Ribosomal protein S6 kinase alpha 5 inhibitor) + 0.0185(CYP3A1 substrate) + 0.0447(Ribonucleotide reductase inhibitor) + 0.0107(Dihydrofolate reductase (Toxoplasma gondii) inhibitor) + 0.0144(Carbonic anhydrase I stimulant) -0.0117(Polo-like kinase inhibitor) + 0.0354(Gastricsin inhibitor) + 0.0297(Cellulose 1.4-beta-cellobiosidase inhibitor) + 0.00686(Vitamin D3 hydroxylase inhibitor) -0.0224(Cyclooxygenase substrate) -0.00925(HSPA5 expression enhancer) + 0.00458(Runt-related transcription factor 1 inhibitor) + 0.00549(Glutamate (mGluR8) antagonist) -0.0239(Histidine-tRNA ligase inhibitor) -0.00404(Follicle-stimulating hormone agonist) -0.00567(Alpha 1L adrenoreceptor antagonist) + 0.0128(CXC chemokine L1/GRO-alpha antagonist) + 0.00198(Dipeptidyl peptidase IV inhibitor) + 5.92

Model 46

-0.0688((R)-3-amino-2-methylpropionate-pyruvate transaminase inhibitor) + 0.161(Dysphoria) + 0.0187(Amyloid beta precursor protein antagonist) + 9.8(Length) -0.0669(Cholinergic) -0.385(Agranulocytosis) + 0.0119(Ocular toxicity) + 0.69(NOS2 expression enhancer) -1.1(Phosphoribulokinase inhibitor) -0.742(CYP3A inducer) -10.6(Length^2) -1.35(Thrombin inhibitor) + 0.508(Lipid metabolism regulator) -0.31(Antiulcerative) -0.339(Glycine receptor agonist) + 0.325(Respiratory distress syndrome treatment) + 0.499(Dyskinesia) -0.00974(Metalloproteinase-9 inhibitor) -1.03(DNA synthesis inhibitor) + 1.01(3-Deoxy-7-phosphoheptulonate synthase inhibitor) + 0.288(Vasodilator. peripheral) + 0.0191(Asparaginyl endopeptidase inhibitor) + 0.431(Arrhythmogenic) -34(Volume^2) + 30.9(Volume) -0.517(Akinesia) -0.288(Purinergic receptor antagonist) + 1.8(Calmodulin-domain protein kinase 1 inhibitor) + 0.563(Corticosteroid-like) + 0.692(Gynecological disorders treatment) -0.555(Lysozyme inhibitor) + 16.3(Volume^3) -0.923(Antiacne) + 0.559(Alpha galactosidase inhibitor) -0.404(Phosphodiesterase VIII inhibitor) -0.32(Melatonin 2 antagonist) + 0.259(Alpha 2c adrenoreceptor agonist) -0.515(Endocrine disruptor) + 0.264(Trypsin II inhibitor) + 0.948(Spermine synthase inhibitor) -0.894(CYP24 substrate) + 0.476(Cytosolic phospholipase A2 inhibitor) -0.763(Photinus-luciferin 4-monooxygenase (ATP-hydrolysing) inhibitor) -0.0273(Macrophage elastase inhibitor) + 2.08(Methionyl aminopeptidase 1 inhibitor) -0.975(Dizziness) + 0.0769(Alcohol dehydrogenase I inhibitor) + 0.0751(Psychotropic) + 0.378(Cytochrome P450 stimulant) + 0.687(Ribosomal protein S6 kinase 1. 70-kDa inhibitor) -0.238(TRPA1 antagonist) -0.281(Paraplegia) -0.0916(Electron transport complex I inhibitor) + 0.333(CYP1A1* substrate) -0.63(Beta lactamase inhibitor) + 0.277(Glyceryl-ether monooxygenase inhibitor) -0.0174(Antiosteoporotic) -1.32(Diacylglycerol kinase inhibitor) + 0.792(IL4 expression enhancer) -0.217(Fibroblast growth factor 4 antagonist) + 0.507(Inosine monophosphate dehydrogenase 1 inhibitor) -0.363(Cyclin H inhibitor) + 0.054(Acetolactate decarboxylase inhibitor) + 0.481(Glycolipid 3-alpha-mannosyltransferase inhibitor) -0.32(Beta-ureidopropionase inhibitor) + 0.128(Lysyl endopeptidase inhibitor) + 0.314(Carcinogenic. rat. male. stomach) -0.434(Carcinogenic. mouse. female) -1.32(Neuropathy treatment) + 0.26(Urologic disorders treatment) + 0.977(Amylin agonist) + 0.18(Xanthine-like) + 0.603(Diabetic neuropathy treatment) + 0.173(CYP3A5 expression enhancer) + 0.205(Caspase 7 inhibitor) -0.456(Keratolytic) -0.551(Thromboxane synthase inhibitor) + 0.789(Glutamate decarboxylase inhibitor) -0.165(HIV-1 integrase (Strand Transfer) inhibitor) + 0.231(NAD(P)+ transhydrogenase (AB-specific) inhibitor) -0.27(Ribosomal protein S6 kinase alpha 1 inhibitor) -0.331(Mydriatic) -0.3(2.3-Oxidosqualene-lanosterol cyclase inhibitor) + 0.248(Caspase 9 inhibitor) + 0.274(K(ir) 6.2 channel activator) -1.28(tRNA methyltransferase inhibitor) -0.825(Catechol 2.3-dioxygenase inhibitor) + 0.329(Uterine relaxant) -0.175(RARA expression enhancer) + 0.38(Carcinogenic. mouse. male. lung) -0.363(Renin inhibitor) + 0.312(Carcinogenic. rat. female. lung) + 0.96(Adenosine A3 receptor antagonist) -0.136(Antihypertensive) + 1.69(CYP4F3 substrate) -0.22(11-Beta-hydroxysteroid dehydrogenase inhibitor) -0.606(Histamine H2 receptor agonist) + 0.59(SUMO-conjugating enzyme UBC9 inhibitor) -0.295(SLC7A5 expression enhancer) + 0.278(Dermatologic) + 0.412(Estrogen alpha receptor agonist) -0.339(Antimycobacterial) -0.261(Antiviral (Hepatitis C)) + 0.634(DNA ligase (ATP) inhibitor) -0.38(Antiperistaltic) -0.556(Cholesterol antagonist) -0.176(Spasmolytic. urinary) -0.249(Polo-like kinase-3 inhibitor) + 0.18(Purinergic P2X1 antagonist) + 0.447(Antiprotozoal (Leishmania)) -0.411(CTNNB1 expression inhibitor) -0.257(Lysophosphatidic acid 3 receptor antagonist) -0.183(Cyclin T1 inhibitor) -0.954(5-Formyltetrahydrofolate cyclo-ligase inhibitor) + 0.315(Signal transduction pathways inhibitor) + 0.224(Hypersexuality) + 0.44(Histamine H2 receptor antagonist) -0.812(Sigma 2 receptor antagonist) + 0.159(Ecdysone 20-monooxygenase inhibitor) + 0.72(Tyrosine phenol-lyase inhibitor) -0.512(Carcinogenic. mouse) -0.352(Matrix metalloproteinase 3 (membrane-type) inhibitor) + 0.431(Carcinogenic. rat. female. vascular system) + 0.648(Sensory disturbance) -0.207(Potassium channel intermediate-conductance Ca-activated blocker) + 0.564(15-Lipoxygenase inhibitor) + 0.219(GDPD3 expression enhancer) -1.91(Orotate phosphoribosyltransferase inhibitor) -0.626(Thioredoxin reductase inhibitor) + 0.143(Alpha 1a adrenoreceptor agonist) -0.247(24-sterol C-methyltransferase inhibitor) -0.876(Beta 2 adrenoreceptor agonist) -0.206(GP IIb/IIIa receptor antagonist) + 0.225(Guanine deaminase inhibitor) + 0.184(Lipase inhibitor) -0.545(Anesthetic inhalation) -0.245(Lactoylglutathione lyase inhibitor) + 0.555(Narcolepsy treatment) -0.417(Transforming growth factor antagonist) + 0.209(Sexual dysfunction) -0.221(CDK1/cyclin B inhibitor) + 0.327(Phosphatidylcholine-sterol O-acyltransferase inhibitor) + 0.838(Alanine dehydrogenase inhibitor) + 0.697(HCV NS3/NS4A protease inhibitor) + 1.27(Neuraminidase (Influenza A) inhibitor) + 0.711(SPP1 expression enhancer) -0.629(Histidine decarboxylase inhibitor) -0.245(Melatonin antagonist) -0.81(Glycogen debranching enzyme inhibitor) + 0.479(Histamine release stimulant) -0.23(Antitussive) -0.635(Peptidyl-prolyl cis-trans isomerase inhibitor) -0.741(UGT1A3 substrate) + 0.498(Liver X receptor beta agonist) -0.2(NADPH oxidase 1 inhibitor) + 0.401(Anesthetic local) -0.128(Peroxisome proliferator-activated receptor gamma agonist) -0.498(Arylamine N-Acetyltransferase substrate) -0.517(Aminopeptidase B inhibitor) -0.257(Aurora-B kinase inhibitor) -0.495(CCNA2 expression enhancer) + 0.198(Lichenoid eruption) -0.261(Antiseptic) -0.203(Transcription factor AP-1 inhibitor) -0.492(Atrolysin C inhibitor) + 0.304(Antifungal) -0.25(CYP2C substrate) -0.189(HMG CoA reductase inhibitor) + 0.193(Interleukin 1 antagonist) -0.38(Cystic fibrosis treatment) + 0.432(Allergic reaction) + 0.216(Protein kinase C mu inhibitor) + 0.862(Heat shock 70 kDa protein 1 antagonist) + 0.307(Clk dual-specificity kinase inhibitor) + 0.701(Phosphoglucomutase inhibitor) + 0.315(Probable DNA dC->dU-editing enzyme APOBEC-3A inhibitor) -0.21(Inflammation) -0.847(Protein phosphatase 2B inhibitor) + 0.31(Pemphigus) -0.547(Lysine carboxypeptidase inhibitor) -0.129(Ribosomal protein S6 kinase alpha 2 inhibitor) -0.122(Yawning) + 0.314(TIMP1 expression enhancer) + 0.218(Necrosis) -0.179(Polo-like kinase inhibitor) + 0.177(Psychoses) -0.329(Genotoxic) + 1.27(N-acylneuraminate cytidylyltransferase inhibitor) -0.232(Ribosomal protein S6 kinase. 90-kDa inhibitor) -0.315(AKR1C2 expression enhancer) -0.784(Glutamate (mGluR6) antagonist) -0.111(Antineoplastic (carcinoma)) -0.341(Alcohol dehydrogenase inhibitor) + 0.135(Phosphate transporter inhibitor) + 0.328(Pectin lyase inhibitor) -0.612(mRNA (nucleoside-2'-O-)-methyltransferase inhibitor) + 0.214(Tremor) + 0.433(Stromelysin 2 inhibitor) -0.411(Palmitoyl-CoA hydrolase inhibitor) -0.215(Hyperkinesia) + 0.387(2-Dehydropantolactone reductase (A-specific) inhibitor) + 0.218(Eye irritation. weak) -0.465(Glycogen phosphorylase. muscle form inhibitor) -0.478(Thyroid hormone beta 1 antagonist) -0.631(NOS3 expression inhibitor) + 0.186(Protease inhibitor) + 0.0845(Antineoplastic (non-Hodgkin's lymphoma)) -0.124(Angiotensin AT2 receptor antagonist) + 0.2(Irritation) -0.397(Tyrosine-protein kinase ABL2 inhibitor) -0.159(CDC25 phosphatase inhibitor) + 0.24(Protein kinase B inhibitor) + 0.437(Astacin inhibitor) + 0.324(MAP kinase kinase inhibitor) -0.332(Stem cell growth factor agonist) + 0.236(Glutathione-disulfide reductase inhibitor) -0.408(CC chemokine receptor agonist) + 0.341(Raynaud's phenomenon) -0.0906(Antineoplastic (renal cancer)) -0.376(Xanthine oxidase inhibitor) + 0.198(Weight gain) + 0.0927(Acetyl-CoA transferase inhibitor) + 0.211(Antiepileptic) + 0.134(Phosphodiesterase 6B inhibitor) -0.136(Methionyl aminopeptidase 2 inhibitor) + 0.439(Fatty acid binding protein adipocyte inhibitor) + 0.148(Butyrate-CoA ligase inhibitor) -0.167(Antidiuretic hormone agonist) -0.329(Acid phosphatase inhibitor) + 4.53(Length^3) -0.135(Glutathionylspermidine synthase inhibitor) -0.358(Gastritis treatment) + 0.365(Histamine H1 receptor antagonist) + 0.0996(Antifungal enhancer) + 0.476(Carbonic anhydrase V inhibitor) + 0.321(Antiviral (CMV)) -0.0911(Tyrosine kinase non-receptor protein 2 inhibitor) -0.203(CA2 expression enhancer) -0.265(Cathepsin S inhibitor) + 0.236(Anticarcinogenic) -0.0862(Analgesic. non-opioid) + 0.262(Arylamine N-acetyltransferase inhibitor) + 0.178(N-carbamoyl-L-amino-acid hydrolase inhibitor) + 0.359(Melanin inhibitor) -0.256(SQLE expression inhibitor) + 0.16(Miotic) + 0.084(Estrogen-related receptor beta antagonist) + 0.118(Baculoviral IAP repeat-containing protein 2 inhibitor) + 0.134(Histone deacetylase class IIb inhibitor) + 0.455(2-(acetamidomethylene)succinate hydrolase inhibitor) + 0.12(BIRC3 expression enhancer) -0.117(L lactate dehydrogenase C inhibitor) -0.475(Dihydrodipicolinate synthase inhibitor) -0.102(T-cell protein-tyrosine phosphatase inhibitor) + 0.0814(Protein synthesis inhibitor) + 0.0709(Maillard reaction inhibitor) -0.0995(I kappa B kinase 2 inhibitor) -0.523(Lysophosphatidic acid receptor antagonist) + 0.448(Caspase 8 inhibitor) -0.462(Thyroid hormone beta antagonist) -0.251(Histone deacetylase 7 inhibitor) -0.322(Carbonic anhydrase stimulant) + 0.321(Sterol 3-beta-glucosyltransferase inhibitor) + 0.277(DNA methyltransferase I inhibitor) + 0.474(Glycine N-choloyltransferase inhibitor) -0.267(UDP-N-acetylglucosamine 1-carboxyvinyltransferase inhibitor) -0.324(Alpha 1 adrenoreceptor agonist) + 0.201(Geranylgeranyltransferase inhibitor) -0.307(Antimetabolite) -0.0727(Adenosine A2b receptor agonist) + 0.378(Thyroid hormone beta agonist) + 0.106(Alpha-L-fucosidase 1 inhibitor) -0.34(Calpain small subunit 1 inhibitor) -0.392(Testosterone 17beta-dehydrogenase inhibitor) + 0.274(Metalloproteinase inhibitor) -0.254(CXC chemokine 5 receptor antagonist) -0.227(Phosphoserine phosphatase inhibitor) + 0.192(CCL5 expression enhancer) -0.215(5 Hydroxytryptamine 4 antagonist) -0.333(Vibriolysin inhibitor) + 0.114(Carcinogenic. rat. female. urinary bladder) -0.0604(Antiemphysemic) + 0.193(Purinergic P2X2 antagonist) -0.0639(Selectin antagonist) + 0.221(UDP-glucose 4-epimerase inhibitor) + 0.137(JUN expression enhancer) + 0.12(Antinociceptive) -0.11(CD86 expression enhancer) -0.0911(Glycosylceramidase inhibitor) + 0.0628(Interleukin antagonist) + 0.201(K(ir) 6.1 channel blocker) + 0.142(ABCG2 expression enhancer) + 0.115(Beta-mannosidase inhibitor) + 0.0843(Radioprotector) -0.112(Withdrawal) + 0.0599(Diaminopimelate decarboxylase inhibitor) -0.0603(Phospholipase A1 inhibitor) -0.309(AMP nucleosidase inhibitor) + 0.0951(Urinary incontinence treatment) + 0.0825(Catechol oxidase inhibitor) -0.199(Protocatechuate 4.5-dioxygenase inhibitor) -0.052(Potassium channel (Inward rectifier) 11 blocker) + 0.202(Fatty acid binding protein inhibitor) -0.182(Histone deacetylase class IIa inhibitor) -0.0419(Serine/threonine-protein kinase MRCK-A inhibitor) + 0.0544(Janus tyrosine kinase 1 inhibitor) + 0.132(Imidazoline I2 receptor antagonist) + 0.0412(Vesicle monoamine transporter 2 inhibitor) -0.0523(Integrin beta5 antagonist) + 0.0618(Antibacterial) -0.0766(Anti-Helicobacter pylori) -0.0388(Aggrecanase 1 inhibitor) + 0.0444(cAMP-dependent protein kinase beta catalytic subunit inhibitor) + 0.0357(Factor V inhibitor) -0.0762(Purinergic P2 antagonist) -0.129(Endothelin-converting enzyme 1 inhibitor) -0.0499(Beta-adrenergic receptor kinase inhibitor) -0.0331(ATPase (Mitochondrial F1F0) inhibitor) -0.217(Glucose-1-phosphate adenylyltransferase inhibitor) + 0.145(Argininosuccinate synthase inhibitor) + 0.0464(Vasoprotector) -0.0511(Anesthetic) + 0.11(Collagenase inhibitor) -0.0571(Gonadotropin antagonist) + 0.0661(Phospholipase C inhibitor) + 0.0241(Equilibrative nucleoside transport protein inhibitor) + 0.0412(Sigma receptor agonist) -0.0298(Adenosine uptake inhibitor) + 0.0371(Protein kinase B beta inhibitor) -0.0331(Leucyltransferase inhibitor) -0.0256(Presenilin 1 inhibitor) -0.0582(SUMO-activating enzyme subunit 1 inhibitor) + 0.0227(Cathepsin B inhibitor) + 0.0469(Sickle-cell anemia treatment) -0.0547(Lactate 2-monooxygenase inhibitor) + 0.0228(Convulsant) + 0.0265(Prostaglandin E1 agonist) -0.0233(Poly(ADP-ribose) polymerase 1 inhibitor) -0.0178(Potassium channel (Ca-activated) blocker) + 0.0227(Apnea) -0.0316(Cytotoxic) + 0.0193(K(Ca) 3.1 channel blocker) -0.0145(CC chemokine 5 receptor agonist) + 0.0119(Phosphoglycerate kinase 2 inhibitor) + 0.0116(Carnitine palmitoyltransferase inhibitor) -0.0326(Protein Wnt-2 inhibitor) -0.00922(Calcium-dependent phospholipase A2 inhibitor) + 0.011(Protein-tyrosine sulfotransferase inhibitor) -0.0107(LAMP3 expression inhibitor) -0.00344(HIV attachment inhibitor) + 0.0049(Phosphodiesterase 6H inhibitor) -0.00496(Antinaupathic) + 0.00795(Phosphatidate cytidylyltransferase inhibitor) + 0.00509(Alkaline phosphatase inhibitor) + 5.06

Model 47

+ 0.166(Thiopurine S-methyltransferase inhibitor) + 0.493(TFF1 expression inhibitor) + 13.4(Length) + 0.425(Dextransucrase inhibitor) -0.386(HCV NS5B polymerase inhibitor) + 0.051(Antineoplastic (multiple myeloma)) + 0.594(Dyskinesia) + 0.546(CYP11B2 inhibitor) + 0.824(Phosphatidylcholine-sterol O-acyltransferase inhibitor) -0.38(Serine/threonine-protein kinase WEE1 inhibitor) -13.8(Length^2) + 0.886(GABA B receptor antagonist) + 0.0299(Thrombophlebitis) -1.16(Cholesterol antagonist) + 0.502(Gastrointestinal disturbance) -0.227(Sodium/hydrogen exchanger 1 inhibitor) + 0.468(Bronchoconstrictor) -0.437(Epstein-Barr nuclear antigen 1 inhibitor) -0.107(Alcohol dehydrogenase (NADP+) inhibitor) -0.853(Dermatitis) + 0.404(Toxic. respiration) -0.0101(Alpha 1a adrenoreceptor agonist) -0.352(Purine biosynthesis inhibitor) + 0.194(Radiosensitizer) + 0.456(T cell inhibitor) -0.63(Bradykinin antagonist) + 0.0568(Anesthetic) -0.481(VEGFA expression enhancer) + 0.225(GSTP1 expression enhancer) -0.488(Matrix metalloproteinase (membrane-type) inhibitor) + 0.463(Insecticide) -0.247(Platelet aggregation inhibitor) -0.591(Glutathione S-transferase substrate) + 0.965(Colony stimulating factor agonist) -0.751(Alpha-N-acetylgalactosaminide alpha-2.6-sialyltransferase inhibitor) -24.2(Volume^2) + 0.0639(MT2A expression enhancer) + 0.0642(Antipsoriatic) + 0.281(Matrix metalloproteinase 4 (membrane-type) inhibitor) + 0.553(Protein-tyrosine sulfotransferase inhibitor) + 0.294(Cytochrome P450 stimulant) + 0.881(Phenylalanine 4-hydroxylase inhibitor) + 1.15(Ether-a-go-go potassium channel blocker) -0.346(Cyclin B inhibitor) -1.33(MAO B inhibitor) + 0.128(Lipase inhibitor) + 0.486(Sentrin-specific protease 6 inhibitor) + 0.188(Spasmolytic) -1.31(Adenylylsulphatase inhibitor) -1.66(Sigma 2 receptor antagonist) -0.634(Glutamate synthase (ferredoxin) inhibitor) -0.318(NGFR expression enhancer) + 25.3(Volume) -1.38(Glycogen debranching enzyme inhibitor) -0.704(Carcinogenic. mouse) -0.503(CYP3A inducer) + 0.449(TIE-2 antagonist) -0.197(L lactate dehydrogenase C inhibitor) -0.657(Antitoxic) -0.185(CYP11A1 inhibitor) -1.18(Glyoxylate reductase (NADP+) inhibitor) -0.304(Lipid peroxidase inhibitor) + 6.51(Volume^3) + 0.489(Chorismate mutase inhibitor) + 0.711(Estrogen alpha receptor agonist) + 0.359(Methylenetetrahydrofolate reductase (NADPH) inhibitor) + 0.503(Vanilloid 4 antagonist) + 0.296(Biliary tract disorders treatment) -0.556(Putrescine oxidase inhibitor) + 0.195(Nucleotidyltransferase inhibitor) -0.254(Glutamate (mGluR5) agonist) + 0.461(BCL2 expression inhibitor) -1.37(Ethanolamine kinase inhibitor) + 1.18(Retinyl-palmitate esterase inhibitor) + 0.302(Cytosolic phospholipase A2 beta inhibitor) -0.311(Prostaglandin F2 alpha antagonist) -0.331(Myocardial ischemia treatment) + 0.295(Cruzipain inhibitor) + 0.138(Dopamine D4 antagonist) -0.433(CTGF expression inhibitor) + 0.276(Sphingomyelinase inhibitor) + 0.515(Cytochrome-b5 reductase inhibitor) -0.293(EIF5A expression inhibitor) + 1.03(Carcinogenic. group 1) + 0.364(Protein kinase B inhibitor) -0.933(Fatty liver) + 0.541(S-adenosyl-L-methionine decarboxylase inhibitor) + 0.105(MAP kinase 3 inhibitor) + 0.775(Choline sulfotransferase inhibitor) -0.685(Acid phosphatase inhibitor) -0.249(Prostate disorders treatment) + 0.355(Integrin antagonist) -1.16(Chemokine receptor agonist) + 0.409(Cardiodepressant) -0.236(Amiloride-sensitive cation channel 1 blocker) + 1.06(Arylamine N-acetyltransferase inhibitor) + 0.589(Adenylyl-sulfate kinase inhibitor) + 0.649(Skin irritation. weak) -0.205(Presenilin 1 inhibitor) -0.33(Histamine H3 receptor antagonist) + 0.487(HCV NS3/NS4A protease inhibitor) -0.422(CYP2C substrate) -0.286(CTNNB1 expression inhibitor) -0.481(Carcinogenic. mouse. male. kidney) + 0.332(Neurotoxic) -0.45(Vascular endothelial growth factor 3 antagonist) + 0.38(Sigma receptor agonist) -1.36(5-Formyltetrahydrofolate cyclo-ligase inhibitor) + 0.408(Platelet adhesion inhibitor) -0.283(Polynucleotide adenylyltransferase inhibitor) + 0.3(Pim-2 kinase inhibitor) + 0.391(Estrogen beta receptor agonist) -1.05(3-Dehydroquinate synthase inhibitor) + 1.11(Oxaloacetate decarboxylase inhibitor) + 0.28(Hallucinogen) -0.167(RNA directed DNA polymerase inhibitor) + 0.177(Interleukin 1 antagonist) -0.618(Sensitization) + 0.509(Liver X receptor agonist) + 1.01(Carbonic anhydrase VA inhibitor) -0.329(Tardive dyskinesia treatment) -0.202(Angiotensin AT1 receptor antagonist) -0.438(Integrin beta3 antagonist) -0.303(Estrogen receptor beta antagonist) -1.12(Carbonic anhydrase VI inhibitor) -0.318(CDK2/cyclin E inhibitor) -0.448(Phosphomannomutase inhibitor) + 0.189(HCV NS5A inhibitor) + 0.705(1-Pyrroline-5-carboxylate dehydrogenase inhibitor) -0.202(Microtubule stabilization) -0.11(Dihydroorotase inhibitor) + 0.0715(Dual specificity phosphatase 1 inhibitor) + 0.118(Adenosylmethionine cyclotransferase inhibitor) -1.12(Nicotinic receptor alpha9 subunit antagonist) -0.866(Aspartate transaminase inhibitor) + 0.478(Steroid synthesis inhibitor) + 0.296(Endometrios treatment) + 0.194(Aconitate hydratase inhibitor) -0.57(DNA-(apurinic or apyrimidinic site) lyase inhibitor) -0.379(Lactose synthase inhibitor) -0.252(Glutamate (mGluR4) antagonist) -0.242(NADPH oxidase 4 inhibitor) + 1.52(Sialidase 1 inhibitor) + 0.519(Ulcer. peptic) -0.205(Antineoplastic (lymphocytic leukemia)) -0.622(Analgesic stimulant) -0.759(UGT1A3 substrate) + 0.253(Trypsin III inhibitor) + 0.465(TNF expression enhancer) -0.418(Stem cell growth factor agonist) + 0.653(L-iditol 2-dehydrogenase inhibitor) + 0.2(Diuretic) -0.463(Gastrointestinal hemorrhage) + 1.15(UGT2B7 substrate) + 0.112(Antineoplastic (brain cancer)) + 0.194(Periodontitis treatment) -0.565(IGF1 expression enhancer) -0.501(Peptidyl-Lys metalloendopeptidase inhibitor) + 0.289(Glutamate (mGluR3) antagonist) -0.226(CYP2B1 substrate) + 0.663(Fatty acid binding protein inhibitor) + 0.129(Antileukemic) + 0.296(MMP2 expression inhibitor) + 0.487(CYR61 expression enhancer) + 0.529(Pneumotoxic) + 0.393(Urotensin II agonist) + 0.366(CDKN2C expression inhibitor) -0.236(Kainate receptor 1 antagonist) -0.586(Dihydroorotate dehydrogenase inhibitor) -0.185(Polo-like kinase-2 inhibitor) + 0.139(Adenylate cyclase VIII inhibitor) + 0.262(Hematotoxic) -0.286(Dyspnea) + 0.192(Benzodiazepine antagonist) + 0.383(Anesthetic local) -0.311(Hot flush treatment) + 0.246(Weight gain) + 0.262(Thromboxane antagonist) -0.0519(CYP3A4 inhibitor) + 0.537(CD14 expression enhancer) -0.212(Gelatinase inhibitor) + 0.241(Caspase 9 inhibitor) -0.258(Tubulin agonist) + 0.139(Urologic disorders treatment) -0.337(Catechol 2.3-dioxygenase inhibitor) -0.167(Keratoses actinic (solar) treatment) -0.285(Acylaminoacyl-peptidase inhibitor) + 0.511(Potassium channel Kv1.1 blocker) -0.555(CYP2B4 substrate) + 0.269(Ribosomal protein S6 kinase 1. 70-kDa inhibitor) -0.313(Splenomegaly) + 0.166(Elastase 2 inhibitor) + 0.143(Lysine-tRNA ligase inhibitor) + 0.154(Farnesyltransferase inhibitor) -0.498(Acetoin dehydrogenase inhibitor) + 0.101(Isoleucine-tRNA ligase inhibitor) + 0.275(CYP3A2 substrate) -0.459(CYP26 inhibitor) + 0.182(Phosphate transporter inhibitor) + 0.155(K(ir) 6.2 channel activator) + 0.338(Adenosine A2a receptor antagonist) + 0.265(Cytochrome oxidase inhibitor) + 0.632(Proto-oncogene protein c-fos inhibitor) + 0.326(Pectate lyase inhibitor) + 0.921(Peptide deformylase inhibitor) + 0.231(Nicotinic acid receptor agonist) -0.183(Phosphorylase kinase gamma subunit 1 inhibitor) -0.578(5 Hydroxytryptamine 4 antagonist) + 0.416(CYP1A1 inhibitor) -0.727(Protein phosphatase 2B inhibitor) + 0.105(Troponin I. cardiac muscle inhibitor) -0.234(Lysophosphatidic acid 3 receptor antagonist) + 0.545(NMDA receptor subunit 3A antagonist) -0.18(Estradiol 17 beta dehydrogenase 2 inhibitor) -0.288(Phosphatidylinositol diacylglycerol-lyase inhibitor) -0.293(Antitussive) + 0.299(Carcinogenic. rat. female. urinary bladder) + 0.274(Ubiquitin-conjugating enzyme E2 N inhibitor) -0.271(Alopecia (hair loss)) + 0.601(Hematopoietic) -0.229(Smo receptor antagonist) -0.2(Potassium channel (Inward rectifier) 11 blocker) + 0.705(Glyceraldehyde-3-phosphate dehydrogenase (phosphorylating) inhibitor) -0.437(DNA directed DNA polymerase inhibitor) -0.345(Glycosuria) + 8.25(Length^3) -0.67(IFITM1 expression enhancer) + 0.365(NUPR1 expression enhancer) -0.668(UGT1A1 substrate) + 0.441(Phospholipase inhibitor) -0.64(Aldose reductase 2 inhibitor) -0.209(Phosphodiesterase III inhibitor) -0.327(Mandelate 4-monooxygenase inhibitor) -0.196(Endothelin B receptor antagonist) + 0.39(Penicillin amidase inhibitor) -0.187(Glutamate (mGluR group I) agonist) + 0.146(Dependence) -0.152(5 Hydroxytryptamine 1F agonist) -0.146(Peptidyl-prolyl cis-trans isomerase FKBP1B inhibitor) + 0.196(Keratitis) + 0.422(Magnesium-protoporphyrin IX methyltransferase inhibitor) + 0.332(Chitinase inhibitor) -0.461(Thrombin inhibitor) -0.174(MAP kinase 8 inhibitor) + 0.151(Purinergic P2Y1 antagonist) -0.397(Quinone reductase 2 inhibitor) -0.183(2.3-Oxidosqualene-lanosterol cyclase inhibitor) + 0.468(Acetylcholine M3 receptor antagonist) -0.512(Testosterone 17beta-dehydrogenase inhibitor) + 0.535(CXC chemokine 1 receptor antagonist) -0.843(Hydroxyacylglutathione hydrolase inhibitor) + 0.41(Glutamate decarboxylase inhibitor) -0.34(Inner centromere protein inhibitor) + 0.357(Lysyl oxidase inhibitor) + 0.292(Antinephritic) -0.409(Melatonin agonist) + 0.162(Butyrate-CoA ligase inhibitor) + 0.132(Bulimia treatment) -0.563(NRIP1 expression enhancer) + 0.213(Mineralocorticoid) -0.117(5 Hydroxytryptamine 4E antagonist) -0.224(Immunostimulant) -0.164(Hirsutism treatment) -0.876(mRNA (guanine-N7-)-methyltransferase inhibitor) -0.356(Aminopeptidase B inhibitor) -0.15(Hypertensive) + 0.155(Clk dual-specificity kinase inhibitor) + 0.894(CYP27A substrate) -0.138(Lipocortins synthesis antagonist) + 0.0754(CYP2B6 expression enhancer) -0.26(Antiuremic) + 0.582(Thymidine kinase (Herpes simplex virus 2) inhibitor) + 0.153(Matrix metalloproteinase 1 inhibitor) + 0.599(Guanylate kinase inhibitor) + 0.136(Antidepressant) + 0.156(Hematuria) -0.1(Hexokinase stimulant) + 0.0887(PDCD4 expression enhancer) + 0.524(Heat shock 70 kDa protein 1 antagonist) + 0.139(Elastase 2B inhibitor) + 0.627(P3 purinoceptor-like protein antagonist) -0.632(6-Phosphofructo-2-kinase inhibitor) + 0.2(Ovulation inhibitor) -0.243(Histidinol dehydrogenase inhibitor) -0.134(Transcription factor E2F1 inhibitor) + 0.256(TFF1 expression enhancer) + 0.599(Neuraminidase (Influenza A) inhibitor) -0.272(UGT2B1 substrate) -0.285(AREG expression enhancer) -0.151(Carcinogenic. group 3) + 0.375(Adenosine A1 receptor agonist enhancer) -0.133(Estradiol 17 beta-dehydrogenase 1 inhibitor) -0.355(GABA transporter inhibitor) + 0.412(Anticholelithogenic) -0.199(Myasthenia Gravis) + 0.105(CC chemokine 1 receptor antagonist) -0.356(Glutamate (mGluR6) antagonist) -0.109(Antipsychotic) + 0.435(Tyrosine transaminase inhibitor) -0.132(Electron transport complex I inhibitor) + 0.32(Cell wall synthesis inhibitor) -0.06(Liver fibrosis treatment) + 0.073(Angiogenesis stimulant) -0.105(Tyrosine kinase non-receptor protein 2 inhibitor) -0.28(Nicotinic receptor gamma subunit antagonist) -0.284(Histone deacetylase 9 inhibitor) -0.13(JUN expression inhibitor) -0.18(Sulfotransferase substrate) -0.403(Glutathione S-transferase P1 inhibitor) + 0.0998(Sirtuin 2 inhibitor) -0.0893(HMG CoA reductase inhibitor) + 0.0964(Urticaria) -0.12(Antisecretoric) -0.284(YAK3 inhibitor) -0.0599(HIV attachment inhibitor) -0.0863(Analgesic. opioid) -0.125(Choreoathetosis) -0.274(Glucosyl transferase inhibitor) + 0.227(Cathepsin D inhibitor) -0.405(Methylcrotonoyl-CoA carboxylase inhibitor) -0.393(KRT18 expression enhancer) + 0.208(IFIT1 expression enhancer) + 0.097(Paralysis) + 0.177(TXNRD1 expression enhancer) -0.0642(Hypotension) + 0.188(TH expression enhancer) -0.18(Protein-Npi-phosphohistidine-sugar phosphotransferase inhibitor) + 0.177(NMDA receptor agonist) -0.0611(MAP3K7 inhibitor) + 0.0705(Opioid kappa 1 receptor antagonist) + 0.0546(Integrin alphaVbeta1 antagonist) -0.0976(Amiloride-sensitive sodium channel 1 alpha-subunit blocker) + 0.0606(N-acetylmuramoyl-L-alanine amidase inhibitor) + 0.0908(Antianorexic) + 0.167(5 Hydroxytryptamine 1D antagonist) -0.118(Janus tyrosine kinase 2 inhibitor) + 0.12(TP53I3 expression enhancer) -0.187(Thyroid hormone agonist) + 0.0523(Diabetic retinopathy treatment) -0.121(Free radical scavenger) -0.0761(Eye irritation. inactive) + 0.0408(3 Beta-hydroxy-delta 5-steroid dehydrogenase inhibitor) + 0.14(UGT2B4 substrate) + 0.163(NMDA receptor glycine site agonist) + 0.0908(Keratopathy) + 0.125(Leukotriene antagonist) -0.0574(Allergic dermatitis) + 0.127(Phosphatidate cytidylyltransferase inhibitor) + 0.0393(Ca2+/calmodulin-dependent kinase I alpha inhibitor) + 0.11(Alanine dehydrogenase inhibitor) + 0.0497(Nephritis) -0.0997(Potassium channel (ATP-sensitive) blocker) + 0.0185(Antineoplastic) -0.1(EGR3 expression enhancer) + 0.0442(DNA polymerase beta inhibitor) -0.0415(Sodium channel blocker) + 0.0293(Sodium/glucose cotransporter 2 inhibitor) + 0.0366(5 Hydroxytryptamine 1 antagonist) + 0.0654(Sodium/calcium exchanger inhibitor) -0.0749(Potassium channel Kv1.3 blocker) + 0.179(NAD+ diphosphatase inhibitor) + 0.174(TRPV2 blocker) + 0.0237(Fatty acid binding protein muscle inhibitor) -0.0452(Antimutagenic) + 0.0284(Fibroblast growth factor 3 antagonist) -0.0229(CDC25A inhibitor) -0.079(Transthyretin amyloid fibril formation inhibitor) -0.0729(Protein Wnt-2 inhibitor) + 0.0565(Procollagen-lysine 5-dioxygenase inhibitor) + 0.0548(Envelysin inhibitor) + 0.0549(Urotensin II antagonist) + 0.0303(Nuclear receptor subfamily 2. group E. member 3 agonist) -0.0148(CC chemokine 2 receptor antagonist) + 0.0358(Corticotropin releasing factor 1 receptor antagonist) -0.0159(Membrane integrity agonist) -0.0133(Keratolytic) + 0.0333(SERPINE1 expression enhancer) -0.0176(HSPA5 expression enhancer) + 0.0426(Phosphate acetyltransferase inhibitor) -0.0111(Interferon inducer) -0.0288(CGB expression enhancer) + 0.0142(Benzodiazepine receptor peripheral-type antagonist) -0.0453(Ribonucleoside-diphosphate reductase M1 chain inhibitor) -0.00649(Antineoplastic (carcinoma)) + 0.00963(Interleukin 1 beta converting enzyme inhibitor) + 0.0198(Histone deacetylase inhibitor) -0.0274(Antimetabolite) -0.0162(DNA gyrase inhibitor) + 0.00332(Autotaxin inhibitor) -0.00926(Dipeptidyl peptidase I inhibitor) -0.00472(Glucose-6-phosphate translocase inhibitor) + 5.94

Model 48

-0.0115((R)-3-amino-2-methylpropionate-pyruvate transaminase inhibitor) + 0.335(Apnea) + 0.0918(Amyloid beta precursor protein antagonist) + 11.1(Length) -0.486(Neutropenia) + 0.0125(Delusion) + 0.352(Ocular toxicity) -0.368(Glutamate dehydrogenase [NAD(P)+] inhibitor) -19.4(Length^2) -0.143(SUMO-activating enzyme subunit 2 inhibitor) + 0.381(Antifungal) + 0.134(Microsomal triglyceride transfer protein inhibitor) -0.574(Endothelin receptor antagonist) + 0.741(CDC-like kinase 2 inhibitor) + 0.495(Bradycardic) + 0.161(Thioredoxin glutathione reductase inhibitor) -0.824(Antihematotoxic) + 0.232(Magnesium-protoporphyrin IX methyltransferase inhibitor) -0.429(Cystathionine gamma-lyase inhibitor) -0.0356(Arylformamidase inhibitor) + 0.393(Myocarditis) -0.451(Phosphodiesterase VIII inhibitor) + 0.343(Transglutaminase 2 inhibitor) -0.835(MAO inhibitor) -0.717(Hyperthermic) -0.277(Prostate disorders treatment) -0.961(Phosphoserine phosphatase inhibitor) + 0.336(Antibiotic Cephalosporin-like) + 0.231(Hypersexuality) + 0.155(Proto-oncogene tyrosine-protein kinase Kit inhibitor) -0.373(AICAR transformylase inhibitor) + 0.269(Antiparkinsonian. tremor relieving) + 1.08(Sulfinoalanine decarboxylase inhibitor) -0.0813(Anticoagulant) + 27.7(Volume) + 0.316(Protein kinase B inhibitor) + 1(Colony stimulating factor agonist) -0.327(Analgesic) -0.237(RNA-directed RNA polymerase (Influenza A) inhibitor) + 0.437(HMGCS1 expression enhancer) + 0.158(FGFR3 expression inhibitor) + 0.471(CXCL12 expression enhancer) -0.232(Thrombocytopoiesis inhibitor) -0.505(Lipid peroxidase inhibitor) -23.8(Volume^2) -1.49(Histone-lysine N-methyltransferase. H3 lysine-9 specific 3 inhibitor) + 0.302(Endometrios treatment) -1.13(UDP-glucuronosyltransferase 2B7 inhibitor) -0.307(Check point kinase inhibitor) + 0.45(Glyceraldehyde-3-phosphate dehydrogenase inhibitor) -0.573(Dermatitis) + 0.691(Serine carboxypeptidase inhibitor) -0.409(11-Beta-hydroxysteroid dehydrogenase 1 inhibitor) + 1.25(Adenosine A1 receptor agonist enhancer) -0.108(PTGS2 expression enhancer) + 0.522(CNS active muscle relaxant) -0.334(Antimycobacterial) -0.406(Sulfotransferase substrate) + 0.244(Interleukin 5 antagonist) -0.438(Histamine H3 receptor antagonist) -0.722(Kallikrein 13 inhibitor) + 0.47(Inosine monophosphate dehydrogenase 1 inhibitor) -0.349(Teratogen) + 11.7(Length^3) + 0.46(Imidazoline I2 receptor antagonist) -1.19(DNA methylase inhibitor) -0.313(Purinergic P2T antagonist) -0.353(ICAM1 expression inhibitor) -0.352(Protein kinase (CK2) inhibitor) -1.25(Amylo-alpha-1.6-glucosidase inhibitor) -0.33(IL12B expression inhibitor) + 0.644(Stromelysin 2 inhibitor) + 0.593(Irritation) -0.392(YWHAE expression inhibitor) + 0.145(Carbonic anhydrase IV inhibitor) + 0.0555(Neurodegenerative diseases treatment) + 0.342(Xanthine-like) -0.812(Beta lactamase inhibitor) -0.309(Kainate receptor 4 antagonist) + 0.481(Behavioral disturbance) + 0.831(Phospholipase A2 inhibitor) -0.119(TRPA1 antagonist) + 0.27(Biliary tract disorders treatment) + 0.79(Adenylate cyclase III inhibitor) + 0.0403(Alcohol dehydrogenase inhibitor) + 0.766(Adenosine A3 receptor antagonist) + 0.784(Phosphatidylinositol 4-kinase inhibitor) + 0.615(Phenylalanine 4-hydroxylase inhibitor) -0.21(Sodium channel blocker) + 0.734(CYP2D6 inhibitor) -0.401(Antihypertriglyceridemic) -0.576(Antiuremic) + 0.00668(Phenylalanine-tRNA ligase inhibitor) -0.235(Cytostatic) + 0.0673(Caspase 2 inhibitor) -0.619(Potassium channel Kv4.3 blocker) + 0.182(Antibiotic Aminoglycoside-like) -0.966(Diphosphate-fructose-6-phosphate 1-phosphotransferase inhibitor) + 0.254(Uterine relaxant) -0.164(Antineoplastic (renal cancer)) + 0.272(Antineoplastic (colon cancer)) -0.443(Pyruvate dehydrogenase kinase inhibitor) -0.431(Growth hormone release inhibitor) -0.302(CYP3A7 substrate) -1.07(Beta 2 adrenoreceptor agonist) -0.139(Myocardial infarction treatment) -0.227(Keratolytic) -0.801(Diacylglycerol cholinephosphotransferase inhibitor) + 0.17(Sirtuin 2 inhibitor) + 0.0806(Analgesic. non-opioid) + 0.517(D-Octopine dehydrogenase inhibitor) + 0.594(Phosphatidate cytidylyltransferase inhibitor) -0.35(Leukotriene B4 receptor 2 antagonist) -0.225(Antineoplastic (lymphocytic leukemia)) -0.233(Vasopressin 1A antagonist) + 0.14(Plasmepsin inhibitor) + 0.372(15-Lipoxygenase 2 inhibitor) -0.315(Leucyltransferase inhibitor) -0.35(EDN1 expression inhibitor) -0.228(Nucleoside transporters inhibitor) -0.462(Heat shock protein 90 alpha antagonist) -0.205(Carcinogenic. mouse) + 0.232(Carcinogenic. rat. male. all tumor bearing animals) -0.554(Thromboxane synthase inhibitor) -0.278(Epstein-Barr nuclear antigen 1 inhibitor) + 0.483(Hypocalcaemic) + 0.133(Antibiotic Penicillin-like) + 1.09(Pyruvate dehydrogenase stimulant) + 0.142(Chronic obstructive pulmonary disease treatment) + 0.294(CDKN1A expression enhancer) + 1.29(CYP27A substrate) -0.164(Presenilin 1 inhibitor) + 0.355(Carcinogenic. rat. male. liver) -0.225(Choreoathetosis) -0.139(Apolipoprotein B-100 inhibitor) -0.3(Potassium channel activator) -0.281(Glycine transporter 1 inhibitor) -0.245(MAP kinase 13 inhibitor) -0.448(Gastrin inhibitor) + 0.217(NADPH oxidase inhibitor) -0.525(CCNE1 expression inhibitor) + 0.217(Phospho-N-acetylmuramoyl-pentapeptide-transferase inhibitor) + 0.453(Cyclin-dependent kinase inhibitor) + 0.257(CDC7 inhibitor) + 0.313(Nephritis) + 0.176(Factor V inhibitor) + 0.16(HIF1A expression inhibitor) + 0.656(Phosphodiesterase VII inhibitor) + 0.224(Cannabinoid CB2 receptor agonist) + 0.72(Antipruritic. non-allergic) -0.724(UGT2B20 substrate) + 0.147(Alpha 2c adrenoreceptor agonist) -0.507(Oxytocin agonist) + 0.627(Thromboxane antagonist) -0.279(Carbonyl reductase [NADPH] 1 inhibitor) + 0.352(Paranoia) + 0.238(Dopamine D3 antagonist) + 0.469(HMGCR expression inhibitor) -0.71(Peptidyl-Lys metalloendopeptidase inhibitor) -0.238(Steroid 17-alpha-hydroxylase/17.20 lyase inhibitor) -0.521(Adenosine kinase inhibitor) -0.478(Potassium channel (Ca-activated) activator) -0.46(Cyclin-dependent kinase 1 inhibitor) -0.613(Indanol dehydrogenase inhibitor) + 0.576(Glycosoaminoglycans antagonist) + 0.296(Carboxylesterase inhibitor) + 0.166(Chloride channel blocker) + 0.657(Membrane dipeptidase inhibitor) + 0.268(Glycogen synthase kinase-3 inhibitor) + 0.203(MAP kinase 3 inhibitor) -0.193(Melanin-concentrating hormone receptor 2 antagonist) + 0.197(G-protein-coupled receptor 120 agonist) -0.14(Antiviral (Rhinovirus)) -0.425(EDN1 expression enhancer) -0.239(Lipocortins synthesis antagonist) -0.361(Dopamine D3 agonist) + 0.204(Estrogen-related receptor beta antagonist) + 0.186(Antineurogenic pain) + 0.264(Allergic reaction) -0.729(UDP-N-acetylglucosamine 1-carboxyvinyltransferase inhibitor) -0.245(Cyclin-dependent kinase 5 inhibitor) -1.48(Chalcone isomerase inhibitor) + 0.577(SLC7A11 expression enhancer) + 1.02(Adenylate cyclase I stimulant) + 0.656(N-acetylglucosamine-6-phosphate deacetylase inhibitor) + 1.1(N-acylneuraminate cytidylyltransferase inhibitor) + 8.07(Volume^3) + 0.543(Antiviral (CMV)) -0.545(Heat shock protein 90 antagonist) -0.341(JUN expression inhibitor) + 0.148(HCV NS5A inhibitor) -0.56(Phosphodiesterase 1C inhibitor) + 0.34(GABA receptor agonist) -0.248(Neurotensin 2 receptor antagonist) -0.135(Protein-tyrosine kinase p55(blk) inhibitor) + 0.549(Granzyme B inhibitor) -0.0966(CYP2E1 substrate) -0.379(Chemokine receptor agonist) + 0.265(Antihelmintic) -0.284(Antiprotozoal (Trichomonas)) -0.108(Sodium/hydrogen exchanger inhibitor) + 0.436(CDK6 expression inhibitor) -0.458(UDP-3-O-acyl-N-acetylglucosamine deacetylase inhibitor) + 0.202(Coma) + 0.0914(Hepatic disorders treatment) -0.228(Carcinogenic. rat. male) + 0.637(CYP4A11 inhibitor) -1.04(GMP synthase inhibitor) -0.624(SMN2 expression enhancer) -0.188(Ribosomal protein S6 kinase. 90-kDa inhibitor) + 0.179(Hematinic) + 0.206(Carcinogenic. mouse. male. thyroid gland) -0.678(ATP citrate synthase inhibitor) -0.208(Beta-adrenergic receptor kinase inhibitor) + 0.246(Intestinal alkaline phosphatase inhibitor) -0.173(Adenosylhomocysteine nucleosidase inhibitor) + 0.141(Alpha galactosidase inhibitor) + 0.17(Thyroid hormone alpha antagonist) + 0.391(Leukotriene C antagonist) + 0.446(Morphine 6-dehydrogenase inhibitor) + 0.718(Adenosine A3 receptor agonist) -0.133(Antibiotic Oxacephem-like) -0.42(Methylenetetrahydrofolate dehydrogenase (NADP+) inhibitor) -0.177(RARA expression enhancer) -0.327(Cathepsin S inhibitor) -0.143(DNA intercalator) + 0.348(MAO B substrate) + 0.148(Sialidase 3 inhibitor) + 0.078(Autoimmune disorders treatment) + 0.166(THBS1 expression inhibitor) -0.142(T-cell protein-tyrosine phosphatase inhibitor) + 0.121(Liver X receptor alpha agonist) -0.217(Dizziness) -0.123(HIV-1 integrase (3'-Processing) inhibitor) + 0.404(Adenylate cyclase inhibitor) + 0.142(Death-associated protein kinase inhibitor) + 0.477(Phosphoglycerate dehydrogenase inhibitor) + 0.167(Alpha adrenoreceptor antagonist) + 0.211(Carcinogenic. rat. male. skin) -0.148(Platelet growth factor antagonist) + 0.39(Tyrosine phenol-lyase inhibitor) -0.133(5 Hydroxytryptamine 4E antagonist) -0.337(Nicotinic receptor beta1 subunit antagonist) + 0.095(Purinergic P2X4 antagonist) -0.372(Potassium channel KCNQ2 activator) -0.141(CYP3A substrate) + 0.153(Neurokinin antagonist) + 0.446(Carbonic anhydrase V inhibitor) + 0.131(Protocollagen prolyl hydroxylase inhibitor) -0.149(Protein kinase C beta II inhibitor) + 0.155(SV40 T antigen inhibitor) -0.113(DNA polymerase III inhibitor) + 0.131(11-Beta-hydroxysteroid dehydrogenase 2 inhibitor) -0.341(DNA excision repair protein ERCC-5 inhibitor) + 0.197(NADPH-ferrihemoprotein reductase inhibitor) + 0.452(MAP3K11 inhibitor) + 0.195(Mediator release inhibitor) + 0.171(Carcinogenic. rat. female. kidney) -0.268(CDK/Cyclin complex inhibitor) + 0.219(Membrane permeability enhancer) + 0.0925(Bombesin agonist) -0.0823(GST P1-1 substrate) + 0.303(ICAM 1 antagonist) -0.291(CXC chemokine 5 receptor antagonist) + 0.116(Phosphoinositide dependent kinase 1 inhibitor) -0.373(Dihydropyrimidinase inhibitor) -0.121(Agitation) -0.0902(Osteoclast antagonist) -0.26(UGT1A3 substrate) + 0.248(Prolactin inhibitor) -0.235(CDK2 expression inhibitor) -0.0859(CDC25A inhibitor) + 0.107(ADAM inhibitor) -0.31(Protein phosphatase 2B inhibitor) -0.127(Aurora kinase inhibitor) -0.283(Aldose reductase inhibitor) + 0.162(Exanthema) + 0.443(Leukotriene C4 antagonist) -0.113(Transcription factor E2F1 inhibitor) + 0.132(Photoallergy dermatitis) -0.318(Glutamate dehydrogenase inhibitor) + 0.107(Antiseborrheic) + 0.159(Transcription factor NF kappa B inhibitor) + 0.225(Phosphodiesterase 1A inhibitor) + 0.274(Ether-a-go-go potassium channel 1 blocker) + 0.274(Succinate dehydrogenase inhibitor) + 0.0826(Growth hormone releasing factor agonist) + 0.26(Somatostatin 2 antagonist) -0.0661(Potassium channel intermediate-conductance Ca-activated 4 blocker) + 0.177(TNFRSF1A expression inhibitor) -0.264(Lysophosphatidic acid 1 receptor antagonist) + 0.0664(Butyrate-CoA ligase inhibitor) -0.156(Cell wall biosynthesis inhibitor) -0.223(Prostaglandin EP3 antagonist) + 0.0896(Melanin-concentrating hormone receptor 1 antagonist) -0.0789(Neuropeptide Y5 antagonist) -0.217(Adenosine A2 receptor antagonist) -0.0774(CYP1A2 substrate) -0.0809(Selectin L antagonist) -0.0986(Splenomegaly) -0.0479(Acetylcholine M2 receptor agonist) -0.0664(Aryl-acylamidase inhibitor) + 0.0487(Protein kinase C nu inhibitor) + 0.0424(Cell division control protein 42 homolog inhibitor) + 0.039(Nitric oxide donor) -0.0513(Protein kinase C zeta inhibitor) + 0.0499(Carbonic anhydrase I stimulant) -0.0695(Benzodiazepine agonist partial) -0.0379(Phosphodiesterase inhibitor) + 0.0826(ATPase inhibitor) -0.0452(HIV-2 pol protein inhibitor) + 0.0397(Cathepsin L2 inhibitor) -0.0435(I kappa B kinase 2 inhibitor) + 0.0391(Attention deficit/hyperactivity disorder treatment) + 0.0794(Choline sulfotransferase inhibitor) -0.0288(Hirsutism treatment) + 0.0601(Interstitial nephritis) -0.0393(Acylaminoacyl-peptidase inhibitor) + 0.112(DNA methyltransferase I inhibitor) -0.0953(Carbonic anhydrase stimulant) + 0.0534(Piloerection) + 0.0304(Platelet activating factor beta antagonist) -0.0462(IFITM1 expression enhancer) -0.0971(Glycoprotein 3-alpha-L-fucosyltransferase inhibitor) -0.0163(Serine/threonine-protein kinase MRCK-A inhibitor) -0.0378(UDP-glucuronosyltransferase substrate) -0.0464(Nociceptin (N/OFQ) receptor antagonist) -0.0142(Bcl2 antagonist) + 0.0161(Integrin alpha4 antagonist) -0.0638(Lysophosphatidic acid receptor antagonist) + 0.0421(Matrilysin inhibitor) -0.0245(Photosensitizer) -0.0895(Dual specificity tyrosine-phosphorylation regulated kinase 1B inhibitor) -0.0391(Glutamate synthase (ferredoxin) inhibitor) + 0.041(Theanine hydrolase inhibitor) -0.00724(Dihydroorotase inhibitor) + 0.0122(Psychomotor impairment) -0.00925(CYP11A1 inhibitor) + 0.0131(Raf kinase B inhibitor) -0.0261(Procollagen C-endopeptidase inhibitor) -0.00657(Mineralocorticoid antagonist) + 0.0226(UGT2B10 substrate) + 0.0201(SUMO-conjugating enzyme UBC9 inhibitor) -0.00669(Sigma 1 receptor antagonist) -0.00273(Vascular (periferal) disease treatment) -0.00217(Cyclin-dependent kinase 2 inhibitor) + 0.00117(Aromatase inhibitor) + 0.000499(5 Hydroxytryptamine antagonist) + 0.000105(CCND1 expression inhibitor) + 5.78

Model 49

+ 1.13(Calcium antagonist) -0.412(Cystathionine gamma-lyase inhibitor) -0.623(Hexokinase inhibitor) -0.795(CYP3A4 inducer) + 1.09(NOS2 expression enhancer) -0.506(Antiulcerative) + 8.14(Length) -0.335(Flavin-containing monooxygenase substrate) -0.632(Lysozyme inhibitor) -0.0858(Osteoarthritis treatment) + 0.767(Ceramide glucosyltransferase inhibitor) -0.212(CYP2C10 substrate) -0.107(Glycine receptor agonist) -1.2(DNA synthesis inhibitor) -0.11(TNF convertase inhibitor) + 0.658(Pneumotoxic) -9.12(Length^2) + 0.271(Alpha-amylase inhibitor) + 0.433(Mood disorders treatment) + 1.94(Methionyl aminopeptidase 1 inhibitor) + 33.5(Volume) + 0.156(EphA2 antagonist) + 19.4(Volume^3) + 0.249(TIE-2 antagonist) + 0.412(Gastrointestinal disturbance) -38.3(Volume^2) -0.557(Akinesia) -1.07(Acid phosphatase inhibitor) + 0.437(HCV NS5A inhibitor) + 0.376(G-protein coupled bile acid receptor 1 antagonist) -0.277(Serine/threonine-protein kinase MRCK-A inhibitor) -0.348(Kainate receptor 3 antagonist) -0.439(Phosphodiesterase 8B inhibitor) + 0.021(Histone deacetylase SIRT1 inhibitor) + 0.55(Carcinogenic. rat. male. kidney) + 0.562(Gynecological disorders treatment) -0.369(Preterm labor treatment) + 1.41(Calmodulin-domain protein kinase 1 inhibitor) + 0.45(Serine carboxypeptidase inhibitor) + 0.542(Glucan 1.4-alpha-glucosidase inhibitor) + 0.284(GDPD3 expression enhancer) + 0.462(Coma) -0.99(Glycerate kinase inhibitor) -0.452(Nephrotoxic) -0.444(Photosensitizer) -0.116(Sodium/bile acid cotransporter inhibitor) -1.11(MAO inhibitor) -0.369(Purinergic P2 antagonist) + 0.665(Glutamate decarboxylase inhibitor) + 0.469(Bronchoconstrictor) + 0.336(Biliary tract disorders treatment) -0.474(Antitussive) + 0.497(CYP1A1* substrate) + 0.405(Alpha 2 adrenoreceptor antagonist) -1.96(N-formylglutamate deformylase inhibitor) + 0.214(Growth hormone release promoting) -0.167(Secretase gamma inhibitor) -0.316(Interferon inducer) -0.584(Carcinogenic. mouse. female) -0.564(TP73 expression enhancer) + 0.76(Chitinase inhibitor) -0.34(5 Hydroxytryptamine release inhibitor) -0.44(NGFR expression enhancer) + 1.24((R)-aminopropanol dehydrogenase inhibitor) + 1.21(Gentamicin 3'-N-acetyltransferase inhibitor) + 0.258(Gout treatment) -0.332(Prostate disorders treatment) + 0.133(JUN expression enhancer) + 0.103(Irritable Bowel syndrome treatment) -0.408(Tyrosine-protein kinase TXK inhibitor) -0.199(Antiviral (Hepatitis)) -0.292(Metalloproteinase-2 inhibitor) -0.642(Cathepsin S inhibitor) + 0.374(Chorea) + 0.678(Phosphate acetyltransferase inhibitor) + 0.18(Systemic lupus erythematosus treatment) + 0.784(Thymidine kinase (Herpes simplex virus 2) inhibitor) + 0.314(Protein kinase B gamma inhibitor) + 0.271(3 Beta-hydroxy-delta 5-steroid dehydrogenase inhibitor) -0.219(Prostaglandin H2 antagonist) + 0.492(KLK3 expression inhibitor) -0.216(Platelet aggregation inhibitor) -0.486(Heat shock protein 90 antagonist) + 0.537(CYP2G1 substrate) + 1.07(Adenosine A3 receptor antagonist) + 0.235(Bone formation stimulant) + 0.397(Allergic reaction) + 0.2(Toxic. vascular) -0.581(Protein-Npi-phosphohistidine-sugar phosphotransferase inhibitor) + 0.197(Antidiabetic symptomatic) -0.328(Leucyltransferase inhibitor) -0.578(UDP-N-acetylmuramate dehydrogenase inhibitor) -0.019(Melatonin antagonist) -0.152(Cyclin-dependent kinase 5 inhibitor) + 0.577(Caspase 3 inhibitor) + 0.369(Spasmolytic) -0.769(Malate synthase inhibitor) -0.266(Paraplegia) -0.977(Beta 2 adrenoreceptor agonist) -0.288(Panic) + 0.486(Sentrin-specific protease 6 inhibitor) -0.423(CDK4/cyclin D1 inhibitor) + 0.273(Trypsin III inhibitor) + 0.647(Gamma-butyrobetaine dioxygenase inhibitor) + 0.433(Mediator release inhibitor) -0.205(Epithelial sodium channel blocker) -0.298(Dyspnea) -0.303(Adenosylhomocysteine nucleosidase inhibitor) -1.5(Alpha-N-acetylgalactosaminide alpha-2.6-sialyltransferase inhibitor) + 0.976(Pyruvate dehydrogenase stimulant) + 0.13(Beta 1 adrenoreceptor antagonist) -0.258(Ribosomal protein S6 kinase alpha 1 inhibitor) -0.455(Thiosulfate sulfurtransferase inhibitor) + 0.141(Autoimmune disorders treatment) + 0.287(ID1 expression inhibitor) + 0.459(AMP-activated protein kinase inhibitor) -0.193(Antipsychotic) -0.55(Aurora kinase inhibitor) + 0.149(Sarcosine oxidase inhibitor) -0.964(CDC25C inhibitor) -0.468(Potassium channel (Ca-activated) activator) -0.202(L lactate dehydrogenase C inhibitor) + 0.374(MAP kinase kinase 7 inhibitor) -0.301(Pruritus) + 1.01(Uridine phosphorylase inhibitor) -0.283(Microtubule stabilization) -0.694(Trace amine-associated receptor 1 antagonist) -0.416(Benzodiazepine agonist partial) + 0.577(Butyrylcholinesterase inhibitor) -0.328(Chemopreventive) + 0.171(Protein 30S ribosomal subunit inhibitor) -0.362(Hyperbilirubinemia) + 0.327(Confusion) -0.462(Histamine H2 receptor agonist) + 0.387(FOS expression enhancer) + 0.149(Excitability) -0.176(Ribosomal protein S6 kinase alpha 2 inhibitor) -0.149(CYP3A4 inhibitor) -0.27(Urinary retention) + 0.161(Cholestenone 5alpha-reductase inhibitor) -0.243(Prostaglandin F2 alpha antagonist) + 0.168(APOA1 expression enhancer) -0.268(Non-steroidal antiinflammatory agent) -0.442(5-Alpha-reductase inhibitor) -0.177(MAP3K7 inhibitor) -0.0885(Carbonyl reductase [NADPH] 1 inhibitor) + 0.407(Nitrilase inhibitor) -0.607(Neuropathy treatment) -0.216(MAP kinase 8 inhibitor) -0.567(UGT1A1 substrate) + 0.147(Dopamine precursors) + 0.345(HMGCR expression inhibitor) -0.539(Sphingosine kinase inhibitor) + 0.176(Insecticide) -0.173(Plasminogen activator inhibitor) + 0.184(Lichenoid eruption) -0.206(Interleukin 1b antagonist) -0.132(Gastric emptying disorders treatment) -0.422(5 Hydroxytryptamine 5A antagonist) -0.245(Phospholipase A1 inhibitor) + 0.342(I kappa B kinase inhibitor) -0.165(Methemoglobinemia) + 0.312(BCL2 expression inhibitor) -0.373(Sensitization) + 0.449(Ulcer. peptic) -0.36(Abortion inducer) + 0.485(Thromboxane A2 antagonist) -0.289(Melatonin 1 antagonist) -0.219(PTGS2 expression enhancer) -0.507(Peptidylglycine monooxygenase inhibitor) -0.478(Aspartate ammonia-lyase inhibitor) -0.78(Dipeptidyl peptidase VI inhibitor) + 0.158(Geranylgeranyltransferase I inhibitor) -0.505(Indanol dehydrogenase inhibitor) + 0.142(Xanthine-like) + 0.673(2-Isopropylmalate synthase inhibitor) -0.147(CDK1/cyclin B inhibitor) + 0.944(Deoxyguanosine kinase inhibitor) -0.367(Catechol 1.2-dioxygenase inhibitor) -0.457(Tyrosine-protein kinase ABL2 inhibitor) -0.345(Oxalate oxidase inhibitor) + 0.329(SELENBP1 expression inhibitor) + 0.243(MAP kinase 1 inhibitor) + 0.394(15-Lipoxygenase inhibitor) + 0.158(Diuretic inhibitor) + 0.246(Skin irritation. weak) -0.362(Tryptase 1 inhibitor) -0.101(Antiischemic) + 0.512(Cell wall synthesis inhibitor) -0.0989(Antineoplastic (renal cancer)) + 0.195(Anorgasmia) + 0.207(Interleukin 1 antagonist) + 0.262(Fibrinogen alpha chain inhibitor) + 0.187(Dyslipidemia) + 0.13(Purinergic P2X1 antagonist) -0.147(HIV-2 pol protein inhibitor) + 0.136(Focal adhesion kinase 1 inhibitor) -0.344(WARS expression enhancer) + 0.468(Tyrosine transaminase inhibitor) -0.343(SQLE expression inhibitor) -0.22(Hemostatic) + 0.428(Trans-1.2-dihydrobenzene-1.2-diol dehydrogenase inhibitor) -0.168(Prolactin release inhibitor) -0.533(Peptidyl-Lys metalloendopeptidase inhibitor) -0.611(AMP nucleosidase inhibitor) + 0.14(Erythema) + 0.382(Membrane dipeptidase inhibitor) + 0.273(CYP3A3 substrate) -0.485(CYP26A1 expression enhancer) + 0.346(JNK mitogen-activated protein kinase inhibitor) + 0.54(3-Hydroxyanthranilate 3.4-dioxygenase inhibitor) + 0.116(Psychostimulant) -0.164(DNA-dependent protein kinase inhibitor) -0.18(Beta-adrenergic receptor kinase inhibitor) + 0.177(Peroxidase substrate) -0.308(Cholesterol esterase inhibitor) -0.083(Growth stimulant) -0.328(UGT2B1 substrate) -0.117(Endothelin B receptor antagonist) + 0.303(3-Hydroxybutyrate dehydrogenase inhibitor) + 0.149(Hypolipemic) + 0.148(Insulysin inhibitor) + 0.116(Matrix metalloproteinase 4 (membrane-type) inhibitor) + 0.149(Carcinogenic. breast) -0.0768(Pulmonary hypertension treatment) -0.138(Carcinogenic. rat) + 0.112(Pantetheine-phosphate adenylyltransferase inhibitor) -0.0957(D-Amino-acid oxidase inhibitor) + 0.257(UGT2B substrate) -0.132(Phosphorylase kinase gamma subunit 1 inhibitor) + 0.142(CYP11B2 inhibitor) + 0.588(CYP27 substrate) + 0.111(Lck kinase inhibitor) -0.433(DNA polymerase III polC-type inhibitor) + 0.118(Phosphoinositide dependent kinase 1 inhibitor) + 0.0745(Cathepsin B inhibitor) + 0.526(Fibrinogen beta chain inhibitor) -0.129(Antidiuretic hormone agonist) -0.406(4-Hydroxy-2-oxoglutarate aldolase inhibitor) + 0.0989(Peroxisome proliferator-activated receptor delta antagonist) -0.249(Glutamate (mGluR6) antagonist) -0.614([3-methyl-2-oxobutanoate dehydrogenase (lipoamide)]-phosphatase inhibitor) + 0.221(Choline sulfotransferase inhibitor) -0.102(Parkinsonism) -0.298(Transcription factor RelA inhibitor) + 0.199(SLC7A11 expression enhancer) + 0.231(Phenylalanine 4-hydroxylase inhibitor) + 0.238(Nerve growth factor antagonist) -0.369(Glutathione synthase inhibitor) + 0.246(Inositol 1.4.5-trisphosphate 3-kinase inhibitor) + 0.0859(Sodium/glucose cotransporter 2 inhibitor) -0.21(AMPA 2 receptor antagonist) -0.0779(Lysophosphatidic acid 2 receptor antagonist) -0.319(3(or 17)beta-hydroxysteroid dehydrogenase inhibitor) + 0.142(Nav1.6 sodium channel blocker) -0.11(Protein kinase (Mos. Mil/Raf. MEKK. RIPK. TESK. LIMK. IRAK. ILK. Activin/TGF-beta) inhibitor) + 0.0788(DNA primase inhibitor) + 2.86(Length^3) + 0.0926(Baculoviral IAP repeat-containing protein 2 inhibitor) + 0.349(Linoleate isomerase inhibitor) + 0.0738(Luteinizing hormone-releasing hormone antagonist) + 0.322(Gastricsin inhibitor) + 0.271(Anticholelithogenic) + 0.0556(Carbonic anhydrase VB inhibitor) -0.0735(Vasopressin 1 agonist) + 0.214(Alanine dehydrogenase inhibitor) -0.157(CYP2B4 substrate) -0.116(DNA-(apurinic or apyrimidinic site) lyase inhibitor) + 0.213(Proto-oncogene protein c-fos inhibitor) + 0.174(AR expression enhancer) -0.141(Fibromyalgia syndrome treatment) + 0.0747(Dopamine D1 agonist) -0.0407(Analgesic. non-opioid) + 0.216(Aryl hydrocarbon receptor antagonist) -0.199(Glutamate synthase (ferredoxin) inhibitor) -0.0551(Cognition disorders treatment) -0.185(Free fatty acid receptor 1 agonist) -0.126(Analgesic stimulant) + 0.0448(Gastrointestinal disorders treatment) -0.177(Dihydropyrimidinase inhibitor) + 0.0804(Monodehydroascorbate reductase (NADH) inhibitor) + 0.191(CMP-N-acetylneuraminate monooxygenase inhibitor) -0.12(Monophenol monooxygenase inhibitor) -0.0481(Rhinitis) -0.0798(CYP2A1 substrate) -0.0475(Sigma receptor antagonist) + 0.0448(Phosphodiesterase XI inhibitor) + 0.144(Dihydrofolate reductase (Mycobacterium avium) inhibitor) -0.135(Dextransucrase inhibitor) + 0.0437(Ca2+/calmodulin-dependent kinase II alpha inhibitor) -0.0909(NOS2 expression inhibitor) + 0.0346(Caspase 7 inhibitor) -0.0299(Hemozoin inhibitor) -0.0328(Aggrecanase 1 inhibitor) + 0.0985(MAP kinase signal-integrating kinase 1 inhibitor) -0.0714(Cyclic nucleotide specific phosphodiesterase inhibitor) + 0.0867(Metalloproteinase inhibitor) -0.0785(Integrin alpha5beta6 antagonist) -0.0422(IFITM1 expression enhancer) + 0.0236(Antiamyloidogenic) -0.0259(Neuropeptide Y2 antagonist) -0.0165(Fibrosis treatment) + 0.0135(Cholecystokinin A agonist) -0.026(PPARG expression enhancer) + 0.0292(Intermittent claudication treatment) -0.0129(Melanin-concentrating hormone receptor 2 antagonist) -0.0293(CYP2B11 substrate) + 0.0101(Benzodiazepine receptor peripheral-type antagonist) -0.00849(HIV-1 reverse transcriptase inhibitor) + 0.0104(Sialidase 3 inhibitor) -0.0145(Thrombophlebitis) -0.0225(Shal potassium channel blocker) -0.00972(Platelet activating factor alpha antagonist) + 0.0165(Phospholipase D inhibitor) + 0.00854(Endometrios treatment) + 0.00751(Hematotoxic) + 0.0163(Imidazoline I2 receptor antagonist) + 0.0147(Arachnoiditis) -0.00895(Dopamine D3 agonist) + 0.00338(Integrin alpha1beta1 antagonist) -0.00422(Tumour necrosis factor antagonist) -0.00592([protein-PII] uridylyltransferase inhibitor) -0.00211(Polyamine biosynthesis inhibitor) -0.000387(Keratoses actinic (solar) treatment) + 0.000631(Geranylgeranyltransferase inhibitor) + 5.62

Model 50
[truncated: 2,740,701 more chars]
